# Supplementary material for: Mortality from gastrointestinal congenital anomalies at 264 hospitals in 74 low-income, middle-income, and high-income countries: a multicentre, international, prospective cohort study
Source: PubMed Central journal article supplement (PMC8314066; doi:10.1016/s0140-6736(21)00767-4), 2021-07-24
Supplement: mmc1.pdf [file mmc1.pdf]

# THE LANCET

## Supplementary appendix

This appendix formed part of the original submission and has been peer reviewed. We post it as supplied by the authors.

Supplement to: Global PaedSurg Research Collaboration. Mortality from gastrointestinal congenital anomalies at 264 hospitals in 74 low-income, middle-income, and high-income countries: a multicentre, international, prospective cohort study. *Lancet* 2021; published online July 13. [http://dx.doi.org/10.1016/S0140-6736\(21\)00767-4](http://dx.doi.org/10.1016/S0140-6736(21)00767-4).

## **Supplementary appendix**

Supplement to:

Mortality from Gastrointestinal Congenital Anomalies at 264 Hospitals in 74 Low-, Middle- and High-Income Countries: A Multicentre, International, Prospective Cohort Study

## **Mortality from Gastrointestinal Congenital Anomalies at 264 Hospitals in 74 Low-, Middle- and High-Income Countries: A Multicentre, International, Prospective Cohort Study**

Global PaedSurg Research Collaboration

### **Appendix Supplement 1: Authorship (all co-authors PubMed citable)**

**Principal Investigator:** Naomi Jane Wright (King's College London, UK).

**Steering Committee:** Adesoji Ademuyiwa (Lagos University Teaching Hospital, Nigeria), Emmanuel Ameh (National Hospital, Abuja, Nigeria), Justine Davies (University of Birmingham, UK), Kokila Lakhoo (University of Oxford and Oxford University Hospitals, UK), Dan Poenaru (McGill University, Montreal, Canada), Emily Rose Smith (Baylor University, Texas, USA), Niyi Ade-Ajayi (King's College Hospital, UK), Nick Sevdalis (King's College London, UK), Andrew JM Leather (King's College London, UK).

**Writing Committee:** Naomi Jane Wright\* (King's College London, UK), Adesoji Ademuyiwa (Lagos University Teaching Hospital, Nigeria), Melika Akhbari (King's College London, UK), Emmanuel Ameh (National Hospital, Abuja, Nigeria), Muhammad Arshad (Liaquat National Hospital, Aga Khan University Hospital, Pakistan), Dayang Anita Abdul Aziz (UKM Medical Centre, Malaysia), Abdel Douiri (King's College London, UK), Maria Elstad (King's College London, UK), Camila Girardi Fachin (Federal University of Parana, Brazil), Kokila Lakhoo (University of Oxford and Oxford University Hospitals, UK), Bruno Martinez-Leo (Moctezuma Children's Hospital, Mexico), Ashrarur Rahman Mitul (Dhaka Shishu (Children) Hospital, Bangladesh), Alliance Niyukuri (Kibuye Hope Hospital, Burundi), Cristiana Riboni (University of Pavia, Italy), Marcus Sim (Stepping Hill Hospital, UK), Emily Rose Smith (Baylor University, Texas, USA), Stephen Tabiri (Tamale Teaching Hospital, Ghana), Dan Poenaru (McGill University, Montreal, Canada), Justine Davies (University of Birmingham, UK), Nick Sevdalis† (King's College London, UK), Niyi Ade-Ajayi† (King's College Hospital, UK), Andrew JM Leather† (King's College London, UK).  
\*First author and study guarantor. †Joint last authors contributed equally.

**Statistical Analysis:** Abdel Douiri\* (King's College London, UK), Mohamed Fahmy Doheim (Alexandria University Hospital, Egypt), Maria Elstad\* (King's College London, UK), Fowzia Ibrahim (King's College London, UK), Natalie Moitt (King's College London, UK), Naomi Jane Wright\* (King's College London, UK).  
\*Lead statisticians.

**Lead Organisers:** Sadi Abukhalaf (Al Quds University, Palestine), Nana Adofo-Ansong (Mahikeng Provincial Hospital, South Africa), Melika Akhbari (King's College London, UK), Ahmad Alhamid (University of Aleppo, Syria), Osaid H. Alser (University of Oxford, UK), Ibrahim Al-Slaibi (West Bank and Gaza, Palestine), Emrah Aydin (Koc University, Turkey), Yousra-Imane Benaskeur (Universite de Montreal, Canada), Andile Maqhawe Dude (National University of Science and Technology, Mpilo Hospital, Zimbabwe), Shrouk M. Elghazaly (Assiut University, Egypt), Safa abdal Elrais (University of Tripoli, Libya), Helena Franco (Bond University, Australia), Sophia Hashim (University College London, UK), Laura Herrera (Geisel School of Medicine, Dartmouth, USA), Intisar Hisham (Kenyatta National Hospital, Kenya), Gabriella Hyman (University of Witwatersrand, South Africa), Henang Kwasau (College of Medicine and Allied Health Sciences, University of Sierra Leone), Yang Liu (Children's Hospital, Zhejiang University School of Medicine, China), Bruno Martinez-Leo (Moctezuma Children's Hospital, Mexico), Kelly Naranjo (Columbia University Medical Centre, USA), Sodumisa Ngwenya (National University of Science and Technology, Mpilo Hospital, Zimbabwe), Ibrahim Nour (Jordan University Hospital, Jordan), Samuel Parker (Imperial College London, UK), Cristiana Riboni (University of Pavia, Italy), Mahmoud Saleh (University of Gezira, Sudan), Hosni Khairy Salem (Cairo University, Egypt), Godfrey Sama (Muhimbili University of Health and Allied Sciences, Tanzania), Patricia Shinondo (University Teaching Hospital, Lusaka, Zambia), Marcus Sim (Stepping Hill Hospital, UK), Hannah Thompson (King's College Hospital, UK), Harmony Kaur Ubhi (King's College Hospital, UK), Agota Vaitkiene (Faculty of Medicine, Vilnius University, Lithuania), Dominique Vervoort (Harvard Medical School, USA), Isabelle Williams (Cambridge University, UK), Mina A. Yacoub (Cairo University, Egypt), Aayenah Yunus (King's College London, UK).

**Lead Investigators:** Muhammad Bin Amjad, Muhammad Amjad Chaudhary, Muhammad Adnan Khan Khattak (Children's Hospital, PIMS, Islamabad, Pakistan), Marlene Anaya Dominguez (Children's Hospital Manuel A. Villaruel Cochabamba, Bolivia), Samiul Hasan, Sabbir Karim, Ashrarur Rahman Mitul (Dhaka Shishu (Children) Hospital, Bangladesh), Paolo Bragagnini, Segundo Rite (Hospital Universitario Miguel Servent,

Zaragoza), Hana Arbab, Lubna Samad, Aqil Soomro (Indus Hospital, Pakistan), Niveshni Maistry (John Radcliffe Hospital, UK), Raed Nael Al-Taher, Ibrahim Rabi Nour, Osama Abdul Kareem Sarhan (Jordan University Hospital, Jordan), Muhammad Arshad, Taimur Qureshi, Hina Yousuf (Liaquat National Hospital, Pakistan), Candy SC Choo, Doris Mae Dimatac, Shireen Anne Nah (KK Women's and Children's Hospital, Singapore), Vijay Anand Ismavel, Ann Miriam, Shajin T (Makunda Christian Leprosy and General Hospital, India), Monica Ivanov, Andreea Madalina Serban (Marie Curie Hospital in Bucharest, Romania), Bruno Martinez-Leo (Moctezuma Children's Hospital, Mexico), Eva Blazquez-Gomez, Luis Garcia-Aparicio, Marti Iriondo, Jordi Prat, Xavier Tarrado (Hospital Sant Joan de Deu, Spain), Lars Hagander, Emma Svensson (Skane University Hospital's Pediatric Care Hospital, Lund, Sweden), Alhassan Abdul-Mumin, Dominic Bagbio, Sheila Owusu, Stephen Tabiri (Tamale Teaching Hospital, Ghana), Dayang Anita Abdul Aziz (UKM Medical Centre, Kuala Lumpur, Malaysia).

### **Regional/Continent Leads:**

*ASEAN Countries:* Dayang Anita Abdul Aziz (Hospital Canselor Tuanku Muhriz, Malaysia). *Australasia:* Sebastian King (Royal Children's Hospital, Australia). *COSECSA Region, Africa:* Milliard Derbew (Addis Ababa University, Ethiopia). *Europe:* Alexis Arnaud (Hospital Anne De Bretagne, France). *Middle-East:* Mahmoud Elfiky (Cairo University, Egypt). *North Africa:* Ahmed Negida (Zagazig University, Egypt). *South America:* Marcia Abruñhosa Matias (Hospital Federal de Bonsucesso, Brazil), Maricarmen Olivos Perez (San Juan de Dios Hospital). *West Africa:* Alliance Niyukuri (Kibuye Hope Hospital, Burundi).

### **Country Leads:**

*Afghanistan:* Mohammad Rafi Fazli (Ghalib University Hospital, Herat). *Algeria:* Nadia Hamidi (Centre Hospitalo-Universitaire Hassan AEK), Souhern Touabti (Hopital Mere-Enfant). *Angola:* Rossana Francisco Chiplavela (Pionero Zeca do Lubango). *Argentina:* Pablo Lobos (Hospital Italiano de Buenos Aires). *Australia:* Brendan Jones (Gold Coast University Hospital), Damir Ljuhar (Monash Children's Hospital), Sebastian King (Royal Children's Hospital). *Austria:* Georg Singer (Medical University of Graz). *Bangladesh:* Samiul Hasan (Dhaka Shishu (Children) Hospital). *Belgium:* Annelien Cordonnier (Katholieke Universiteit Leuven). *Bolivia:* Lorena Jauregui (Mario Ortiz Children's Hospital). *Bosnia:* Zlatan Zvizdic (Clinical Centre University of Sarajevo). *Brazil:* Marcia Abruñhosa Matias, Camila Girardi Fachin (Federal University of Parana). *Brunei Darussalam:* Janice Wong (RIPAS Hospital). *Burundi:* Alliance Niyukuri (Kibuye Hope Hospital). *Canada:* Etienne St-Louis (Montreal Children's Hospital). *Chile:* Maricarmen Olivos Perez (San Juan de Dios Hospital). *China:* Qiang Shu (Children's Hospital, Zhejiang University School of Medicine). *Colombia:* Cataline Correa (Hospital Militar Central). *Czech Republic:* Lucie Pos (Motol University Hospital, Charles university 2nd Medical Faculty). *Dominican Republic:* Elvyn Alcantara, Erick Feliz (Hospital Infantil). *Ecuador:* Luis Enrique Zea-Salazar (Omni Hospital). *Egypt:* Mahmoud Elfiky (Cairo University). *Ethiopia:* Milliard Derbew (Addis Ababa University). *France:* Alexis Arnaud (Hospital Anne De Bretagne), Matthiew Peycelon (CHU APHP-Robert Debre). *Gabon:* Nzanzu Kipata Anatole (Bongolo Hospital). *Germany:* Judith Lindert (University Hospital Schleswig Holstein, Luebeck). *Ghana:* Stephen Tabiri (Tamale Teaching Hospital). *India:* Dhruva Ghosh (Christian Medical College and Hospital). *Indonesia:* Cathline Freya Adhiwidjaja (Rumah Sakit Anak dan Bunda Harapan Kita Jakarta). *Iran:* Ahmad Khaleghnejad Tabari, Saran Lotfollahzadeh (Pediatric Surgery Research Center, RICH, Mofid Children's Hospital, SBMU). *Iraq:* Haidar Mohammad Muhssein (Kufa University). *Italy:* Noemi Pasqua, Fabrizio Vatta (San Matteo Hospital). *Kenya:* Hetal Gohil, David Kihiko (University of Nairobi and Kenyatta National Hospital). *Jordan:* Ibrahim Nour (Jordan University Hospital). *Libya:* Suad Ahmed Almada, Muhammed Elhadi, Safa abdal Elral (Tripoli Children's Hospital). *Lithuania:* Gilvydas Verkauskas (Faculty of Medicine, Vilnius University). *Macedonia:* Toni Risteski (University Clinic for Pediatric Surgery Skopje). *Malaysia:* Dayang Anita Abdul Aziz (Hospital Canselor Tuanku Muhriz). *Mexico:* Alejandro Peharrieta Daher (Hospital Juarez de Mexico). *New Zealand:* James Hamill (Starship Children's Hospital). *Nigeria:* Taiwo Lawal (University College Hospital, Ibadan). *Palestine – Gaza:* Nathan Novotny (Al-Makassad Hospital), Maisara Al-Rayyes, Osaid H. Alser (University of Oxford, UK). *Palestine – West bank:* Nathan Novotny (Al-Makassad Hospital), Sadi Akuhalf (Al Quds University), Ahmad G. Hammour (Palestinian Medical Complex). *Pakistan:* Muhammad Amjad Chaudhry (Children's Hospital and Shaheed Zulfiqar Ali Bhutto Medical University, Islamabad), Muhammad Arshad (Liaquat National Hospital, Aga Khan University Hospital). *Papua New Guinea:* Benjamin Yapo (Mount Hagen General Hospital), Jack Mulu (Port Moresby General Hospital). *Peru:* Lily Saldana (Instituto Nacional de Salud del Nino). *Philippines:* Beda Espineda (Philippine Children's Medical Center). *Poland:* Krystian Toczewski (Wroclaw Medical University). *Rwanda:* Isaac Ndayishimiye, Eugene Tuyishime (University Teaching Hospital of Kigali). *Saudi Arabia:* Enaam Raboe (King Fahd Armed Forces Hospital). *Scotland:* Gregor Walker (NHS Greater Glasgow and Clyde), Philip Hammond (Royal Hospital for Sick Children, Edinburgh). *Serbia:* Ivona Djordjevic (Clinical Centre for Paediatric Surgery and Orthopaedics). *Singapore:* Shireen Anne Nah (KK Women's and Children's Hospital). *South Africa:* Milind Chitnis (Frere Hospital), Gabriella Hyman (University

of Witwatersrand). *South Korea*: Sanghoon Lee, Joonhyuk Son (Samsung Medical Centre). *Spain*: Luis Garcia-Aparicio (Hospital Sant Joan de Déu). *Sweden*: Muaad Hussien (Karolinska Institutet Hospital), Lars Hagander, Emma Svensson (Skane University Hospital's Paediatric Care Hospital). *Sudan*: Enas Musa Ismail (Khartoum Teaching Hospital), Sawazen Malik (Soba University Hospital). *Syria*: Ahmad Alhamid (Aleppo University Hospital). *Tanzania*: Godfrey Sama (Muhimbili University of Health and Allied Sciences). *Thailand*: Ampaipan Boonthai (Faculty of Medicine, Ramathibodi Hospital). *Tunisia*: Nesrine Ben Hadj Dahman (Hedi Chaker Hospital). *Turkey*: Emrah Aydin (Koc University). *United Kingdom*: Nigel J Hall (University of Southampton), Naomi Wright (King's College London). *Uruguay*: Fabiola Ruth Castedo Camacho, Helena Sobrero (Centro Hospitalario Pereira Rossell). *United States of America*: Marilyn Butler (Oregon Health and Science University). *Uzbekistan*: Aliev Makhmudjan Muslimovich (Republican Specialized Scientific Practical Medical Center of Pediatrics, Tashkent). *Zambia*: Bruce Bvulani, Patricia Shinondo (University Teaching Hospital, Lusaka). *Zimbabwe*: Andile Maqhaw Dube (Mpilo Hospital).

## **Local Investigators:**

### **Low-income countries**

*Afghanistan*: Sayed Aman Haldari, Abdul Baqi Monaware, Qais Muraveji, Ajaml Sherzad, Muhammad Yousuf Murzaie, Ahmad Zia Samadi (Ataturk National Children Hospital).

*Burundi*: Butoyi Jean Marie Vianney (Hospital Mutoyi, Gietga); Sonia Inamuco, Alliance Niyukuri, Jesh Thiessen, Ntakarutimana Venant (Kibuye Hope Hospital, Hope Africa University); Mbonicura Jean Claude, Niyonkuru Jeremie (Teaching Hospital University of Kamenge).

*Ethiopia*: Milliard Derbew, Samuel Negash, Amezene Tadesse (Addis Ababe University).

*Gambia*: Abdoulie Bah, Kajali Camamra, Armandou Correa, A. Gai, John N. Jabang, Musa Jaiteh, Cherno S. Jallow, Charles A. Roberts, Babucarr Sowe (Edward Francis Small Teaching Hospital).

*Rwanda*: Yves Castar Nezerwa, Ainhoa Costas-Chavarri, Jean De Dieu Muragijimana, Georges Gasana, Joseph Lule, Albert Ndata, Turatsinze Simeon, Ian Shyaka Gashugi (Rwanda Military Hospital); Innocent Itangishaka, Emmanuel Kayibanda, Emery Manirambona, Jean Paul Mvukiyehe, Isaac Ndayishimiye, Kwizera Jean Raymond, Eugene Tuyishime (University Teaching Hospital of Kigali).

*Tanzania*: Joseph Elisante, Mubashir Jusabani, Sengua Koipapi, Jay Lodhia, Emmanuel Manjira, David Msuya, Sakina Rashid, Meghna Solanki, Shahnoor Syed, Murad Tarmohamed (Kilimanjaro Christian Medical Centre).

### **Middle-income countries**

*Algeria*: Touabti Souhem, Nabti Sara, Brahimi Sihem, Benmansour Saousen (Hôpital Mère - Enfant EHS El Eulma, Setif); Iaiche Achour Toufik, Bouguermouh Dania, Alouani Habiba, Baghdadi Nour El Islam Mounira (Le Nefissa Hamoud University Hospital).

*Angola*: Rossana Francisco Chipalavela, Liliana Aragão, Victor Gonçalves (Pediatric hospital David Bernardino).

*Argentina*: Diego Martin Aranda, Gabriel Comba, Marianella Depetrini, Julio Lapalma, Lucio Palazzi, Liliana Pardo, Valeria Pelussi, Veronica Sofficci, Justo Vaquila (Children's Hospital of Santa Fe); Daniel Emilio Gonzalez, Humberto Scherl (Dr Humberto Notti Pediatric Hospital of Mendoza); Mariana Bernaus, Andrea Damiani, Bonavia Horacio, Karen Liljestrom, Carlos Mac, Daniel Putruele, Cesar Jauri (Hospital de Niños Victor J. Vilela, Rosario, Santa Fe); Marcelo Mauricio Lino Urquiza, Pablo Lobos, Pedro Mercado, Maria Florencia Varela (Hospital Italiano de Buenos Aires, Buenos Aires); Carlos Alberto, Paloma Caseb, Maria Delia Charras, Fabio Cornelli, Maria Belen Dallegre, Victor Hugo Defago, Marcos Federico Leyba, Enrique Romero Manteola, Carlos Mieres, Marcelo Molina, Adriana Morales, Celeste Carolina Patiño Gonzalez, Pablo Ravetta, Nahuel Ignacio Rivarola, Maria Tatiana Szklarz (Hospital Maternoneonatal, Córdoba); Lucia Beatriz Arnoletto, Otilia Eva Blain, Mauro Nicolas Bravo, Carla Sofia Contreras, Luciana Martina Herrera Pesara, Victor Hugo Defago, Jose Gilardi, Enrique Romero Manteola, Carlos Mieres, Maria Eugenia Moreno, Nair Rojas, Nancy Sanchez, Carlos Ariel Sferco, Soledad Simon (Hospital Materno Provincial, Córdoba); José Calderón, Elsa Arancibia Gutiérrez, Enrique Huespe, Gabriela Losa (Hospital Público Materno Infantil, Salta); Valentina Baistrocchi, Marcelo Galdeano, Pablo Medard, Yanina Silva (Hospital Rawson, San Juan); Lorna Andreussi,

Romina Avile, Ezequiel Bianchin, Rodrigo Cepeda, Alejandrina Cripovich, Maria Gabriela Puig, Carina Herrera, Susana Iracelay, Debora Montoya, Dolores Marcos, Nelly Palacios, Belen Serezo (Maternidad Martin, Rosario, Santa Fe); Ines Sueiras (Fundación Dr. J.R. Villavicencio); Oscar Di Siervi, Maria del Carmen Junes, Carolina Millán, Luzia Toselli (Fundacion Hospitalaria).

*Bangladesh:* Fatema Sayeed (Dhaka Medical College Hospital); Abdullah-Al-Mamun, Tamanna Ferdousi, Samiul Hasan, Umama Huq, Sabbir Karim, Khalid Mahmud, Refoyez Mahmud, Ashrarur Rahman Mitul, Sadia Sultana (Dhaka Shishu (Children) Hospital).

*Belarus:* Alexander Svirsky (Republican scientific practical center of pediatric surgery, Minsk).

*Bolivia:* Marlene Anaya Dominguez, Mariana Sadagurschi (Children's Hospital Manuel A. Villarroel Cochabamba); Lorena Jáuregui, Amalia Negrete, Denisse Sempertegui (Mario Ortiz Children's Hospital Suarez, Santa Cruz); Aracelly Terán (Women's Hospital Percy Boland Rodríguez Santa Cruz).

*Bosnia and Herzegovina:* Elna Biber, Nejra Dendusic, Ajla Hamidovic, Dzan Horozic, Lamija Hukic, Azra Karamustafic, Kenan Karavdic, Emina Letic, Amira Mesic, Emir Milisic, Amila Muhic, Nusret Popovic, Adnan Sabic, Adna Saracevic, Anesa Sehic, Nejra Selak, Emir Sokolovic, Nedim Vanis, Sabina Terzic, Asmir Jonuzi, Nada Zvizdic, Zlatan Zvizdic (Clinic of Paediatric Surgery, Clinical Centre University of Sarajevo, Sarajevo).

*Brazil:* Amanda Ginani Antunes, Fernando Antonio Bersani Amado, Giovana Camargo de Almeida, Leila Grisa Telles, Luiz Roberto Farion de Aguiar; Elisângela Mattos e Silva (Associação Hospitalar de Prot Infancia Dr. Raul Carneiro); Miguel Angelo Agulham, Karin Becker, Cristiano Bischoff, André Ivan Bradley dos Santos Dias, Camila Girardi Fachin, Elis Novochadlo Klüppel (Federal University of Parana); Adriano Luis Gomes, Flavio Augusto Menin, Danielle Paula de Oliveira, Danielle Lopes Teixeira Ferdinando (Fundação Faculdade Regional de Medicina S J Rio Preto); Fabricio Zottis Barcelos, Natalia Baseggio, Nicole Knorr Brenner, Rafael Trindade Deyl, Carolina Dure, Iuri Nunes Kist, Rafael Bueno Mazzuca, Sarah Bueno Motter, Yna Ramos, Cristine Suzana Trein (Hospital da Criança Santo Antônio - Santa Casa de Porto Alegre); Kamila de Deus Passos Leles, Érika Alves Dutra da Silva, Antonio Cirpiano Gurgel do Amaral Junior, Marília Silva Ferreira dos Santos, Mariana Furtado, Thayná Lopes de Almeida, Susy Oliveira de Andrade, Lais Sartori Giovanoni, Horácio Tamada (Hospital de Base Dr. Ary Pinheiro, Porto Velho); Leticia Feldens, Luciano Ferraz Schopf, José Carlos Soares de Fraga, Felipe Colombo de Holanda, Paola Maria Brolin Santis Isolan, Julia Loyola Ferreira, Carla Luisa Bruxel (Hospital de Clínicas de Porto Alegre); Josiane Bernart Zanellato (Hospital do Rocio); Patricia Viana Guimarães Flores (Hospital Federal de Bonsucesso); Karina Ilheu da Silva, Karine Furtado Meyer, Cristina Reuter, Bianca Ribas, Francis Tanise Casado (Hospital Santo Antônio Blumenau Santa Catarina); Flavia de Azevedo Belesa, Acimar Gonçalves da Cunha Júnior, Beatriz Souza Barros (Hospital Materno Infantil de Brasília – HMIB); Arthur Almeida Aguiar, Carolina Gonçalves Borges, Rodrigo Melo Gallindo (Instituto de Medicina Integral Professor Fernando Figueira); Maria Lucia da Silva Augusto, Darli Fernandes de Oliveira, Rachel Fernandes de Souza, Bianca M. R. Martins, Fernanda Ribeiro de Fernandez y Alcázar, Stella Sabbatini, Carla Silva dos Santos, Mariana de Souza Santos Ferreira, Ana Beatriz Souza Machado, Juliana Werneck Raposo (Instituto Fernandes Figueira, Rio de Janeiro); Geraldo Magela Nogueira Marques (Irmandade da Santa Casa de Misericórdia de Santos); Ana Lúcia Granja Scarabel Nogueira Carrasco, Eliane Mitiko Moriya, Patricia Sayuri Matuda Adachi (SPDM – Associação Paulista para o Desenvolvimento da Medicina); Simone de Campos Vieira Abib, Suely Dornellas do Nascimento, Ruth Guinsburg, Edson Khodor Cury, Daniela Testoni, Mila Torii Correa Leite (Universidade Federal de São Paulo – UNIFESP/EPM).

*China:* Liuming Huang, Mengnan Yu (Baby Children's Hospital, The Seventh Medical Center of PLA General Hospital); Zhibao Lv, Jinjing Lu (Children's Hospital of Shanghai); Shungen Huang, Lulu Chen (Children's hospital of Soochow university); Duote Cai, Rui Chen, Zhigang Gao, Yijiang Han, Ting Huang, Liang Liang, Yang Liu, Wenjuan Luo, Qiang Shu, Jinhua Wang, Peng Wang, Xiaoxia Zhao (The Children's Hospital, Zhejiang University School of Medicine, Binjiang District, Hangzhou); Yong Feng, Chonggao Zhou (Hunan Children's Hospital, Changsha City, Hunan Province); Qiang Bai (Kunming Children's Hospital); Weibing Tang, Hua Xie, Jethishka Motee (Nanjing Children Hospital); Gang Wen, Jianming Zhu (Ningbo Women Children's Hospital); Xiaodong Guo, Junjie Chen, Donglai Hu (Jinhua municipal central hospital); Xiaozhou Bao, Haijing Li, Zhongrong Li, Junying Lv, Guowei Wu, Libin Zhu (The Second Affiliated Hospital & Yuying Children's Hospital of Wenzhou Medical University); Yu Zuo Bai, Wang Dajia (Shengjing Hospital of China Medical University).

*Colombia:* Jerhy Andrade, Catalina Correa, Juliana Mancera, Luis Carlos Rinco (Hospital Militar Central, Bogota); Daniela Castaño Avila, Nathalia Silva Beltrán, Edgar Alzate Gallego, Juanita Gomez, Ghordana

Osorio Fory, Martha Jaramillo, Angelica Maria Forero Ladino, Otto Morales, Beatriz Sanchez, Laura Torres, (Fundacion Valle del Lili – Cali); Sergio Castañeda Espinosa, Lina Maria Pardo, Osbaldo Prieto Vargas (Materno Infantil Salucoop, Villavicencio); Nestor Julien Tinoco Guzman (Sociedad de Cirugia de Bogota Hospital de San Jose, Bogota).

*Dominican Republic:* Elvyn Alcántara, Erick Félix, Eliana Toral (Hospital Infantil Dr. Robert Reid Cabral, Santa Domingo).

*Ecuador:* Enrique Landivar Cino, Gabriela Yulissa Fajardo Ponce, Vicente Salinas (General North Hospital IESS de los Ceibos); Freud Aucatoma Cáceres, Daniel Hinostroza, Santiago Valencia (Hospital de Especialidades Carlos Andrade Marín, Quito); Miguel Astudillo, Elena Bucaram, Elena Chiriboga, Virginia Garcia, Marisol Guayelema, Sandra Lara, Monica Marmol, Adriana Mena, Guillermo Muñoz, Ericka Murillo, Karla Salazar, Janina Sanchez, Julian Silva, Junior Velaña, Ivan Verduga, Leonardo Verduga, Carolina Vergara, Luis Enrique Zea-Salazar (Omni Hospital, Guayaquil).

*Egypt:* Dina Sobhy Abdelhady, Mohamed Abouheba, Karim Osamy Ali, Alaa Mobarak Attia, Ahmed Aboelela, Omar Ossama Elsiraffy, Omar Sameh Emam, Eyad Hassan Falah, Eman Mohamed Farag, Omar Moustafa Fawzy, Khaled Abd Elrahman Ghaly, Islam Abdelmonem Ghorab, Mohamed Abada Hassan, Eman Abouzeid Abouzeid Ibrahim, Tarek Mohamed Kamel, Moustafa A. Laymouna, Mansour Mkayed Mohammed, Rawan Nemer, Ahmed Mohamed Oshiba, Hayssam Rashwan, Nourhan Akram Soliman, Mostafa Zain (Alexandria University Children's Hospital); Menan Ahmed Elsadek, Dalia Gad, Hanan Mahmoud Mohammed, Doaa Samy (Al Zahra Hospital, Cairo); Mahmoud Abdelfattah Ahmed, Gena Mohamed Hamed Ellassall, Shrouk Mahmoud Elghazaly, Tarek Mohamed Essa, Mariam Albatoul Nageh Fouly, Mohammad Nageh Foly, Mohamed Omar Herdan, AbdelShakour Ibrahim, Azhar Arabi Mohammed, Ahmed Mokhtar Mahmoud, Alshaimaa M. Saad, Mahmoud M. Saad, Mohammed Hamada Takrouney (Assiut University Hospital, Assiut); Ahmed Adawy, Sherif Abdelmaksoud, Mohammed El-Ghazaly, Ahmed Elhattab, Mohamed Elewaily, Mohamed Abd Elmenam, Adham Elsaied, Mohamed Elsherbiny, Mohamed Elzohiri, Islam Mansour, Ahmed Rezk, Kareem Sadek, Mirna Sadek, Amr Saleh, Amr Shalaby, Hesham Sheir, Tamer Wafa, Basma Waseem (Mansoura University Children Hospital); Hisham Almohamady, Mohamed Amad, Mohamed Arafa, Helmy Badr, Mohamed Fayeze Fouda, Ahmed Hassan Nofal (Tanta University Hospital, Tanta).

*Gabon:* Dieudonné Lemfuka, Solomon Machedmedze, Elysé Nkunzimana, Anatole Nzanzu, Jennifer O'Connor, Zachary O'Connor (Bongolo Hospital, Lebamba).

*Ghana:* William Appeadu-Mensah, Frank Owusu-Sekyere (Korle-Bu Teaching Hospital, Accra); Francis A. Abantanga, Alhassan Abdul-Mumin, Priscilla Alhassan, Theophilus Teddy Kojo Anyomih, Dominic Bagbio, Sheba MP Kurfah, Sheila Owusu, Stephen Tabiri (Tamale Teaching Hospital).

*India:* Dhruva Ghosh, Vishal Michael (Christian Medical college Ludhiana, Punjab); Vijay Kumar, P Santosh Prabhu, Sundeep PT, Ankit Raj (Kasturba Medical College (Kasturba Hospital) Manipal); Vijay Anand Ismavel, Roshine Mary Koshy, Ann Miriam, Shajin T (Makunda Christian Leprosy and General Hospital, Bazaricherra, Karimganj District).

*Indonesia:* Cathline Freya Adhiwidjaja (Rumah Sakit Anak dan Bunda Harapan Kita Jakarta).

*Iran:* Saran Lotfollahzadeh, Fatemeh Pajouhandeh, Ahmad Khaleghnejad Tabari, Armin Vosoughi (Mofid Children's Hospital, Tehran).

*Iraq:* Ali Farooq Al-Mayoof, Muhamed Jassim Fadhle, Ali Egab Joda (Child's Central Teaching Hospital, Baghdad/ Mustansiriyah Medical College); Hayder Nadhim Obaid AlGabri, Haidar Mohammad Muhssein, (Kufa University, College Of Medicine).

*Jordan:* Layana Al-Halbouni, Sayel H. Alzraikat, Justin Z. Amarin, Waleed H. Ghanem, Sara Al Hussein, Omar Ghazi Hussein, Bashar M. Matour, Amir M. I. Murad, Rand Y. Omari, Abullah Qudah, Ali Shoubaki, Haya H. Suradi, Ahmad H. Yanis, Rajai O. Zurikat (Al-Basheer Hospital - Ministry of Health, Qasabet Amman); Husam Aldean Abuhayyeh, Mohanad Mutasem Alebbini, Raed Nael Al-Taher, Ziad A. Bataineh, Thekriat M. Al Quran, Faris J. Abu Za'nounch (King Abdallah University Hospital - Jordan University of Science and Technology, Faculty of Medicine); Sultan S. Abdelhamid, Ahmad Hasan Aliwisat, Hashem M. Al-Momani, Nijmeh Nasser Alsaadi, Raed Nael Al-Taher, Marzouq Amarin, Esraa Arabiat, Isam Bsisu, Mohammad S.

Jabaiti, Osama Abdul Kareem Sarhan, Raghad M. Murshidi, Ibrahim Rabi Nour, Hibah Qutishat, Yasmeen Z. Qwaider, Louay Y. Zaghlol (Jordan University Hospital, Amman).

*Kenya:* Syeda Ra'ana Hussain, Stanley Mugambi Roseline Ochieng (Aga Khan University Hospital, Nairobi); Corazone Deya, Polycarp Omendo Liyenzero, Kevin Ochieng (Joromongi Oginga Odinga Teaching & Referral Hospital, Kisumu); Nirav Chauhan, Soita Wycliffe Chitiavi, Kuria David, Hetal Gohil, Janan Hania Malik, Felister Mose, Robert Mugo, Timothy Mwai, James Ndungu, Swaleh Shahbal, Francisa Syovata (University of Nairobi and Kenyatta National Hospital, Nairobi).

*Libya:* Aya Albozidi, Wesal Omar F. Saied Aljadidi, Kamila Almagrouk, Nouriyah Ali Alwaggaa, Fatma Bibas, Mala Elgammudi, Yasmine Ali Elhajjaji, Ebtesam Othman Abdulsalam Elkhazmi, Manal Ben Enbaya Mohammed Essamilghi, Sumayyah Ghayth, Ala Khaled, Wegden Ibrahim almagrouk khalel, Tesneem Layas Randa Alamen M. Sharif, Enas Soula, Sara Abobaker Tantush, Ahmed Tarek, Hazem Ahmed, Dafer Abdulkhakim S. Zreeg (Tripoli Medical Centre); Abdulsalam Abuajaila, Ma'aly Ahuhlaiga, Mabrouka Alfoghy, Fakhruddin Almuzghi, Hasan Alost, Fatima Mousa, Saddam Ali Rmali (Misrata Medical Center, Misurata); Abubakar Abdelmalik, Hajir Aljabo, Ahmed Altaweel, Mohammad Annajjar, Lina Ali Arrmalli, Asma Aljenofi, Abdelaziz Deyab, Weam Drah, Abdallah Elayeb, Fathi Elzowawi, Yousef Krayem (Assafwa International Hospital, Misurata); Hana Milad Bazozzi, Mohamed Tumi (Alaml Specialised Hospital, Misurata); Abdullahn Abdousalam Elkaloush, Ali Alnaer, Mohammed Meftah Alglaib, Habib Mansour Murtadi, Sara Trainba, Aisha Shaklawoon, Hisham Swessi (Dar Alhekma Hospital); Ali Alnaeri, Sondas Ali Gargum, Hamassat Mustufa, Hawa Ahmed Shalluf, Aya Essam Shnishah, Sara Ali Tarniba (Asalam, Misurata); Hajer Ali Shokri (Asalam Hospital); Ahmed Elhadi, Taher L. Sarkaz, Osama Tababa (Ghout El-Shaal Specialized Hospital).

*Macedonia:* Aleksandra Gavrilovska-Brzanov, Laze Jovcheski, Marjan Kamilovski, Vesna Cvetanovska Naunova, Toni Risteski (University Clinic for pediatric surgery Skopje).

*Malaysia:* Dayang Anita Abdul Aziz, Ainal Huda Abu Bakar, Shareena Ishak, Zarina Abdul Latiff, Felicia Lim, Marjmin Osman, Siti Farhan Moh Pauzi, Rufinah Teo, Azrina SK Zaman (Hospital Canselor Tuanku Muhriz, UKM Medical Centre); Tammy Teoh Han Qi (Penang General Hospital); Mohd Fitri Shukri bin Mohamed Adanan, Mohd Yusof bin Abdullah, Zulfetri bin Md Hassan, Wang Junyi, Abhirami Lechmiannandan, Mohd Yusran Bin Othman, Cheah Hui Shan, Hafatin Fairos bt Tamaddun, Zakaria bin Zahari (Hospital Kuala Lumpur); Mohd Razin bin Hassan, Tarmizi Mohd Nor, Wan Ruzaimie Noor (Hospital Raja Perempuan Zainab II, Kota Bharu, Kelantan); Noor Fa'izatul Rahil Ambok Dalek, Hidayah Hayati binti Hashim, Ahmad Zulhisyam bin Zarwawi (Hospital Sultanah Nur Zahirah, Kuala Terengganu, Terengganu); Ahmad Shafiee bin Bujarimin, Jessmine Anntinea a/p Anthony Dass, Hemasutha a/p Kannessan, Najua binti Ramli, V Muthualhagi M Vellusamy, Quah Soong Yuen (Hospital Sultanah Aminah, Johor Bharu, Johor); Siti Nur Aien binti Hamid Hamzah, Nur Atiqah binti Mohd Hanifah, Keily Wong Yue Jyun, Hazlina Mohd Khalid, Nur Atifah binti Mohd Naim, Rahilah binti Abd Razak (Hospital Wanita dan Kanak-Kanak, Likas, Sabah).

*México:* Eduardo Bracho Blanchet, Daniel Ibarra, Antonio Calderon Moore, Roberto Dávila Perez, Emilio Fernandez Portilla, Raúl Villegas Silva, Cristian R. Zalles Vidal (Hospital Infantil de México Federico Gomez); Bruno Martinez-Leo, Cesar Carrasco-Ortega (Moctezuma Children's Hospital, México City); Monica Noguez Castillo, Doriela Herappe Mellado (Hospital de Especialidades del niño y mujer de Querétaro); Luis Fernando Gonzalez Cortez, Rafael Santana Ortiz, Jamie Orozco Perez, Guillermo Yanowsky Reyes (Antiguo Hospital Civil de Guadalajara "Fray Antonio Alcalde"); Moises Quiles Corona, Jorge Román Corona-Rivera, Izabel Maryalexandra Rios Flores, Lucina Bobadilla Morales, Christian Peña Padilla, Alfredo Corona Rivera, Cristian Irela Aranda Sánchez, Juan Jose Cardenas Ruiz Velasco (Nuevo Hospital Civil de Guadalajara Dr. Juan I. Menchaca, Guadalajara); Gabriela Ambriz-Gonzalez, Nestor Martinez Hernandez Magro, Francisco Javier Leon Frutos, Jose de Jesus Cardenas Baron, Alejandro González Ojeda, Yesica Yarza (Pediatric Hospital, Western Medical Center, Mexican Institute of Social Security); Pastor Aguirre-Lopez, Juan Domingo Porras, Rafael Valerio-Vazquez (Hospital del Niño Poblano, San Andres Cholula); Lorenzo Juvencio Caamal, Jose Manuel Diaz Gomez, Humberto Garcia Martinez, David Bulnes Mendizabal, Arturo Marin Montalvo, Vicente Sánchez Paredes, Pablo Sanchez Valladares (Child Hospital Dr. Rodolfo Nieto Padrón, Villahermosa Tabasco).

*Nigeria:* Mohammad Aminu Mohammad, Nwachukwu Calistus, Anyanwu Lofty-John Chukwuemeka, Abdullahi Lawalbarau (Amino Kano Teaching Hospital); Efeturi Agelebe, Emmanuel Akinlabi Ajao, Adebayo Gbenga Tanimola (Bowen University Teaching Hospital); Moruf Adekunle Abdulsalam, Titiloye Hannah



Agboola, Olalekan Temitope Ajai, Omolara Moronkeji Faboya, Roland Iheanyichukwu Osuoji, Bolarinwa Bolanle Temilade, Omolara Williams (Lagos State University Teaching Hospital); Adesoji Ademuyiwa, Felix Alakaloko, Christopher Bode, Olumide Abiodun Elebute, George Iheduwa, Oluwaseun Ladipo-Ajayi, Kayode Olayade, Justina Seyi-Olajide (Lagos University Teaching Hospital); Nurudeen Abdulraheem, Rilwan Adegboyega, Opeoluwa Adesanya, Olalekan S. Ajiboye, Anuoluwapo Aremo, Florence Dedeke, Moses Olanrewaju (Federal Medical Centre, Abeokuta); Auwal M Abubakar, Ahmed Bamanga, Cyril Cletus, Lateef Oyebanji, Adewale Oyinloye, Ibrahim Shehu (Federal Medical Centre, Yola); Sani Adamu, Abubakar M. Ballah, David C. Nwosu, Michael Felix, Iliya Jalo, Kalakwa A. Mohammed, Aliu Rasaki, Yahya S. Alkali, Yusuf T. Sambo, Faruk Suleiman (Federal Teaching Hospital, Gombe); Emmanuel Ameh, Eze Chukwuemeka Ejinkeonye, Matthias Igoche, Amsa B. Mairami, Osagie O Olabisi, Maryrose Osazuwa, Adekunle T. Otuneye, Morayo Monsurat Salawu, Mariya Mukhtar Yola (National Hospital, Abuja); Efeturi Agelebe, Emmanuel Akinlabi Ajao, Adebayo Gbenga Tanimola (Bowen University Teaching Hospital); Ugwunne Chuka A., Victor Modekwe, Philip Mari Mshelbwala, Osuigwe Andrew N., Olabisi Osagie, Ekwunife Hyginus O., Ugwu Jideofor O., Samson Olori, Ezidiegwu Ugochukwu S. (Nnamdi Azikiwe University Teaching Hospital); Nwokoro Collins, Ogundele Ibukunolu, Amo Shonubi (Olabisi Onabanjo University Teaching Hospital); Ifeanyichukwu Kelvin Egbuchulem, Felix O. Kumolalo, Taiwo Lawal, Olakayode Ogundoyin, Dare I. Olulana, Ikechukwu Ulasi (University College Hospital, Ibadan); Samson Olori, Olabisi Osagie, Philip Mari Mshelbwala (University of Abuja Teaching Hospital); Ekpemo, Christopher Chim Amah, Isaac Chukwu, Sebastian Okwuchukwu Ekenze, Emmanuel Ifeanyi Nwangwu, Elochukwu Perpetua Nwankwo, Nene Elsie Obianyo, Ezomike Uchechukwu Obiora (University of Nigeria Teaching Hospital).

*Pakistan:* Muhammad Arshad, Sohail Dogar, Ayesha Saleem (Aga Khan University Hospital, Karachi); Nadeem Akhter, Hassan Ali, Ali Raza Chaudary, Muhammad Amjad Chaudhry, Mudassir Fayaz Gondal, Muhammad Bin Amjad, Muhammad Umer Jamal, Safina Karim, Muhammad Adnan Khan Khattak, Uzma Mumtaz, Muhammad Umar Nisar, Ghuri Shankar Pandit, Rafee Raza (Children's Hospital, PIMS, and Shaheed Zulfiqar Ali Bhutto Medical University, Islamabad); Hana Arbab, Lubna Samad, Aqil Soomro (Indus Hospital, Karachi); Muhammad Kashif Bashir, Fatima Naumeri, Zarqa Rani, Muhammad Sharif (King Edward Medical University, Lahore); Muhammad Arshad, Taimur Qureshi, Hina Yousuf (Liaquat National Hospital); Naveed Haider, Soban Hameed, Imran Hashim, Muhammad Bilal Mirza, Wajeel ur Rehman, Muhammad Saleem, Nabila Talat (The Children's Hospital & The institute of Child Health, Lahore).

*Palestine, Gaza:* Hala M. Al-Attar, Adham Ashraf AbuAttaya, Mohammed A. M. Aldirawi, Sharif S. Alijla, Haya Abdunnasser Ali Alshaikhkhalil, Sulaiman T. Alzerei, Yara shareef Ashour, Ahmed S Darwish, Yasmin Mohammed Khalil Abu Jamie, Mohamed Anwer El Tallaa, Bisan D. M. Wishah, Nidal Wishah (Al-Aqsa Hospital, Gaza Strip); Walaa Almadhoun, Ashraf Ayman Al-Salhi, Soha Marwan Salem Alwadia, Dina Ayman Ashour, Nagham Mohammed Al Dammagh, Abdalkarim Yhya Hammato, Doaa Khalil Hasanain, Mustafa abu jayyab, Samy Rafat Ramadan Naim, Ismail Nassar, Anas Qawwash, Jamal Mohammed Salim, Ahmad Ashraf Shaheen, Eman Abu Shiha (Al-Shifa Hospital, Gaza Strip); Nasrallah Ashraf Al Massry, Abdulwhhab Ayman Abu Alamrain, Khaled Alnahhal, Mohammed Alser, Samar H. Al-Shwaikh, Hisham Dalloul, Aya Mahmoud Elmzyyen, Omar Adly ElShaer, Jehad Fares, Amir Talat Sheda Ghabayen, Najlaa Abu Jamie, Najlaa Abu Jamie, Walaa Lubbad, Ayoub A. Nemer, Aya Azmi Shehda Salha, Nureddin Shaheen (European Gaza Hospital, Gaza Strip); Sharif Alijla (Islamic University of Gaza, Gaza).

*Palestine, West Bank:* Fawzi Abu-Nejmah, Firas Alqarajeh, Tareq Z. Alzughayyar, Hadeel Awad, Jomana Madieh, Osaid Shaher Shabana (Ahli Hospital, Hebron); Raghad Mohammad Abdu Alkareem, Tasneem Fathi Hasan Almusleh, Yazid Yousef Mahmoud Atatri, Wisam Baker, Yasmeen Z. Qwaider, Adly Halabi, Raghad Abdullateef Lahlooh, Mahmoud Fuad Sbaih, Abdulraheem Adnan Abdulraheem Tahyneh (Jenin Government Hospital, Jenin); Abrar Ghassan Balousha, Mohammad Omar Mohammad Abdelhafez, Yara Ajrami, Hasan Subhi Hasan Abu Al-saleem, Ainaa Ata Mohammad Alzamari, Basheer Ba'baa', Muath A. M. Baniowda, Ammar Darwish, Abu Farha, Ahmad G. Hammouri, Majd Yousef Mohammed Hassan, Nathan Novotny, Abrar Shaheen Schwiell, Mohammed Shehada, Mervat Sufian, Bashar Yaghi (Palestinian Medical Complex, Ramallah); Rami Anwar Misk, Safa' Jamal Abatli, Ahmad Abueideh, Ali Abdelhay Abumunshar, Hiba Al-Tammam, Firas Anaya, Hasan Arafat, Muath Abdelrahem Fuad Assi, Abd Al-Naser Bany Odi, Doha Mustafa Saleh Beshtawi, Dania Jaber, Yara Imad Omar KayedLara Zahi Adel Khatatba, Asef Belal Qadomi, Fadwa Sharabati (Rafidia Surgery Hospital, Nablus); Ihda Adawi, Samer Adawi, Mohammad Omar Ibrahim Alqor, Asmahan Mohammad Suliman alzeer, Ahmad Samih Arar, Osama Majed Darras, Annan Ebeido, Ihsan Ghazzawi, ma'alem sameer hajajreh, Sharehan Joubeh, AbdelRazzaq Abu Mayaleh, Mahmoud M. Qabaja, Moradallah Asad Fahmi Qunaibi, Yasmeen Ahmad Samarah, Mutassem Sharabati, Dua Hasan Yaghi (Red Crescent Society, Hebron).

*Papua New Guinea:* Jack Mulu (Port Moresby General Hospital).

*Peru:* Francisco Lapouble-Ramirez, Genaro Llap-Unchón, Florangel Patricia Delgado Malaga (Cayetano Heredia National Hospital, Lima); María Rosa Ortiz Argomedo, Victor Casquero, Sthefanny Vega Centeno (Guillermo Almenara National Hospital, Lima); Cathy Alanguia, Loreley Raquel Cardenas Alva, Nancy Rossana Mendoza Leon, Maria Susana Loo Neyra, Cintya Maria de Jesus Torres Picón, Natalia Huaytalla Quiroz (Hospital Dos de Mayo, Lima Flor de Maria Diaz Castañeda); Waldo Berrocal Anaya, Patricia Chavez Galvez, Prince Pamela Aguilar Gargurevich, Carmen Guisse, Erika Ramos Paredes (Hospital Nacional Alberto Sabogal Sologuren); Carlos Segura Calle, Danny Dominguez, Jenny Arauco (Hospital Nacional Docente Madre Niño San Bartolomé); Luis Ormeño Calderón, Cesar Diaz Leon, Joan Elizabeth Gutierrez Maldonado, Ximena Guilardi Silva, Miriam Daniela Fernandez Wilson (Hospital Nacional Edgardo Rebagliati Martins); Marlene Diaz Echegaray, Isidora Garcia, Fernando Trigoso Mori, Veronica Raquel Cañapataña Sahuanay, Lily Saldaña (Instituto Nacional de Salud del Niño); Karina Hernández Córdova, Faye Aguilar Aguilar, Lenny Flores Carbajal, Carlos Mendoza Chiroque, Raul Ramirez De La Cruz, Gladys Johana Sulca Cruzado, Patricia Paredes Espinoza, Natalia Tovar Gutierrez, Jose Luis Apaza Leon, Angel Samanez Obeso, Juan Jose Mendoza Oviedo, Luz Mery Brito Quevedo, Edgar Fernando Delgado Quinteros, Jennifer Sotelo Sanchez, Carolina Paz Soldan (Instituto Nacional de Salud de Nino de San Borja); Porfirio Rivera Altamirano, Julio Rivera Alvarez, Rocio Anicama Elias, Juan Jose Salinas Barreto, Juan Pedro Vasquez Matos, Cesar Torres Miranda, Andrea Gutarra Palomino, Jesmarina Ledesma Peraza, Fernando Ayque Rosas, Jackelyne Alvarado Zelada (Instituto Nacional Materno Perinatal); Segundo Gamboa Kcomt, Luis Ortego Sotelo, Araceli Villalba Villalba (Pediatric Emergencies Hospital, Lima).

*Philippines:* Beda Espineda, Johann de Guzman, Raisa Yu (Philippine Children's Medical Center, Quezon City).

*Romania:* Calin Calancea, Bogdan Gavrilă, Aurel Mironescu, Liviu Muntean, Adrian Papa, Roxana Verdeata, Lucian Vida (Children Clinical Hospital of Brasov, Brasov/University of Brasov); Vlad Coşoreanu, Sebastian Ionescu, Monica Ivanov, Andreea Madalina Serban (Marie Curie Hospital in Bucharest).

*Serbia:* Ivona Djordjevic, Ana Kostic, Maja Raicevic, Andjelka Slavkovic, Dragoljub Zivanovic (Clinical Centre for Paediatric Surgery and Orthopaedics, Clinical Center Niš); Marija Lukac, Milan Slavkovic, Miona Stojanovic, Djordje Toplicic (University Children's Hospital in Belgrade).

*South Africa:* Sanele Madziba, Hansraj Mangray, Shamaman Harilal (Greys Hospital, Pietermaritzburg); Cecilia Rengura, David Tasker, Thozama Siyotula, Marion Arnold, Dirk von Delft, Uzair Jooma, Omar Khamag, Akhona Mbonisweni, Elmarie vd Merwe (Red Cross War Memorial Children's Hospital, Cape Town); Corné de Vos, Delphine Nkuliza, Daniel Sidler, Guigui Sikwete (Tygerberg Children's Hospital).

*Sri Lanka:* Benedict Paul Bright, Tharanga Gamage, Naveen Wijekoon (Lady Ridgeway hospital for children, Colombo).

*Sudan:* Alaa Abdulrahman, Ahmad Elian Abu Ajwa, Enas Musa Ismail, Sawazen Malik, Ola Ahmed Abdulmjeed Mohammed, Mohammed Salah, Mahmoud Saleh (Khartoum University Hospital).

*Syria:* Ahmad Alhamid, Ahmadfateh Assi, Mohammad Mohannad Batal, Vivian Faks, Mohammed Morjan, Ahmad Mouakeh, Mohamad Bassel Mouti, Ahmad Sankari Tarabishi (Aleppo University Hospital, Aleppo); AOs Alhamid, Ziad Aljarad, Mohammed Morjan (AlShahbaa Hospital, Aleppo city).

*Thailand:* Jiraporn Khorana (Faculty of Medicine, Chiang Mai University); Sirima Liukitithara. Anan Srinuworn (Hatyai hospital); Ratiyaporn Phannua, Patchareeporn Tanming, Kanokrat Thaiwatcharamas (Faculty of Medicine, Khon Kaen University); Wannisa Poocharoen (Queen Sirikit National Institute of Child Health (QSNICH)); Ampaipan Boonthai (Faculty of Medicine, Ramathibodi Hospital, Bangkok); Monawat Ngermcham (Faculty of Medicine, Siriraj Hospital); Wasun Nuntasunti (Sisaket Hospital).

*Tunisia:* Roua Abdelmoumen, Nahla Kchich, Lassaad Sahnoun (Fattouma Bourguiba Hospital, Monastir)

*Turkey:* Müge Çelik, İlknur Banlı Cesur, Hatice Kaya, Gökmen Kurt, Mustafa Kurthan Mert, Zerrin Özçelik (Adana State Training Hospital); Seçil Erçin, Egemen Eroğlu (Amerikan Hospital, Istanbul); Fatih Akova, Mehmet Pasaoglu (Biruni University Hospital, Istanbul); M.Eren Akan, Merve Altın, Merve Aykut, Ali

Canözer, Melisa Erdem, Ebru Ergenekon, Ramazan Karabulut, Elif Eren, Elif Keleş, Teymursha Muradi, Kıvanç Şeref, Kaan Sönmez, Zafer Türkyılmaz, Canan Türkyılmaz, Ali Yalcinkaya, Aslı Öztürk Yeniay, (Gazi University School of Medicine Yakup Aslan, Ahmet Beşir, Hatice Sonay Yalçın Cömert, Şükran Geze, Mustafa İmamoglu, Şebnem Kader, Mehmet Mutlu, Bahanur Çekiç Haluk Sarihan (Karadeniz Technical University, Trabzon); Emrah Aydın, Elif Demirtas, Egemen Eroğlu, Tuğba Gursoy, Mehmet Ali Ozen, Alkim Yıldırım (Koç University, Istanbul); Nazile Erturk, Nilay Hakan, Suleyman Cuneyt Karakus, Alev Suzen (Muğla Education and Research Hospital).

*Uzbekistan:* Shukurali Eshkabilov (Republican Perinatal Center); Avazjon Dekhkonboev, Aliev Makhmudjan Muslimovich, Rustam Z. Yuldashev (Republican Specialized Scientific Practical Medical Center of Pediatrics, Tashkent).

*Zambia:* Bruce Bvulani, Chisengo Kapihya, Azad Patel, Patricia Shinondo (University Teaching Hospital, Lusaka).

*Zimbabwe:* Nyasha Dirani, Andile Maqhawwe Dube, Gloria Mhuruyengwe, Mandlenkosi Ncube, Nyasha Ngoromani, Sodumisa Ngwenya, Privilege Sibanda (National University of Science and Technology, Mpilo Hospital).

### **High-income countries**

*Australia:* Kiera Roberts, Gordon Thomas, Rasika Naidoo, Soundappan Sannappa Venkatraman (Children's Hospital at Westmead); Brendan Jones (Gold Coast University Hospital); Nicholas Ensor, Damir Ljuhar, Ramesh Nataraja, Mithila Sivasubramaniam (Monash Children's Hospital); Matthew Jones, Sebastian King, Sharman Tan Tanny, Warwick Teague (The Royal Children's Hospital).

*Austria:* Georg Singer, Holger Till (Medical University of Graz).

*Belgium:* Martine Dassonville, Manon Pigeolet (Queen Fabiola University Children's Hospital).

*Brunei Darussalam:* Zahidah Adlynee Haji Ahmad, Anas Shikha, Win Sabai Phyu Win, Janice Wong (RIPAS Hospital).

*Canada:* Eileen Duggan, Sherif Emil, Elena Guadagno, Jean-Martin Laberge, Dan Poenaru, Pramod Puligandla, Nadia Safa, Kenneth Shaw, Etienne St-Louis, Hussein Wissanji (Montreal Children's Hospital); Ann Aspirot, Yousra-Imane Benaskeur, Louise Caouette-Laberge, Shahrzad Joharifard, Léamarie Meloche-Dumas, Nelson Piché, Dickens St-Vil (Sainte-Justine Children's Hospital).

*Chile:* Maria Consuelo Puentes, Carolina Mendez Benavente, Maricarmen Olivos Perez, Paola Osses Leal (San Juan de Dios Hospital).

*Czech Republic:* Ladislav Planka, Jan Škvařil (Fakultni Nemocnice BRNO); Radek Štichhauer, Antonín Šafus (University Hospital Hradec Kralove); Klára Berková, Lucie Pos, Tereza Racková, Michal Rygl, Barbora Trojanová (University Hospital Motol).

*England:* Felicity Arthur, Paul Losty (Alder Hey Children's Hospital); Marcia Abrunhosa Matias, Afnan Alzubair, Suren Arul, Oliver Gee, Ingo Jester, Tony Lander, Benjamin Martin, Max Pachl, Michael Singh, Giampiero Soccorso (Birmingham Children's Hospital); Kate Burns, Hannah Rhodes, Rebecca Roberts, Robin Garrett-Cox (Bristol Royal Hospital for Children) Alireza Keshtgar, Dorothy Kufeji, Simon McCluney, Caroline Pardy (Evelina Children's Hospital, Guy's & St. Thomas' NHS Trust); Hannah Cornwall, Kat Ford, Kokila Lakhoo, Niveshni Maistry, Krithi Ravi (John Radcliffe Hospital); Niyi Ade-Ajayi, Alex MacDonald, Shahad Sabti (King's College Hospital); Fraser Cameron, Amy Hughes Thomas, Merina Kurian, Jayaram Sivaraj, Jason Langley (Nottingham Children's Hospital); Thomas Middleton, Jonathan Sutcliffe (Leeds General Infirmary); Nigel J Hall, Arun Kelay (Southampton General Hospital); Kate Bradshaw, Ceri Jones, Dean Rex, Mark C Thomas (St. George's Hospital).

*France:* Elodie Haraux (CHU Amiens); Xavier Delforge (CHU Amiens-Picardie); Virginie Fouquet-Languillat, Florent Guerin, Géraldine Hery (CHU APHP-Bicêtre); Thomas Blanc, Aline Broch, Jules Kohaut (CHU APHP-Necker); Liza Ali, Arnaud Bonnard, Matthieu Peycelon (CHU APHP-Robert Debré); Thomas Defortrie, Luke Harper (CHU Bordeaux); Quentin Ballouhey, Laurent Fourcade, Céline Grosos (CHU Limoges); Maria

Giovanna Grella, Guillaume Levard, Benoit Parmentier (CHU Poitiers); Alexis Arnaud, Camille Duchesnes, Coralie Defert, Samia Laraqui Hossini, Caroline Le Gall (CHU Rennes); Lucie Grynberg, Mariette Renaux Petel (CHU Rouen); Aurelien Scalabre (CHU St Etienne); Olivier Abbo, Mélodie Juricic, Sofia Mouttalib (CHU Toulouse).

*Germany:* Udo Rolle, Andrea Schmedding (Frankfurt University Hospital); Peter Goebel, Ludwig Patzer, Anke Rissmann (Hospital St. Barbara Elisabeth Halle); Alexandra Antunez-Mora, Bernd Tillig, Sylvester von Bismarck, Alexandra Wilke (Kinderchirurgie Vivantes Neukölln); Christian Knorr, Patricia Reis Barbosa, Domitille Stark (Krankenhaus Barmherzige Brüder Regensburg); Anke Rissmann (Medical Faculty Otto-von-Guericke University Magdeburg); Judith Lindert (University Hospital Schleswig Holstein, Luebeck).

*Italy:* Luigi Avolio, Gian Battista Parigi, Marco Brunero, Silvia Cavaiuolo, Piero Giovanni Romano, Marinella Guazzotti, Francesco Manni, Matilde Molinelli, Noemi Pasqua, Alessandro Raffaele, Cristiana Riboni, Fabrizio Vatta (Fondazione IRCCS Policlinico San Matteo, Pavia).

*Hungary:* Laszlo Juhasz, Anna Rieth (Albert Szent-Györgyi Clinical Centre).

*Lithuania:* Rūta Dagilytė, Pranas Gurskas, Arunas Liubsys, Arunas Strumila, Gilvydas Verkauskas (Children's Hospital, Affiliate of Vilnius University Hospital SK); Vidmantas Barauskas, Mindaugas Berzanskis, Dalius Malcius, Agne Miknevičiute, Asta Vinskaite (Lithuanian University of Health Sciences).

*New Zealand:* Spencer Beasley, Lucy Goddard (Christchurch Hospital); Timothy Hall, James Hamill, Liam Vierboom (Starship Children's Hospital); Stephen Adams, Jitoko Cama, Sridharan Jayaratnam, Askar Kukkady, Udaya Samarakkody, Marilyn Wong (Waikato Hospital); Mark Stringer, Naveen Weeratunga (Wellington Hospital).

*Poland:* Piotr Kaliciński, Grzegorz Kowalewski, Anna Roszkiewicz, Agata Trypens (Children's Memorial Health Institute, Warsaw); Stefan Anzelewicz, Piotr Czauderna, Hanna Garnier, Marta Osowicka, Dariusz Wyrzykowski (Medical University of Gdańsk, Gdańsk); Tomasz Koszutski, Szymon Tobor, Agnieszka Wolny (Medical University of Silesia, Katowice); Andrzej Grabowski, Wojciech Korlacki, Michal Pasierbek (Department of Children's Developmental Defects Surgery and Traumatology Medical University of Silesia, Zabrze); Aneta Piotrowska, Przemysław Wolak (Wladyslaw Buszkowski Children's Hospital, Kielce); Sylwester Gerus, Dariusz Patkowski, Krystian Tozczewski (Wroclaw Medical University).

*Qatar:* Mansour Ali, Amer Alsaied, David Sigalet (Sidra Medecine, Doha).

*Saudi Arabia:* Reem Abdelbaqi, Khalid Alattas, Ameen Alsaggaf, Ahmed Atta, Mohamed Fayeze, Alaa Ghallab, Yar Kano, Yazeed Owiji, Enaam Raboe, Hanin Shalaby, Omar Sindi, Asaad Saleh Radwan, Ali Zeinelabdeen, Mazen Zidan (King Fahd Armed Forces Hospital); Mohammad Almosaibli, Abdullah Alshehri, Tariq Altokhais, Fahad Alturki (King Saud University College of Medicine).

*Scotland:* Dasha Krisanova, Gregor Walker (Royal Hospital for Children, Glasgow); Wisam Abbas, Philip Hammond (Royal Hospital for Sick Children).

*Singapore:* Candy SC Choo, Doris Mae Dimatatac, Shireen Anne Nah (KK Women's and Children's Hospital).

*South Korea:* In ji Hwang, Ju Yeon Lee, Eung Song Song (Cheonnam National University Hospital); Sanghoon Lee, Joonhyuk Son (Samsung Medical Center); Hyun-Young Kim, Hee-Beom Yang, Joong Kee Youn (Seoul National University Children's Hospital); Jae Hee Chung, Seok Hyeon Cho (Seoul St. Mary's Hospital, The Catholic University of Korea).

*Spain:* Isabel Casal Beloy, Miriam García (Complejo Hospitalario Universitario de A Coruña (CHUAC)); Verónica Alonso, Isabel Carrillo, Oscar Gomez, Alberto Sanchez, Maria Elena Molina Vazquez (Hospital Clinico Universitario de Valladolid); Paolo Bragagnini, Mercedes Ruiz de Temiño Bravo, Alexander Siles Hinojosa, Segundo Rite (Hospital Universitario Miguel Servet); Detlef Oliu San Miguel (Maternal Hospital Infantil De Badajoz); Jenny Arboleda, Eva Blazquez-Gomez, Luis Garcia-Aparicio, Martí Iriondo, Jordi Prat, Xavier Tarrado (Hospital Sant Joan de Déu).

*Sweden:* Carmen Mesas Burgos, Muaad Hussien, Tomas Wester (Astrid Lindgrens Children's Hospital); Kate Abrahamsson, Michaela Dellenmark Blom, Vladimir Gatzinsky (Queen Silvia Children's Hospital); Helena

Arnadóttir, Christina Granéli, Emma Grotting, Lars Hagander, Erik Omling, Martin Salö, Emma Svensson (Skåne University Hospital's Pediatric Care Hospital).

*Uruguay:* Daniel Borbonet, Fabiola Ruth Castedo Camacho, Gaston Acuña, Helena Sobrero, Vinicio Jimenez Morejon, Paul Puglia, (Centro Hospitalario Pereira Rossell).

*United States of America:* Fizan Abdullah, Monica Langer, Jonathan Vacek (Ann & Robert H. Lurie Children's Hospital of Chicago); Jonathan Chan (Beaumont Hospital in Detroit); Pavan Brahmamdam, Karen Sherer, Alan Tom (Beaumont Childrens Hospital in Royal Oak); Reto Baertschiger, Laura Herrera, Mary Leech (Children's Hospital at Dartmouth); Afua Amoabin, Alex Bowder, Terry Derks, Brooke Pinar, Sabina M Siddiqui (Children's Hospital of Wisconsin); Lauren Camp, Jeremy Chang, Kathryn Fowler, Ankush Gosain, Erica Hodgman, Bailey D. Lyttle, Lydia McColl Makepeace, Sara Mansfield, Maria Mora, Regan Williams (Le Bonheur Children's Hospital Memphis); Hira Ahmad, Marc Levitt (Nationwide Children's Hospital); Julie Khlevner, William Middlesworth, Kelly Naranjo (New York Presbyterian Morgan Stanley Children's Hospital); Marilyn Butler, Aaron Cunningham, Brandy Gonzales, Sanjay Krishnaswami (Oregon Health and Science University); Jodie Greenberg, Katrine Løfberg, Kate Davenport (Phoenix Children's Hospital); Sarah Fox, Samir Gadepalli, April Hamilton, Stephanie Johnson, Mercedes Pilkington (University of Michigan, Ann Arbor); Jenna Kylene Davis, Nicole Lin, Juan Sola, Yang Yaom, Stephen S. Burks (University of Miami); Murad Almasri, John Coon, Marianelly Fernandez Ferrer, Joann Gonzalez, Medhavi Honhar, Sergio Ierma, Sunil Jain, Varun Modi (University of Texas Medical Branch); Chukwubinyelum Amaechi, Alana Beres, Luke J. Dosselman, Jillian Jacobson, Mark N. Pernik (UT Southwestern Medical Center, Children's Medical Center of Dallas); Maija Cheung, Griffin Coghill, Nensi Ruzgar, Sarah Ullrich (Yale New Haven Hospital).

## Supplementary Methods 1: Sample size calculation

A sample size calculation was undertaken using Stata/IC 15.0 based on Bonferroni correction for multiple testing, assuming 80% power and an overall type 1 error of 5% (Methods Table 1). This was calculated for the primary outcome of mortality in low- and middle-income countries (LMICs) compared to high-income countries (HICs) and also low, middle and high-income countries (LM&HICs) separately. Mortality estimations utilised in the calculation were based on pooled data from published studies of these conditions in LM&HICs respectively at the time of protocol development as referenced in the first column.

**Methods Table 1: Estimated mortality and sample sizes for low, middle and high-income countries and the mean number of cases per month per hospital globally**

| Condition                                         | Mortality LIC (% , n) | Mortality MIC (% , n) | Mortality LMIC combined (% , n) | Mortality HIC (% , n) | Sample size for LIC | Sample size for MIC | Sample size for HIC | Sample size for LMIC vs HIC (per group) | Mean no. cases/ month/ hospital (L,M&HIC combined) |
|---------------------------------------------------|-----------------------|-----------------------|---------------------------------|-----------------------|---------------------|---------------------|---------------------|-----------------------------------------|----------------------------------------------------|
| Oesophageal atresia <sup>1-18</sup>               | 79.5% (62/78)         | 41.8% (623/1488)      | 43.7% (685/1566)                | 2.7% (6/221)          | 34                  | 34                  | 23                  | 21                                      | 1.02                                               |
| Congenital diaphragmatic hernia* <sup>19-27</sup> | -                     | 47.4% (130/274)       | 47.4% (130/274)                 | 20.4% (201/982)       | -                   | -                   | -                   | 63                                      | 0.54                                               |
| Intestinal atresia <sup>28-38</sup>               | 42.9% (42/98)         | 40.0% (97/241)        | 41.0% (139/339)                 | 2.9% (12/407)         | 6014                | 6014                | 25                  | 24                                      | 0.63                                               |
| Gastroschisis <sup>1,39-54</sup>                  | 83.1% (211/254)       | 42.6% (205/481)       | 56.6% (416/735)                 | 3.7% (28/748)         | 29                  | 29                  | 24                  | 15                                      | 0.85                                               |
| Exomphalos <sup>1,55-66</sup>                     | 25.5% (41/161)        | 31.9% (132/414)       | 30.1% (173/575)                 | 12.7% (40/316)        | 1040                | 1040                | 196                 | 115                                     | 0.63                                               |
| Anorectal malformation <sup>1,39,17,67-76</sup>   | 26.3% (26/99)         | 17.5% (243/1391)      | 18.1% (269/1490)                | 3% (14/462)           | 460                 | 460                 | 90                  | 85                                      | 1.34                                               |
| Hirschsprung's Disease <sup>77-80</sup>           | 19.1% (33/173)        | 16.8% (55/328)        | 17.6% (88/501)                  | 2.3% (43/1897)        | 5802                | 5802                | 85                  | 79                                      | 2.21                                               |

\*Representative data on the mortality from congenital diaphragmatic hernia in LICs is not currently available. HIC: High-income countries. IQR: Interquartile range. LMIC: Low- and middle-income countries. LIC: Low-income countries. MIC: Middle-income countries.

Based on the patient numbers included in the previously undertaken PaedSurg Africa study, which utilised a similar study design, the estimated sample sizes to detect a significant difference in mortality between LMICs and HICs in this study are achievable. During the PaedSurg Africa study, data was collected by 220 local investigators across 76 hospitals in 23-countries in sub-Saharan Africa (SSA) for the same study duration (7-months) and included 188 patients with anorectal malformation and 111 with gastroschisis. Since this study is global rather than limited to SSA we predicted that the patient numbers would exceed this.

Based on the limited data available from LMICs, it did not appear to be feasible to detect significant differences in mortality between LICs and MICs for intestinal atresia, exomphalos, anorectal malformation and Hirschsprung's disease; congenital diaphragmatic hernia was unknown since there was no reliable data from LICs. Hence, analysis was planned between HICs and LMICs unless sufficient data was collected to detect significant differences in mortality between LM&HICs, separately.

### Estimated study population

The mean number of cases presenting to a hospital per month for each study condition was estimated from published studies across all income settings; most institutions caring for patients with these conditions receive 1-2 new cases per month (Methods Table 1). Hence, each participating hospital was expected to have approximately 7-14 cases to include in the study per month.

We aimed to include a minimum of 365 months of data; 183 months from LMICs and 183 months from HICs. This was to ensure enough cases of exomphalos to determine a significant difference between LMICs and HICs; fewer months of data were required to determine significant differences in mortality for the other study conditions. This translated to data collection by 365 hospitals for 1-month each or data collection by 52 hospitals for 7-months each or a variant in between (i.e 100 hospitals for 3-4 months each). An up-to-date total of patient numbers was included on the study website ([www.globalpaedsurg.com](http://www.globalpaedsurg.com)) so that local investigators could work together towards this target.

## References

1. Farmer D, Sitkin N, Lofberg K, Donkor P, Ozgediz D. Surgical Interventions for Congenital Anomalies. In: Debas HT, Donkor P, Gawande A, Jamison DT, Kruk ME, Mock CN, eds. *Essential Surgery: Disease Control Priorities, Third Edition (Volume 1)*. Washington (DC); 2015.
2. Roberts K, Karpelowsky J, Fitzgerald DA, Soundappan SS. Outcomes of oesophageal atresia and tracheo-oesophageal fistula repair. *J Paediatr Child Health* 2016; **52**(7): 694-8.
3. Yang YF, Dong R, Zheng C, et al. Outcomes of thoracoscopy versus thoracotomy for esophageal atresia with tracheoesophageal fistula repair: A PRISMA-compliant systematic review and meta-analysis. *Medicine (Baltimore)* 2016; **95**(30): e4428.
4. Agarwala S, Bhatnagar V, Bajpai M, Gupta DK, Mitra DK. Factors contributing to poor results of treatment of esophageal atresia in developing countries. *Pediatr Surg Int* 1996; **11**(5-6): 312-5.
5. Fall M, Mbaye PA, Horace HJ, et al. Oesophageal atresia: Diagnosis and prognosis in Dakar, Senegal. *Afr J Paediatr Surg* 2015; **12**(3): 187-90.
6. Nwosu JN, Onyekwulu FA. Oesophageal atresia and tracheoesophageal fistula: a 12 years experience in a developing nation. *Niger J Med* 2013; **22**(4): 295-8.
7. Osei-Nketiah S, Hesse AA, Appeadu-Mensah W, Glover-Addy H, Etwire VK, Sarpong P. Management of oesophageal atresia in a developing country: Is primary repair forbidden? *Afr J Paediatr Surg* 2016; **13**(3): 114-9.
8. Adebayo OA. Oesophageal atresia and tracheo-oesophageal fistula: review of a 10-year personal experience. *West Afr J Med* 1990; **9**(3): 164-9.
9. Anwar ul H, Ubaidullah, Akhter N, et al. Factors affecting survival in patients with oesophageal atresia and tracheo-oesophageal fistula. *J Ayub Med Coll Abbottabad* 2009; **21**(4): 129-33.
10. Randriamizao HMR, Rakotondrainibe A, Rahanitriniaina NMP, Rajaonera AT, Andriamanarivo ML. [Intraoperative management of esophageal atresia: small steps that cannot be ignored in Madagascar]. *Pan Afr Med J* 2017; **27**: 9.
11. Singh A, Bajpai M, Bhatnagar V, Agarwala S, Srinivas M, Sharma N. Effect of number of associated anomalies on outcome in oesophageal atresia with or without tracheoesophageal fistula patient. *Afr J Paediatr Surg* 2013; **10**(4): 320-2.
12. Zhang Z, Huang Y, Su P, Wang D, Wang L. Experience in treating congenital esophageal atresia in China. *J Pediatr Surg* 2010; **45**(10): 2009-14.
13. Niramis R, Tangkhabuanbut P, Anuntkosol M, Buranakitjaroen V, Tongsin A, Mahatharadol V. Clinical outcomes of esophageal atresia: comparison between the Waterston and the Spitz classifications. *Ann Acad Med Singapore* 2013; **42**(6): 297-300.
14. Narasimman S, Nallusamy M, Hassan S. Review of oesophageal atresia and tracheoesophageal fistula in hospital sultanah bahiyah, alor star. Malaysia from january 2000 to december 2009. *Med J Malaysia* 2013; **68**(1): 48-51.
15. Bouguermouh D, Salem A. Esophageal atresia: a critical review of management at a single center in Algeria. *Dis Esophagus* 2015; **28**(3): 205-10.
16. Upadhyaya VD, Gangopadhyaya AN, Gupta DK, et al. Prognosis of congenital tracheoesophageal fistula with esophageal atresia on the basis of gap length. *Pediatr Surg Int* 2007; **23**(8): 767-71.
17. Tefera E, Tekla T, Derbew M. Neonatal gastrointestinal surgical emergencies: a 5- year review in a teaching hospital Addis Ababa, Ethiopia. *Ethiop Med J* 2007; **45**(3): 251-6.
18. Sharma AK, Shukla AK, Prabhakar G, Sarin YK, Sharma CS. Esophageal atresia: tragedies and triumphs over two decades in a developing country. *Int Surg* 1993; **78**(4): 311-4.
19. Long AM, Bunch KJ, Knight M, Kurinczuk JJ, Losty PD, Baps C. Early population-based outcomes of infants born with congenital diaphragmatic hernia. *Arch Dis Child Fetal Neonatal Ed* 2018.
20. Logan JW, Rice HE, Goldberg RN, Cotten CM. Congenital diaphragmatic hernia: a systematic review and summary of best-evidence practice strategies. *J Perinatol* 2007; **27**(9): 535-49.
21. Emam SM, Kamel KH. Influence of pulmonary hypertension on outcome of Egyptian patients with congenital diaphragmatic hernia: an experience in low-resource settings. *J Egypt Soc Parasitol* 2012; **42**(2): 405-16.
22. Numanoglu A, Morrison C, Rode H. Prediction of outcome in congenital diaphragmatic hernia. *Pediatr Surg Int* 1998; **13**(8): 564-8.
23. Ozdogan T, Durakbasa C, Mutus M, Iscen M. Congenital diaphragmatic hernia: a 4-year experience in a single centre. *Afr J Paediatr Surg* 2010; **7**(2): 105-6.
24. Garcia AM, Machicado S, Gracia G, Zarante IM. Risk factors for congenital diaphragmatic hernia in the Bogota birth defects surveillance and follow-up program, Colombia. *Pediatr Surg Int* 2016; **32**(3): 227-34.
25. Rohana J, Boo NY, Thambidorai CR. Early outcome of congenital diaphragmatic hernia in a Malaysian tertiary centre. *Singapore Med J* 2008; **49**(2): 142-4.
26. Dehdashtian M, Bashirnejad S, Malekian A, Aramesh MR, Aletayeb MH. Seasonality, Epidemiology and Outcome of Congenital Diaphragmatic Hernia in South West of Iran. *J Neonatal Surg* 2017; **6**(2): 28.
27. Bhat YR, Kumar V, Rao A. Congenital diaphragmatic hernia in a developing country. *Singapore Med J* 2008; **49**(9): 715-8.
28. Burjonrappa S, Crete E, Bouchard S. Comparative outcomes in intestinal atresia: a clinical outcome and pathophysiology analysis. *Pediatr Surg Int* 2011; **27**(4): 437-42.
29. Gupta S, Gupta R, Ghosh S, et al. Intestinal Atresia: Experience at a Busy Center of North-West India. *J Neonatal Surg* 2016; **5**(4): 51.
30. Dalla Vecchia LK, Grosfeld JL, West KW, Rescorla FJ, Scherer LR, Engum SA. Intestinal atresia and stenosis: a 25-year experience with 277 cases. *Arch Surg* 1998; **133**(5): 490-6; discussion 6-7.
31. Chirdan LB, Uba AF, Pam SD. Intestinal atresia: management problems in a developing country. *Pediatr Surg Int* 2004; **20**(11-12): 834-7.
32. Cairo S, Kakembo N, Kisa P, et al. Disparity in access and outcomes for emergency neonatal surgery: intestinal atresia in Kampala, Uganda. *Pediatr Surg Int* 2017; **33**(8): 907-15.
33. Cox SG, Numanoglu A, Millar AJ, Rode H. Colonic atresia: spectrum of presentation and pitfalls in management. A review of 14 cases. *Pediatr Surg Int* 2005; **21**(10): 813-8.
34. Khan N, Bakht S, Zabeer N. A Minor Innovation in Constructing a Small Bowel Stoma in Neonates with Small Bowel Atresia to Reduce the Morbidity. *J Neonatal Surg* 2016; **5**(4): 45.
35. Ameh EA, Nmadu PT. Intestinal atresia and stenosis: a retrospective analysis of presentation, morbidity and mortality in Zaria, Nigeria. *West Afr J Med* 2000; **19**(1): 39-42.
36. Barrack SM, Kyambi JM, Ndungu J, Wachira N, Anangwe G, Safwat S. Intestinal atresia and stenosis as seen and treated at Kenyatta National Hospital, Nairobi. *East Afr Med J* 1993; **70**(9): 558-64.
37. Ekwunife OH, Oguejiofor IC, Modekwe VI, Osuigwe AN. Jejuno-ileal atresia: a 2-year preliminary study on presentation and outcome. *Niger J Clin Pract* 2012; **15**(3): 354-7.
38. Krishna A, Murali MV, Ahuja S, Kaur N. Factors influencing survival in esophageal atresia. *Indian Pediatr* 1994; **31**(1): 80-3.

39. PaedSurg Africa Research Collaboration. Paediatric Surgery across Sub-Saharan Africa: A Multi-Centre Prospective Cohort Study. <https://clinicaltrials.gov/ct2/show/NCT03185637> (Accessed 31st May 2018).
40. Bradnock T, Marven S, Owen A, et al. Gastroschisis: one year outcomes from national cohort study. *BMJ* 2011; **343**(d6749).
41. Askarpour S, Ostadian N, Javaherizadeh H, Chabi S. Omphalocele, gastroschisis: epidemiology, survival, and mortality in Imam Khomeini hospital, Ahvaz-Iran. *Pol Przegl Chir* 2012; **84**(2): 82-5.
42. Sekabira J, Hadley GP. Gastroschisis: a third world perspective. *Pediatr Surg Int* 2009; **25**(4): 327-9.
43. Wesonga AS, Fitzgerald TN, Kabuye R, et al. Gastroschisis in Uganda: Opportunities for improved survival. *J Pediatr Surg* 2016; **51**(11): 1772-7.
44. Apfeld JC, Wren SM, Macheke N, et al. Infant, maternal, and geographic factors influencing gastroschisis related mortality in Zimbabwe. *Surgery* 2015; **158**(6): 1475-80.
45. Allotey J, Davenport M, Njere I, et al. Benefit of preformed silos in the management of gastroschisis. *Pediatr Surg Int* 2007; **23**: 1065-9.
46. Ameh EA, Chirdan LB. Ruptured exomphalos and gastroschisis: a retrospective analysis of morbidity and mortality in Nigerian children. *Pediatr Surg Int* 2000; **16**(1-2): 23-5.
47. Weil BR, Leys CM, Rescorla FJ. The jury is still out: changes in gastroschisis management over the last decade are associated with both benefits and shortcomings. *J Pediatr Surg* 2012; **47**(1): 119-24.
48. Lansdale N, Hill R, Gull-Zamir S, et al. Staged reduction of gastroschisis using preformed silos: practicalities and problems. *J Pediatr Surg* 2009; **44**(11): 2126-9.
49. Ford K, Poenaru D, Moulot O, et al. Gastroschisis: Bellwether for neonatal surgery capacity in low resource settings? *J Pediatr Surg* 2016; **51**(8): 1262-7.
50. Du L, Pan WH, Cai W, Wang J, Wu YM, Shi CR. Delivery room surgery: an applicable therapeutic strategy for gastroschisis in developing countries. *World J Pediatr* 2014; **10**(1): 69-73.
51. Erdogan D, Azili MN, Cavusoglu YH, et al. 11-year experience with gastroschisis: factors affecting mortality and morbidity. *Iran J Pediatr* 2012; **22**(3): 339-43.
52. Manson J, Ameh E, Canvassar N, et al. Gastroschisis: a multi-centre comparison of management and outcome. *Afr J Paediatr Surg* 2012; **9**(1): 17-21.
53. Saranrittichai S. Gastroschisis: delivery and immediate repair in the operating room. *J Med Assoc Thai* 2008; **91**(5): 686-92.
54. Abdur-Rahman LO, Abdulrasheed NA, Adeniran JO. Challenges and outcomes of management of anterior abdominal wall defects in a Nigerian tertiary hospital. *Afr J Paediatr Surg* 2011; **8**(2): 159-63.
55. Sakonidou S, Ali K, Farmer I, Hickey A, Greenough A. Mortality and short-term morbidity in infants with exomphalos. *Pediatr Int* 2018.
56. Hsu CC, Lin SP, Chen CH, et al. Omphalocele and gastroschisis in Taiwan. *Eur J Pediatr* 2002; **161**(10): 552-5.
57. Conner P, Vejde JH, Burgos CM. Accuracy and impact of prenatal diagnosis in infants with omphalocele. *Pediatr Surg Int* 2018.
58. Kouame BD, Dick RK, Ouattara O, et al. [Therapeutic approaches for omphalocele in developing countries: experience of Central University Hospital of Yopougon, Abidjan, Cote d'Ivoire]. *Bull Soc Pathol Exot* 2003; **96**(4): 302-5.
59. Osifo OD, Ovuenu ME, Evbuomwan I. Omphalocele management using goal-oriented classification in African centre with limited resources. *J Trop Pediatr* 2011; **57**(4): 286-8.
60. Kong JY, Yeo KT, Abdel-Latif ME, et al. Outcomes of infants with abdominal wall defects over 18years. *J Pediatr Surg* 2016; **51**(10): 1644-9.
61. Groves R, Sunderajan L, Khan AR, Parikh D, Brain J, Samuel M. Congenital anomalies are commonly associated with exomphalos minor. *J Pediatr Surg* 2006; **41**(2): 358-61.
62. Na Q, Liu C, Cui H, Zhang Z, Yin S, Li Q. Immediate repair compared with delayed repair of congenital omphalocele: short-term neonatal outcomes in China. *J Int Med Res* 2011; **39**(6): 2344-51.
63. Tarca E, Aprodu S. Past and present in omphalocele treatment in Romania. *Chirurgia (Bucur)* 2014; **109**(4): 507-13.
64. Kante L, Togo A, Diakite I, et al. [Omphalocele in general and pediatric surgery in Gabriel Toure]. *Mali Med* 2010; **25**(3): 23-6.
65. Ngom G, Fall I, Sankale AA, et al. [Evaluation of the management of omphalocele at Dakar]. *Dakar Med* 2004; **49**(3): 203-6.
66. Sabetay C, Plesea E, Ferschin A, Sabetay E, Stoica A, Singer I. [Follow-up evaluation of omphalocele treatment in children. The experience of the department of Pediatric Surgery and Orthopedics No.1 University Hospital Craiova]. *Chirurgia (Bucur)* 2001; **96**(2): 177-85.
67. Rintala RJ, Pakarinen MP. Imperforate anus: long- and short-term outcome. *Semin Pediatr Surg* 2008; **17**(2): 79-89.
68. Haider N, Fisher R. Mortality and morbidity associated with late diagnosis of anorectal malformations in children. *Surgeon* 2007; **5**(6): 327-30.
69. Ekenze SO, Ibeziako SN, Ezomike UO. Trends in neonatal intestinal obstruction in a developing country, 1996-2005. *World J Surg* 2007; **31**(12): 2405-9; discussion 10-1.
70. Chirdan LB, Uba FA, Ameh EA, Mshelbwala PM. Colostomy for high anorectal malformation: an evaluation of morbidity and mortality in a developing country. *Pediatr Surg Int* 2008; **24**(4): 407-10.
71. Chowdhary SK, Chalapathi G, Narasimhan KL, et al. An audit of neonatal colostomy for high anorectal malformation: the developing world perspective. *Pediatr Surg Int* 2004; **20**(2): 111-3.
72. Govender S, Wiersma R. Delayed diagnosis of anorectal malformations (ARM): causes and consequences in a resource-constrained environment. *Pediatr Surg Int* 2016; **32**(4): 369-75.
73. Ameh EA, Chirdan LB. Neonatal intestinal obstruction in Zaria, Nigeria. *East Afr Med J* 2000; **77**(9): 510-3.
74. Mirza B, Ijaz L, Saleem M, Sharif M, Sheikh A. Anorectal malformations in neonates. *Afr J Paediatr Surg* 2011; **8**(2): 151-4.
75. Lukong CS, Ameh EA, Mshelbwala PM, et al. Management of anorectal malformation: Changing trend over two decades in Zaria, Nigeria. *Afr J Paediatr Surg* 2011; **8**(1): 19-22.
76. Archibong AE, Idika IM. Results of treatment in children with anorectal malformations in Calabar, Nigeria. *S Afr J Surg* 2004; **42**(3): 88-90.
77. Bradnock TJ, Knight M, Kenny S, Nair M, Walker GM, British Association of Paediatric Surgeons Congenital Anomalies Surveillance S. Hirschsprung's disease in the UK and Ireland: incidence and anomalies. *Arch Dis Child* 2017; **102**(8): 722-7.
78. Liem NT, Hau BD. One-stage operation for Hirschsprung's disease: experience with 192 cases. *Asian J Surg* 2008; **31**(4): 216-9.
79. Pini Prato A, Rossi V, Avanzini S, Mattioli G, Disma N, Jasonni V. Hirschsprung's disease: what about mortality? *Pediatr Surg Int* 2011; **27**(5): 473-8.
80. Taguchi T, Obata S, Ieiri S. Current status of Hirschsprung's disease: based on a nationwide survey of Japan. *Pediatr Surg Int* 2017; **33**(4): 497-504.



**Supplementary Table 1: Characteristics, perioperative care, surgical interventions, and outcomes for patients with oesophageal atresia**

| Variable                                                                                | Total<br>(n=560) | HIC<br>(n=141) | MIC<br>(n=412) | LIC<br>(n=7) | P value      |
|-----------------------------------------------------------------------------------------|------------------|----------------|----------------|--------------|--------------|
| <b>Patient Characteristics:</b>                                                         |                  |                |                |              |              |
| Median gestational age at birth (IQR), weeks                                            | 37 (4)           | 37 (4)         | 37 (2)         | 38 (2)       | 0.621        |
| Median age at presentation (IQR), hours                                                 | 19 (46)          | 5 (20)         | 24 (68)        | 144 (200)    | <0.001       |
| Sex:                                                                                    |                  |                |                |              |              |
| Male                                                                                    | 314 (56.1%)      | 91 (64.5%)     | 223 (54.1%)    | 0 (0.0%)     | <0.001       |
| Female                                                                                  | 242 (43.2%)      | 50 (35.5%)     | 186 (45.1%)    | 6 (85.7%)    | -            |
| Ambiguous                                                                               | 4 (0.7%)         | 0 (0.0%)       | 3 (0.7%)       | 1 (14.3%)    | -            |
| Median weight at presentation (IQR), kg                                                 | 2.5 (0.9)        | 2.5 (1.0)      | 2.5 (0.8)      | 2.2 (1.2)    | 0.778        |
| Does the patient have another anomaly in addition to the study condition?               |                  |                |                |              |              |
| Yes: Cardiovascular                                                                     | 268 (47.9%)      | 70 (49.6%)     | 195 (47.3%)    | 3 (42.9%)    | 0.862        |
| Yes: Respiratory                                                                        | 44 (7.9%)        | 11 (7.8%)      | 32 (7.8%)      | 1 (14.3%)    | 0.817        |
| Yes: Gastrointestinal                                                                   | 72 (12.9%)       | 22 (15.6%)     | 50 (12.1%)     | 0 (0.0%)     | 0.337        |
| Yes: Neurological                                                                       | 28 (5.0%)        | 13 (9.2%)      | 15 (3.6%)      | 0 (0.0%)     | <b>0.027</b> |
| Yes: Genito-urinary                                                                     | 70 (12.5%)       | 28 (19.9%)     | 42 (10.2%)     | 0 (0.0%)     | <b>0.007</b> |
| Yes: Musculoskeletal                                                                    | 62 (11.1%)       | 24 (17.0%)     | 38 (9.2%)      | 0 (0.0%)     | <b>0.025</b> |
| Yes: Down syndrome                                                                      | 9 (1.6%)         | 3 (2.1%)       | 6 (1.5%)       | 0 (0.0%)     | 0.813        |
| Yes: Beckwith Wiedemann syndrome                                                        | 0 (0.0%)         | 0 (0.0%)       | 0 (0.0%)       | 0 (0.0%)     | -            |
| Yes: Cystic fibrosis                                                                    | 1 (0.2%)         | 0 (0.0%)       | 1 (0.2%)       | 0 (0.0%)     | 0.835        |
| Yes: Chromosomal                                                                        | 20 (3.6%)        | 10 (7.1%)      | 10 (2.4%)      | 0 (0.0%)     | <b>0.032</b> |
| Yes: Other                                                                              | 40 (7.1%)        | 14 (9.9%)      | 26 (6.3%)      | 0 (0.0%)     | 0.270        |
| No                                                                                      | 198 (35.4%)      | 45 (31.9%)     | 149 (36.2%)    | 4 (57.1%)    | 0.316        |
| Median distance from patient's home to hospital (IQR), km*                              | 30 (95)          | 17 (92)        | 31 (106)       | 92 (165)     | <b>0.026</b> |
| Type of delivery:                                                                       |                  |                |                |              |              |
| Vaginal (spontaneous)                                                                   | 222 (39.6%)      | 53 (37.6%)     | 163 (39.6%)    | 6 (85.7%)    | <b>0.002</b> |
| Vaginal (induced)                                                                       | 32 (5.7%)        | 15 (10.6%)     | 17 (4.1%)      | 0 (0.0%)     | -            |
| Caesarean section (elective)                                                            | 145 (25.9%)      | 22 (15.6%)     | 123 (29.9%)    | 0 (0.0%)     | -            |
| Caesarean section (urgent/non-elective)                                                 | 157 (28.0%)      | 51 (36.2%)     | 105 (25.5%)    | 1 (14.3%)    | -            |
| Unknown                                                                                 | 3 (0.5%)         | 0 (0.0%)       | 3 (0.7%)       | 0 (0.0%)     | -            |
| Missing                                                                                 | 1 (0.2%)         | 0 (0.0%)       | 1 (0.2%)       | 0 (0.0%)     | -            |
| Was the patient septic on arrival to your hospital?                                     |                  |                |                |              |              |
| Yes                                                                                     | 124 (22.1%)      | 10 (7.1%)      | 110 (26.7%)    | 4 (57.1%)    | <0.001       |
| No                                                                                      | 436 (77.9%)      | 131 (92.9%)    | 302 (73.3%)    | 3 (42.9%)    | -            |
| Was the patient hypovolaemic on arrival to your hospital?                               |                  |                |                |              |              |
| Yes                                                                                     | 77 (13.8%)       | 12 (8.5%)      | 64 (15.5%)     | 1 (14.3%)    | 0.112        |
| No                                                                                      | 483 (86.3%)      | 129 (91.5%)    | 348 (84.5%)    | 6 (85.7%)    | -            |
| Was the patient hypothermic on arrival to your hospital?                                |                  |                |                |              |              |
| Yes                                                                                     | 69 (12.3%)       | 5 (3.5%)       | 60 (14.6%)     | 4 (57.1%)    | <0.001       |
| No                                                                                      | 490 (87.5%)      | 136 (96.5%)    | 351 (85.2%)    | 3 (42.9%)    | -            |
| Missing                                                                                 | 1 (0.2%)         | 0 (0.0%)       | 1 (0.2%)       | 0 (0.0%)     | -            |
| American Society of Anaesthesiologists (ASA) Score at the time of primary intervention: |                  |                |                |              |              |
| 1. Healthy person                                                                       | 55 (9.8%)        | 11 (7.8%)      | 44 (10.7%)     | 0 (0.0%)     | <0.001       |
| 2. Mild systemic disease                                                                | 168 (30.0%)      | 32 (22.7%)     | 136 (33.0%)    | 0 (0.0%)     | -            |
| 3. Severe systemic disease                                                              | 166 (29.6%)      | 58 (41.1%)     | 105 (25.5%)    | 3 (42.9%)    | -            |
| 4. Severe systemic disease that is a constant threat to life                            | 100 (17.9%)      | 32 (22.7%)     | 66 (16.0%)     | 2 (28.6%)    | -            |
| 5. A moribund patient who is not expected to survive without the operation              | 31 (5.5%)        | 2 (1.4%)       | 29 (7.0%)      | 0 (0.0%)     | -            |
| Not applicable - no intervention                                                        | 37 (6.6%)        | 4 (2.8%)       | 31 (7.5%)      | 2 (28.6%)    | -            |
| Missing                                                                                 | 3 (0.5%)         | 2 (1.4%)       | 1 (0.2%)       | 0 (0.0%)     | -            |
| What study condition does the patient have?                                             |                  |                |                |              |              |
| Oesophageal atresia                                                                     | 560 (100.0%)     | 141 (100.0%)   | 412 (100.0%)   | 7 (100.0%)   | -            |
| Congenital diaphragmatic hernia                                                         | 1 (0.2%)         | 1 (0.7%)       | 0 (0.0%)       | 0 (0.0%)     | 0.226        |
| Intestinal atresia                                                                      | 18 (3.2%)        | 7 (5.0%)       | 11 (2.7%)      | 0 (0.0%)     | 0.365        |
| Gastroschisis                                                                           | 0 (0.0%)         | 0 (0.0%)       | 0 (0.0%)       | 0 (0.0%)     | -            |
| Exomphalos/Omphalocele                                                                  | 3 (0.5%)         | 1 (0.7%)       | 2 (0.5%)       | 0 (0.0%)     | 0.934        |
| Anorectal malformation                                                                  | 53 (9.5%)        | 10 (7.1%)      | 42 (10.2%)     | 1 (14.3%)    | <b>0.504</b> |
| Hirschsprung's Disease                                                                  | 0 (0.0%)         | 0 (0.0%)       | 0 (0.0%)       | 0 (0.0%)     | -            |
| Type of OA +/- TOF (Gross classification)                                               |                  |                |                |              |              |
| Without a fistula                                                                       | 47 (8.4%)        | 14 (9.9%)      | 33 (8.0%)      | 0 (0.0%)     | 0.147        |
| Proximal TOF, distal OA                                                                 | 10 (1.8%)        | 4 (2.8%)       | 5 (1.2%)       | 1 (14.3%)    | -            |
| Distal TOF with proximal OA                                                             | 476 (85.0%)      | 114 (80.9%)    | 356 (86.4%)    | 6 (85.7%)    | -            |
| Proximal and distal TOF                                                                 | 8 (1.4%)         | 4 (2.8%)       | 4 (1.0%)       | 0 (0.0%)     | -            |
| H-type TOF without OA                                                                   | 19 (3.4%)        | 5 (3.6%)       | 14 (3.4%)      | 0 (0.0%)     | -            |
| Long or short gap?                                                                      |                  |                |                |              |              |
| Long                                                                                    | 111 (19.8%)      | 26 (18.4%)     | 85 (20.6%)     | 0 (0.0%)     | <0.001       |
| Short                                                                                   | 375 (67.0%)      | 99 (70.2%)     | 275 (66.8%)    | 1 (14.3%)    | -            |
| Unknown                                                                                 | 74 (13.2%)       | 16 (11.4%)     | 52 (12.6%)     | 6 (85.7%)    | -            |
| Pneumonia at presentation?                                                              |                  |                |                |              |              |
| Yes: diagnosed clinically                                                               | 100 (17.9%)      | 3 (2.1%)       | 91 (22.1%)     | 6 (85.7%)    | <0.001       |
| Yes: diagnosed radiologically                                                           | 86 (15.4%)       | 3 (2.1%)       | 83 (20.1%)     | 0 (0.0%)     | -            |
| Yes: other means of diagnosis                                                           | 0 (0.0%)         | 0 (0.0%)       | 0 (0.0%)       | 0 (0.0%)     | -            |
| No: patient born in the study centre                                                    | 123 (22.0%)      | 47 (33.3%)     | 76 (18.4%)     | 0 (0.0%)     | -            |
| No: patient born outside the study centre but no evidence of pneumonia on arrival       | 251 (44.8%)      | 88 (62.4%)     | 162 (39.3%)    | 1 (14.3%)    | -            |

|                                                                                                          |             |             |             |            |        |
|----------------------------------------------------------------------------------------------------------|-------------|-------------|-------------|------------|--------|
| Did the patient have tracheomalacia?                                                                     |             |             |             |            |        |
| Yes: diagnosed clinically                                                                                | 34 (6.1%)   | 11 (7.8%)   | 23 (5.6%)   | 0 (0.0%)   | 0.505  |
| Yes: diagnosed on bronchoscopy                                                                           | 38 (6.8%)   | 21 (14.9%)  | 17 (4.3%)   | 0 (0.0%)   | <0.001 |
| Yes: diagnosed on CT                                                                                     | 0 (0.0%)    | 0 (0.0%)    | 0 (0.0%)    | 0 (0.0%)   | -      |
| Yes: diagnosed on bronchogram                                                                            | 2 (0.4%)    | 1 (0.7%)    | 1 (1.0%)    | 0 (0.0%)   | 0.716  |
| Yes: other method of diagnosis                                                                           | 0 (0.0%)    | 0 (0.0%)    | 0 (0.0%)    | 0 (0.0%)   | -      |
| No                                                                                                       | 486 (87.0%) | 108 (76.6%) | 371 (90.0%) | 7 (100.0%) | <0.001 |
| <b>Care prior to presentation at the paediatric surgery centre:</b>                                      |             |             |             |            |        |
| Antenatal ultrasound undertaken?                                                                         |             |             |             |            |        |
| Yes: study condition diagnosed                                                                           | 65 (11.6%)  | 20 (14.2%)  | 45 (10.9%)  | 0 (0.0%)   | <0.001 |
| Yes: problem identified but study condition not diagnosed                                                | 126 (22.5%) | 52 (36.9%)  | 73 (17.7%)  | 1 (14.3%)  | -      |
| Yes: no problem identified                                                                               | 289 (51.6%) | 58 (41.1%)  | 226 (54.9%) | 5 (71.4%)  | -      |
| No                                                                                                       | 79 (14.1%)  | 11 (7.8%)   | 67 (16.3%)  | 1 (14.3%)  | -      |
| Missing                                                                                                  | 1 (0.2%)    | 0 (0.0%)    | 1 (0.2%)    | 0 (0.0%)   | -      |
| Median gestational age of study condition diagnosis if diagnosis was antenatal (IQR), weeks              | 29 (8)      | 29.5 (11)   | 29 (6)      | -          | 0.293  |
| Mode of transport to hospital:                                                                           |             |             |             |            |        |
| Ambulance                                                                                                | 314 (56.1%) | 85 (60.3%)  | 225 (54.6%) | 4 (57.1%)  | <0.001 |
| Other transport provided by the health service                                                           | 39 (7.0%)   | 10 (7.1%)   | 28 (6.8%)   | 1 (14.3%)  | -      |
| Patient's own transport                                                                                  | 73 (13.0%)  | 2 (1.4%)    | 69 (16.8%)  | 2 (28.6%)  | -      |
| Born within the hospital                                                                                 | 133 (23.8%) | 44 (31.2%)  | 89 (21.6%)  | 0 (0.0%)   | -      |
| Missing                                                                                                  | 1 (0.2%)    | 0 (0.0%)    | 1 (0.2%)    | 0 (0.0%)   | -      |
| If outborn, where did the patient present from?                                                          |             |             |             |            |        |
| Home                                                                                                     | 17 (4.0%)   | 1 (1.0%)    | 15 (4.7%)   | 1 (14.3%)  | 0.019  |
| Community Clinic/General Practice                                                                        | 66 (15.5%)  | 5 (5.2%)    | 59 (18.3%)  | 2 (28.6%)  | -      |
| District Hospital                                                                                        | 338 (79.3%) | 90 (92.8%)  | 244 (75.8%) | 4 (57.1%)  | -      |
| From another country                                                                                     | 1 (0.2%)    | 0 (0.0%)    | 1 (0.3%)    | 0 (0.0%)   | -      |
| From a different speciality within the hospital                                                          | 1 (0.2%)    | 1 (1.0%)    | 0 (0.0%)    | 0 (0.0%)   | -      |
| Unknown                                                                                                  | 3 (0.7%)    | 0 (0.0%)    | 3 (0.9%)    | 0 (0.0%)   | -      |
| <b>Perioperative care at the paediatric surgery centre:</b>                                              |             |             |             |            |        |
| If septic, were appropriate antibiotics administered?                                                    |             |             |             |            |        |
| Yes within 1 hour of arrival                                                                             | 100 (80.6%) | 7 (70.0%)   | 91 (82.7%)  | 2 (50.0%)  | 0.407  |
| Yes within the first day of arrival                                                                      | 23 (18.5%)  | 3 (30.0%)   | 18 (16.4%)  | 2 (50.0%)  | -      |
| No                                                                                                       | 1 (0.8%)    | 0 (0.0%)    | 1 (0.9%)    | 0 (0.0%)   | -      |
| If hypovolaemic, was an intravenous fluid bolus given?                                                   |             |             |             |            |        |
| Yes within 1 hour of arrival                                                                             | 56 (72.7%)  | 5 (41.7%)   | 51 (79.7%)  | 0 (0.0%)   | <0.001 |
| Yes within the first day of arrival                                                                      | 19 (24.7%)  | 7 (58.3%)   | 12 (18.8%)  | 0 (0.0%)   | -      |
| No                                                                                                       | 2 (2.6%)    | 0 (0.0%)    | 1 (1.6%)    | 1 (100.0%) | -      |
| If hypovolaemic, how much intravenous fluid was given?                                                   |             |             |             |            |        |
| 10 - 20mls/kg                                                                                            | 57 (76.0%)  | 8 (66.7%)   | 49 (77.8%)  | 0 (0.0%)   | 0.409  |
| Above 20mls/kg                                                                                           | 18 (24.0%)  | 4 (33.3%)   | 14 (22.2%)  | 0 (0.0%)   | -      |
| If hypothermic, was the patient warmed on arrival to your hospital to within a normal temperature range? |             |             |             |            |        |
| Yes                                                                                                      | 64 (92.8%)  | 5 (100.0%)  | 55 (91.7%)  | 4 (100.0%) | 0.667  |
| No                                                                                                       | 5 (7.2%)    | 0 (0.0%)    | 5 (8.3%)    | 0 (0.0%)   | -      |
| Did the patient receive central venous access?                                                           |             |             |             |            |        |
| Yes: umbilical catheter                                                                                  | 74 (13.2%)  | 30 (21.3%)  | 44 (10.7%)  | 0 (0.0%)   | 0.003  |
| Yes: peripherally inserted central catheter (PICC)                                                       | 179 (32.0%) | 60 (42.6%)  | 119 (28.9%) | 0 (0.0%)   | 0.002  |
| Yes: percutaneously inserted central line with ultrasound guidance                                       | 92 (16.4%)  | 42 (29.8%)  | 50 (12.1%)  | 0 (0.0%)   | <0.001 |
| Yes: surgically placed central line (open insertion)                                                     | 60 (10.7%)  | 2 (1.4%)    | 58 (14.1%)  | 0 (0.0%)   | <0.001 |
| No                                                                                                       | 195 (34.8%) | 23 (16.3%)  | 165 (40.1%) | 7 (100%)   | <0.001 |
| Median total duration of antibiotics following primary intervention (IQR), days                          | 7 (12)      | 5 (6)       | 10 (11)     | 0 (3)      | <0.001 |
| Did the patient receive a blood transfusion?                                                             |             |             |             |            |        |
| Yes: not cross-matched.                                                                                  | 11 (2.0%)   | 3 (2.1%)    | 8 (1.9%)    | 0 (0.0%)   | <0.001 |
| Yes: cross-matched.                                                                                      | 246 (43.9%) | 36 (25.5%)  | 208 (50.5%) | 2 (28.6%)  | -      |
| No: not required.                                                                                        | 295 (52.7%) | 100 (70.9%) | 190 (46.1%) | 5 (71.4%)  | -      |
| No: it was required but not available.                                                                   | 7 (1.3%)    | 1 (0.7%)    | 6 (1.5%)    | 0 (0.0%)   | -      |
| Missing                                                                                                  | 1 (0.2%)    | 1 (0.7%)    | 0 (0.0%)    | 0 (0.0%)   | -      |
| Did the patient require ventilation?                                                                     |             |             |             |            |        |
| Yes and it was given                                                                                     | 475 (84.8%) | 137 (97.2%) | 338 (82.0%) | 0 (0.0%)   | <0.001 |
| Yes, but it was not available                                                                            | 14 (2.5%)   | 0 (0.0%)    | 10 (2.4%)   | 4 (57.1%)  | -      |
| No                                                                                                       | 71 (12.7%)  | 4 (2.8%)    | 64 (15.5%)  | 3 (42.9%)  | -      |
| Median time patient remained on ventilation if given (IQR), days                                         | 5 (6)       | 5 (5)       | 5 (7)       | -          | 0.578  |
| Median time to first enteral feed (post-primary intervention) (IQR), days                                | 6 (6)       | 5 (5)       | 6 (6)       | 10 (0)     | 0.060  |
| Median time to full enteral feeds (post-primary intervention) (IQR), days                                | 12 (11)     | 12 (12)     | 12 (11)     | -          | 0.977  |
| Median time to first oral feed post-operatively (IQR), days                                              | 7 (6)       | 8 (5)       | 7 (6)       | -          | 0.654  |
| Median time to full oral feeds (IQR), days                                                               | 14 (12)     | 15 (21)     | 14 (10)     | -          | 0.031  |
| Did the patient require parenteral nutrition?                                                            |             |             |             |            |        |
| Yes and it was given                                                                                     | 398 (71.1%) | 122 (86.5%) | 276 (67.0%) | 0 (0.0%)   | <0.001 |
| Yes and it was sometimes available, but less than required                                               | 14 (2.5%)   | 0 (0.0%)    | 14 (3.4%)   | 0 (0.0%)   | -      |
| Yes, but it was not available                                                                            | 23 (4.1%)   | 0 (0.0%)    | 19 (4.6%)   | 4 (57.1%)  | -      |
| No                                                                                                       | 125 (22.3%) | 19 (13.5%)  | 103 (25.0%) | 3 (42.9%)  | -      |
| Median time patient received parenteral nutrition if received (IQR), days                                | 12 (10)     | 12 (13)     | 12 (9)      | -          | 0.468  |
| If the patient had a primary oesophageal anastomosis, was a post-operative oesophagogram undertaken?     |             |             |             |            |        |
| Yes                                                                                                      | 272 (71.2%) | 93 (84.5%)  | 179 (65.8%) | 0 (0.0%)   | <0.001 |
| No                                                                                                       | 110 (28.8%) | 17 (15.5%)  | 93 (34.2%)  | 0 (0.0%)   | -      |
| If yes, routine or clinically indicated?                                                                 |             |             |             |            |        |

|                                                                                                                              |             |             |             |           |        |
|------------------------------------------------------------------------------------------------------------------------------|-------------|-------------|-------------|-----------|--------|
| Routine                                                                                                                      | 234 (86.0%) | 85 (91.4%)  | 149 (83.2%) | 0 (0.0%)  | 0.066  |
| Clinically indicated                                                                                                         | 38 (14.0%)  | 8 (8.6%)    | 30 (16.8%)  | 0 (0.0%)  | -      |
| Median number of days until post-operative oesophagogram undertaken, if undertaken (IQR)                                     | 7 (3)       | 7 (3)       | 7 (2)       | -         | 0.335  |
| Result of post-operative oesophagogram:                                                                                      |             |             |             |           |        |
| Leak                                                                                                                         | 52 (19.2%)  | 14 (15.1%)  | 38 (21.3%)  | 0 (0.0%)  | 0.212  |
| No leak                                                                                                                      | 219 (80.8%) | 79 (84.9%)  | 140 (78.7%) | 0 (0.0%)  | -      |
| For patients diagnosed with a leak radiologically, was it associated with clinical symptoms?                                 |             |             |             |           |        |
| Yes                                                                                                                          | 35 (68.6%)  | 11 (78.6%)  | 24 (64.9%)  | 0 (0.0%)  | 0.346  |
| No                                                                                                                           | 16 (31.4%)  | 3 (21.4%)   | 13 (35.1%)  | 0 (0.0%)  | -      |
| <b>Surgical intervention:</b>                                                                                                |             |             |             |           |        |
| Primary intervention:                                                                                                        |             |             |             |           |        |
| Oesophageal anastomosis                                                                                                      | 385 (68.8%) | 110 (78.0%) | 275 (68.6%) | 0 (0.0%)  | <0.001 |
| TOF ligation                                                                                                                 | 341 (60.9%) | 106 (75.2%) | 235 (57.0%) | 0 (0.0%)  | <0.001 |
| Gastrostomy                                                                                                                  | 108 (19.3%) | 21 (14.9%)  | 84 (20.4%)  | 3 (42.9%) | 0.102  |
| Palliative care                                                                                                              | 50 (8.9%)   | 4 (2.8%)    | 42 (10.2%)  | 4 (57.1%) | <0.001 |
| Oesophagostomy                                                                                                               | 42 (7.5%)   | 3 (2.1%)    | 39 (9.5%)   | 0 (0.0%)  | 0.013  |
| Ligation of the distal oesophagus                                                                                            | 16 (2.9%)   | 0 (0.0%)    | 16 (3.9%)   | 0 (0.0%)  | 0.052  |
| Foker technique                                                                                                              | 4 (0.7%)    | 1 (1.0%)    | 3 (1.0%)    | 0 (0.0%)  | 0.975  |
| Fundoplication                                                                                                               | 0 (0.0%)    | 0 (0.0%)    | 0 (0.0%)    | 0 (0.0%)  | -      |
| Gastro-oesophageal disconnection                                                                                             | 0 (0.0%)    | 0 (0.0%)    | 0 (0.0%)    | 0 (0.0%)  | -      |
| Other                                                                                                                        | 10 (1.8%)   | 3 (2.1%)    | 7 (7.7%)    | 0 (0.0%)  | 0.887  |
| Median time from arrival at your hospital to primary intervention (IQR), hours                                               | 35 (54)     | 23 (19)     | 48 (68)     | 96 (96)   | <0.001 |
| Surgical approach?                                                                                                           |             |             |             |           |        |
| Thoracotomy muscle cutting                                                                                                   | 212 (40.4%) | 37 (27.0%)  | 175 (45.6%) | 0 (0.0%)  | <0.001 |
| Thoracotomy muscle splitting                                                                                                 | 147 (28.0%) | 48 (35.0%)  | 98 (25.5%)  | 1 (25.0%) | -      |
| Thoracoscopy                                                                                                                 | 92 (17.5%)  | 39 (28.5%)  | 53 (13.8%)  | 0 (0.0%)  | -      |
| Laparotomy                                                                                                                   | 29 (5.5%)   | 6 (4.4%)    | 21 (5.5%)   | 2 (50.0%) | -      |
| Limited local incision                                                                                                       | 14 (2.7%)   | 2 (1.5%)    | 12 (3.1%)   | 0 (0.0%)  | -      |
| Laparoscopy                                                                                                                  | 3 (0.6%)    | 1 (0.7%)    | 2 (0.5%)    | 0 (0.0%)  | -      |
| Cervical approach                                                                                                            | 2 (0.4%)    | 1 (0.7%)    | 1 (0.3%)    | 0 (0.0%)  | -      |
| Not applicable/no intervention                                                                                               | 20 (3.8%)   | 1 (0.7%)    | 18 (4.7%)   | 1 (25.0%) | -      |
| Other                                                                                                                        | 1 (0.2%)    | 0 (0.0%)    | 1 (0.3%)    | 0 (0.0%)  | -      |
| Unknown                                                                                                                      | 5 (1.0%)    | 2 (1.5%)    | 3 (0.8%)    | 0 (0.0%)  | -      |
| If thoracoscopic/ laparoscopic, was the operation converted to open?                                                         |             |             |             |           |        |
| Yes                                                                                                                          | 10 (10.6%)  | 5 (12.5%)   | 5 (9.3%)    | 0 (0.0%)  | 0.614  |
| No                                                                                                                           | 84 (89.4%)  | 35 (87.5%)  | 49 (90.7%)  | 0 (0.0%)  | -      |
| What type of anaesthesia was used for the primary intervention?                                                              |             |             |             |           |        |
| General anaesthesia with endotracheal tube                                                                                   | 506 (90.4%) | 136 (96.5%) | 368 (89.3%) | 2 (28.6%) | <0.001 |
| Ketamine anaesthesia                                                                                                         | 2 (0.4%)    | 0 (0.0%)    | 1 (0.2%)    | 1 (14.3%) | -      |
| General anaesthesia with laryngeal airway                                                                                    | 1 (0.2%)    | 0 (0.0%)    | 1 (0.2%)    | 0 (0.0%)  | -      |
| Local anaesthesia only                                                                                                       | 1 (0.2%)    | 0 (0.0%)    | 1 (0.2%)    | 0 (0.0%)  | -      |
| No anaesthesia, just analgesia                                                                                               | 1 (0.2%)    | 1 (0.7%)    | 0 (0.0%)    | 0 (0.0%)  | -      |
| Spinal/caudal anaesthesia                                                                                                    | 0 (0.0%)    | 0 (0.0%)    | 0 (0.0%)    | 0 (0.0%)  | -      |
| No anaesthesia, no analgesia                                                                                                 | 0 (0.0%)    | 0 (0.0%)    | 0 (0.0%)    | 0 (0.0%)  | -      |
| Not applicable: no surgery or primary intervention undertaken.                                                               | 49 (8.8%)   | 4 (2.8%)    | 41 (10.0%)  | 4 (57.1%) | -      |
| Who undertook the anaesthetic for the primary intervention?                                                                  |             |             |             |           |        |
| Anaesthetic doctor                                                                                                           | 506 (90.4%) | 136 (96.5%) | 368 (89.3%) | 2 (28.6%) | <0.001 |
| Surgeon                                                                                                                      | 2 (0.4%)    | 0 (0.0%)    | 2 (0.5%)    | 0 (0.0%)  | -      |
| Anaesthetic nurse                                                                                                            | 1 (0.2%)    | 0 (0.0%)    | 1 (0.2%)    | 0 (0.0%)  | -      |
| Medical officer                                                                                                              | 1 (0.2%)    | 0 (0.0%)    | 0 (0.0%)    | 1 (14.3%) | -      |
| Other healthcare professional                                                                                                | 0 (0.0%)    | 0 (0.0%)    | 0 (0.0%)    | 0 (0.0%)  | -      |
| No anaesthetic undertaken                                                                                                    | 50 (8.9%)   | 5 (3.6%)    | 41 (10.0%)  | 4 (57.1%) | -      |
| Who undertook the primary intervention?                                                                                      |             |             |             |           |        |
| Paediatric surgeon (or junior with paediatric surgeon assisting/in the room)                                                 | 508 (90.7%) | 134 (95.0%) | 372 (90.3%) | 2 (28.6%) | <0.001 |
| General surgeon (or junior with general surgeon assisting/in the room)                                                       | 4 (0.7%)    | 3 (2.1%)    | 1 (0.2%)    | 0 (0.0%)  | -      |
| Trainee surgeon (without a paediatric or general surgeon assisting or in the room)                                           | 1 (0.2%)    | 0 (0.0%)    | 0 (0.0%)    | 1 (14.3%) | -      |
| Junior doctor, medical officer or other (without a paediatric or general surgeon assisting/in the room)                      | 0 (0.0%)    | 0 (0.0%)    | 0 (0.0%)    | 0 (0.0%)  | -      |
| Not applicable - no surgery or primary intervention undertaken.                                                              | 47 (8.4%)   | 4 (2.8%)    | 39 (9.5%)   | 4 (57.1%) | -      |
| Was a Surgical Safety Checklist used at the time of primary intervention?                                                    |             |             |             |           |        |
| Yes                                                                                                                          | 423 (75.5%) | 131 (92.9%) | 290 (70.4%) | 2 (28.6%) | <0.001 |
| No: but it was available                                                                                                     | 49 (8.8%)   | 4 (2.8%)    | 43 (10.4%)  | 2 (28.6%) | -      |
| No: it was not available                                                                                                     | 41 (7.3%)   | 2 (1.4%)    | 39 (9.5%)   | 0 (0.0%)  | -      |
| Not applicable: a conservative primary intervention was undertaken                                                           | 5 (0.9%)    | 0 (0.0%)    | 5 (1.2%)    | 0 (0.0%)  | -      |
| Not applicable: no surgery or primary intervention undertaken                                                                | 42 (7.5%)   | 4 (2.8%)    | 35 (8.5%)   | 3 (42.9%) | -      |
| For patients not receiving a primary oesophageal anastomosis, at what age is definitive surgery planned? Median months (IQR) | 3 (6)       | 3 (4)       | 3 (6)       | -         | 0.935  |
| For patients not receiving a primary oesophageal anastomosis, what is the future planned procedure?                          |             |             |             |           |        |
| Primary oesophageal anastomosis if possible                                                                                  | 66 (11.8%)  | 17 (12.1%)  | 48 (11.7%)  | 1 (14.3%) | 0.971  |
| Gap assessment                                                                                                               | 30 (5.4%)   | 6 (4.3%)    | 24 (5.8%)   | 0 (0.0%)  | 0.634  |
| Colonic interposition                                                                                                        | 20 (3.6%)   | 1 (0.7%)    | 19 (4.6%)   | 0 (0.0%)  | 0.086  |
| Gastric pull-up                                                                                                              | 18 (3.2%)   | 1 (0.7%)    | 17 (4.1%)   | 0 (0.0%)  | 0.124  |
| H fistula - no further intervention planned                                                                                  | 3 (0.5%)    | 2 (1.4%)    | 1 (0.2%)    | 0 (0.0%)  | 0.251  |
| Ligation of TOF                                                                                                              | 2 (0.4%)    | 2 (1.4%)    | 0 (0.0%)    | 0 (0.0%)  | 0.051  |
| Jejunal interposition                                                                                                        | 0 (0.0%)    | 0 (0.0%)    | 0 (0.0%)    | 0 (0.0%)  | -      |
| Other                                                                                                                        | 4 (0.7%)    | 1 (0.7%)    | 2 (0.5%)    | 1 (14.3%) | <0.001 |

|                                                                                                                  |             |             |             |            |        |
|------------------------------------------------------------------------------------------------------------------|-------------|-------------|-------------|------------|--------|
| Not applicable, primary anastomosis undertaken                                                                   | 253 (45.2%) | 88 (62.4%)  | 164 (39.8%) | 1 (14.3%)  | <0.001 |
| Not applicable, patient died                                                                                     | 5 (0.9%)    | 0 (0.0%)    | 5 (1.2%)    | 0 (0.0%)   | 0.404  |
| Unknown                                                                                                          | 46 (8.2%)   | 5 (3.5%)    | 40 (9.7%)   | 1 (14.3%)  | 0.060  |
| If the patient had tracheomalacia, was an intervention undertaken?                                               |             |             |             |            |        |
| Yes: aortopexy                                                                                                   | 0 (0.0%)    | 0 (0.0%)    | 0 (0.0%)    | 0 (0.0%)   | 0.614  |
| Yes: tracheostomy                                                                                                | 3 (4.2%)    | 2 (6.3%)    | 1 (2.6%)    | 0 (0.0%)   | -      |
| Yes: tracheal stent                                                                                              | 0 (0.0%)    | 0 (0.0%)    | 0 (0.0%)    | 0 (0.0%)   | -      |
| Yes: supportive management (oxygen +/- ventilation) only                                                         | 17 (23.9%)  | 7 (21.9%)   | 10 (25.6%)  | 0 (0.0%)   | -      |
| Yes: other treatment                                                                                             | 2 (2.8%)    | 1 (3.1%)    | 1 (2.6%)    | 0 (0.0%)   | -      |
| No                                                                                                               | 49 (69.0%)  | 22 (68.8%)  | 27 (69.2%)  | 0 (0.0%)   | -      |
| <b>Outcomes:</b>                                                                                                 |             |             |             |            |        |
| Did the patient survive to discharge (or 30-days if still an in-patient 30-days following primary intervention)? |             |             |             |            |        |
| Yes                                                                                                              | 423 (75.5%) | 131 (92.9%) | 291 (70.6%) | 1 (14.3%)  | <0.001 |
| No                                                                                                               | 137 (24.5%) | 10 (7.1%)   | 121 (29.4%) | 6 (85.7%)  | -      |
| If the patient was discharged prior, were they still alive at 30-days following primary intervention?            |             |             |             |            |        |
| Yes                                                                                                              | 385 (91.0%) | 125 (95.4%) | 260 (89.3%) | 0 (0.0%)   | <0.001 |
| No                                                                                                               | 2 (0.5%)    | 0 (0.0%)    | 2 (0.7%)    | 0 (0.0%)   | -      |
| Not followed-up after discharge                                                                                  | 19 (4.5%)   | 0 (0.0%)    | 19 (6.5%)   | 0 (0.0%)   | -      |
| Followed-up, but not until 30-days post primary intervention                                                     | 17 (4.0%)   | 6 (4.6%)    | 10 (3.4%)   | 1 (100.0%) | -      |
| Cause of mortality:                                                                                              |             |             |             |            |        |
| Sepsis                                                                                                           | 44 (31.7%)  | 1 (10.0%)   | 42 (34.1%)  | 1 (16.7%)  | 0.069  |
| Respiratory failure                                                                                              | 38 (27.3%)  | 3 (30.0%)   | 33 (26.8%)  | 2 (33.3%)  | -      |
| Cardiac failure                                                                                                  | 21 (15.1%)  | 3 (30.0%)   | 17 (13.8%)  | 1 (16.7%)  | -      |
| Aspiration pneumonia                                                                                             | 19 (13.7%)  | 0 (0.0%)    | 18 (14.6%)  | 1 (16.7%)  | -      |
| Haemorrhage                                                                                                      | 5 (3.6%)    | 1 (10.0%)   | 4 (3.3%)    | 0 (0.0%)   | -      |
| Syndrome incompatible with life                                                                                  | 3 (2.2%)    | 2 (20.0%)   | 1 (0.8%)    | 0 (0.0%)   | -      |
| Recurrent tracheo-oesophageal fistula                                                                            | 1 (0.7%)    | 0 (0.0%)    | 1 (0.8%)    | 0 (0.0%)   | -      |
| Anastomotic leak                                                                                                 | 1 (0.7%)    | 0 (0.0%)    | 1 (0.8%)    | 0 (0.0%)   | -      |
| Other                                                                                                            | 7 (5.0%)    | 0 (0.0%)    | 6 (4.9%)    | 1 (16.7%)  | -      |
| Median duration of hospital stays, (IQR) days                                                                    | 18 (18)     | 23 (17)     | 18 (17)     | 6 (17)     | 0.001  |
| Did the patient have a surgical site infection?                                                                  |             |             |             |            |        |
| Yes                                                                                                              | 63 (11.3%)  | 10 (7.1%)   | 53 (12.9%)  | 0 (0.0%)   | <0.001 |
| No                                                                                                               | 443 (79.1%) | 128 (90.8%) | 312 (75.7%) | 3 (42.9%)  | -      |
| Not applicable, no surgical wound                                                                                | 54 (9.6%)   | 3 (2.1%)    | 47 (11.4%)  | 4 (57.1%)  | -      |
| Did the patient have a full thickness wound dehiscence?                                                          |             |             |             |            |        |
| Yes                                                                                                              | 7 (1.3%)    | 1 (0.7%)    | 6 (1.5%)    | 0 (0.0%)   | <0.001 |
| No                                                                                                               | 497 (88.8%) | 137 (97.2%) | 357 (86.7%) | 3 (42.9%)  | -      |
| Not applicable, no surgical wound                                                                                | 56 (10.0%)  | 3 (2.1%)    | 49 (11.9%)  | 4 (57.1%)  | -      |
| Did the patient require a further unplanned intervention?                                                        |             |             |             |            |        |
| Yes – percutaneous                                                                                               | 19 (3.4%)   | 9 (6.4%)    | 10 (2.4%)   | 0 (0.0%)   | <0.001 |
| Yes – surgical intervention                                                                                      | 52 (9.3%)   | 14 (9.9%)   | 38 (9.2%)   | 0 (0.0%)   | -      |
| No                                                                                                               | 443 (79.1%) | 115 (81.6%) | 325 (78.9%) | 3 (42.9%)  | -      |
| Not applicable – no primary intervention undertaken                                                              | 46 (8.2%)   | 3 (2.1%)    | 39 (9.5%)   | 4 (57.1%)  | -      |
| If a central line was inserted, did the patient acquire central line sepsis?                                     |             |             |             |            |        |
| Yes, diagnosed clinically                                                                                        | 12 (3.3%)   | 1 (0.8%)    | 11 (4.4%)   | 0 (0.0%)   | 0.170  |
| Yes, confirmed on microbiology                                                                                   | 24 (6.5%)   | 9 (7.6%)    | 15 (6.0%)   | 0 (0.0%)   | -      |
| No                                                                                                               | 332 (90.2%) | 109 (91.6%) | 223 (89.6%) | 0 (0.0%)   | -      |
| Did the patient have a condition specific complication within 30-days of primary intervention?                   |             |             |             |            |        |
| Pneumonia                                                                                                        | 117 (20.9%) | 12 (8.5%)   | 104 (25.2%) | 1 (14.3%)  | <0.001 |
| Anastomotic leak                                                                                                 | 63 (11.3%)  | 13 (9.2%)   | 49 (11.9%)  | 1 (14.3%)  | 0.665  |
| Pneumothorax                                                                                                     | 57 (10.2%)  | 20 (14.2%)  | 37 (9.0%)   | 0 (0.0%)   | 0.141  |
| Mediastinitis                                                                                                    | 37 (6.6%)   | 8 (5.7%)    | 29 (7.04%)  | 0 (0.0%)   | 0.664  |
| Anastomotic stricture                                                                                            | 27 (4.8%)   | 13 (9.2%)   | 14 (3.4%)   | 0 (0.0%)   | 0.017  |
| Recurrent TOF                                                                                                    | 10 (1.8%)   | 3 (2.1%)    | 7 (1.7%)    | 0 (0.0%)   | 0.887  |
| Chylothorax                                                                                                      | 6 (1.1%)    | 2 (1.4%)    | 4 (1.0%)    | 0 (0.0%)   | 0.871  |
| Haemothorax                                                                                                      | 3 (0.5%)    | 1 (1.0%)    | 2 (0.5%)    | 0 (0.0%)   | 0.934  |
| NEC                                                                                                              | 3 (0.5%)    | 0 (0.0%)    | 3 (0.7%)    | 0 (0.0%)   | 0.582  |
| Left vocal cord paralysis/recurrent laryngeal nerve palsy                                                        | 2 (0.4%)    | 2 (1.4%)    | 0 (0.0%)    | 0 (0.0%)   | 0.051  |
| Ligation of a bronchus                                                                                           | 1 (0.2%)    | 0 (0.0%)    | 1 (0.2%)    | 0 (0.0%)   | 0.835  |
| Paralysis of the diaphragm                                                                                       | 1 (0.2%)    | 0 (0.0%)    | 1 (0.2%)    | 0 (0.0%)   | 0.835  |
| Other                                                                                                            | 18 (3.2%)   | 5 (3.6%)    | 13 (3.2%)   | 0 (0.0%)   | 0.866  |
| N/A, no intervention                                                                                             | 4 (0.7%)    | 1 (0.7%)    | 2 (0.5%)    | 1 (14.3%)  | <0.001 |
| None                                                                                                             | 285 (50.9%) | 83 (58.9%)  | 200 (48.5%) | 2 (28.6%)  | 0.053  |
| Was the patient followed up at 30-days post primary surgery or intervention to assess for complications?         |             |             |             |            |        |
| Yes: reviewed in person                                                                                          | 231 (54.7%) | 65 (50.0%)  | 166 (57.0%) | 0 (0.0%)   | 0.012  |
| Yes: via telephone consultation                                                                                  | 31 (7.3%)   | 5 (3.8%)    | 26 (8.9%)   | 0 (0.0%)   | -      |
| Yes: via other means                                                                                             | 15 (3.6%)   | 2 (1.5%)    | 13 (4.5%)   | 0 (0.0%)   | -      |
| Yes: still an in-patient at 30-days                                                                              | 90 (21.3%)  | 39 (30.0%)  | 51 (17.5%)  | 0 (0.0%)   | -      |
| No: data is based on in-patient observations only                                                                | 27 (6.4%)   | 13 (10.0%)  | 13 (4.5%)   | 1 (100.0%) | -      |
| No: follow-up was done, but prior to 30-days                                                                     | 28 (6.7%)   | 6 (4.6%)    | 22 (7.6%)   | 0 (0.0%)   | -      |
| If the patient had a complication, when was it diagnosed?                                                        |             |             |             |            |        |
| During the primary admission                                                                                     | 186 (33.4%) | 45 (31.9%)  | 141 (34.4%) | 0 (0.0%)   | <0.001 |
| As an emergency re-attender                                                                                      | 18 (3.2%)   | 8 (5.7%)    | 10 (2.4%)   | 0 (0.0%)   | -      |
| At routine follow-up as an out-patient                                                                           | 15 (2.7%)   | 2 (1.4%)    | 13 (3.2%)   | 0 (0.0%)   | -      |
| Not applicable, no complications                                                                                 | 338 (60.7%) | 86 (61.0%)  | 246 (60.0%) | 6 (100.0%) | -      |

\*Patients born in hospital = 0. HIC: High-income countries. IQR: Interquartile range. LIC: Low-income countries. MIC: Middle-income countries. NEC: Necrotising enterocolitis. OA: Oesophageal atresia. TOF: Trachea-oesophageal fistula.

**Supplementary Table 2: Characteristics, perioperative care, surgical interventions, and outcomes for patients with congenital diaphragmatic hernia (CDH)**

| Variable                                                                                | Total<br>(n=448) | HIC<br>(n=148) | LMIC*<br>(n=300) | P value          |
|-----------------------------------------------------------------------------------------|------------------|----------------|------------------|------------------|
| <b>Patient Characteristics:</b>                                                         |                  |                |                  |                  |
| Median gestational age at birth (IQR), weeks                                            | 38 (2)           | 38 (2)         | 38 (2)           | 0.534            |
| Median age at presentation (IQR), hours                                                 | 7 (96)           | 0 (24)         | 20 (168)         | <b>&lt;0.001</b> |
| Sex:                                                                                    |                  |                |                  |                  |
| Male                                                                                    | 262 (58.5%)      | 83 (56.1%)     | 179 (59.7%)      | 0.470            |
| Female                                                                                  | 186 (41.5%)      | 65 (43.9%)     | 121 (40.3%)      |                  |
| Median weight at presentation (IQR), kg                                                 | 3.1 (1.0)        | 3.2 (1.0)      | 3.0 (0.9)        | 0.493            |
| Does the patient have another anomaly in addition to the study condition?               |                  |                |                  |                  |
| Yes: Cardiovascular                                                                     | 179 (40.0%)      | 55 (37.2%)     | 124 (41.3%)      | 0.397            |
| Yes: Respiratory                                                                        | 70 (15.6%)       | 23 (15.5%)     | 47 (15.7%)       | 0.972            |
| Yes: Gastrointestinal                                                                   | 24 (5.4%)        | 12 (8.1%)      | 12 (4.0%)        | 0.069            |
| Yes: Neurological                                                                       | 17 (3.8%)        | 12 (8.1%)      | 5 (1.7%)         | <b>0.001</b>     |
| Yes: Genito-urinary                                                                     | 16 (3.6%)        | 10 (6.8%)      | 6 (2.0%)         | <b>0.011</b>     |
| Yes: Musculoskeletal                                                                    | 16 (3.6%)        | 9 (6.1%)       | 7 (2.3%)         | <b>0.044</b>     |
| Yes: Down syndrome                                                                      | 3 (0.7%)         | 0 (0.0%)       | 3 (1.0%)         | 0.222            |
| Yes: Beckwith Wiedemann syndrome                                                        | 0 (0.0%)         | 0 (0.0%)       | 0 (0.0%)         | -                |
| Yes: Cystic fibrosis                                                                    | 0 (0.0%)         | 0 (0.0%)       | 0 (0.0%)         | -                |
| Yes: Chromosomal                                                                        | 9 (2.0%)         | 4 (2.7%)       | 5 (1.7%)         | 0.462            |
| Yes: Other                                                                              | 22 (4.9%)        | 9 (6.1%)       | 13 (4.3%)        | 0.421            |
| No                                                                                      | 209 (46.7%)      | 69 (46.6%)     | 140 (46.7%)      | 0.993            |
| Median distance from patient's home to hospital (IQR), km†                              | 13 (89)          | 6 (56)         | 15 (108)         | <b>0.003</b>     |
| Type of delivery:                                                                       |                  |                |                  |                  |
| Vaginal (spontaneous)                                                                   | 190 (42.4%)      | 59 (39.9%)     | 131 (43.7%)      | <b>&lt;0.001</b> |
| Vaginal (induced)                                                                       | 33 (7.4%)        | 21 (14.2%)     | 12 (4.0%)        | -                |
| Caesarean section (elective)                                                            | 123 (27.5%)      | 30 (20.3%)     | 93 (31.0%)       | -                |
| Caesarean section (urgent/non-elective)                                                 | 92 (20.5%)       | 29 (19.6%)     | 63 (21.0%)       | -                |
| Unknown                                                                                 | 9 (2.0%)         | 8 (5.4%)       | 1 (0.3%)         | -                |
| Missing                                                                                 | 1 (0.2%)         | 1 (0.7%)       | 0 (0.0%)         | -                |
| Was the patient septic on arrival to your hospital?                                     |                  |                |                  |                  |
| Yes                                                                                     | 74 (16.5%)       | 5 (3.4%)       | 69 (23.0%)       | <b>&lt;0.001</b> |
| No                                                                                      | 372 (83.0%)      | 142 (95.9%)    | 230 (76.7%)      | -                |
| Missing                                                                                 | 2 (0.4%)         | 1 (0.7%)       | 1 (0.3%)         | -                |
| Was the patient hypovolaemic on arrival to your hospital?                               |                  |                |                  |                  |
| Yes                                                                                     | 63 (14.1%)       | 15 (10.1%)     | 48 (16.0%)       | 0.092            |
| No                                                                                      | 384 (85.7%)      | 132 (89.2%)    | 252 (84.0%)      | -                |
| Missing                                                                                 | 1 (0.2%)         | 1 (0.7%)       | 0 (0.0%)         | -                |
| Was the patient hypothermic on arrival to your hospital?                                |                  |                |                  |                  |
| Yes                                                                                     | 49 (10.9%)       | 3 (2.0%)       | 46 (15.3%)       | <b>&lt;0.001</b> |
| No                                                                                      | 398 (88.8%)      | 144 (97.3%)    | 254 (84.7%)      | -                |
| Missing                                                                                 | 1 (0.2%)         | 1 (0.7%)       | 0 (0.0%)         | -                |
| American Society of Anaesthesiologists (ASA) Score at the time of primary intervention: |                  |                |                  |                  |
| 1. Healthy person                                                                       | 38 (8.5%)        | 2 (1.4%)       | 36 (12.0%)       | <b>&lt;0.001</b> |
| 2. Mild systemic disease                                                                | 76 (17.0%)       | 17 (11.5%)     | 59 (19.7%)       | -                |
| 3. Severe systemic disease                                                              | 148 (33.0%)      | 63 (42.6%)     | 85 (28.3%)       | -                |
| 4. Severe systemic disease that is a constant threat to life                            | 96 (21.4%)       | 47 (31.8%)     | 49 (16.3%)       | -                |
| 5. A moribund patient who is not expected to survive without the operation              | 23 (5.1%)        | 7 (4.7%)       | 16 (5.3%)        | -                |
| Not applicable - no intervention                                                        | 66 (14.7%)       | 11 (7.4%)      | 55 (18.3%)       | -                |
| Missing                                                                                 | 1 (0.2%)         | 1 (0.7%)       | 0 (0.0%)         | -                |
| What study condition does the patient have?                                             |                  |                |                  |                  |
| Oesophageal atresia                                                                     | 1(0.2%)          | 1(0.7%)        | 0(0.0%)          | 0.154            |
| Congenital diaphragmatic hernia                                                         | 448 (100%)       | 148 (100%)     | 300 (100%)       | -                |
| Intestinal atresia                                                                      | 0 (0.0%)         | 0(0.0%)        | 0(0.0%)          | -                |
| Gastroschisis                                                                           | 0 (0.0%)         | 0(0.0%)        | 0(0.0%)          | -                |
| Exomphalos/Omphalocele                                                                  | 1(0.2%)          | 1(0.7%)        | 0(0.0%)          | 0.154            |
| Anorectal malformation                                                                  | 1(0.2%)          | 1(0.7%)        | 0(0.0%)          | 0.154            |
| Hirschsprung's Disease                                                                  | 1(0.2%)          | 0(0.0%)        | 1(0.3%)          | 0.482            |
| Type of CDH                                                                             |                  |                |                  |                  |
| Left posteriolateral (Bochdalek)                                                        | 316 (70.5%)      | 100 (67.6%)    | 216 (72.0%)      | 0.190            |
| Right posteriolateral (Bochdalek)                                                       | 69 (15.4%)       | 30 (20.3%)     | 39 (13.0%)       | -                |
| Bilateral posteriolateral (Bochdalek)                                                   | 7 (1.6%)         | 1 (0.7%)       | 6 (2.0%)         | -                |
| Central                                                                                 | 21 (4.7%)        | 5 (3.4%)       | 16 (5.3%)        | -                |
| Anterior (Morgagni)                                                                     | 21 (4.7%)        | 9 (6.1%)       | 12 (4.0%)        | -                |
| Other                                                                                   | 2 (0.4%)         | 0 (0.0%)       | 2 (0.7%)         | -                |
| Hiatal hernia                                                                           | 4 (0.9%)         | 2 (1.4%)       | 2 (0.7%)         | -                |
| Eventration                                                                             | 2 (0.4%)         | 1 (0.7%)       | 1 (0.3%)         | -                |

|                                                                                                                 |             |            |             |                  |
|-----------------------------------------------------------------------------------------------------------------|-------------|------------|-------------|------------------|
| Unknown                                                                                                         | 6 (1.3%)    | 0 (0.0%)   | 6 (2.0%)    | -                |
| <b>Type of Bochdalek CDH (CDH Study Group Classification)</b>                                                   |             |            |             |                  |
| A                                                                                                               | 41 (10.7%)  | 15 (11.6%) | 26 (10.3%)  | <b>0.012</b>     |
| B                                                                                                               | 168 (44.0%) | 57 (44.2%) | 111 (43.9%) | -                |
| C                                                                                                               | 87 (22.8%)  | 36 (27.9%) | 51 (20.2%)  | -                |
| D                                                                                                               | 29 (7.6%)   | 12 (9.3%)  | 17 (6.7%)   | -                |
| Other (specify)                                                                                                 | 1 (0.3%)    | 1 (0.8%)   | 0 (0.0%)    | -                |
| Unknown                                                                                                         | 56 (14.7%)  | 8 (6.2%)   | 48 (19.0%)  | -                |
| <b>If bilateral, what was the type of Bochdalek hernia on the left (CDH Study Group)</b>                        |             |            |             |                  |
| A                                                                                                               | 0 (0.0%)    | 0 (0.0%)   | 0 (0.0%)    | 0.230            |
| B                                                                                                               | 0 (0.0%)    | 0 (0.0%)   | 0 (0.0%)    | -                |
| C                                                                                                               | 2 (28.6%)   | 1 (100.0%) | 1 (16.7%)   | -                |
| D                                                                                                               | 1 (14.3%)   | 0 (0.0%)   | 1 (16.7%)   | -                |
| Unknown                                                                                                         | 4 (57.1%)   | 0 (0.0%)   | 4 (66.7%)   | -                |
| <b>If bilateral, what was the type of Bochdalek hernia on the right (CDH Study Group)</b>                       |             |            |             |                  |
| A                                                                                                               | 1 (14.3%)   | 0 (0.0%)   | 1 (16.7%)   | 0.072            |
| B                                                                                                               | 1 (14.3%)   | 0 (0.0%)   | 1 (16.7%)   | -                |
| C                                                                                                               | 1 (14.3%)   | 1 (100.0%) | 0 (0.0%)    | -                |
| D                                                                                                               | 0 (0.0%)    | 0 (0.0%)   | 0 (0.0%)    | -                |
| Unknown                                                                                                         | 4 (57.1%)   | 0 (0.0%)   | 4 (66.7%)   | -                |
| <b>Liver position?</b>                                                                                          |             |            |             |                  |
| Chest                                                                                                           | 124 (27.7%) | 57 (38.5%) | 67 (22.3%)  | <b>&lt;0.001</b> |
| Abdomen                                                                                                         | 284 (63.4%) | 83 (56.1%) | 201 (67.0%) | -                |
| Unknown                                                                                                         | 40 (8.9%)   | 8 (5.4%)   | 32 (10.7%)  | -                |
| <b>Did the patient have pulmonary hypertension (at any stage)?</b>                                              |             |            |             |                  |
| Yes: diagnosed clinically                                                                                       | 57 (12.7%)  | 13 (8.8%)  | 44 (14.7%)  | <b>&lt;0.001</b> |
| Yes: diagnosis confirmed on echocardiography                                                                    | 202 (45.1%) | 70 (47.3%) | 132 (44.0%) | -                |
| No                                                                                                              | 152 (33.9%) | 61 (41.2%) | 91 (30.3%)  | -                |
| Unknown                                                                                                         | 36 (8.0%)   | 3 (2.0%)   | 33 (11.0%)  | -                |
| Missing                                                                                                         | 1 (0.2%)    | 1 (0.7%)   | 0 (0.0%)    | -                |
| <b>Care prior to presentation at the paediatric surgery centre:</b>                                             |             |            |             |                  |
| <b>Antenatal ultrasound undertaken?</b>                                                                         |             |            |             |                  |
| Yes: study condition diagnosed                                                                                  | 183 (40.8%) | 88 (59.5%) | 95 (31.7%)  | <b>&lt;0.001</b> |
| Yes: problem identified but study condition not diagnosed                                                       | 28 (6.3%)   | 8 (5.4%)   | 20 (6.7%)   | -                |
| Yes: no problem identified                                                                                      | 191 (42.6%) | 42 (28.4%) | 149 (49.7%) | -                |
| No                                                                                                              | 44 (9.8%)   | 8 (5.4%)   | 36 (12.0%)  | -                |
| Missing                                                                                                         | 2 (0.4%)    | 2 (1.4%)   | 0 (0.0%)    | -                |
| Median gestational age of study condition diagnosis if diagnosis was antenatal (IQR), weeks                     | 26 (13)     | 24 (12)    | 27 (11)     | 0.129            |
| <b>Mode of transport to hospital:</b>                                                                           |             |            |             |                  |
| Ambulance                                                                                                       | 169 (37.7%) | 43 (29.1%) | 126 (42.0%) | <b>&lt;0.001</b> |
| Other transport provided by the health service                                                                  | 17 (3.8%)   | 8 (5.4%)   | 9 (3.0%)    | -                |
| Patient's own transport                                                                                         | 96 (21.4%)  | 14 (9.5%)  | 82 (27.3%)  | -                |
| Born within the hospital                                                                                        | 165 (36.8%) | 82 (55.4%) | 83 (27.7%)  | -                |
| Missing                                                                                                         | 1 (0.2%)    | 1 (0.7%)   | 0 (0.0%)    | -                |
| <b>If outborn, where did the patient present from?</b>                                                          |             |            |             |                  |
| Home                                                                                                            | 58 (20.7%)  | 12 (18.8%) | 46 (21.3%)  | 0.580            |
| Community Clinic/General Practice                                                                               | 39 (13.9%)  | 7 (10.9%)  | 32 (14.8%)  | -                |
| District Hospital                                                                                               | 180 (64.3%) | 45 (70.3%) | 135 (62.5%) | -                |
| Unknown                                                                                                         | 3 (1.1%)    | 0 (0.0%)   | 3 (1.4%)    | -                |
| <b>Perioperative care at the paediatric surgery centre:</b>                                                     |             |            |             |                  |
| <b>If septic, were appropriate antibiotics administered?</b>                                                    |             |            |             |                  |
| Yes within 1 hour of arrival                                                                                    | 63 (85.1%)  | 5 (100.0%) | 58 (84.1%)  | 0.330            |
| Yes within the first day of arrival                                                                             | 11 (14.9%)  | 0 (0.0%)   | 11 (15.9%)  | -                |
| No                                                                                                              | 0 (0.0%)    | 0 (0.0%)   | 0 (0.0%)    | -                |
| <b>If hypovolaemic, was an intravenous fluid bolus given?</b>                                                   |             |            |             |                  |
| Yes within 1 hour of arrival                                                                                    | 48 (76.2%)  | 7 (50.0%)  | 41 (85.4%)  | <b>0.009</b>     |
| Yes within the first day of arrival                                                                             | 13 (20.6%)  | 6 (42.9%)  | 7 (14.6%)   | -                |
| No                                                                                                              | 1 (1.6%)    | 1 (7.1%)   | 0 (0.0%)    | -                |
| Missing                                                                                                         | 1 (1.6%)    | 1          | 0 (0.0%)    | -                |
| <b>If hypovolaemic, how much intravenous fluid was given?</b>                                                   |             |            |             |                  |
| 10 - 20mls/kg                                                                                                   | 43 (70.5%)  | 7 (53.8%)  | 36 (75.0%)  | 0.110            |
| Above 20mls/kg                                                                                                  | 17 (27.9%)  | 6 (46.2%)  | 11 (22.9%)  | -                |
| Missing                                                                                                         | 1 (1.6%)    | 0 (0.0%)   | 1 (2.1%)    | -                |
| <b>If hypothermic, was the patient warmed on arrival to your hospital to within a normal temperature range?</b> |             |            |             |                  |
| Yes                                                                                                             | 45 (91.8%)  | 2 (66.7%)  | 43 (93.5%)  | 0.100            |
| No                                                                                                              | 4 (8.2%)    | 1 (33.3%)  | 3 (6.5%)    | -                |
| <b>Did the patient receive central venous access?</b>                                                           |             |            |             |                  |
| Yes: umbilical catheter                                                                                         | 155 (34.6%) | 74 (50.0%) | 81 (27.0%)  | <b>&lt;0.001</b> |
| Yes: peripherally inserted central catheter (PICC)                                                              | 139 (31.0%) | 81 (54.7%) | 58 (19.3%)  | <b>&lt;0.001</b> |
| Yes: percutaneously inserted central line with ultrasound guidance                                              | 77 (17.2%)  | 42 (28.4%) | 35 (11.7%)  | <b>&lt;0.001</b> |
| Yes: surgically placed central line (open insertion)                                                            | 29 (6.5%)   | 4 (2.7%)   | 25 (8.3%)   | <b>0.023</b>     |

|                                                                                 |             |             |             |                  |
|---------------------------------------------------------------------------------|-------------|-------------|-------------|------------------|
| No                                                                              | 136 (30.4%) | 12 (8.1%)   | 124 (41.3%) | <b>&lt;0.001</b> |
| Median total duration of antibiotics following primary intervention (IQR), days | 5 (9)       | 3 (5)       | 6 (10)      | <b>&lt;0.001</b> |
| Did the patient receive a blood transfusion?                                    |             |             |             |                  |
| Yes: not cross-matched                                                          | 10 (2.2%)   | 2 (1.4%)    | 8 (2.7%)    | 0.600            |
| Yes: cross-matched.                                                             | 175 (39.1%) | 54 (36.5%)  | 121 (40.3%) | -                |
| No: not required.                                                               | 253 (56.5%) | 87 (58.8%)  | 166 (55.3%) | -                |
| No: it was required but not available.                                          | 9 (2.0%)    | 4 (2.7%)    | 5 (1.7%)    | -                |
| Missing                                                                         | 1 (0.2%)    | 1 (0.7%)    | 0 (0.0%)    | -                |
| Did the patient require ventilation?                                            |             |             |             |                  |
| Yes and it was given                                                            | 387 (86.4%) | 138 (93.2%) | 249 (83.0%) | <b>0.010</b>     |
| Yes, but it was not available                                                   | 3 (0.7%)    | 0 (0.0%)    | 3 (1.0%)    | -                |
| No                                                                              | 58 (12.9%)  | 10 (6.8%)   | 48 (16.0%)  | -                |
| Median time patient remained on ventilation if given (IQR), days                | 6 (11)      | 8 (11)      | 4 (8)       | <b>&lt;0.001</b> |
| Median time to first enteral feed (post-primary intervention) (IQR), days       | 4 (4)       | 4 (4)       | 4 (4)       | 0.923            |
| Median time to full enteral feeds (post-primary intervention) (IQR), days       | 9 (11)      | 11 (14)     | 8 (10)      | <b>&lt;0.001</b> |
| Did the patient require parenteral nutrition?                                   |             |             |             |                  |
| Yes and it was given                                                            | 286 (63.8%) | 127 (85.8%) | 159 (53.0%) | <b>&lt;0.001</b> |
| Yes and it was sometimes available, but less than required                      | 13 (2.9%)   | 0 (0.0%)    | 13 (4.3%)   | -                |
| Yes, but it was not available                                                   | 3 (0.7%)    | 0 (0.0%)    | 3 (1.0%)    | -                |
| No                                                                              | 146 (32.6%) | 21 (14.2%)  | 125 (41.7%) | -                |
| Median time patient received parenteral nutrition if received (IQR), days       | 10 (11)     | 13 (13)     | 8 (8)       | <b>&lt;0.001</b> |
| <b>Surgical intervention:</b>                                                   |             |             |             |                  |
| Primary intervention:                                                           |             |             |             |                  |
| Primary repair (non-absorbable sutures)                                         | 254 (56.7%) | 73 (49.3%)  | 181 (60.3%) | <b>&lt;0.001</b> |
| Palliation                                                                      | 68 (15.2%)  | 12 (8.1%)   | 56 (18.7%)  | -                |
| Patch repair                                                                    | 66 (14.7%)  | 43 (29.1%)  | 23 (7.7%)   | -                |
| Primary repair (absorbable sutures)                                             | 43 (9.6%)   | 15 (10.1%)  | 28 (9.3%)   | -                |
| Discharged with planned elective repair                                         | 8 (1.8%)    | 4 (2.7%)    | 4 (1.3%)    | -                |
| Other                                                                           | 3 (0.7%)    | 0 (0.0%)    | 3 (1.0%)    | -                |
| Missing                                                                         | 6 (1.3%)    | 1 (0.7%)    | 5 (1.7%)    | -                |
| If patch repair, material used:                                                 |             |             |             |                  |
| Permacol                                                                        | 2 (3.0%)    | 0 (0.0%)    | 2 (8.7%)    | <b>&lt;0.001</b> |
| PTFE                                                                            | 29 (43.9%)  | 23 (53.5%)  | 6 (26.1%)   | -                |
| Mesh plug                                                                       | 10 (15.2%)  | 3 (7.0%)    | 7 (30.4%)   | -                |
| Muscle flap                                                                     | 1 (1.5%)    | 1 (2.3%)    | 0 (0.0%)    | -                |
| Gortex                                                                          | 14 (21.2%)  | 14 (32.6%)  | 0 (0.0%)    | -                |
| Prolene                                                                         | 4 (6.1%)    | 0 (0.0%)    | 4 (17.4%)   | -                |
| Other                                                                           | 5 (7.6%)    | 1 (2.3%)    | 4 (17.4%)   | -                |
| Unknown                                                                         | 1 (1.5%)    | 1 (2.3%)    | 0 (0.0%)    | -                |
| Other procedures undertaken at the same time:                                   |             |             |             |                  |
| Chest drain insertion                                                           | 104 (23.2%) | 24 (16.2%)  | 80 (26.7%)  | <b>0.014</b>     |
| Abdominal wall patch                                                            | 16 (3.6%)   | 9 (6.1%)    | 7 (2.3%)    | <b>0.044</b>     |
| Fundoplication                                                                  | 14 (3.1%)   | 1 (0.7%)    | 13 (4.3%)   | <b>0.036</b>     |
| Correction of malrotation                                                       | 26 (5.8%)   | 13 (8.8%)   | 13 (4.3%)   | 0.058            |
| Appendectomy                                                                    | 29 (6.5%)   | 13 (8.8%)   | 16 (5.3%)   | 0.163            |
| Abdominal silo application (difficult closure)                                  | 6 (1.3%)    | 6 (4.1%)    | 0 (0.0%)    | <b>0.000</b>     |
| Gastrostomy insertion                                                           | 1 (0.2%)    | 1 (0.7%)    | 0 (0.0%)    | 0.154            |
| Central line insertion                                                          | 2 (0.4%)    | 0 (0.0%)    | 2 (0.7%)    | 0.319            |
| Resection of Meckle's Diverticulum                                              | 2 (0.4%)    | 2 (1.4%)    | 0 (0.0%)    | <b>0.044</b>     |
| Other (specify)                                                                 | 11 (2.5%)   | 3 (2.0%)    | 8 (2.7%)    | 0.681            |
| None                                                                            | 178 (39.7%) | 66 (44.6%)  | 112 (37.3%) | 0.140            |
| Surgical approach                                                               |             |             |             |                  |
| Laparotomy                                                                      | 266 (73.3%) | 92 (70.2%)  | 174 (75.0%) | 0.230            |
| Laparoscopy                                                                     | 18 (5.0%)   | 4 (3.1%)    | 14 (6.0%)   | -                |
| Thoracotomy                                                                     | 23 (6.3%)   | 10 (7.6%)   | 13 (5.6%)   | -                |
| Thoracoscopy                                                                    | 52 (14.3%)  | 23 (17.6%)  | 29 (12.5%)  | -                |
| Other (please specify)                                                          | 1 (0.3%)    | 1 (0.8%)    | 0 (0.0%)    | -                |
| Missing                                                                         | 3 (0.8%)    | 1 (0.8%)    | 2 (0.9%)    | -                |
| Conversion to open                                                              |             |             |             |                  |
| Yes                                                                             | 9 (12.9%)   | 3 (11.1%)   | 6 (14.0%)   | 0.730            |
| No                                                                              | 61 (87.1%)  | 24 (88.9%)  | 37 (86.0%)  | -                |
| Median time from arrival at your hospital to primary intervention (IQR), hours  | 54 (96)     | 65 (72)     | 48 (96)     | 0.912            |
| What type of anaesthesia was used for the primary intervention?                 |             |             |             |                  |
| General anaesthesia with endotracheal tube                                      | 364 (81.3%) | 131 (88.5%) | 233 (77.7%) | <b>0.005</b>     |
| General anaesthesia with laryngeal airway                                       | 2 (0.4%)    | 0 (0.0%)    | 2 (0.7%)    | -                |
| Ketamine anaesthesia                                                            | 1 (0.2%)    | 1 (0.7%)    | 0 (0.0%)    | -                |
| Spinal/caudal anaesthesia                                                       | 0 (0.0%)    | 0 (0.0%)    | 0 (0.0%)    | -                |
| Local anaesthesia only                                                          | 1 (0.2%)    | 1 (0.7%)    | 0 (0.0%)    | -                |
| No anaesthesia, just analgesia                                                  | 1 (0.2%)    | 1 (0.7%)    | 0 (0.0%)    | -                |
| No anaesthesia, no analgesia                                                    | 0 (0.0%)    | 0 (0.0%)    | 0 (0.0%)    | -                |

|                                                                                                                  |             |             |             |                  |
|------------------------------------------------------------------------------------------------------------------|-------------|-------------|-------------|------------------|
| Not applicable: no surgery or primary intervention undertaken.                                                   | 79 (17.6%)  | 14 (9.5%)   | 65 (21.7%)  | -                |
| Who undertook the anaesthetic for the primary intervention?                                                      |             |             |             |                  |
| Anaesthetic doctor                                                                                               | 367 (81.9%) | 132 (89.2%) | 235 (78.3%) | <b>0.004</b>     |
| Anaesthetic nurse                                                                                                | 0 (0.0%)    | 0 (0.0%)    | 0 (0.0%)    | -                |
| Medical officer                                                                                                  | 0 (0.0%)    | 0 (0.0%)    | 0 (0.0%)    | -                |
| Surgeon                                                                                                          | 0 (0.0%)    | 0 (0.0%)    | 0 (0.0%)    | -                |
| Other healthcare professional                                                                                    | 1 (0.2%)    | 1 (0.7%)    | 0 (0.0%)    | -                |
| No anaesthetic undertaken                                                                                        | 80 (17.9%)  | 15 (10.1%)  | 65 (21.7%)  | -                |
| Who undertook the primary intervention?                                                                          |             |             |             |                  |
| Paediatric surgeon (or junior with paediatric surgeon assisting/in the room)                                     | 368 (82.1%) | 133 (89.9%) | 235 (78.3%) | <b>0.002</b>     |
| General surgeon (or junior with general surgeon assisting/in the room)                                           | 1 (0.2%)    | 1 (0.7%)    | 0 (0.0%)    | -                |
| Junior doctor, medical officer or other (without a paediatric or general surgeon assisting/in the room)          | 0 (0.0%)    | 0 (0.0%)    | 0 (0.0%)    | -                |
| Trainee surgeon (without a paediatric or general surgeon assisting or in the room)                               | 0 (0.0%)    | 0 (0.0%)    | 0 (0.0%)    | -                |
| Not applicable - no surgery or primary intervention undertaken.                                                  | 79 (17.6%)  | 14 (9.5%)   | 65 (21.7%)  | -                |
| Was a Surgical Safety Checklist used at the time of primary intervention?                                        |             |             |             |                  |
| Yes                                                                                                              | 304 (67.9%) | 124 (83.8%) | 180 (60.0%) | <b>&lt;0.001</b> |
| No: but it was available                                                                                         | 33 (7.4%)   | 6 (4.1%)    | 27 (9.0%)   | -                |
| No: it was not available                                                                                         | 30 (6.7%)   | 1 (0.7%)    | 29 (9.7%)   | -                |
| Not applicable: a conservative primary intervention was undertaken                                               | 3 (0.7%)    | 1 (0.7%)    | 2 (0.7%)    | -                |
| Not applicable: no surgery or primary intervention undertaken                                                    | 77 (17.2%)  | 15 (10.1%)  | 62 (20.7%)  | -                |
| Missing                                                                                                          | 1 (0.2%)    | 1 (0.7%)    | 0 (0.0%)    | -                |
| Was foetal tracheal occlusion (FETO) undertaken?                                                                 |             |             |             |                  |
| Yes                                                                                                              | 6 (1.3%)    | 5 (3.4%)    | 1 (0.3%)    | <b>0.008</b>     |
| No                                                                                                               | 442 (98.7%) | 143 (96.6%) | 299 (99.7%) | -                |
| If yes, at what gestational age was it inserted?                                                                 | 29 (2)      | 29 (2)      | -           | -                |
| If yes, at what gestational age was it removed?                                                                  | 34 (2)      | 34 (2)      | -           | -                |
| If the patient had pulmonary hypertension, what treatment was given?                                             |             |             |             |                  |
| Nitric oxide                                                                                                     | 97 (37.5%)  | 64 (77.1%)  | 33 (18.8%)  | <b>&lt;0.001</b> |
| Prostacyclin                                                                                                     | 28 (10.8%)  | 18 (21.7%)  | 10 (5.7%)   | <b>&lt;0.001</b> |
| Alprostadil                                                                                                      | 13 (5.0%)   | 6 (7.2%)    | 7 (4.0%)    | 0.260            |
| Milrinone                                                                                                        | 66 (25.5%)  | 23 (27.7%)  | 43 (24.4%)  | 0.570            |
| Sildenafil                                                                                                       | 64 (24.7%)  | 17 (20.5%)  | 47 (26.7%)  | 0.280            |
| Furosemide                                                                                                       | 2 (0.8%)    | 1 (1.2%)    | 1 (0.6%)    | 0.580            |
| Other inotropes (dopamine, dobutamine, adrenaline, noradrenaline and others)                                     | 16 (6.2%)   | 5 (6.0%)    | 11 (6.3%)   | 0.940            |
| None: not required                                                                                               | 57 (22.0%)  | 12 (14.5%)  | 45 (25.6%)  | <b>0.044</b>     |
| None: required but not available                                                                                 | 16 (6.2%)   | 0 (0.0%)    | 16 (9.1%)   | <b>0.005</b>     |
| Did the patient receive extracorporeal membrane oxygenation (ECMO)?                                              |             |             |             |                  |
| Yes                                                                                                              | 28 (6.3%)   | 22 (14.9%)  | 6 (2.0%)    | <b>&lt;0.001</b> |
| No                                                                                                               | 420 (93.8%) | 126 (85.1%) | 294 (98.0%) | -                |
| If yes, for how long (IQR), days                                                                                 | 7 (7)       | 8 (7)       | 6 (2)       | 0.879            |
| <b>Outcomes:</b>                                                                                                 |             |             |             |                  |
| Did the patient survive to discharge (or 30-days if still an in-patient 30-days following primary intervention)? |             |             |             |                  |
| Yes                                                                                                              | 312 (69.6%) | 127 (85.8%) | 185 (61.7%) | <b>&lt;0.001</b> |
| No                                                                                                               | 136 (30.4%) | 21 (14.2%)  | 115 (38.3%) | -                |
| If the patient was discharged prior, were they still alive at 30-days following primary intervention?            |             |             |             |                  |
| Yes                                                                                                              | 280 (90.6%) | 111 (89.5%) | 169 (91.4%) | 0.270            |
| No                                                                                                               | 1 (0.3%)    | 0 (0.0%)    | 1 (0.5%)    | -                |
| Not followed-up after discharge                                                                                  | 11 (3.6%)   | 3 (2.4%)    | 8 (4.3%)    | -                |
| Followed-up, but not until 30-days post primary intervention                                                     | 17 (5.5%)   | 10 (8.1%)   | 7 (3.8%)    | -                |
| Cause of mortality:                                                                                              |             |             |             |                  |
| Respiratory failure                                                                                              | 83 (60.6%)  | 10 (47.6%)  | 73 (62.9%)  | <b>&lt;0.001</b> |
| Cardiac failure                                                                                                  | 27 (19.7%)  | 4 (19.0%)   | 23 (19.8%)  | -                |
| Sepsis                                                                                                           | 16 (11.7%)  | 0 (0.0%)    | 16 (13.8%)  | -                |
| Haemorrhage                                                                                                      | 6 (4.4%)    | 3 (14.3%)   | 3 (2.6%)    | -                |
| Other                                                                                                            | 3 (2.2%)    | 2 (9.5%)    | 1 (0.9%)    | -                |
| Recurrent tracheo-oesophageal fistula                                                                            | 1 (0.7%)    | 1 (4.8%)    | 0 (0.0%)    | -                |
| Syndrome incompatible with life                                                                                  | 1 (0.7%)    | 1 (4.8%)    | 0 (0.0%)    | -                |
| Median duration of hospital stay, days                                                                           | 13 (17)     | 21(19)      | 10 (14)     | <b>&lt;0.001</b> |
| Did the patient have a surgical site infection?                                                                  |             |             |             |                  |
| Yes                                                                                                              | 25 (5.6%)   | 12 (8.1%)   | 13 (4.3%)   | <b>0.002</b>     |
| No                                                                                                               | 346 (77.2%) | 123 (83.1%) | 223 (74.3%) | -                |
| Not applicable, no surgical wound                                                                                | 77 (17.2%)  | 13 (8.8%)   | 64 (21.3%)  | -                |
| Did the patient have a full thickness wound dehiscence?                                                          |             |             |             |                  |
| Yes                                                                                                              | 2 (0.4%)    | 1 (0.7%)    | 1 (0.3%)    | <b>0.005</b>     |
| No                                                                                                               | 366 (81.7%) | 133 (89.9%) | 233 (77.7%) | -                |
| Not applicable, no surgical wound                                                                                | 80 (17.9%)  | 14 (9.5%)   | 66 (22.0%)  | -                |
| Did the patient require a further unplanned intervention?                                                        |             |             |             |                  |
| Yes – percutaneous                                                                                               | 11 (2.5%)   | 6 (4.1%)    | 5 (1.7%)    | <b>&lt;0.001</b> |
| Yes – surgical intervention                                                                                      | 28 (6.3%)   | 16 (10.8%)  | 12 (4.0%)   | -                |
| No                                                                                                               | 335 (74.8%) | 113 (76.4%) | 222 (74.0%) | -                |
| Not applicable – no primary intervention undertaken                                                              | 74 (16.5%)  | 13 (8.8%)   | 61 (20.3%)  | -                |
| If central line access required, did the patient acquire central line sepsis?                                    |             |             |             |                  |



|                                                                                                          |             |             |             |                  |
|----------------------------------------------------------------------------------------------------------|-------------|-------------|-------------|------------------|
| Yes, diagnosed clinically                                                                                | 9 (2.9%)    | 3 (2.2%)    | 6 (3.4%)    | 0.700            |
| Yes, confirmed on microbiology                                                                           | 16 (5.1%)   | 6 (4.3%)    | 10 (5.6%)   | -                |
| No                                                                                                       | 290 (92.1%) | 129 (93.5%) | 161 (91.0%) | -                |
| Condition specific complication within 30-days of primary surgery?                                       |             |             |             |                  |
| Air leak                                                                                                 | 33 (7.4%)   | 10 (6.8%)   | 23 (7.7%)   | 0.729            |
| Chylothorax                                                                                              | 14 (3.1%)   | 7 (4.7%)    | 7 (2.3%)    | 0.170            |
| Adhesional obstruction                                                                                   | 6 (1.3%)    | 2 (1.4%)    | 4 (1.3%)    | 0.988            |
| Pleural effusion                                                                                         | 3 (0.7%)    | 1 (0.7%)    | 2 (0.7%)    | 0.991            |
| Recurrence                                                                                               | 2 (0.4%)    | 2 (1.4%)    | 0 (0.0%)    | <b>0.044</b>     |
| Haemothorax                                                                                              | 2 (0.4%)    | 1 (0.7%)    | 1 (0.3%)    | 0.609            |
| Pneumonia                                                                                                | 2 (0.4%)    | 0 (0.0%)    | 2 (0.7%)    | 0.319            |
| Phrenic nerve palsy                                                                                      | 1 (0.2%)    | 0 (0.0%)    | 1 (0.3%)    | 0.482            |
| Other                                                                                                    | 18 (4.0%)   | 5 (3.4%)    | 13 (4.3%)   | -0.628           |
| None                                                                                                     | 280 (62.5%) | 99 (66.9%)  | 181 (60.3%) | 0.177            |
| Was the patient followed up at 30-days post primary surgery or intervention to assess for complications? |             |             |             |                  |
| Yes: reviewed in person                                                                                  | 176 (56.4%) | 70 (55.1%)  | 106 (57.3%) | <b>&lt;0.001</b> |
| Yes: via telephone consultation                                                                          | 35 (11.2%)  | 4 (3.1%)    | 31 (16.8%)  | -                |
| Yes: via other means                                                                                     | 6 (1.9%)    | 0 (0.0%)    | 6 (3.2%)    | -                |
| Yes: still an in-patient at 30-days                                                                      | 56 (17.9%)  | 34 (26.8%)  | 22 (11.9%)  | -                |
| No: data is based on in-patient observations only                                                        | 21 (6.7%)   | 15 (11.8%)  | 6 (3.2%)    | -                |
| No: follow-up was done, but prior to 30-days                                                             | 18 (5.8%)   | 4 (3.1%)    | 14 (7.6%)   | -                |
| If the patient had a complication, when was it diagnosed?                                                |             |             |             |                  |
| During the primary admission                                                                             | 127 (28.3%) | 42 (28.4%)  | 85 (28.3%)  | 0.760            |
| As an emergency re-attender                                                                              | 6 (1.3%)    | 1 (0.7%)    | 5 (1.7%)    | -                |
| At routine follow-up as an out-patient                                                                   | 5 (1.1%)    | 1 (0.7%)    | 4 (1.3%)    | -                |
| Not applicable, no complications                                                                         | 309 (69.0%) | 104 (70.3%) | 205 (68.3%) | -                |
| Missing                                                                                                  | 1 (0.2%)    | 0 (0.0%)    | 1 (0.3%)    | -                |

\*Only 1 patient was from a LIC and hence patients from MIC and LICs were combined in this table. †patients born in hospital = 0. Percentages have been rounded to 1 decimal place and may not total 100.0%. CDH: Congenital diaphragmatic hernia. HIC: High-income countries. IQR: Interquartile range. LMIC: Low- and middle-income countries.

**Supplementary Table 3: Characteristics, perioperative care, surgical interventions, and outcomes for patients with intestinal atresia**

| Variable                                                                                | Total (n=681) | HIC (n=152)  | MIC (n=509)  | LIC (n=20)  | P value      |
|-----------------------------------------------------------------------------------------|---------------|--------------|--------------|-------------|--------------|
| <b>Patient Characteristics:</b>                                                         |               |              |              |             |              |
| Median gestational age at birth (IQR), weeks                                            | 37 (3)        | 37 (3)       | 37 (3)       | 36 (2)      | 0.262        |
| Median age at presentation (IQR), hours                                                 | 24 (72)       | 0 (25)       | 36 (94)      | 96 (92)     | <0.001       |
| Sex:                                                                                    |               |              |              |             |              |
| Male                                                                                    | 336 (49.3%)   | 73 (48.0%)   | 256 (50.3%)  | 7 (35.0%)   | 0.610        |
| Female                                                                                  | 343 (50.4%)   | 79 (52.0%)   | 251 (49.3%)  | 13 (65.0%)  | -            |
| Ambiguous                                                                               | 2 (0.3%)      | 0 (0.0%)     | 2 (0.4%)     | 0 (0.0%)    | -            |
| Median weight at presentation (IQR), kg                                                 | 2.5 (1.0)     | 2.7 (1.1)    | 2.4 (1.0)    | 2.2 (0.7)   | 0.124        |
| Does the patient have another anomaly in addition to the study condition?               |               |              |              |             |              |
| Yes: Cardiovascular                                                                     | 151 (22.2%)   | 49 (32.2%)   | 98 (19.3%)   | 4 (20.0%)   | <b>0.003</b> |
| Yes: Respiratory                                                                        | 20 (2.9%)     | 7 (4.6%)     | 13 (2.6%)    | 0 (0.0%)    | 0.309        |
| Yes: Gastrointestinal                                                                   | 81 (11.9%)    | 24 (15.8%)   | 56 (11.0%)   | 1 (5.0%)    | 0.174        |
| Yes: Neurological                                                                       | 23 (3.4%)     | 7 (4.6%)     | 16 (3.1%)    | 0 (0.0%)    | 0.476        |
| Yes: Genito-urinary                                                                     | 34 (5.0%)     | 10 (6.6%)    | 24 (4.7%)    | 0 (0.0%)    | 0.379        |
| Yes: Musculoskeletal                                                                    | 18 (2.6%)     | 6 (3.9%)     | 12 (2.4%)    | 0 (0.0%)    | 0.425        |
| Yes: Down syndrome                                                                      | 65 (9.5%)     | 17 (11.2%)   | 48 (9.4%)    | 0 (0.0%)    | 0.274        |
| Yes: Beckwith Wiedemann syndrome                                                        | 0 (0.0%)      | 0 (0.0%)     | 0 (0.0%)     | 0 (0.0%)    | -            |
| Yes: Cystic fibrosis                                                                    | 5 (0.7%)      | 2 (1.3%)     | 2 (0.4%)     | 1 (5.0%)    | <b>0.039</b> |
| Yes: Chromosomal                                                                        | 14 (2.1%)     | 5 (3.3%)     | 9 (1.8%)     | 0 (0.0%)    | 0.411        |
| Yes: Other                                                                              | 36 (5.3%)     | 7 (4.6%)     | 29 (5.7%)    | 0 (0.0%)    | 0.489        |
| No                                                                                      | 402 (59.0%)   | 80 (52.6%)   | 307 (60.3%)  | 15 (75.0%)  | <b>0.081</b> |
| Median distance from patient's home to hospital (IQR), km*                              | 19 (96)       | 6 (46)       | 25 (108)     | 28 (109)    | <0.001       |
| Type of delivery:                                                                       |               |              |              |             |              |
| Vaginal (spontaneous)                                                                   | 333 (48.9%)   | 68 (44.7%)   | 248 (48.7%)  | 17 (85.0%)  | <0.001       |
| Vaginal (induced)                                                                       | 20 (2.9%)     | 12 (7.9%)    | 8 (1.6%)     | 0 (0.0%)    | -            |
| Caesarean section (elective)                                                            | 145 (21.3%)   | 24 (15.8%)   | 120 (23.6%)  | 1 (5.0%)    | -            |
| Caesarean section (urgent/non-elective)                                                 | 181 (26.6%)   | 48 (31.6%)   | 131 (25.7%)  | 2 (10.0%)   | -            |
| Unknown                                                                                 | 2 (0.3%)      | 0 (0.0%)     | 2 (0.4%)     | 0 (0.0%)    | -            |
| Was the patient septic on arrival to your hospital?                                     |               |              |              |             |              |
| Yes                                                                                     | 141 (20.7%)   | 3 (2.0%)     | 127 (25.0%)  | 11 (55.0%)  | <0.001       |
| No                                                                                      | 540 (79.3%)   | 149 (98.0%)  | 382 (75.0%)  | 9 (45.0%)   | -            |
| Was the patient hypovolaemic on arrival to your hospital?                               |               |              |              |             |              |
| Yes                                                                                     | 142 (20.9%)   | 12 (7.9%)    | 124 (24.4%)  | 6 (30.0%)   | <0.001       |
| No                                                                                      | 539 (79.1%)   | 140 (92.1%)  | 385 (75.6%)  | 14 (70.0%)  | -            |
| Was the patient hypothermic on arrival to your hospital?                                |               |              |              |             |              |
| Yes                                                                                     | 74 (10.9%)    | 9 (5.9%)     | 62 (12.2%)   | 3 (15.0%)   | <b>0.077</b> |
| No                                                                                      | 606 (89.0%)   | 143 (94.1%)  | 446 (87.6%)  | 17 (85.0%)  | -            |
| Missing                                                                                 | 1 (0.1%)      | 0 (0.0%)     | 1 (0.2%)     | 0 (0.0%)    | -            |
| American Society of Anaesthesiologists (ASA) Score at the time of primary intervention: |               |              |              |             |              |
| 1. Healthy person                                                                       | 99 (14.5%)    | 19 (12.5%)   | 76 (14.9%)   | 4 (20.0%)   | <b>0.009</b> |
| 2. Mild systemic disease                                                                | 220 (32.3%)   | 47 (30.9%)   | 163 (32.0%)  | 10 (50.0%)  | -            |
| 3. Severe systemic disease                                                              | 239 (35.1%)   | 59 (38.8%)   | 177 (34.8%)  | 3 (15.0%)   | -            |
| 4. Severe systemic disease that is a constant threat to life                            | 57 (8.4%)     | 20 (13.2%)   | 36 (7.1%)    | 1 (5.0%)    | -            |
| 5. A moribund patient who is not expected to survive without the operation              | 40 (5.9%)     | 2 (1.3%)     | 38 (7.5%)    | 0 (0.0%)    | -            |
| Not applicable - no intervention                                                        | 24 (3.5%)     | 3 (2.0%)     | 19 (3.7%)    | 2 (10.0%)   | -            |
| Missing                                                                                 | 2 (0.3%)      | 2 (1.3%)     | 0 (0.0%)     | 0 (0.0%)    | -            |
| What study condition does the patient have?                                             |               |              |              |             |              |
| Oesophageal atresia                                                                     | 18 (2.6%)     | 7 (4.6%)     | 11 (2.2%)    | 0 (0.0%)    | 0.194        |
| Congenital diaphragmatic hernia                                                         | 0 (0.0%)      | 0 (0.0%)     | 0 (0.0%)     | 0 (0.0%)    | -            |
| Intestinal atresia                                                                      | 681 (100.0%)  | 152 (100.0%) | 509 (100.0%) | 20 (100.0%) | -            |
| Gastroschisis                                                                           | 17 (2.5%)     | 8 (5.3%)     | 9 (1.8%)     | 0 (0.0%)    | <b>0.041</b> |
| Exomphalos/Omphalocele                                                                  | 8 (1.2%)      | 3 (2.0%)     | 5 (1.0%)     | 0 (0.0%)    | 0.539        |
| Anorectal malformation                                                                  | 12 (1.8%)     | 3 (2.0%)     | 9 (1.8%)     | 0 (0.0%)    | 0.819        |
| Hirschsprung's Disease                                                                  | 3 (0.4%)      | 2 (1.3%)     | 1 (0.2%)     | 0 (0.0%)    | 0.180        |
| Type of intestinal atresia?                                                             |               |              |              |             |              |
| Duodenal (DA)                                                                           | 279 (41.0%)   | 83 (54.6%)   | 189 (37.1%)  | 7 (35.0%)   | <0.001       |
| Jejuno-ileal (JIA)                                                                      | 369 (54.2%)   | 57 (37.5%)   | 300 (58.9%)  | 12 (60.0%)  | -            |
| Colonic (CA)                                                                            | 31 (4.6%)     | 11 (7.2%)    | 19 (3.7%)    | 1 (5.0%)    | -            |
| Missing                                                                                 | 2 (0.3%)      | 1 (0.7%)     | 1 (0.2%)     | 0 (0.0%)    | -            |
| Classification of duodenal or colonic atresia?                                          |               |              |              |             |              |
| 1                                                                                       | 162 (52.4%)   | 38 (40.4%)   | 119 (57.5%)  | 5 (62.5%)   | <b>0.070</b> |
| 2                                                                                       | 73 (23.6%)    | 26 (27.7%)   | 44 (21.3%)   | 3 (37.5%)   | -            |
| 3                                                                                       | 69 (22.3%)    | 29 (30.9%)   | 40 (19.3%)   | 0 (0.0%)    | -            |
| 4                                                                                       | 5 (1.6%)      | 1 (1.1%)     | 4 (1.9%)     | 0 (0.0%)    | -            |
| Classification of jejuno-ileal atresia                                                  |               |              |              |             |              |

|                                                                                                          |             |             |             |            |                  |
|----------------------------------------------------------------------------------------------------------|-------------|-------------|-------------|------------|------------------|
| 1                                                                                                        | 77 (20.8%)  | 9 (15.8%)   | 64 (21.3%)  | 4 (33.3%)  | <b>0.014</b>     |
| 2                                                                                                        | 72 (19.5%)  | 20 (35.1%)  | 50 (16.6%)  | 2 (16.7%)  | -                |
| 3a                                                                                                       | 115 (31.1%) | 16 (28.1%)  | 97 (32.2%)  | 2 (16.7%)  | -                |
| 3b                                                                                                       | 45 (12.2%)  | 5 (8.8%)    | 36 (12.0%)  | 4 (33.3%)  | -                |
| 4                                                                                                        | 61 (16.5%)  | 7 (12.3%)   | 54 (17.9%)  | 0 (0.0%)   | -                |
| <b>Care prior to presentation at the paediatric surgery centre:</b>                                      |             |             |             |            |                  |
| Antenatal ultrasound undertaken?                                                                         |             |             |             |            |                  |
| Yes: study condition diagnosed                                                                           | 194 (28.5%) | 77 (50.7%)  | 117 (23.0%) | 0 (0.0%)   | <b>&lt;0.001</b> |
| Yes: problem identified but study condition not diagnosed                                                | 136 (20.0%) | 31 (20.4%)  | 100 (19.6%) | 5 (25.0%)  | -                |
| Yes: no problem identified                                                                               | 264 (38.8%) | 39 (25.7%)  | 217 (42.6%) | 8 (40.0%)  | -                |
| No                                                                                                       | 85 (12.5%)  | 4 (2.6%)    | 74 (14.5%)  | 7 (35.0%)  | -                |
| Missing                                                                                                  | 2 (0.3%)    | 1 (0.7%)    | 1 (0.2%)    | 0 (0.0%)   | -                |
| Median gestational age of study condition diagnosis if diagnosis was antenatal (IQR), weeks              | 30 (10)     | 30 (22)     | 30 (8)      | -          | 0.914            |
| Mode of transport to hospital:                                                                           |             |             |             |            |                  |
| Ambulance                                                                                                | 264 (38.8%) | 58 (38.2%)  | 201 (39.5%) | 5 (25.0%)  | <b>&lt;0.001</b> |
| Other transport provided by the health service                                                           | 46 (6.8%)   | 10 (6.6%)   | 30 (5.9%)   | 6 (30.0%)  | -                |
| Patient's own transport                                                                                  | 155 (22.8%) | 3 (2.0%)    | 143 (28.1%) | 9 (45.0%)  | -                |
| Born within the hospital                                                                                 | 214 (31.4%) | 81 (53.3%)  | 133 (26.1%) | 0 (0.0%)   | -                |
| Missing                                                                                                  | 2 (0.3%)    | 0 (0.0%)    | 2 (0.4%)    | 0 (0.0%)   | -                |
| If outborn, where did the patient present from?                                                          |             |             |             |            |                  |
| Home                                                                                                     | 56 (12.0%)  | 1 (1.4%)    | 53 (14.2%)  | 2 (10.0%)  | <b>&lt;0.001</b> |
| Community Clinic/General Practice                                                                        | 74 (15.9%)  | 4 (5.6%)    | 66 (17.6%)  | 4 (20.0%)  | -                |
| District Hospital                                                                                        | 328 (70.5%) | 63 (88.7%)  | 253 (67.6%) | 12 (60.0%) | -                |
| From another country                                                                                     | 1 (0.2%)    | 1 (1.4%)    | 0 (0.0%)    | 0 (0.0%)   | -                |
| From a different speciality within the study centre                                                      | 3 (0.6%)    | 2 (2.8%)    | 0 (0.0%)    | 1 (5.0%)   | -                |
| Unknown                                                                                                  | 3 (0.6%)    | 0 (0.0%)    | 2 (0.5%)    | 1 (5.0%)   | -                |
| <b>Perioperative care at the paediatric surgery centre:</b>                                              |             |             |             |            |                  |
| If septic, were appropriate antibiotics administered?                                                    |             |             |             |            |                  |
| Yes within 1 hour of arrival                                                                             | 106 (75.2%) | 3 (100.0%)  | 96 (75.6%)  | 7 (63.6%)  | 0.190            |
| Yes: within the first day of arrival                                                                     | 33 (23.4%)  | 0 (0.0%)    | 30 (23.6%)  | 3 (27.3%)  | -                |
| No                                                                                                       | 2 (1.4%)    | 0 (0.0%)    | 1 (0.8%)    | 1 (9.1%)   | -                |
| If hypovolaemic, was an intravenous fluid bolus given?                                                   |             |             |             |            |                  |
| Yes within 1 hour of arrival                                                                             | 110 (77.5%) | 7 (58.3%)   | 99 (79.8%)  | 4 (66.7%)  | 0.400            |
| Yes: within the first day of arrival                                                                     | 26 (18.3%)  | 4 (33.3%)   | 20 (16.1%)  | 2 (33.3%)  | -                |
| No                                                                                                       | 6 (4.2%)    | 1 (8.3%)    | 5 (4.0%)    | 0 (0.0%)   | -                |
| If hypovolaemic, how much intravenous fluid was given?                                                   |             |             |             |            |                  |
| 10 - 20mls/kg                                                                                            | 98 (72.1%)  | 7 (63.6%)   | 86 (72.3%)  | 5 (83.3%)  | 0.680            |
| Above 20mls/kg                                                                                           | 38 (27.9%)  | 4 (36.4%)   | 33 (27.7%)  | 1 (16.7%)  | -                |
| If hypothermic, was the patient warmed on arrival to your hospital to within a normal temperature range? |             |             |             |            |                  |
| Yes                                                                                                      | 69 (93.2%)  | 7 (77.8%)   | 59 (95.2%)  | 3 (100.0%) | 0.140            |
| No                                                                                                       | 5 (6.8%)    | 2 (22.2%)   | 3 (4.8%)    | 0 (0.0%)   | -                |
| Did the patient receive central venous access?                                                           |             |             |             |            |                  |
| Yes: umbilical catheter                                                                                  | 69 (10.1%)  | 20 (13.2%)  | 49 (9.6%)   | 0 (0.0%)   | 0.140            |
| Yes: peripherally inserted central catheter (PICC)                                                       | 268 (39.4%) | 99 (65.1%)  | 168 (33.0%) | 1 (5.0%)   | <b>&lt;0.001</b> |
| Yes: percutaneously inserted central line with ultrasound guidance                                       | 106 (15.6%) | 40 (26.3%)  | 66 (13.0%)  | 0 (0.0%)   | <b>&lt;0.001</b> |
| Yes: surgically placed central line (open insertion)                                                     | 60 (8.8%)   | 6 (3.9%)    | 54 (10.6%)  | 0 (0.0%)   | <b>0.015</b>     |
| No                                                                                                       | 234 (34.4%) | 13 (8.6%)   | 202 (39.7%) | 19 (95.0%) | <b>&lt;0.001</b> |
| Duration of antibiotics following primary intervention (days), median (IQR)                              | 8 (10)      | 4 (5)       | 10 (9)      | 5 (7)      | <b>&lt;0.001</b> |
| Did the patient receive a blood transfusion?                                                             |             |             |             |            |                  |
| Yes: not cross-matched                                                                                   | 20 (2.9%)   | 4 (2.6%)    | 16 (3.1%)   | 0 (0.0%)   | <b>&lt;0.001</b> |
| Yes: cross-matched.                                                                                      | 334 (49.0%) | 41 (27.0%)  | 283 (55.6%) | 10 (50.0%) | -                |
| No: not required.                                                                                        | 322 (47.3%) | 106 (69.7%) | 206 (40.5%) | 10 (50.0%) | -                |
| No: it was required but not available.                                                                   | 5 (0.7%)    | 1 (0.7%)    | 4 (0.8%)    | 0 (0.0%)   | <b>&lt;0.001</b> |
| Did the patient require ventilation?                                                                     |             |             |             |            |                  |
| Yes: and it was given                                                                                    | 370 (54.3%) | 117 (77.0%) | 252 (49.5%) | 1 (5.0%)   | <b>&lt;0.001</b> |
| Yes, but it was not available                                                                            | 21 (3.1%)   | 1 (0.7%)    | 17 (3.3%)   | 3 (15.0%)  | -                |
| No                                                                                                       | 290 (42.6%) | 34 (22.4%)  | 240 (47.2%) | 16 (80.0%) | -                |
| Median time patient remained on ventilation if given (IQR), days                                         | 3 (4)       | 3 (4)       | 3 (4)       | 3 (0)      | 0.952            |
| Median time to first enteral feed (post-primary intervention) (IQR), days                                | 7 (5)       | 7 (5)       | 7 (6)       | 3 (4)      | <b>&lt;0.001</b> |
| Median time to full enteral feeds (post-primary intervention) (IQR), days                                | 14 (13)     | 16 (17)     | 13 (12)     | 5 (3)      | <b>&lt;0.001</b> |
| Did the patient require parenteral nutrition?                                                            |             |             |             |            |                  |
| Yes: and it was given                                                                                    | 490 (72.0%) | 141 (92.8%) | 347 (68.2%) | 2 (10.0%)  | <b>&lt;0.001</b> |
| Yes: and it was sometimes available, but less than required                                              | 37 (5.4%)   | 0 (0.0%)    | 37 (7.3%)   | 0 (0.0%)   | -                |
| Yes: but it was not available                                                                            | 48 (7.0%)   | 0 (0.0%)    | 37 (7.3%)   | 11 (55.0%) | -                |
| No                                                                                                       | 106 (15.6%) | 11 (7.2%)   | 88 (17.3%)  | 7 (35.0%)  | -                |
| Median time patient received parenteral nutrition if received (IQR), days                                | 14 (12)     | 15 (12)     | 14 (12)     | 20 (20)    | 0.055            |
| <b>Surgical intervention:</b>                                                                            |             |             |             |            |                  |
| Time from arrival to primary intervention in hours, median (IQR)                                         | 25 (52)     | 22 (28)     | 28 (57)     | 48 (84)    | <b>&lt;0.001</b> |
| Primary intervention for patients with duodenal atresia:                                                 |             |             |             |            |                  |
| Duodenoduodenostomy                                                                                      | 200 (71.9%) | 62 (74.7%)  | 134 (71.3%) | 4 (57.1%)  | 0.69             |

|                                                                                                                  |             |             |             |            |                  |
|------------------------------------------------------------------------------------------------------------------|-------------|-------------|-------------|------------|------------------|
| Duodenojejunostomy                                                                                               | 39 (14.0%)  | 10 (12.0%)  | 28 (14.9%)  | 1 (14.3%)  | -                |
| Web excision only                                                                                                | 20 (7.2%)   | 7 (8.4%)    | 12 (6.4%)   | 1 (14.3%)  | -                |
| Palliation                                                                                                       | 9 (3.2%)    | 1 (1.2%)    | 7 (3.7%)    | 1 (14.3%)  | -                |
| Other                                                                                                            | 10 (3.6%)   | 3 (3.6%)    | 7 (3.7%)    | 0 (0.0%)   | -                |
| Surgical approach for patients with duodenal atresia:                                                            |             |             |             |            |                  |
| Laparotomy                                                                                                       | 224 (87.8%) | 59 (74.7%)  | 159 (93.5%) | 6 (100.0%) | <b>0.002</b>     |
| Laparoscopy                                                                                                      | 26 (10.2%)  | 18 (22.8%)  | 8 (4.7%)    | 0 (0.0%)   | -                |
| Endoscopy                                                                                                        | 1 (0.4%)    | 0 (0.0%)    | 1 (0.6%)    | 0 (0.0%)   | -                |
| Other                                                                                                            | 4 (1.6%)    | 2 (2.5%)    | 2 (1.2%)    | 0 (0.0%)   | -                |
| Type of anastomosis for patients with duodenal atresia:                                                          |             |             |             |            |                  |
| Kimura's diamond shape                                                                                           | 162 (68.9%) | 49 (68.1%)  | 112 (70.9%) | 1 (20.0%)  | 0.180            |
| Side-to-side                                                                                                     | 50 (21.3%)  | 15 (20.8%)  | 32 (20.3%)  | 3 (60.0%)  | -                |
| End-to-end                                                                                                       | 23 (9.8%)   | 8 (11.1%)   | 14 (8.9%)   | 1 (20.0%)  | -                |
| Primary intervention for JIA or CA?                                                                              |             |             |             |            |                  |
| Primary anastomosis                                                                                              | 264 (66.0%) | 43 (63.2%)  | 214 (67.1%) | 7 (53.8%)  | <b>0.011</b>     |
| Bowel resection                                                                                                  | 170 (42.5%) | 24 (35.3%)  | 144 (45.1%) | 2 (15.4%)  | <b>0.037</b>     |
| Divided stoma                                                                                                    | 50 (12.5%)  | 15 (22.1%)  | 34 (10.7%)  | 1 (7.7%)   | 0.713            |
| Division of web only                                                                                             | 16 (4.0%)   | 2 (2.9%)    | 13 (4.1%)   | 1 (7.7%)   | 0.250            |
| Santulli stoma                                                                                                   | 15 (3.8%)   | 0 (0.0%)    | 15 (4.7%)   | 0 (0.0%)   | 0.096            |
| Loop stoma                                                                                                       | 14 (3.5%)   | 2 (2.9%)    | 11 (3.4%)   | 1 (7.7%)   | 0.317            |
| Bishop-Koop stoma                                                                                                | 10 (2.5%)   | 1 (1.5%)    | 8 (2.5%)    | 1 (7.7%)   | 0.175            |
| Palliation                                                                                                       | 8 (2.0%)    | 3 (4.4%)    | 5 (1.6%)    | 0 (0.0%)   | 0.272            |
| Other                                                                                                            | 27 (6.8%)   | 3 (4.4%)    | 23 (7.2%)   | 1 (7.7%)   | 0.170            |
| Surgical approach for patients with JIA or CA?                                                                   |             |             |             |            |                  |
| Laparotomy                                                                                                       | 327 (95.9%) | 51 (96.2%)  | 267 (96.0%) | 9 (90.0%)  | 0.43             |
| Laparoscopy                                                                                                      | 8 (2.3%)    | 1 (1.9%)    | 7 (2.5%)    | 0 (0.0%)   | -                |
| Endoscopy                                                                                                        | 1 (0.3%)    | 0 (0.0%)    | 1 (0.4%)    | 0 (0.0%)   | -                |
| Other                                                                                                            | 5 (1.5%)    | 1 (1.9%)    | 3 (1.1%)    | 1 (10.0%)  | -                |
| Conversion to open procedure for all patients undergoing laparoscopy or endoscopy (DA, JIA or CA)?               |             |             |             |            |                  |
| Yes                                                                                                              | 6 (16.7%)   | 1 (5.3%)    | 5 (29.4%)   | -          | <b>0.052</b>     |
| No                                                                                                               | 30 (83.3%)  | 18 (94.7%)  | 12 (70.6%)  | -          | -                |
| Was the distal bowel flushed to check for patency?                                                               |             |             |             |            |                  |
| Yes                                                                                                              | 442 (83.2%) | 78 (62.9%)  | 351 (89.3%) | 13 (92.9%) | <b>&lt;0.001</b> |
| No                                                                                                               | 89 (16.8%)  | 46 (37.1%)  | 42 (10.7%)  | 1 (7.1%)   | -                |
| Median length of bowel excised in patients undergoing a bowel resection, in cm (IQR)                             |             |             |             |            |                  |
|                                                                                                                  | 15 (15)     | 11 (14)     | 15 (15)     | 50 (20)    | <b>0.026</b>     |
| What type of anaesthesia was used for the primary intervention?                                                  |             |             |             |            |                  |
| General anaesthesia with endotracheal tube                                                                       | 655 (96.2%) | 149 (98.0%) | 489 (96.1%) | 17 (85.0%) | 0.160            |
| General anaesthesia with laryngeal airway                                                                        | 4 (0.6%)    | 0 (0.0%)    | 3 (0.6%)    | 1 (5.0%)   | -                |
| Ketamine anaesthesia                                                                                             | 0 (0.0%)    | 0 (0.0%)    | 0 (0.0%)    | 0 (0.0%)   | -                |
| Spinal/caudal anaesthesia                                                                                        | 0 (0.0%)    | 0 (0.0%)    | 0 (0.0%)    | 0 (0.0%)   | -                |
| Local anaesthesia only                                                                                           | 2 (0.3%)    | 0 (0.0%)    | 2 (0.4%)    | 0 (0.0%)   | -                |
| No anaesthesia, just analgesia                                                                                   | 1 (0.1%)    | 0 (0.0%)    | 1 (0.2%)    | 0 (0.0%)   | -                |
| No anaesthesia, no analgesia                                                                                     | 2 (0.3%)    | 0 (0.0%)    | 2 (0.4%)    | 0 (0.0%)   | -                |
| Not applicable: no surgery or primary intervention undertaken                                                    | 17 (2.5%)   | 3 (2.0%)    | 12 (2.4%)   | 2 (10.0%)  | -                |
| Who undertook the anaesthetic for the primary intervention?                                                      |             |             |             |            |                  |
| Anaesthetic doctor                                                                                               | 646 (94.9%) | 144 (94.7%) | 488 (95.9%) | 14 (70.0%) | <b>&lt;0.001</b> |
| Anaesthetic nurse                                                                                                | 9 (1.3%)    | 1 (0.7%)    | 4 (0.8%)    | 4 (20.0%)  | -                |
| Medical officer                                                                                                  | 2 (0.3%)    | 2 (1.3%)    | 0 (0.0%)    | 0 (0.0%)   | -                |
| Surgeon                                                                                                          | 2 (0.3%)    | 0 (0.0%)    | 2 (0.4%)    | 0 (0.0%)   | -                |
| Other healthcare professional                                                                                    | 2 (0.3%)    | 2 (1.3%)    | 0 (0.0%)    | 0 (0.0%)   | -                |
| No anaesthetic undertaken                                                                                        | 20 (2.9%)   | 3 (2.0%)    | 15 (2.9%)   | 2 (10.0%)  | -                |
| Who undertook the primary intervention?                                                                          |             |             |             |            |                  |
| Paediatric surgeon (or junior with paediatric surgeon assisting/in the room)                                     | 654 (96.0%) | 149 (98.0%) | 489 (96.1%) | 16 (80.0%) | <b>0.007</b>     |
| General surgeon (or junior with general surgeon assisting/in the room)                                           | 6 (0.9%)    | 1 (0.7%)    | 4 (0.8%)    | 1 (5.0%)   | -                |
| Junior doctor, medical officer or other (without a paediatric or general surgeon assisting/in the room)          | 2 (0.3%)    | 0 (0.0%)    | 2 (0.4%)    | 0 (0.0%)   | -                |
| Trainee surgeon (without a paediatric or general surgeon assisting or in the room)                               | 3 (0.4%)    | 0 (0.0%)    | 2 (0.4%)    | 1 (5.0%)   | -                |
| Not applicable - no surgery or primary intervention undertaken.                                                  | 16 (2.3%)   | 2 (1.3%)    | 12 (2.4%)   | 2 (10.0%)  | -                |
| Was a Surgical Safety Checklist used at the time of primary intervention?                                        |             |             |             |            |                  |
| Yes                                                                                                              | 530 (77.8%) | 144 (94.7%) | 378 (74.3%) | 8 (40.0%)  | <b>&lt;0.001</b> |
| No: but it was available                                                                                         | 68 (10.0%)  | 4 (2.6%)    | 58 (11.4%)  | 6 (30.0%)  | -                |
| No: it was not available                                                                                         | 66 (9.7%)   | 1 (0.7%)    | 61 (12.0%)  | 4 (20.0%)  | -                |
| Not applicable: a conservative primary intervention was undertaken                                               | 3 (0.4%)    | 1 (0.7%)    | 2 (0.4%)    | 0 (0.0%)   | -                |
| Not applicable: no surgery or primary intervention undertaken                                                    | 14 (2.1%)   | 2 (1.3%)    | 10 (2.0%)   | 2 (10.0%)  | -                |
| <b>Outcomes:</b>                                                                                                 |             |             |             |            |                  |
| Did the patient survive to discharge (or 30-days if still an in-patient 30-days following primary intervention)? |             |             |             |            |                  |
| Yes                                                                                                              | 555 (81.5%) | 147 (96.7%) | 400 (78.6%) | 8 (40.0%)  | <b>&lt;0.001</b> |
| No                                                                                                               | 126 (18.5%) | 5 (3.3%)    | 109 (21.4%) | 12 (60.0%) | -                |
| If the patient was discharged prior, were they still alive at 30-days following primary intervention?            |             |             |             |            |                  |

|                                                                                                          |             |             |             |            |                  |
|----------------------------------------------------------------------------------------------------------|-------------|-------------|-------------|------------|------------------|
| Yes                                                                                                      | 508 (92.2%) | 141 (97.2%) | 362 (91.0%) | 5 (62.5%)  | <b>&lt;0.001</b> |
| No                                                                                                       | 2 (0.4%)    | 0 (0.0%)    | 2 (0.5%)    | 0 (0.0%)   | -                |
| Not followed-up after discharge                                                                          | 21 (3.8%)   | 2 (1.4%)    | 16 (4.0%)   | 3 (37.5%)  | -                |
| Followed-up, but not until 30-days post primary intervention                                             | 20 (3.6%)   | 2 (1.4%)    | 18 (4.5%)   | 0 (0.0%)   | -                |
| Cause of mortality:                                                                                      |             |             |             |            |                  |
| Sepsis                                                                                                   | 67 (52.3%)  | 0 (0.0%)    | 63 (56.8%)  | 4 (33.3%)  | <b>0.001</b>     |
| Respiratory failure                                                                                      | 17 (13.3%)  | 1 (20.0%)   | 15 (13.5%)  | 1 (8.3%)   | -                |
| Cardiac failure                                                                                          | 14 (10.9%)  | 4 (80.0%)   | 9 (8.1%)    | 1 (8.3%)   | -                |
| Anastomotic leak                                                                                         | 8 (6.3%)    | 0 (0.0%)    | 6 (5.4%)    | 2 (16.7%)  | -                |
| Aspiration pneumonia                                                                                     | 7 (5.5%)    | 0 (0.0%)    | 5 (4.5%)    | 2 (16.7%)  | -                |
| Malnutrition                                                                                             | 4 (3.1%)    | 0 (0.0%)    | 4 (3.6%)    | 0 (0.0%)   | -                |
| Electrolyte disturbance                                                                                  | 4 (3.1%)    | 0 (0.0%)    | 3 (2.7%)    | 1 (8.3%)   | -                |
| Haemorrhage                                                                                              | 2 (1.6%)    | 0 (0.0%)    | 1 (0.9%)    | 1 (8.3%)   | -                |
| Other                                                                                                    | 5 (3.9%)    | 0 (0.0%)    | 5 (4.5%)    | 0 (0.0%)   | -                |
| Median duration of hospital stay in days (IQR)                                                           | 19 (17)     | 24 (13)     | 18 (15)     | 11 (9)     | <b>&lt;0.001</b> |
| Did the patient have a surgical site infection?                                                          |             |             |             |            |                  |
| Yes                                                                                                      | 71 (10.4%)  | 16 (10.5%)  | 53 (10.4%)  | 2 (10.0%)  | 0.590            |
| No                                                                                                       | 586 (86.0%) | 132 (86.8%) | 438 (86.1%) | 16 (80.0%) | -                |
| Not applicable, no surgical wound                                                                        | 24 (3.5%)   | 4 (2.6%)    | 18 (3.5%)   | 2 (10.0%)  | -                |
| Did the patient have a full thickness wound dehiscence?                                                  |             |             |             |            |                  |
| Yes                                                                                                      | 17 (2.5%)   | 2 (1.3%)    | 15 (2.9%)   | 0 (0.0%)   | 0.390            |
| No                                                                                                       | 639 (93.8%) | 145 (95.4%) | 476 (93.5%) | 18 (90.0%) | -                |
| Not applicable, no surgical wound                                                                        | 25 (3.7%)   | 5 (3.3%)    | 18 (3.5%)   | 2 (10.0%)  | -                |
| Did the patient require a further unplanned intervention?                                                |             |             |             |            |                  |
| Yes – percutaneous                                                                                       | 5 (0.7%)    | 2 (1.3%)    | 3 (0.6%)    | 0 (0.0%)   | 0.340            |
| Yes – surgical intervention                                                                              | 102 (15.0%) | 19 (12.5%)  | 78 (15.3%)  | 5 (25.0%)  | -                |
| No                                                                                                       | 552 (81.1%) | 127 (83.6%) | 412 (80.9%) | 13 (65.0%) | -                |
| Not applicable – no primary intervention undertaken                                                      | 22 (3.2%)   | 4 (2.6%)    | 16 (3.1%)   | 2 (10.0%)  | -                |
| If central line access was used, did the patient acquire central line sepsis?                            |             |             |             |            |                  |
| Yes, diagnosed clinically                                                                                | 24 (5.4%)   | 6 (4.3%)    | 18 (5.8%)   | 0 (0.0%)   | 0.610            |
| Yes, confirmed on microbiology                                                                           | 30 (6.7%)   | 13 (9.4%)   | 17 (5.5%)   | 0 (0.0%)   | -                |
| No                                                                                                       | 394 (87.9%) | 120 (86.3%) | 273 (88.6%) | 1 (100.0%) | -                |
| Condition specific complications within 30-days of primary intervention:                                 |             |             |             |            |                  |
| Anastomotic leak                                                                                         | 57 (8.4%)   | 0 (0.0%)    | 52 (10.2%)  | 5 (25.0%)  | <b>&lt;0.001</b> |
| Short-gut                                                                                                | 26 (3.8%)   | 4 (2.6%)    | 22 (4.3%)   | 0 (0.0%)   | 0.421            |
| Adhesive bowel obstruction                                                                               | 23 (3.4%)   | 3 (2.0%)    | 20 (3.9%)   | 0 (0.0%)   | 0.351            |
| Anastomotic stenosis                                                                                     | 19 (2.8%)   | 4 (2.6%)    | 13 (2.6%)   | 2 (10.0%)  | 0.139            |
| Stoma prolapse                                                                                           | 8 (1.2%)    | 4 (2.6%)    | 4 (0.8%)    | 0 (0.0%)   | 0.159            |
| Difficulty establishing/ tolerating enteral feeds/intestinal dysmotility                                 | 7 (1.0%)    | 1 (0.7%)    | 6 (1.2%)    | 0 (0.0%)   | 0.769            |
| Parastomal skin breakdown                                                                                | 6 (0.9%)    | 0 (0.0%)    | 5 (1.0%)    | 1 (5.0%)   | 0.071            |
| Stoma retraction                                                                                         | 5 (0.7%)    | 1 (0.7%)    | 4 (0.8%)    | 0 (0.0%)   | 0.915            |
| Pneumonia (aspiration pneumonia or pneumonia)                                                            | 5 (0.7%)    | 0 (0.0%)    | 4 (0.8%)    | 1 (5.0%)   | <b>0.047</b>     |
| Missed additional atresia                                                                                | 4 (0.6%)    | 0 (0.0%)    | 4 (0.8%)    | 0 (0.0%)   | 0.507            |
| Bowel perforation                                                                                        | 4 (0.6%)    | 3 (2.0%)    | 1 (0.2%)    | 0 (0.0%)   | <b>0.040</b>     |
| Electrolyte disturbance                                                                                  | 4 (0.6%)    | 0 (0.0%)    | 4 (0.8%)    | 0 (0.0%)   | 0.507            |
| High output stoma                                                                                        | 3 (0.4%)    | 3 (2.0%)    | 0 (0.0%)    | 0 (0.0%)   | <b>0.005</b>     |
| Other bowel pathology                                                                                    | 3 (0.4%)    | 3 (2.0%)    | 0 (0.0%)    | 0 (0.0%)   | <b>0.005</b>     |
| N/A, No intervention                                                                                     | 3 (0.4%)    | 0 (0.0%)    | 2 (0.4%)    | 1 (5.0%)   | <b>0.006</b>     |
| Bleeding                                                                                                 | 2 (0.3%)    | 0 (0.0%)    | 1 (0.2%)    | 1 (5.0%)   | <b>&lt;0.001</b> |
| Persistent intestinal (duodenal/jejunal) dilatation                                                      | 1 (0.1%)    | 0 (0.0%)    | 1 (0.2%)    | 0 (0.0%)   | 0.844            |
| NEC                                                                                                      | 1 (0.1%)    | 1 (0.7%)    | 0 (0.0%)    | 0 (0.0%)   | 0.175            |
| Persisting obstruction requiring redo anastomosis                                                        | 1 (0.1%)    | 1 (0.7%)    | 0 (0.0%)    | 0 (0.0%)   | 0.175            |
| Parastomal hernia                                                                                        | 0 (0.0%)    | 0 (0.0%)    | 0 (0.0%)    | 0 (0.0%)   | -                |
| Other                                                                                                    | 17 (2.5%)   | 2 (1.3%)    | 15 (2.9%)   | 0 (0.0%)   | 0.405            |
| Was the patient followed up at 30-days post primary surgery or intervention to assess for complications? |             |             |             |            |                  |
| Yes: reviewed in person                                                                                  | 308 (55.5%) | 81 (55.1%)  | 225 (56.3%) | 2 (25.0%)  | <b>&lt;0.001</b> |
| Yes: via telephone consultation                                                                          | 49 (8.8%)   | 3 (2.0%)    | 45 (11.3%)  | 1 (12.5%)  | -                |
| Yes: via other means                                                                                     | 13 (2.3%)   | 3 (2.0%)    | 10 (2.5%)   | 0 (0.0%)   | -                |
| Yes: still an in-patient at 30-days                                                                      | 107 (19.3%) | 42 (28.6%)  | 65 (16.3%)  | 0 (0.0%)   | -                |
| No: data is based on in-patient observations only                                                        | 44 (7.9%)   | 12 (8.2%)   | 30 (7.5%)   | 2 (25.0%)  | -                |
| No: follow-up was done, but prior to 30-days                                                             | 34 (6.1%)   | 6 (4.1%)    | 25 (6.3%)   | 3 (37.5%)  | -                |
| If the patient had a complication, when was it diagnosed?                                                |             |             |             |            |                  |
| During the primary admission                                                                             | 200 (29.4%) | 31 (20.4%)  | 159 (31.2%) | 10 (50.0%) | <b>0.010</b>     |
| As an emergency re-attender                                                                              | 12 (1.8%)   | 1 (0.7%)    | 11 (2.2%)   | 0 (0.0%)   | -                |
| At routine follow-up as an out-patient                                                                   | 12 (1.8%)   | 1 (0.7%)    | 10 (2.0%)   | 1 (5.0%)   | -                |
| Not applicable, no complications                                                                         | 453 (66.5%) | 119 (78.3%) | 325 (63.9%) | 9 (45.0%)  | -                |
| Missing                                                                                                  | 4 (0.6%)    | 0 (0.0%)    | 4 (0.8%)    | 0 (0.0%)   | -                |

\*Patients born in hospital = 0. Percentages have been rounded to 1 decimal place and may not total 100.0%. HIC: High-income countries. IQR: Interquartile range. LIC: Low-income countries. MIC: Middle-income countries. NEC: Necrotising enterocolitis.

**Supplementary Table 4: Characteristics, perioperative care, surgical interventions, and outcomes for patients with gastroschisis**

| Variable                                                                                | Total (n=453) | HIC (n=139)  | MIC (n=304)  | LIC (n=10)  | P value |
|-----------------------------------------------------------------------------------------|---------------|--------------|--------------|-------------|---------|
| <b>Patient Characteristics:</b>                                                         |               |              |              |             |         |
| Median gestational age at birth (IQR), weeks                                            | 36 (2)        | 36 (2)       | 37 (3)       | 36 (4)      | 0.099   |
| Median age at presentation (IQR), hours                                                 | 0 (10)        | 0 (0)        | 2 (20)       | 12 (12)     | <0.001  |
| Sex:                                                                                    |               |              |              |             |         |
| Male                                                                                    | 232 (51.2%)   | 73 (52.4%)   | 152 (50.0%)  | 7 (70.0%)   | 0.430   |
| Female                                                                                  | 221 (48.8%)   | 66 (47.5%)   | 152 (50.0%)  | 3 (30.0%)   |         |
| Median weight at presentation (IQR), kg                                                 | 2.3 (0.7)     | 2.5 (0.7)    | 2.2 (0.6)    | 2.2 (1.2)   | <0.001  |
| Does the patient have another anomaly in addition to the study condition?               |               |              |              |             |         |
| Yes: Cardiovascular                                                                     | 44 (9.7%)     | 16 (11.5%)   | 28 (9.2%)    | 0 (0.0%)    | 0.433   |
| Yes: Respiratory                                                                        | 12 (2.6%)     | 2 (1.4%)     | 10 (3.3%)    | 0 (0.0%)    | 0.462   |
| Yes: Gastrointestinal                                                                   | 46 (10.2%)    | 4 (2.9%)     | 42 (13.8%)   | 0 (0.0%)    | 0.001   |
| Yes: Neurological                                                                       | 3 (0.7%)      | 1 (0.7%)     | 2 (0.7%)     | 0 (0.0%)    | 0.964   |
| Yes: Genito-urinary                                                                     | 13 (2.9%)     | 2 (1.4%)     | 11 (3.6%)    | 0 (0.0%)    | 0.381   |
| Yes: Musculoskeletal                                                                    | 3 (0.7%)      | 1 (0.7%)     | 2 (0.7%)     | 0 (0.0%)    | 0.964   |
| Yes: Down syndrome                                                                      | 0 (0.0%)      | 0 (0.0%)     | 0 (0.0%)     | 0 (0.0%)    | -       |
| Yes: Beckwith Wiedemann syndrome                                                        | 0 (0.0%)      | 0 (0.0%)     | 0 (0.0%)     | 0 (0.0%)    | -       |
| Yes: Cystic fibrosis                                                                    | 3 (0.7%)      | 1 (0.7%)     | 2 (0.7%)     | 0 (0.0%)    | 0.964   |
| Yes: Chromosomal                                                                        | 1 (0.2%)      | 1 (0.7%)     | 0 (0.0%)     | 0 (0.0%)    | 0.322   |
| Yes: Other                                                                              | 14 (3.1%)     | 4 (2.9%)     | 10 (3.3%)    | 0 (0.0%)    | 0.827   |
| No                                                                                      | 340 (75.1%)   | 112 (80.6%)  | 218 (71.7%)  | 10 (100.0%) | 0.025   |
| Median distance from patient's home to hospital (IQR), km*                              | 2 (58)        | 0 (13)       | 10 (91)      | 52 (94)     | <0.001  |
| Type of delivery:                                                                       |               |              |              |             |         |
| Vaginal (spontaneous)                                                                   | 176 (38.9%)   | 45 (32.4%)   | 122 (40.1%)  | 9 (90.0%)   | <0.001  |
| Vaginal (induced)                                                                       | 26 (5.7%)     | 22 (15.8%)   | 4 (1.3%)     | 0 (0.0%)    | -       |
| Caesarean section (elective)                                                            | 123 (27.2%)   | 36 (25.9%)   | 87 (28.6%)   | 0 (0.0%)    | -       |
| Caesarean section (urgent/non-elective)                                                 | 128 (28.3%)   | 36 (25.9%)   | 91 (29.9%)   | 1 (10.0%)   | -       |
| Was the patient septic on arrival to your hospital?                                     |               |              |              |             |         |
| Yes                                                                                     | 62 (13.7%)    | 5 (3.6%)     | 57 (18.8%)   | 0 (0.0%)    | <0.001  |
| No                                                                                      | 390 (86.1%)   | 134 (96.4%)  | 246 (80.9%)  | 10 (100.0%) | -       |
| Missing                                                                                 | 1 (0.2%)      | 0 (0.0%)     | 1 (0.3%)     | 0 (0.0%)    | -       |
| Was the patient hypovolaemic on arrival to your hospital?                               |               |              |              |             |         |
| Yes                                                                                     | 99 (21.9%)    | 14 (10.1%)   | 84 (27.6%)   | 1 (10.0%)   | <0.001  |
| No                                                                                      | 353 (77.9%)   | 125 (89.9%)  | 219 (72.0%)  | 9 (90.0%)   | -       |
| Missing                                                                                 | 1 (0.2%)      | 0 (0.0%)     | 1 (0.3%)     | 0 (0.0%)    | -       |
| Was the patient hypothermic on arrival to your hospital?                                |               |              |              |             |         |
| Yes                                                                                     | 90 (19.9%)    | 7 (5.0%)     | 81 (26.6%)   | 2 (20.0%)   | <0.001  |
| No                                                                                      | 362 (79.9%)   | 132 (95.0%)  | 222 (73.0%)  | 8 (80.0%)   | -       |
| Missing                                                                                 | 1 (0.2%)      | 0 (0.0%)     | 1 (0.3%)     | 0 (0.0%)    | -       |
| American Society of Anaesthesiologists (ASA) Score at the time of primary intervention: |               |              |              |             |         |
| 1. Healthy person                                                                       | 61 (13.5%)    | 21 (15.1%)   | 37 (12.2%)   | 3 (30.0%)   | <0.001  |
| 2. Mild systemic disease                                                                | 127 (28.0%)   | 35 (25.2%)   | 91 (29.9%)   | 1 (10.0%)   | -       |
| 3. Severe systemic disease                                                              | 172 (38.0%)   | 65 (46.8%)   | 106 (34.9%)  | 1 (10.0%)   | -       |
| 4. Severe systemic disease that is a constant threat to life                            | 50 (11.0%)    | 12 (8.6%)    | 38 (12.5%)   | 0 (0.0%)    | -       |
| 5. A moribund patient who is not expected to survive without the operation              | 13 (2.9%)     | 1 (0.7%)     | 12 (3.9%)    | 0 (0.0%)    | -       |
| Not applicable - no intervention                                                        | 30 (6.6%)     | 5 (3.6%)     | 20 (6.6%)    | 5 (50.0%)   | -       |
| What study condition does the patient have?                                             |               |              |              |             |         |
| Oesophageal atresia                                                                     | 0 (0.0%)      | 0 (0.0%)     | 0 (0.0%)     | 0 (0.0%)    | -       |
| Congenital diaphragmatic hernia                                                         | 0 (0.0%)      | 0 (0.0%)     | 0 (0.0%)     | 0 (0.0%)    | -       |
| Intestinal atresia                                                                      | 17 (3.8%)     | 8 (5.8%)     | 9 (3.0%)     | 0 (0.0%)    | 0.292   |
| Gastroschisis                                                                           | 453 (100.0%)  | 139 (100.0%) | 304 (100.0%) | 10 (100.0%) | -       |
| Exomphalos/Omphalocele                                                                  | 0 (0.0%)      | 0 (0.0%)     | 0 (0.0%)     | 0 (0.0%)    | -       |
| Anorectal malformation                                                                  | 0 (0.0%)      | 0 (0.0%)     | 0 (0.0%)     | 0 (0.0%)    | -       |
| Hirschsprung's Disease                                                                  | 1 (0.2%)      | 0 (0.0%)     | 1 (0.3%)     | 0 (0.0%)    | 0.782   |
| Type of Gastroschisis?                                                                  |               |              |              |             |         |
| Simple                                                                                  | 351 (77.5%)   | 106 (76.3%)  | 239 (78.6%)  | 6 (60.0%)   | 0.351   |
| Complex: associated with atresia                                                        | 44 (9.7%)     | 13 (9.4%)    | 30 (9.9%)    | 1 (10.0%)   | 0.985   |
| Complex: associated with necrosis                                                       | 26 (5.7%)     | 10 (7.2%)    | 15 (4.9%)    | 1 (10.0%)   | 0.537   |
| Complex: associated with perforation                                                    | 19 (4.2%)     | 7 (5.0%)     | 11 (3.6%)    | 1 (10.0%)   | 0.513   |
| Complex: associated with closing gastroschisis                                          | 29 (6.4%)     | 9 (6.5%)     | 19 (6.3%)    | 1 (10.0%)   | 0.892   |
| <b>Care prior to presentation at the paediatric surgery centre:</b>                     |               |              |              |             |         |
| Antenatal ultrasound undertaken?                                                        |               |              |              |             |         |
| Yes: study condition diagnosed                                                          | 281 (62.0%)   | 132 (95.0%)  | 148 (48.7%)  | 1 (10.0%)   | <0.001  |
| Yes: problem identified but study condition not diagnosed                               | 17 (3.8%)     | 2 (1.4%)     | 15 (4.9%)    | 0 (0.0%)    | -       |
| Yes: no problem identified                                                              | 90 (19.9%)    | 1 (0.7%)     | 85 (28.0%)   | 4 (40.0%)   | -       |
| No                                                                                      | 65 (14.3%)    | 4 (2.9%)     | 56 (18.4%)   | 5 (50.0%)   | -       |

|                                                                                                                 |             |             |             |            |        |
|-----------------------------------------------------------------------------------------------------------------|-------------|-------------|-------------|------------|--------|
| Median gestational age of study condition diagnosis if diagnosis was antenatal (IQR), weeks                     | 22 (16)     | 19 (12)     | 26 (13)     | -          | <0-001 |
| <b>Mode of transport to hospital:</b>                                                                           |             |             |             |            |        |
| Ambulance                                                                                                       | 137 (30-2%) | 23 (16-5%)  | 107 (35-2%) | 7 (70-0%)  | <0-001 |
| Other transport provided by the health service                                                                  | 14 (3-1%)   | 4 (2-9%)    | 10 (3-3%)   | 0 (0-0%)   | -      |
| Patient's own transport                                                                                         | 58 (12-8%)  | 0 (0-0%)    | 56 (18-4%)  | 2 (20-0%)  | -      |
| Born within the hospital                                                                                        | 244 (53-9%) | 112 (80-6%) | 131 (43-1%) | 1 (10-0%)  | -      |
| <b>If out born, where did the patient present from?</b>                                                         |             |             |             |            |        |
| Home                                                                                                            | 20 (9-6%)   | 0 (0-0%)    | 20 (11-6%)  | 0 (0-0%)   | 0-017  |
| Community Clinic/General Practice                                                                               | 42 (20-1%)  | 1 (3-7%)    | 38 (22-0%)  | 3 (33-3%)  | -      |
| District Hospital                                                                                               | 143 (68-4%) | 25 (92-6%)  | 112 (64-7%) | 6 (66-7%)  | -      |
| From a different speciality within the study centre                                                             | 1 (0-5%)    | 1 (3-7%)    | 0 (0-0%)    | 0 (0-0%)   | -      |
| Unknown                                                                                                         | 2 (1-0%)    | 0 (0-0%)    | 2 (1-2%)    | 0 (0-0%)   | -      |
| Missing                                                                                                         | 1 (0-5%)    | 0 (0-0%)    | 1 (0-6%)    | 0 (0-0%)   | -      |
| <b>Perioperative care at the paediatric surgery centre:</b>                                                     |             |             |             |            |        |
| <b>If septic, were appropriate antibiotics administered?</b>                                                    |             |             |             |            |        |
| Yes within 1 hour of arrival                                                                                    | 48 (77-4%)  | 4 (80-0%)   | 44 (77-2%)  | 0 (0-0%)   | 0-910  |
| Yes: within the first day of arrival                                                                            | 12 (19-4%)  | 1 (20-0%)   | 11 (19-3%)  | 0 (0-0%)   | -      |
| No                                                                                                              | 2 (3-2%)    | 0 (0-0%)    | 2 (3-5%)    | 0 (0-0%)   | -      |
| <b>If hypovolaemic, was an intravenous fluid bolus given?</b>                                                   |             |             |             |            |        |
| Yes within 1 hour of arrival                                                                                    | 88 (88-9%)  | 11 (78-6%)  | 77 (91-7%)  | 0 (0-0%)   | 0-006  |
| Yes: within the first day of arrival                                                                            | 11 (11-1%)  | 3 (21-4%)   | 7 (8-3%)    | 1 (100-0%) | -      |
| No                                                                                                              | 0 (0-0%)    | 0 (0-0%)    | 0 (0-0%)    | 0 (0-0%)   | -      |
| <b>If hypovolaemic, how much intravenous fluid was given?</b>                                                   |             |             |             |            |        |
| 10 - 20mls/kg                                                                                                   | 78 (78-8%)  | 7 (50-0%)   | 70 (83-3%)  | 1 (100-0%) | 0-016  |
| Above 20mls/kg                                                                                                  | 21 (21-2%)  | 7 (50-0%)   | 14 (16-7%)  | 0 (0-0%)   | -      |
| <b>If hypothermic, was the patient warmed on arrival to your hospital to within a normal temperature range?</b> |             |             |             |            |        |
| Yes                                                                                                             | 86 (95-6%)  | 6 (85-7%)   | 78 (96-3%)  | 2 (100-0%) | 0-410  |
| No                                                                                                              | 4 (4-4%)    | 1 (14-3%)   | 3 (3-7%)    | 0 (0-0%)   | -      |
| <b>Did the patient receive central venous access?</b>                                                           |             |             |             |            |        |
| Yes: umbilical catheter                                                                                         | 14 (3-1%)   | 4 (2-9%)    | 10 (3-3%)   | 0 (0-0%)   | 0-827  |
| Yes: peripherally inserted central catheter (PICC)                                                              | 231 (51-0%) | 101 (72-7%) | 129 (42-4%) | 1 (10-0%)  | <0-001 |
| Yes: percutaneously inserted central line with ultrasound guidance                                              | 70 (15-5%)  | 30 (21-6%)  | 40 (13-2%)  | 0 (0-0%)   | 0-029  |
| Yes: surgically placed central line (open insertion)                                                            | 66 (14-6%)  | 11 (7-9%)   | 55 (18-1%)  | 0 (0-0%)   | 0-008  |
| No                                                                                                              | 107 (23-6%) | 4 (2-9%)    | 94 (30-9%)  | 9 (90-0%)  | <0-001 |
| <b>Median total duration of antibiotics following primary intervention (IQR), days</b>                          |             |             |             |            |        |
|                                                                                                                 | 7 (11)      | 6 (6)       | 9 (13)      | 2 (4)      | <0-001 |
| <b>Did the patient receive a blood transfusion?</b>                                                             |             |             |             |            |        |
| Yes: not cross-matched                                                                                          | 3 (0-7%)    | 0 (0-0%)    | 3 (1-0%)    | 0 (0-0%)   | 0-001  |
| Yes: cross-matched.                                                                                             | 187 (41-3%) | 39 (28-1%)  | 146 (48-0%) | 2 (20-0%)  | -      |
| No: not required.                                                                                               | 254 (56-1%) | 98 (70-5%)  | 148 (48-7%) | 8 (80-0%)  | -      |
| No: it was required but not available.                                                                          | 9 (2-0%)    | 2 (1-4%)    | 7 (2-3%)    | 0 (0-0%)   | -      |
| <b>Did the patient require ventilation?</b>                                                                     |             |             |             |            |        |
| Yes: and it was given                                                                                           | 342 (75-5%) | 125 (89-9%) | 216 (71-1%) | 1 (10-0%)  | <0-001 |
| Yes, but it was not available                                                                                   | 29 (6-4%)   | 0 (0-0%)    | 28 (9-2%)   | 1 (10-0%)  | -      |
| No                                                                                                              | 82 (18-1%)  | 14 (10-1%)  | 60 (19-7%)  | 8 (80-0%)  | -      |
| <b>Median time patient remained on ventilation if given (IQR), days</b>                                         |             |             |             |            |        |
|                                                                                                                 | 4 (7)       | 4 (6)       | 5 (7)       | 1 (0)      | 0-013  |
| <b>Median time to first enteral feed (post-primary intervention) (IQR), days</b>                                |             |             |             |            |        |
|                                                                                                                 | 11 (11)     | 10 (8)      | 13 (10)     | 0 (0)      | <0-001 |
| <b>Median time to full enteral feeds (post-primary intervention) (IQR), days</b>                                |             |             |             |            |        |
|                                                                                                                 | 22 (15)     | 27 (13)     | 21 (18)     | 30 (0)     | <0-001 |
| <b>Did the patient require parenteral nutrition?</b>                                                            |             |             |             |            |        |
| Yes: and it was given                                                                                           | 351 (77-5%) | 138 (99-3%) | 212 (69-7%) | 1 (10-0%)  | <0-001 |
| Yes: and it was sometimes available, but less than required                                                     | 21 (4-6%)   | 0 (0-0%)    | 21 (6-9%)   | 0 (0-0%)   | -      |
| Yes: but it was not available                                                                                   | 26 (5-7%)   | 0 (0-0%)    | 23 (7-6%)   | 3 (30-0%)  | -      |
| No                                                                                                              | 55 (12-1%)  | 1 (0-7%)    | 48 (15-8%)  | 6 (60-0%)  | -      |
| <b>Median time patient received parenteral nutrition if received (IQR), days</b>                                |             |             |             |            |        |
|                                                                                                                 | 21 (16)     | 24 (13)     | 20 (18)     | 30 (0)     | <0-001 |
| <b>Surgical intervention:</b>                                                                                   |             |             |             |            |        |
| <b>Primary intervention:</b>                                                                                    |             |             |             |            |        |
| Primary closure in the operating room (OR)                                                                      | 166 (36-6%) | 53 (38-1%)  | 113 (37-2%) | 0 (0-0%)   | <0-001 |
| Staged closure using a preformed silo                                                                           | 108 (23-8%) | 41 (29-5%)  | 64 (21-1%)  | 3 (30-0%)  | -      |
| Staged closure using a surgical silo (including improvised silo)                                                | 83 (18-3%)  | 17 (12-2%)  | 64 (21-1%)  | 2 (20-0%)  | -      |
| Staged closure using an Alexis Wound Retractor and Protector                                                    | 38 (8-4%)   | 6 (4-3%)    | 32 (10-5%)  | 0 (0-0%)   | -      |
| Primary closure at the cotside (Bianchi technique)                                                              | 32 (7-1%)   | 21 (15-1%)  | 11 (3-6%)   | 0 (0-0%)   | -      |
| Stoma                                                                                                           | 3 (0-7%)    | 0 (0-0%)    | 3 (1-0%)    | 0 (0-0%)   | -      |
| No intervention undertaken                                                                                      | 14 (3-1%)   | 0 (0-0%)    | 9 (3-0%)    | 5 (50-0%)  | -      |
| Other method                                                                                                    | 9 (2-0%)    | 1 (0-7%)    | 8 (2-6%)    | 0 (0-0%)   | -      |
| <b>Time from presentation to primary intervention in hours, median (IQR)</b>                                    |             |             |             |            |        |
|                                                                                                                 | 4 (6)       | 2 (3)       | 5 (10)      | 3 (5)      | <0-001 |
| <b>Method of defect closure?</b>                                                                                |             |             |             |            |        |
| Fascia and skin closed with sutures                                                                             | 277 (63-4%) | 89 (64-0%)  | 187 (63-8%) | 1 (20-0%)  | <0-001 |
| Sutureless closure with skin edges opposed and dressing applied                                                 | 45 (10-3%)  | 25 (18-0%)  | 20 (6-8%)   | 0 (0-0%)   | -      |
| Just skin closed with sutures, fascia left open                                                                 | 36 (8-2%)   | 6 (4-3%)    | 30 (10-2%)  | 0 (0-0%)   | -      |

|                                                                                                                  |             |             |             |            |        |
|------------------------------------------------------------------------------------------------------------------|-------------|-------------|-------------|------------|--------|
| Dressing applied, defect left open to close by secondary intention (+/- cord flap/ cord coverage of defect)      | 21 (4.8%)   | 12 (8.6%)   | 9 (3.1%)    | 0 (0.0%)   | -      |
| Umbilical cord sutured over the defect, fascia left open                                                         | 14 (3.2%)   | 3 (2.2%)    | 11 (3.8%)   | 0 (0.0%)   | -      |
| Patch/mesh closure                                                                                               | 3 (0.7%)    | 0 (0.0%)    | 3 (1.0%)    | 0 (0.0%)   | -      |
| Other                                                                                                            | 36 (8.2%)   | 2 (1.4%)    | 30 (10.2%)  | 4 (80.0%)  | -      |
| Patient died before the defect was closed                                                                        | 5 (1.1%)    | 2 (1.4%)    | 3 (1.0%)    | 0 (0.0%)   | -      |
| Time from admission to abdominal wall closure in days, median (IQR)                                              | 2 (5)       | 1 (6)       | 2 (5)       | 2 (0)      | 0.873  |
| What type of anaesthesia was used for the primary intervention?                                                  |             |             |             |            |        |
| General anaesthesia with endotracheal tube                                                                       | 361 (79.7%) | 121 (87.1%) | 236 (77.6%) | 4 (40.0%)  | <0.001 |
| General anaesthesia with laryngeal airway                                                                        | 1 (0.2%)    | 0 (0.0%)    | 1 (0.3%)    | 0 (0.0%)   | -      |
| Ketamine anaesthesia                                                                                             | 1 (0.2%)    | 0 (0.0%)    | 1 (0.3%)    | 0 (0.0%)   | -      |
| Spinal/caudal anaesthesia                                                                                        | 1 (0.2%)    | 0 (0.0%)    | 1 (0.3%)    | 0 (0.0%)   | -      |
| Local anaesthesia only                                                                                           | 9 (2.0%)    | 0 (0.0%)    | 9 (3.0%)    | 0 (0.0%)   | -      |
| No anaesthesia, just analgesia                                                                                   | 44 (9.7%)   | 15 (10.8%)  | 29 (9.5%)   | 0 (0.0%)   | -      |
| No anaesthesia, no analgesia                                                                                     | 17 (3.8%)   | 3 (2.2%)    | 14 (4.6%)   | 0 (0.0%)   | -      |
| Not applicable: no surgery or primary intervention undertaken.                                                   | 19 (4.2%)   | 0 (0.0%)    | 13 (4.3%)   | 6 (60.0%)  | -      |
| Who undertook the anaesthetic for the primary intervention?                                                      |             |             |             |            |        |
| Anaesthetic doctor                                                                                               | 337 (74.4%) | 94 (67.6%)  | 241 (79.3%) | 2 (20.0%)  | <0.001 |
| Anaesthetic nurse                                                                                                | 4 (0.9%)    | 0 (0.0%)    | 2 (0.7%)    | 2 (20.0%)  | -      |
| Medical officer                                                                                                  | 21 (4.6%)   | 20 (14.4%)  | 1 (0.3%)    | 0 (0.0%)   | -      |
| Surgeon                                                                                                          | 9 (2.0%)    | 0 (0.0%)    | 9 (3.0%)    | 0 (0.0%)   | -      |
| Other healthcare professional                                                                                    | 20 (4.4%)   | 11 (7.9%)   | 9 (3.0%)    | 0 (0.0%)   | -      |
| No anaesthetic undertaken                                                                                        | 62 (13.7%)  | 14 (10.1%)  | 42 (13.8%)  | 6 (60.0%)  | -      |
| Who undertook the primary intervention?                                                                          |             |             |             |            |        |
| Paediatric surgeon (or junior with paediatric surgeon assisting/in the room)                                     | 423 (93.4%) | 133 (95.7%) | 285 (93.8%) | 5 (50.0%)  | <0.001 |
| General surgeon (or junior with general surgeon assisting/in the room)                                           | 1 (0.2%)    | 0 (0.0%)    | 1 (0.3%)    | 0 (0.0%)   | -      |
| Junior doctor, medical officer or other (without a paediatric or general surgeon assisting/in the room)          | 5 (1.1%)    | 2 (1.4%)    | 3 (1.0%)    | 0 (0.0%)   | -      |
| Trainee surgeon (without a paediatric or general surgeon assisting or in the room)                               | 11 (2.4%)   | 4 (2.9%)    | 7 (2.3%)    | 0 (0.0%)   | -      |
| Not applicable - no surgery or primary intervention undertaken.                                                  | 13 (2.9%)   | 0 (0.0%)    | 8 (2.6%)    | 5 (50.0%)  | -      |
| Was a Surgical Safety Checklist used at the time of primary intervention?                                        |             |             |             |            |        |
| Yes                                                                                                              | 304 (67.1%) | 111 (79.9%) | 191 (62.8%) | 2 (20.0%)  | <0.001 |
| No: but it was available                                                                                         | 63 (13.9%)  | 12 (8.6%)   | 50 (16.4%)  | 1 (10.0%)  | -      |
| No: it was not available                                                                                         | 29 (6.4%)   | 0 (0.0%)    | 28 (9.2%)   | 1 (10.0%)  | -      |
| Not applicable: a conservative primary intervention was undertaken                                               | 37 (8.2%)   | 16 (11.5%)  | 21 (6.9%)   | 0 (0.0%)   | -      |
| Not applicable: no surgery or primary intervention undertaken                                                    | 20 (4.4%)   | 0 (0.0%)    | 14 (4.6%)   | 6 (60.0%)  | -      |
| <b>Outcomes:</b>                                                                                                 |             |             |             |            |        |
| Did the patient survive to discharge (or 30-days if still an in-patient 30-days following primary intervention)? |             |             |             |            |        |
| Yes                                                                                                              | 345 (76.2%) | 137 (98.6%) | 207 (68.1%) | 1 (10.0%)  | <0.001 |
| No                                                                                                               | 108 (23.8%) | 2 (1.4%)    | 97 (31.9%)  | 9 (90.0%)  | -      |
| If the patient was discharged prior, were they still alive at 30-days following primary intervention?            |             |             |             |            |        |
| Yes                                                                                                              | 306 (89.2%) | 122 (90.4%) | 184 (88.9%) | 0 (0.0%)   | <0.001 |
| No                                                                                                               | 1 (0.3%)    | 0 (0.0%)    | 1 (0.5%)    | 0 (0.0%)   | -      |
| Not followed-up after discharge                                                                                  | 9 (2.6%)    | 3 (2.2%)    | 5 (2.4%)    | 1 (100.0%) | -      |
| Followed-up, but not until 30-days post primary intervention                                                     | 27 (7.9%)   | 10 (7.4%)   | 17 (8.2%)   | 0 (0.0%)   | -      |
| Cause of mortality:                                                                                              |             |             |             |            |        |
| Sepsis                                                                                                           | 50 (45.9%)  | 2 (100.0%)  | 43 (43.9%)  | 5 (55.6%)  | 0.650  |
| Respiratory failure                                                                                              | 25 (22.9%)  | 0 (0.0%)    | 24 (24.5%)  | 1 (11.1%)  | -      |
| Cardiac failure                                                                                                  | 15 (13.8%)  | 0 (0.0%)    | 15 (15.3%)  | 0 (0.0%)   | -      |
| Electrolyte disturbance                                                                                          | 5 (4.6%)    | 0 (0.0%)    | 5 (5.1%)    | 0 (0.0%)   | -      |
| Ischaemic bowel                                                                                                  | 2 (1.8%)    | 0 (0.0%)    | 2 (2.0%)    | 0 (0.0%)   | -      |
| Malnutrition                                                                                                     | 2 (1.8%)    | 0 (0.0%)    | 1 (1.0%)    | 1 (11.1%)  | -      |
| Aspiration pneumonia                                                                                             | 2 (1.8%)    | 0 (0.0%)    | 2 (2.0%)    | 0 (0.0%)   | -      |
| Haemorrhage                                                                                                      | 1 (0.9%)    | 0 (0.0%)    | 1 (1.0%)    | 0 (0.0%)   | -      |
| Anastomotic leak                                                                                                 | 1 (0.9%)    | 0 (0.0%)    | 1 (1.0%)    | 0 (0.0%)   | -      |
| Other                                                                                                            | 6 (5.5%)    | 0 (0.0%)    | 4 (4.1%)    | 2 (22.2%)  | -      |
| Median duration of hospital stays, (IQR) days                                                                    | 22 (18)     | 29 (8)      | 20 (24)     | 6 (6)      | <0.001 |
| Did the patient have a surgical site infection?                                                                  |             |             |             |            |        |
| Yes                                                                                                              | 51 (11.3%)  | 19 (13.7%)  | 30 (9.9%)   | 2 (20.0%)  | <0.001 |
| No                                                                                                               | 368 (81.2%) | 115 (82.7%) | 250 (82.2%) | 3 (30.0%)  | -      |
| Not applicable, no surgical wound                                                                                | 34 (7.5%)   | 5 (3.6%)    | 24 (7.9%)   | 5 (50.0%)  | -      |
| Did the patient have a full thickness wound dehiscence?                                                          |             |             |             |            |        |
| Yes                                                                                                              | 21 (4.6%)   | 3 (2.2%)    | 18 (5.9%)   | 0 (0.0%)   | <0.001 |
| No                                                                                                               | 399 (88.1%) | 130 (93.5%) | 265 (87.2%) | 4 (40.0%)  | -      |
| Not applicable, no surgical wound                                                                                | 33 (7.3%)   | 6 (4.3%)    | 21 (6.9%)   | 6 (60.0%)  | -      |
| Did the patient require a further unplanned intervention?                                                        |             |             |             |            |        |
| Yes – percutaneous                                                                                               | 5 (1.1%)    | 3 (2.2%)    | 2 (0.7%)    | 0 (0.0%)   | <0.001 |
| Yes – surgical intervention                                                                                      | 58 (12.8%)  | 19 (13.7%)  | 38 (12.5%)  | 1 (10.0%)  | -      |
| No                                                                                                               | 371 (81.9%) | 117 (84.2%) | 251 (82.6%) | 3 (30.0%)  | -      |
| Not applicable – no primary intervention undertaken                                                              | 19 (4.2%)   | 0 (0.0%)    | 13 (4.3%)   | 6 (60.0%)  | -      |



|                                                                                                          |             |             |             |            |              |
|----------------------------------------------------------------------------------------------------------|-------------|-------------|-------------|------------|--------------|
| If central line access used, did the patient acquire central line sepsis?                                |             |             |             |            |              |
| Yes, diagnosed clinically                                                                                | 14 (4.1%)   | 6 (4.4%)    | 8 (3.8%)    | 0 (0.0%)   | 0.390        |
| Yes, confirmed on microbiology                                                                           | 49 (14.2%)  | 13 (9.6%)   | 36 (17.2%)  | 0 (0.0%)   | -            |
| No                                                                                                       | 282 (81.7%) | 116 (85.9%) | 165 (78.9%) | 1 (100.0%) | -            |
| Did the neonate have any of these complications within 30-days of primary intervention?                  |             |             |             |            |              |
| Abdominal compartment syndrome (ACS)                                                                     | 36 (8.2%)   | 7 (5.0%)    | 29 (9.8%)   | 0 (0.0%)   | 0.171        |
| Ischemic bowel                                                                                           | 26 (5.9%)   | 8 (5.8%)    | 17 (5.8%)   | 1 (20.0%)  | 0.840        |
| Necrotising enterocolitis                                                                                | 18 (4.1%)   | 10 (7.2%)   | 8 (2.7%)    | 0 (0.0%)   | 0.060        |
| None of these                                                                                            | 371 (84.5%) | 121 (87.1%) | 246 (83.4%) | 4 (80.0%)  | <b>0.001</b> |
| If the patient has ACS, was the abdomen re-opened?                                                       |             |             |             |            |              |
| Yes                                                                                                      | 11 (30.6%)  | 5 (71.4%)   | 6 (20.7%)   | -          | <b>0.009</b> |
| No                                                                                                       | 25 (69.4%)  | 2 (28.6%)   | 23 (79.3%)  | -          | -            |
| Was the patient followed up at 30-days post primary surgery or intervention to assess for complications? |             |             |             |            |              |
| Yes: reviewed in person                                                                                  | 179 (51.9%) | 56 (40.9%)  | 123 (59.4%) | 0 (0.0%)   | <b>0.005</b> |
| Yes: via telephone consultation                                                                          | 14 (4.1%)   | 7 (5.1%)    | 7 (3.4%)    | 0 (0.0%)   | -            |
| Yes: via other means                                                                                     | 10 (2.9%)   | 4 (2.9%)    | 6 (2.9%)    | 0 (0.0%)   | -            |
| Yes: still an in-patient at 30-days                                                                      | 104 (30.1%) | 55 (40.1%)  | 49 (23.7%)  | 0 (0.0%)   | -            |
| No: data is based on in-patient observations only                                                        | 20 (5.8%)   | 9 (6.6%)    | 10 (4.8%)   | 1 (100.0%) | -            |
| No: follow-up was done, but prior to 30-days                                                             | 18 (5.2%)   | 6 (4.4%)    | 12 (5.8%)   | 0 (0.0%)   | -            |
| If the patient had a complication, when was it diagnosed?                                                |             |             |             |            |              |
| During the primary admission                                                                             | 164 (36.2%) | 41 (29.5%)  | 120 (39.5%) | 3 (30.0%)  | <b>0.007</b> |
| As an emergency re-attender                                                                              | 13 (2.9%)   | 2 (1.4%)    | 9 (3.0%)    | 2 (20.0%)  | -            |
| At routine follow-up as an out-patient                                                                   | 2 (0.4%)    | 0 (0.0%)    | 2 (0.7%)    | 0 (0.0%)   | -            |
| Not applicable, no complications                                                                         | 273 (60.3%) | 96 (69.1%)  | 172 (56.6%) | 5 (50.0%)  | -            |
| Missing                                                                                                  | 1 (0.2%)    | 0 (0.0%)    | 1 (0.3%)    | 0 (0.0%)   | -            |

\*Patients born in hospital = 0. Percentages have been rounded to 1 decimal place and may not total 100.0%. HIC: High-income countries. IQR: Interquartile range. LIC: Low-income countries. MIC: Middle-income countries.

**Supplementary Table 5: Characteristics, perioperative care, surgical interventions, and outcomes for patients with exomphalos/omphalocele**

| Variable                                                                                | Total (n=325) | HIC (n=70)  | MIC (n=241)  | LIC (n=14)  | P value          |
|-----------------------------------------------------------------------------------------|---------------|-------------|--------------|-------------|------------------|
| <b>Patient Characteristics:</b>                                                         |               |             |              |             |                  |
| Median gestational age at birth (IQR), weeks                                            | 38 (3)        | 38 (4)      | 38 (3)       | 37 (2)      | 0.472            |
| Median age at presentation (IQR), hours                                                 | 3 (23)        | 0 (2)       | 6 (24)       | 13 (40)     | <b>&lt;0.001</b> |
| Sex:                                                                                    |               |             |              |             |                  |
| Male                                                                                    | 183 (56.3%)   | 43 (61.4%)  | 131 (54.4%)  | 9 (64.3%)   | 0.780            |
| Female                                                                                  | 141 (43.4%)   | 27 (38.6%)  | 109 (45.2%)  | 5 (35.7%)   | -                |
| Ambiguous                                                                               | 1 (0.3%)      | 0 (0.0%)    | 1 (0.4%)     | 0 (0.0%)    | -                |
| Median weight at presentation (IQR), kg                                                 | 2.8 (0.9)     | 2.8 (0.9)   | 2.7 (0.9)    | 2.7 (0.7)   | 0.589            |
| Does the patient have another anomaly in addition to the study condition?               |               |             |              |             |                  |
| Yes: Cardiovascular                                                                     | 114 (35.1%)   | 29 (41.4%)  | 85 (35.3%)   | 0 (0.0%)    | <b>0.012</b>     |
| Yes: Respiratory                                                                        | 16 (4.9%)     | 8 (11.4%)   | 8 (3.3%)     | 0 (0.0%)    | <b>0.015</b>     |
| Yes: Gastrointestinal                                                                   | 49 (15.1%)    | 11 (15.7%)  | 37 (15.4%)   | 1 (7.1%)    | 0.696            |
| Yes: Neurological                                                                       | 21 (6.5%)     | 8 (11.4%)   | 11 (4.6%)    | 2 (14.3%)   | 0.058            |
| Yes: Genito-urinary                                                                     | 52 (16.0%)    | 12 (17.1%)  | 38 (15.8%)   | 2 (14.3%)   | 0.947            |
| Yes: Musculoskeletal                                                                    | 27 (8.3%)     | 8 (11.4%)   | 17 (7.1%)    | 2 (14.3%)   | 0.359            |
| Yes: Down syndrome                                                                      | 4 (1.2%)      | 1 (1.4%)    | 1 (0.4%)     | 2 (14.3%)   | <b>&lt;0.001</b> |
| Yes: Beckwith Wiedemann syndrome                                                        | 6 (1.8%)      | 3 (4.3%)    | 3 (1.2%)     | 0 (0.0%)    | 0.218            |
| Yes: Cystic fibrosis                                                                    | 0 (0.0%)      | 0 (0.0%)    | 0 (0.0%)     | 0 (0.0%)    | -                |
| Yes: Chromosomal                                                                        | 11 (3.4%)     | 5 (7.1%)    | 5 (2.1%)     | 1 (7.1%)    | 0.087            |
| Yes: Other                                                                              | 24 (7.4%)     | 7 (10.0%)   | 17 (7.1%)    | 0 (0.0%)    | 0.396            |
| No                                                                                      | 137 (42.2%)   | 27 (38.6%)  | 103 (42.7%)  | 7 (50.0%)   | 0.685            |
| Median distance from patient's home to hospital (IQR), km*                              | 13 (68)       | 0 (17)      | 16 (77)      | 56 (111)    | <b>&lt;0.001</b> |
| Type of delivery:                                                                       |               |             |              |             |                  |
| Vaginal (spontaneous)                                                                   | 116 (35.7%)   | 16 (22.9%)  | 89 (36.9%)   | 11 (78.6%)  | <b>0.015</b>     |
| Vaginal (induced)                                                                       | 12 (3.7%)     | 4 (5.7%)    | 7 (2.9%)     | 1 (7.1%)    | -                |
| Caesarean section (elective)                                                            | 130 (40.0%)   | 33 (47.1%)  | 96 (39.8%)   | 1 (7.1%)    | -                |
| Caesarean section (urgent/non-elective)                                                 | 66 (20.3%)    | 17 (24.3%)  | 48 (19.9%)   | 1 (7.1%)    | -                |
| Unknown                                                                                 | 1 (0.3%)      | 0 (0.0%)    | 1 (0.4%)     | 0 (0.0%)    | -                |
| Was the patient septic on arrival to your hospital?                                     |               |             |              |             |                  |
| Yes                                                                                     | 40 (12.3%)    | 1 (1.4%)    | 35 (14.5%)   | 4 (28.6%)   | <b>0.002</b>     |
| No                                                                                      | 285 (87.7%)   | 69 (98.6%)  | 206 (85.5%)  | 10 (71.4%)  | -                |
| Was the patient hypovolaemic on arrival to your hospital?                               |               |             |              |             |                  |
| Yes                                                                                     | 29 (8.9%)     | 5 (7.1%)    | 22 (9.1%)    | 2 (14.3%)   | <b>0.002</b>     |
| No                                                                                      | 296 (91.1%)   | 65 (92.9%)  | 219 (90.9%)  | 12 (85.7%)  | -                |
| Was the patient hypothermic on arrival to your hospital?                                |               |             |              |             |                  |
| Yes                                                                                     | 32 (9.8%)     | 4 (5.7%)    | 25 (10.4%)   | 3 (21.4%)   | <b>0.002</b>     |
| No                                                                                      | 293 (90.2%)   | 66 (94.3%)  | 216 (89.6%)  | 11 (78.6%)  | -                |
| American Society of Anaesthesiologists (ASA) Score at the time of primary intervention: |               |             |              |             |                  |
| 1. Healthy person                                                                       | 48 (14.8%)    | 6 (8.6%)    | 39 (16.2%)   | 3 (21.4%)   | <b>&lt;0.001</b> |
| 2. Mild systemic disease                                                                | 125 (38.5%)   | 19 (27.1%)  | 104 (43.2%)  | 2 (14.3%)   | -                |
| 3. Severe systemic disease                                                              | 72 (22.2%)    | 24 (34.3%)  | 48 (19.9%)   | 0 (0.0%)    | -                |
| 4. Severe systemic disease that is a constant threat to life                            | 15 (4.6%)     | 5 (7.1%)    | 10 (4.1%)    | 0 (0.0%)    | -                |
| 5. A moribund patient who is not expected to survive without the operation              | 8 (2.5%)      | 1 (1.4%)    | 7 (2.9%)     | 0 (0.0%)    | -                |
| Not applicable - no intervention                                                        | 55 (16.9%)    | 14 (20.0%)  | 32 (13.3%)   | 9 (64.3%)   | -                |
| Missing                                                                                 | 2 (0.6%)      | 1 (1.4%)    | 1 (0.4%)     | 0 (0.0%)    | -                |
| What study condition does the patient have?                                             |               |             |              |             |                  |
| Oesophageal atresia                                                                     | 3 (0.9%)      | 1 (1.4%)    | 2 (0.8%)     | 0 (0.0%)    | 0.840            |
| Congenital diaphragmatic hernia                                                         | 1 (0.3%)      | 1 (1.4%)    | 0 (0.0%)     | 0 (0.0%)    | 0.161            |
| Intestinal atresia                                                                      | 8 (2.3%)      | 3 (4.3%)    | 5 (2.1%)     | 0 (0.0%)    | -                |
| Gastroschisis                                                                           | 0 (0.0%)      | 0 (0.0%)    | 0 (0.0%)     | 0 (0.0%)    | -                |
| Exomphalos/Omphalocele                                                                  | 325 (100.0%)  | 70 (100.0%) | 241 (100.0%) | 14 (100.0%) | -                |
| Anorectal malformation                                                                  | 15 (4.6%)     | 3 (4.3%)    | 12 (5.0%)    | 0 (0.0%)    | 0.681            |
| Hirschsprung's Disease                                                                  | 0 (0.0%)      | 0 (0.0%)    | 0 (0.0%)     | 0 (0.0%)    | -                |
| Type of Exomphalos?                                                                     |               |             |              |             |                  |
| Major                                                                                   | 148 (45.5%)   | 28 (40.0%)  | 116 (48.1%)  | 4 (28.6%)   | 0.190            |
| Minor                                                                                   | 175 (53.8%)   | 42 (60.0%)  | 123 (51.0%)  | 10 (71.4%)  | -                |
| Missing                                                                                 | 2 (0.6%)      | 0 (0.0%)    | 2 (0.8%)     | 0 (0.0%)    | -                |
| Hypoglycaemic on arrival?                                                               |               |             |              |             |                  |
| Yes                                                                                     | 39 (12.0%)    | 15 (21.4%)  | 24 (10.0%)   | 0 (0.0%)    | <b>&lt;0.001</b> |
| No                                                                                      | 242 (74.5%)   | 53 (75.7%)  | 183 (75.9%)  | 6 (42.9%)   | -                |
| Blood glucose not measured                                                              | 43 (13.2%)    | 2 (2.9%)    | 33 (13.7%)   | 8 (57.1%)   | -                |
| Missing                                                                                 | 1 (0.3%)      | 0 (0.0%)    | 1 (0.4%)     | 0 (0.0%)    | -                |
| Did the patient have a ruptured sac?                                                    |               |             |              |             |                  |
| Yes                                                                                     | 34 (10.5%)    | 6 (8.6%)    | 27 (11.2%)   | 1 (7.1%)    | 0.760            |

|                                                                                                          |             |             |             |             |        |
|----------------------------------------------------------------------------------------------------------|-------------|-------------|-------------|-------------|--------|
| No                                                                                                       | 288 (88.6%) | 64 (91.4%)  | 212 (88.0%) | 12 (85.7%)  | -      |
| Missing                                                                                                  | 3 (0.9%)    | 0 (0.0%)    | 2 (0.8%)    | 1 (7.1%)    | -      |
| <b>Care prior to presentation at the paediatric surgery centre:</b>                                      |             |             |             |             |        |
| Antenatal ultrasound undertaken?                                                                         |             |             |             |             |        |
| Yes: study condition diagnosed                                                                           | 158 (48.6%) | 57 (81.4%)  | 101 (41.9%) | 0 (0.0%)    | <0.001 |
| Yes: problem identified but study condition not diagnosed                                                | 24 (7.4%)   | 8 (11.4%)   | 16 (6.6%)   | 0 (0.0%)    | -      |
| Yes: no problem identified                                                                               | 95 (29.2%)  | 4 (5.7%)    | 85 (35.3%)  | 6 (42.9%)   | -      |
| No                                                                                                       | 48 (14.8%)  | 1 (1.4%)    | 39 (16.2%)  | 8 (57.1%)   | -      |
| Median gestational age of study condition diagnosis if diagnosis was antenatal (IQR), weeks              | 23 (15)     | 21 (18)     | 24 (13)     | -           | 0.999  |
| Mode of transport to hospital:                                                                           |             |             |             |             |        |
| Ambulance                                                                                                | 118 (36.3%) | 20 (28.6%)  | 89 (36.9%)  | 9 (64.3%)   | <0.001 |
| Other transport provided by the health service                                                           | 17 (5.2%)   | 6 (8.6%)    | 10 (4.1%)   | 1 (7.1%)    | -      |
| Patient's own transport                                                                                  | 79 (24.3%)  | 0 (0.0%)    | 75 (31.1%)  | 4 (28.6%)   | -      |
| Born within the study hospital                                                                           | 111 (34.2%) | 44 (62.9%)  | 67 (27.8%)  | 0 (0.0%)    | -      |
| If out born, where did the patient present from?                                                         |             |             |             |             |        |
| Home                                                                                                     | 21 (9.8%)   | 0 (0.0%)    | 21 (12.1%)  | 0 (0.0%)    | 0.036  |
| Community Clinic/General Practice                                                                        | 35 (16.4%)  | 0 (0.0%)    | 32 (18.4%)  | 3 (21.4%)   | -      |
| District Hospital                                                                                        | 155 (72.4%) | 26 (100.0%) | 118 (67.8%) | 11 (78.6%)  | -      |
| Unknown                                                                                                  | 2 (0.9%)    | 0 (0.0%)    | 2 (1.1%)    | 0 (0.0%)    | -      |
| Missing                                                                                                  | 1 (0.5%)    | 0 (0.0%)    | 1 (0.6%)    | 0 (0.0%)    | -      |
| <b>Perioperative care at the paediatric surgery centre:</b>                                              |             |             |             |             |        |
| If septic, were appropriate antibiotics administered?                                                    |             |             |             |             |        |
| Yes within 1 hour of arrival                                                                             | 27 (67.5%)  | 1 (100.0%)  | 23 (65.7%)  | 3 (75.0%)   | 0.73   |
| Yes: within the first day of arrival                                                                     | 13 (32.5%)  | 0 (0.0%)    | 12 (34.3%)  | 1 (25.0%)   | -      |
| No                                                                                                       | 0 (0.0%)    | 0 (0.0%)    | 0 (0.0%)    | 0 (0.0%)    | -      |
| If hypovolaemic, was an intravenous fluid bolus given?                                                   |             |             |             |             |        |
| Yes within 1 hour of arrival                                                                             | 19 (65.5%)  | 2 (40.0%)   | 16 (72.7%)  | 1 (50.0%)   | 0.200  |
| Yes: within the first day of arrival                                                                     | 9 (31.0%)   | 2 (40.0%)   | 6 (27.3%)   | 1 (50.0%)   | -      |
| No                                                                                                       | 1 (3.4%)    | 1 (20.0%)   | 0 (0.0%)    | 0 (0.0%)    | -      |
| If hypovolaemic, how much intravenous fluid was given?                                                   |             |             |             |             |        |
| 10 - 20mls/kg                                                                                            | 22 (78.6%)  | 2 (50.0%)   | 18 (81.8%)  | 2 (100.0%)  | 0.270  |
| Above 20mls/kg                                                                                           | 6 (21.4%)   | 2 (50.0%)   | 4 (18.2%)   | 0 (0.0%)    | -      |
| If hypothermic, was the patient warmed on arrival to your hospital to within a normal temperature range? |             |             |             |             |        |
| Yes                                                                                                      | 25 (78.1%)  | 3 (75.0%)   | 19 (76.0%)  | 3 (100.0%)  | 0.630  |
| No                                                                                                       | 7 (21.9%)   | 1 (25.0%)   | 6 (24.0%)   | 0 (0.0%)    | -      |
| Did the patient receive central venous access?                                                           |             |             |             |             |        |
| Yes: umbilical catheter                                                                                  | 6 (1.8%)    | 4 (5.7%)    | 2 (0.8%)    | 0 (0.0%)    | 0.025  |
| Yes: peripherally inserted central catheter (PICC)                                                       | 103 (31.7%) | 35 (50.0%)  | 67 (27.8%)  | 1 (7.1%)    | <0.001 |
| Yes: percutaneously inserted central line with ultrasound guidance                                       | 24 (7.4%)   | 13 (18.6%)  | 11 (4.6%)   | 0 (0.0%)    | <0.001 |
| Yes: surgically placed central line (open insertion)                                                     | 16 (4.9%)   | 2 (2.9%)    | 14 (5.8%)   | 0 (0.0%)    | 0.413  |
| No                                                                                                       | 184 (56.6%) | 21 (30.0%)  | 150 (62.2%) | 13 (92.9%)  | <0.001 |
| Median total duration of antibiotics following primary intervention (IQR), days                          | 7 (10)      | 3 (12)      | 7 (11)      | 4 (7)       | 0.001  |
| Did the patient receive a blood transfusion?                                                             |             |             |             |             |        |
| Yes: not cross-matched                                                                                   | 4 (1.2%)    | 2 (2.9%)    | 2 (0.8%)    | 0 (0.0%)    | 0.380  |
| Yes: cross-matched.                                                                                      | 83 (25.5%)  | 17 (24.3%)  | 65 (27.0%)  | 1 (7.1%)    | -      |
| No: not required.                                                                                        | 233 (71.7%) | 51 (72.9%)  | 169 (70.1%) | 13 (92.9%)  | -      |
| No: it was required but not available.                                                                   | 4 (1.2%)    | 0 (0.0%)    | 4 (1.7%)    | 0 (0.0%)    | -      |
| Missing                                                                                                  | 1 (0.3%)    | 0 (0.0%)    | 1 (0.4%)    | 0 (0.0%)    | -      |
| Did the patient require ventilation?                                                                     |             |             |             |             |        |
| Yes: and it was given                                                                                    | 144 (44.3%) | 48 (68.6%)  | 96 (39.8%)  | 0 (0.0%)    | <0.001 |
| Yes, but it was not available                                                                            | 6 (1.8%)    | 0 (0.0%)    | 6 (2.5%)    | 0 (0.0%)    | -      |
| No                                                                                                       | 175 (53.8%) | 22 (31.4%)  | 139 (57.7%) | 14 (100.0%) | -      |
| Median time patient remained on ventilation if given (IQR), days                                         | 4 (10)      | 6 (11)      | 4 (8)       | -           | 0.389  |
| Median time to first enteral feed (post-primary intervention) (IQR), days                                | 3 (4)       | 3 (7)       | 3 (4)       | 3 (2)       | 0.821  |
| Median time to full enteral feeds (post-primary intervention) (IQR), days                                | 6 (12)      | 12 (22)     | 5 (9)       | 30 (29)     | 0.001  |
| Did the patient require parenteral nutrition?                                                            |             |             |             |             |        |
| Yes: and it was given                                                                                    | 154 (47.4%) | 54 (77.1%)  | 100 (41.5%) | 0 (0.0%)    | <0.001 |
| Yes: and it was sometimes available, but less than required                                              | 8 (2.5%)    | 0 (0.0%)    | 8 (3.3%)    | 0 (0.0%)    | -      |
| Yes: but it was not available                                                                            | 5 (1.5%)    | 0 (0.0%)    | 4 (1.7%)    | 1 (7.1%)    | -      |
| No                                                                                                       | 158 (48.6%) | 16 (22.9%)  | 129 (53.5%) | 13 (92.9%)  | -      |
| Median time patient received parenteral nutrition if received (IQR), days                                | 11 (15)     | 13 (24)     | 10 (14)     | -           | 0.199  |
| <b>Surgical intervention:</b>                                                                            |             |             |             |             |        |
| Median time from arrival at your hospital to primary intervention (IQR), hours                           | 11 (23)     | 12 (21)     | 10 (27)     | 10 (58)     | 0.902  |
| Primary intervention:                                                                                    |             |             |             |             |        |
| Primary operative closure                                                                                | 164 (50.5%) | 41 (58.6%)  | 119 (49.4%) | 4 (28.6%)   | 0.081  |
| Conservative management                                                                                  | 120 (36.9%) | 18 (25.7%)  | 97 (40.2%)  | 5 (35.7%)   | -      |
| Staged closure                                                                                           | 32 (9.8%)   | 11 (15.7%)  | 21 (8.7%)   | 0 (0.0%)    | -      |
| Missing                                                                                                  | 9 (2.8%)    | 0 (0.0%)    | 4 (1.7%)    | 5 (35.7%)   | -      |

|                                                                                                                  |             |            |             |            |                  |
|------------------------------------------------------------------------------------------------------------------|-------------|------------|-------------|------------|------------------|
| If conservative management, was a topical treatment applied to the exomphalos sac?                               |             |            |             |            |                  |
| Yes: silver sulfadiazine                                                                                         | 39 (32.5%)  | 4 (22.2%)  | 35 (36.1%)  | 0 (0.0%)   | 0.310            |
| Yes: betadine                                                                                                    | 9 (7.5%)    | 2 (11.1%)  | 6 (6.2%)    | 1 (20.0%)  | -                |
| Yes: honey                                                                                                       | 11 (9.2%)   | 1 (5.6%)   | 10 (10.3%)  | 0 (0.0%)   | -                |
| Yes: merbromide tannage                                                                                          | 2 (1.7%)    | 0 (0.0%)   | 2 (2.1%)    | 0 (0.0%)   | -                |
| Yes: other                                                                                                       | 45 (37.5%)  | 7 (38.9%)  | 36 (37.1%)  | 2 (40.0%)  | -                |
| No                                                                                                               | 14 (11.7%)  | 4 (22.2%)  | 8 (8.2%)    | 2 (40.0%)  | -                |
| If staged closure, median time from primary intervention to closure, IQR days                                    | 19 (22)     | 8 (18)     | 22 (16)     | -          | <b>0.051</b>     |
| What is the plan for future management?                                                                          |             |            |             |            |                  |
| No further surgery planned                                                                                       | 22 (18.3%)  | 7 (38.9%)  | 12 (12.4%)  | 3 (60.0%)  | <b>0.036</b>     |
| Delayed closure at this hospital                                                                                 | 88 (73.3%)  | 10 (55.6%) | 76 (78.4%)  | 2 (40.0%)  | -                |
| Delayed closure at another hospital                                                                              | 2 (1.7%)    | 0 (0.0%)   | 2 (2.1%)    | 0 (0.0%)   | -                |
| Patient died during primary admission                                                                            | 8 (6.7%)    | 1 (5.6%)   | 7 (7.2%)    | 0 (0.0%)   | -                |
| What type of anaesthesia was used for the primary intervention?                                                  |             |            |             |            |                  |
| General anaesthesia with endotracheal tube                                                                       | 200 (61.5%) | 47 (67.1%) | 149 (61.8%) | 4 (28.6%)  | <b>&lt;0.001</b> |
| General anaesthesia with laryngeal airway                                                                        | 0 (0.0%)    | 0 (0.0%)   | 0 (0.0%)    | 0 (0.0%)   | -                |
| Ketamine anaesthesia                                                                                             | 1 (0.3%)    | 0 (0.0%)   | 1 (0.4%)    | 0 (0.0%)   | -                |
| Spinal/caudal anaesthesia                                                                                        | 0 (0.0%)    | 0 (0.0%)   | 0 (0.0%)    | 0 (0.0%)   | -                |
| Local anaesthesia only                                                                                           | 2 (0.6%)    | 0 (0.0%)   | 2 (0.8%)    | 0 (0.0%)   | -                |
| No anaesthesia, just analgesia                                                                                   | 14 (4.3%)   | 10 (14.3%) | 4 (1.7%)    | 0 (0.0%)   | -                |
| No anaesthesia, no analgesia                                                                                     | 42 (12.9%)  | 3 (4.3%)   | 39 (16.2%)  | 0 (0.0%)   | -                |
| Not applicable: no surgery or primary intervention undertaken.                                                   | 65 (20.0%)  | 10 (14.3%) | 45 (18.7%)  | 10 (71.4%) | -                |
| Missing                                                                                                          | 1 (0.3%)    | 0 (0.0%)   | 1 (0.4%)    | 0 (0.0%)   | -                |
| Who undertook the anaesthetic for the primary intervention?                                                      |             |            |             |            |                  |
| Anaesthetic doctor                                                                                               | 193 (59.4%) | 45 (64.3%) | 147 (61.0%) | 1 (7.1%)   | <b>&lt;0.001</b> |
| Anaesthetic nurse                                                                                                | 4 (1.2%)    | 0 (0.0%)   | 1 (0.4%)    | 3 (21.4%)  | -                |
| Medical officer                                                                                                  | 1 (0.3%)    | 1 (1.4%)   | 0 (0.0%)    | 0 (0.0%)   | -                |
| Surgeon                                                                                                          | 2 (0.6%)    | 1 (1.4%)   | 1 (0.4%)    | 0 (0.0%)   | -                |
| Other healthcare professional                                                                                    | 7 (2.2%)    | 2 (2.9%)   | 5 (2.1%)    | 0 (0.0%)   | -                |
| No anaesthetic undertaken                                                                                        | 117 (36.0%) | 21 (30.0%) | 86 (35.7%)  | 10 (71.4%) | -                |
| Missing                                                                                                          | 1 (0.3%)    | 0 (0.0%)   | 1 (0.4%)    | 0 (0.0%)   | -                |
| Who undertook the primary intervention?                                                                          |             |            |             |            |                  |
| Paediatric surgeon (or junior with paediatric surgeon assisting/in the room)                                     | 238 (73.2%) | 61 (87.1%) | 176 (73.0%) | 1 (7.1%)   | <b>&lt;0.001</b> |
| General surgeon (or junior with general surgeon assisting/in the room)                                           | 2 (0.6%)    | 0 (0.0%)   | 0 (0.0%)    | 2 (14.3%)  | -                |
| Junior doctor, medical officer or other (without a paediatric or general surgeon assisting/in the room)          | 12 (3.7%)   | 1 (1.4%)   | 11 (4.6%)   | 0 (0.0%)   | -                |
| Trainee surgeon (without a paediatric or general surgeon assisting or in the room)                               | 8 (2.5%)    | 0 (0.0%)   | 7 (2.9%)    | 1 (7.1%)   | -                |
| Not applicable - no surgery or primary intervention undertaken.                                                  | 64 (19.7%)  | 8 (11.4%)  | 46 (19.1%)  | 10 (71.4%) | -                |
| Missing                                                                                                          | 1 (0.3%)    | 0 (0.0%)   | 1 (0.4%)    | 0 (0.0%)   | -                |
| Was a Surgical Safety Checklist used at the time of primary intervention?                                        |             |            |             |            |                  |
| Yes                                                                                                              | 171 (52.6%) | 48 (68.6%) | 120 (49.8%) | 3 (21.4%)  | <b>&lt;0.001</b> |
| No: but it was available                                                                                         | 24 (7.4%)   | 2 (2.9%)   | 22 (9.1%)   | 0 (0.0%)   | -                |
| No: it was not available                                                                                         | 17 (5.2%)   | 2 (2.9%)   | 14 (5.8%)   | 1 (7.1%)   | -                |
| Not applicable: a conservative primary intervention was undertaken                                               | 57 (17.5%)  | 11 (15.7%) | 46 (19.1%)  | 0 (0.0%)   | -                |
| Not applicable: no surgery or primary intervention undertaken                                                    | 55 (16.9%)  | 7 (10.0%)  | 38 (15.8%)  | 10 (71.4%) | -                |
| Missing                                                                                                          | 1 (0.3%)    | 0 (0.0%)   | 1 (0.4%)    | 0 (0.0%)   | -                |
| <b>Outcomes:</b>                                                                                                 |             |            |             |            |                  |
| Did the patient survive to discharge (or 30-days if still an in-patient 30-days following primary intervention)? |             |            |             |            |                  |
| Yes                                                                                                              | 260 (80.0%) | 58 (82.9%) | 192 (79.7%) | 10 (71.4%) | <b>0.600</b>     |
| No                                                                                                               | 65 (20.0%)  | 12 (17.1%) | 49 (20.3%)  | 4 (28.6%)  | -                |
| If the patient was discharged prior, were they still alive at 30-days following primary intervention?            |             |            |             |            |                  |
| Yes                                                                                                              | 231 (89.2%) | 53 (91.4%) | 176 (92.1%) | 2 (20.0%)  | <b>&lt;0.001</b> |
| No                                                                                                               | 0 (0.0%)    | 0 (0.0%)   | 0 (0.0%)    | 0 (0.0%)   | -                |
| Not followed-up after discharge                                                                                  | 17 (6.6%)   | 2 (3.4%)   | 7 (3.7%)    | 8 (80.0%)  | -                |
| Followed-up, but not until 30-days post primary intervention                                                     | 11 (4.2%)   | 3 (5.2%)   | 8 (4.2%)    | 0 (0.0%)   | -                |
| Cause of mortality:                                                                                              |             |            |             |            |                  |
| Sepsis                                                                                                           | 21 (32.3%)  | 0 (0.0%)   | 20 (40.8%)  | 1 (25.0%)  | 0.069            |
| Cardiac failure                                                                                                  | 15 (23.1%)  | 3 (25.0%)  | 10 (20.4%)  | 2 (50.0%)  | -                |
| Respiratory failure                                                                                              | 13 (20.0%)  | 3 (25.0%)  | 10 (20.4%)  | 0 (0.0%)   | -                |
| Aspiration pneumonia                                                                                             | 4 (6.2%)    | 0 (0.0%)   | 4 (8.2%)    | 0 (0.0%)   | -                |
| Haemorrhage                                                                                                      | 3 (4.6%)    | 1 (8.3%)   | 2 (4.1%)    | 0 (0.0%)   | -                |
| Ruptured exomphalos sac                                                                                          | 2 (3.1%)    | 1 (8.3%)   | 1 (2.0%)    | 0 (0.0%)   | -                |
| Electrolyte disturbance                                                                                          | 1 (1.5%)    | 1 (8.3%)   | 0 (0.0%)    | 0 (0.0%)   | -                |
| Syndrome incompatible with life                                                                                  | 1 (1.5%)    | 1 (8.3%)   | 0 (0.0%)    | 0 (0.0%)   | -                |
| Other                                                                                                            | 4 (6.2%)    | 2 (16.7%)  | 1 (2.1%)    | 1 (25.0%)  | -                |
| Missing                                                                                                          | 1 (1.5%)    | 0 (0.0%)   | 1 (2.0%)    | 0 (0.0%)   | -                |
| Median duration of hospital stays, (IQR) days                                                                    | 13 (15.0)   | 16 (22.0)  | 12 (15.0)   | 10 (8.0)   | 0.059            |
| Did the patient have a surgical site infection?                                                                  |             |            |             |            |                  |
| Yes                                                                                                              | 32 (9.8%)   | 7 (10.0%)  | 25 (10.4%)  | 0 (0.0%)   | <b>0.025</b>     |
| No                                                                                                               | 191 (58.8%) | 50 (71.4%) | 135 (56.0%) | 6 (42.9%)  | -                |

|                                                                                                          |             |            |             |            |                  |
|----------------------------------------------------------------------------------------------------------|-------------|------------|-------------|------------|------------------|
| Not applicable, no surgical wound                                                                        | 101 (31.1%) | 13 (18.6%) | 80 (33.2%)  | 8 (57.1%)  | -                |
| Missing                                                                                                  | 1 (0.3%)    | 0 (0.0%)   | 1 (0.4%)    | 0 (0.0%)   | -                |
| Did the patient have a full thickness wound dehiscence?                                                  |             |            |             |            |                  |
| Yes                                                                                                      | 11 (3.4%)   | 2 (2.9%)   | 9 (3.7%)    | 0 (0.0%)   | <b>0.034</b>     |
| No                                                                                                       | 214 (65.8%) | 55 (78.6%) | 153 (63.5%) | 6 (42.9%)  | -                |
| Not applicable, no surgical wound                                                                        | 99 (30.5%)  | 13 (18.6%) | 78 (32.4%)  | 8 (57.1%)  | -                |
| Missing                                                                                                  | 1 (0.3%)    | 0 (0.0%)   | 1 (0.4%)    | 0 (0.0%)   | -                |
| Did the patient require a further unplanned intervention?                                                |             |            |             |            |                  |
| Yes – percutaneous                                                                                       | 1 (0.3%)    | 0 (0.0%)   | 1 (0.4%)    | 0 (0.0%)   | <b>&lt;0.001</b> |
| Yes – surgical intervention                                                                              | 30 (9.2%)   | 8 (11.4%)  | 21 (8.7%)   | 1 (7.1%)   | -                |
| No                                                                                                       | 243 (74.8%) | 56 (80.0%) | 183 (75.9%) | 4 (28.6%)  | -                |
| Not applicable – no primary intervention undertaken                                                      | 50 (15.4%)  | 6 (8.6%)   | 35 (14.5%)  | 9 (64.3%)  | -                |
| Missing                                                                                                  | 1 (0.3%)    | 0 (0.0%)   | 1 (0.4%)    | 0 (0.0%)   | -                |
| If central line access required, did the patient acquire central line sepsis?                            |             |            |             |            |                  |
| Yes, diagnosed clinically                                                                                | 4 (2.9%)    | 0 (0.0%)   | 4 (4.4%)    | 0 (0.0%)   | 0.520            |
| Yes, confirmed on microbiology                                                                           | 9 (6.4%)    | 2 (4.1%)   | 7 (7.8%)    | 0 (0.0%)   | -                |
| No                                                                                                       | 127 (90.7%) | 47 (95.9%) | 79 (87.8%)  | 1 (100.0%) | -                |
| Was the patient followed up at 30-days post primary surgery or intervention to assess for complications? |             |            |             |            |                  |
| Yes: reviewed in person                                                                                  | 165 (63.5%) | 33 (56.9%) | 130 (67.7%) | 2 (20.0%)  | <b>&lt;0.001</b> |
| Yes: via telephone consultation                                                                          | 19 (7.3%)   | 1 (1.7%)   | 18 (9.4%)   | 0 (0.0%)   | -                |
| Yes: via other means                                                                                     | 2 (0.8%)    | 1 (1.7%)   | 1 (0.5%)    | 0 (0.0%)   | -                |
| Yes: still an in-patient at 30-days                                                                      | 31 (11.9%)  | 13 (22.4%) | 18 (9.4%)   | 0 (0.0%)   | -                |
| No: data is based on in-patient observations only                                                        | 24 (9.2%)   | 5 (8.6%)   | 13 (6.8%)   | 6 (60.0%)  | -                |
| No: follow-up was done, but prior to 30-days                                                             | 19 (7.3%)   | 5 (8.6%)   | 12 (6.3%)   | 2 (20.0%)  | -                |
| If the patient had a complication, when was it diagnosed?                                                |             |            |             |            |                  |
| During the primary admission                                                                             | 69 (21.2%)  | 18 (25.7%) | 49 (20.3%)  | 2 (14.3%)  | 0.660            |
| As an emergency re-attender                                                                              | 6 (1.8%)    | 1 (1.4%)   | 5 (2.1%)    | 0 (0.0%)   | -                |
| At routine follow-up as an out-patient                                                                   | 7 (2.2%)    | 0 (0.0%)   | 7 (2.9%)    | 0 (0.0%)   | -                |
| Not applicable, no complications                                                                         | 242 (74.5%) | 51 (72.9%) | 179 (74.3%) | 12 (85.7%) | -                |
| Missing                                                                                                  | 1 (0.3%)    | 0 (0.0%)   | 1 (0.4%)    | 0 (0.0%)   | -                |

\*Patients born in hospital = 0. Percentages have been rounded to 1 decimal place and may not total 100.0%. HIC: High-income countries. IQR: Interquartile range. LIC: Low-income countries. MIC: Middle-income countries.

**Supplementary Table 6: Characteristics, perioperative care, surgical interventions, and outcomes for patients with anorectal malformation**

| Variable                                                                                | Total<br>(n=991) | HIC<br>(n=178) | MIC<br>(n=788) | LIC<br>(n=25) | P value          |
|-----------------------------------------------------------------------------------------|------------------|----------------|----------------|---------------|------------------|
| <b>Patient Characteristics:</b>                                                         |                  |                |                |               |                  |
| Median gestational age at birth (IQR), weeks                                            | 38 (2)           | 39(3)          | 38(2)          | 38(3)         | <b>0·003</b>     |
| Median age at presentation (IQR), hours                                                 | 24 (68)          | 7 (27)         | 24 (67)        | 96 (696)      | <b>&lt;0·001</b> |
| Sex:                                                                                    |                  |                |                |               |                  |
| Male                                                                                    | 575 (58·0%)      | 106 (59·6%)    | 454 (57·6%)    | 15 (60·0%)    | 0·850            |
| Female                                                                                  | 398 (40·2%)      | 71 (39·9%)     | 317 (40·2%)    | 10 (40·0%)    | -                |
| Ambiguous                                                                               | 17 (1·7%)        | 1 (0·6%)       | 16 (2·0%)      | 0 (0·0%)      | -                |
| Unknown                                                                                 | 1 (0·1%)         | 0 (0·0%)       | 1 (0·1%)       | 0 (0·0%)      | -                |
| Median weight at presentation (IQR), kg                                                 | 3·0 (1·0)        | 3·0 (0·9)      | 3·0 (1·0)      | 3·2 (1·4)     | 0·125            |
| Does the patient have another anomaly in addition to the study condition?               |                  |                |                |               |                  |
| Yes: Cardiovascular                                                                     | 324 (32·7%)      | 88 (49·4%)     | 232 (29·4%)    | 4 (16·0%)     | <b>&lt;0·001</b> |
| Yes: Respiratory                                                                        | 25 (2·5%)        | 6 (3·4%)       | 19 (2·4%)      | 0 (0·0%)      | -                |
| Yes: Gastrointestinal                                                                   | 93 (9·4%)        | 15 (8·4%)      | 78 (9·9%)      | 0 (0·0%)      | -                |
| Yes: Neurological                                                                       | 66 (6·7%)        | 27 (15·2%)     | 37 (4·7%)      | 2 (8·0%)      | <b>&lt;0·001</b> |
| Yes: Genito-urinary                                                                     | 191 (19·3%)      | 56 (31·5%)     | 133 (16·9%)    | 2 (8·0%)      | <b>&lt;0·001</b> |
| Yes: Musculoskeletal                                                                    | 109 (11·0%)      | 34 (19·1%)     | 73 (9·3%)      | 2 (8·0%)      | <b>&lt;0·001</b> |
| Yes: Down syndrome                                                                      | 57 (5·8%)        | 11 (6·2%)      | 46 (5·8%)      | 0 (0·0%)      | -                |
| Yes: Beckwith Wiedemann syndrome                                                        | 1 (0·1%)         | 0 (0·0%)       | 1 (0·1%)       | 0 (0·0%)      | -                |
| Yes: Cystic fibrosis                                                                    | 1 (0·1%)         | 0 (0·0%)       | 1 (0·1%)       | 0 (0·0%)      | -                |
| Yes: Chromosomal                                                                        | 24 (2·4%)        | 3 (1·7%)       | 21 (2·7%)      | 0 (0·0%)      | -                |
| Yes: Other                                                                              | 67 (6·8%)        | 8 (4·5%)       | 59 (7·5%)      | 0 (0·0%)      | -                |
| No                                                                                      | 441 (44·5%)      | 58 (32·6%)     | 365 (46·3%)    | 18 (72·0%)    | <b>&lt;0·001</b> |
| Median distance from patient's home to hospital (IQR), km*                              | 32 (93)          | 20 (76)        | 35 (100)       | 80 (113)      | <b>&lt;0·001</b> |
| Type of delivery:                                                                       |                  |                |                |               |                  |
| Vaginal (spontaneous)                                                                   | 520 (52·5%)      | 92 (51·7%)     | 410 (52·0%)    | 18 (72·0%)    | <b>0·003</b>     |
| Vaginal (induced)                                                                       | 42 (4·2%)        | 12 (6·7%)      | 30 (3·8%)      | 0 (0·0%)      | -                |
| Caesarean section (elective)                                                            | 240 (24·2%)      | 27 (15·2%)     | 208 (26·4%)    | 5 (20·0%)     | -                |
| Caesarean section (urgent/non-elective)                                                 | 177 (17·9%)      | 44 (24·7%)     | 132 (16·8%)    | 1 (4·0%)      | -                |
| Unknown                                                                                 | 12 (1·2%)        | 3 (1·7%)       | 8 (1·0%)       | 1 (4·0%)      | -                |
| Was the patient septic on arrival to your hospital?                                     |                  |                |                |               |                  |
| Yes                                                                                     | 112 (11·3%)      | 2 (1·1%)       | 107 (13·6%)    | 3 (12·0%)     | <b>&lt;0·001</b> |
| No                                                                                      | 879 (88·7%)      | 176 (98·9%)    | 681 (86·4%)    | 22 (88·0%)    | -                |
| Was the patient hypovolaemic on arrival to your hospital?                               |                  |                |                |               |                  |
| Yes                                                                                     | 71 (7·2%)        | 10 (5·6%)      | 61 (7·7%)      | 0 (0·0%)      | 0·230            |
| No                                                                                      | 919 (92·7%)      | 168 (94·4%)    | 726 (92·1%)    | 25 (100·0%)   | -                |
| Missing                                                                                 | 1 (0·1%)         | 0 (0·0%)       | 1 (0·1%)       | 0 (0·0%)      | -                |
| Was the patient hypothermic on arrival to your hospital?                                |                  |                |                |               |                  |
| Yes                                                                                     | 60 (6·1%)        | 5 (2·8%)       | 53 (6·7%)      | 2 (8·0%)      | 0·130            |
| No                                                                                      | 930 (93·8%)      | 173 (97·2%)    | 734 (93·1%)    | 23 (92·0%)    | -                |
| Missing                                                                                 | 1 (0·1%)         | 0 (0·0%)       | 1 (0·1%)       | 0 (0·0%)      | -                |
| American Society of Anaesthesiologists (ASA) Score at the time of primary intervention: |                  |                |                |               |                  |
| 1. Healthy person                                                                       | 276 (27·9%)      | 43 (24·2%)     | 222 (28·2%)    | 11 (44·0%)    | 0·180            |
| 2. Mild systemic disease                                                                | 357 (36·0%)      | 73 (41·0%)     | 277 (35·2%)    | 7 (28·0%)     | -                |
| 3. Severe systemic disease                                                              | 172 (17·4%)      | 32 (18·0%)     | 136 (17·3%)    | 4 (16·0%)     | -                |
| 4. Severe systemic disease that is a constant threat to life                            | 58 (5·9%)        | 14 (7·9%)      | 44 (5·6%)      | 0 (0·0%)      | -                |
| 5. A moribund patient who is not expected to survive without the operation              | 32 (3·2%)        | 2 (1·1%)       | 30 (3·8%)      | 0 (0·0%)      | -                |
| Not applicable - no intervention                                                        | 93 (9·4%)        | 12 (6·7%)      | 78 (9·9%)      | 3 (12·0%)     | -                |
| Missing                                                                                 | 3 (0·3%)         | 2 (1·1%)       | 1 (0·1%)       | 0 (0·0%)      | -                |
| What study condition does the patient have?                                             |                  |                |                |               |                  |
| Oesophageal atresia                                                                     | 53 (5·3%)        | 10 (5·6%)      | 42 (5·3%)      | 1 (4·0%)      | 0·940            |
| Congenital diaphragmatic hernia                                                         | 1 (0·1%)         | 1 (0·6%)       | 0 (0·0%)       | 0 (0·0%)      | 0·100            |
| Intestinal atresia                                                                      | 12 (1·2%)        | 3 (1·7%)       | 9 (1·1%)       | 0 (0·0%)      | 0·710            |
| Gastroschisis                                                                           | 0 (0·0%)         | 0 (0·0%)       | 0 (0·0%)       | 0 (0·0%)      | -                |
| Exomphalos/Omphalocele                                                                  | 0 (0·0%)         | 0 (0·0%)       | 0 (0·0%)       | 0 (0·0%)      | -                |
| Anorectal malformation                                                                  | 991 (100·0%)     | 178 (100·0%)   | 788 (100·0%)   | 25 (100·0%)   | -                |
| Hirschsprung's Disease                                                                  | 0 (0·0%)         | 0 (0·0%)       | 0 (0·0%)       | 0 (0·0%)      | -                |
| Type of anorectal malformation (Krackenbeck classification)                             |                  |                |                |               |                  |
| Low ARM: Perineal (cutaneous) fistula                                                   | 327 (33·0%)      | 73 (41·0%)     | 252 (32·0%)    | 2 (8·0%)      | <b>&lt;0·001</b> |
| High ARM: Rectourethral fistula (bulbar)                                                | 67 (6·8%)        | 13 (7·3%)      | 53 (6·7%)      | 1 (4·0%)      | -                |
| High ARM: Rectourethral fistula (prostatic)                                             | 33 (3·3%)        | 16 (9·0%)      | 17 (2·2%)      | 0 (0·0%)      | -                |
| High ARM: Rectovesical fistula                                                          | 18 (1·8%)        | 5 (2·8%)       | 12 (1·5%)      | 1 (4·0%)      | -                |
| High ARM: Vestibular fistula                                                            | 152 (15·3%)      | 24 (13·5%)     | 127 (16·1%)    | 1 (4·0%)      | -                |
| High ARM: Cloaca                                                                        | 53 (5·3%)        | 9 (5·1%)       | 42 (5·3%)      | 2 (8·0%)      | -                |
| High ARM: No fistula                                                                    | 135 (13·6%)      | 13 (7·3%)      | 117 (14·8%)    | 5 (20·0%)     | -                |
| High ARM: Type unknown at present                                                       | 134 (13·5%)      | 13 (7·3%)      | 116 (14·7%)    | 5 (20·0%)     | -                |

|                                                                                                          |             |             |             |             |                  |
|----------------------------------------------------------------------------------------------------------|-------------|-------------|-------------|-------------|------------------|
| Rare variant: Pouch colon                                                                                | 10 (1.0%)   | 0 (0.0%)    | 10 (1.3%)   | 0 (0.0%)    | -                |
| Rare variant: Rectal atresia/ stenosis                                                                   | 12 (1.2%)   | 4 (2.2%)    | 7 (0.9%)    | 1 (4.0%)    | -                |
| Rare variant: Rectovaginal fistula                                                                       | 16 (1.6%)   | 3 (1.7%)    | 9 (1.1%)    | 4 (16.0%)   | -                |
| Rare variant: H fistula                                                                                  | 1 (0.1%)    | 0 (0.0%)    | 1 (0.1%)    | 0 (0.0%)    | -                |
| Other                                                                                                    | 32 (3.2%)   | 5 (2.8%)    | 24 (3.0%)   | 3 (12.0%)   | -                |
| Missing                                                                                                  | 1 (0.1%)    | 0 (0.0%)    | 1 (0.1%)    | 0 (0.0%)    | -                |
| Did the neonate have pre-operative bowel perforation?                                                    |             |             |             |             |                  |
| Yes                                                                                                      | 37 (3.7%)   | 1 (0.6%)    | 36 (4.6%)   | 0 (0.0%)    | <b>0.023</b>     |
| No                                                                                                       | 951 (96.0%) | 177 (99.4%) | 749 (95.1%) | 25 (100.0%) | -                |
| Missing                                                                                                  | 3 (0.3%)    | 0 (0.0%)    | 3 (0.4%)    | 0 (0.0%)    | -                |
| <b>Care prior to presentation at the paediatric surgery centre:</b>                                      |             |             |             |             |                  |
| Antenatal ultrasound undertaken?                                                                         |             |             |             |             |                  |
| Yes: study condition diagnosed                                                                           | 40 (4.0%)   | 14 (7.9%)   | 26 (3.3%)   | 0 (0.0%)    | <b>&lt;0.001</b> |
| Yes: problem identified but study condition not diagnosed                                                | 121 (12.2%) | 35 (19.7%)  | 85 (10.8%)  | 1 (4.0%)    | -                |
| Yes: no problem identified                                                                               | 662 (66.8%) | 117 (65.7%) | 527 (66.9%) | 18 (72.0%)  | -                |
| No                                                                                                       | 166 (16.8%) | 12 (6.7%)   | 148 (18.8%) | 6 (24.0%)   | -                |
| Missing                                                                                                  | 2 (0.2%)    | 0 (0.0%)    | 2 (0.3%)    | 0 (0.0%)    | -                |
| Median gestational age of study condition antenatal diagnosis (IQR), weeks                               | 28 (12)     | 27.5 (10)   | 27.5 (13)   | -           | 0.243            |
| Mode of transport to hospital:                                                                           |             |             |             |             |                  |
| Ambulance                                                                                                | 404 (40.8%) | 97 (54.5%)  | 300 (38.1%) | 7 (28.0%)   | <b>&lt;0.001</b> |
| Other transport provided by the health service                                                           | 48 (4.8%)   | 18 (10.1%)  | 26 (3.3%)   | 4 (16.0%)   | -                |
| Patient's own transport                                                                                  | 383 (38.6%) | 24 (13.5%)  | 346 (43.9%) | 13 (52.0%)  | -                |
| Born within the hospital                                                                                 | 156 (15.7%) | 39 (21.9%)  | 116 (14.7%) | 1 (4.0%)    | -                |
| If outborn, where did the patient present from?                                                          |             |             |             |             |                  |
| Home                                                                                                     | 173 (20.7%) | 11 (7.9%)   | 159 (23.7%) | 3 (12.5%)   | <b>&lt;0.001</b> |
| Community Clinic/General Practice                                                                        | 130 (15.6%) | 22 (15.8%)  | 102 (15.2%) | 6 (25.0%)   | -                |
| District Hospital                                                                                        | 519 (62.2%) | 106 (76.3%) | 398 (59.2%) | 15 (62.5%)  | -                |
| Unknown                                                                                                  | 12 (1.4%)   | 0 (0.0%)    | 12 (1.8%)   | 0 (0.0%)    | -                |
| Missing                                                                                                  | 1 (0.1%)    | 0 (0.0%)    | 1 (0.1%)    | 0 (0.0%)    | -                |
| <b>Perioperative care at the paediatric surgery centre:</b>                                              |             |             |             |             |                  |
| If septic, were appropriate antibiotics administered?                                                    |             |             |             |             |                  |
| Yes within 1 hour of arrival                                                                             | 84 (75.0%)  | 1 (50%)     | 81 (75.7%)  | 2 (66.7%)   | 0.898            |
| Yes within the first day of arrival                                                                      | 26 (23.2%)  | 1 (50%)     | 24 (4.0%)   | 1 (33.3%)   | -                |
| No                                                                                                       | 2 (1.8%)    | 0 (0%)      | 2 (1.9%)    | 0 (0.0%)    | -                |
| If hypovolaemic, was an intravenous fluid bolus given?                                                   |             |             |             |             |                  |
| Yes within 1 hour of arrival                                                                             | 57 (80.3%)  | 5 (50%)     | 52 (85.3%)  | 0 (0.0%)    | <b>0.008</b>     |
| Yes within the first day of arrival                                                                      | 11 (15.5%)  | 3 (30%)     | 8 (13.1%)   | 0 (0.0%)    | -                |
| No                                                                                                       | 3 (4.3%)    | 2 (20%)     | 1 (1.6%)    | 0 (0.0%)    | -                |
| If hypovolaemic, how much intravenous fluid was given?                                                   |             |             |             |             |                  |
| 10 - 20mls/kg                                                                                            | 50 (73.5%)  | 7 (87.5%)   | 43 (71.7%)  | 0 (0.0%)    | 0.340            |
| Above 20mls/kg                                                                                           | 18 (26.5%)  | 1 (12.5%)   | 17 (28.3%)  | 0 (0.0%)    | -                |
| If hypothermic, was the patient warmed on arrival to your hospital to within a normal temperature range? |             |             |             |             |                  |
| Yes                                                                                                      | 54 (90.0%)  | 5 (100.0%)  | 47 (88.7%)  | 2 (100.0%)  | 0.644            |
| No                                                                                                       | 6 (10%)     | 0 (0.0%)    | 6 (11.3%)   | 0 (0.0%)    | -                |
| Did the patient receive central venous access?                                                           |             |             |             |             |                  |
| Yes: umbilical catheter                                                                                  | 78 (7.9%)   | 24 (13.5%)  | 54 (6.9%)   | 0 (0.0%)    | <b>0.004</b>     |
| Yes: peripherally inserted central catheter (PICC)                                                       | 173 (17.5%) | 42 (23.6%)  | 129 (16.4%) | 2 (8.0%)    | <b>0.033</b>     |
| Yes: percutaneously inserted central line with ultrasound guidance                                       | 50 (5.0%)   | 22 (12.4%)  | 28 (3.6%)   | 0 (0.0%)    | <b>&lt;0.001</b> |
| Yes: surgically placed central line (open insertion)                                                     | 26 (2.6%)   | 0 (0.0%)    | 26 (3.3%)   | 0 (0.0%)    | <b>0.032</b>     |
| No                                                                                                       | 690 (69.6%) | 99 (55.6%)  | 568 (72.1%) | 23 (92.0%)  | <b>&lt;0.001</b> |
| Median total duration of antibiotics following primary intervention (IQR), days                          | 5 (6)       | 3 (4)       | 6 (5)       | 5 (5)       | <b>0.001</b>     |
| Did the patient receive a blood transfusion?                                                             |             |             |             |             |                  |
| Yes: not cross-matched                                                                                   | 7 (0.7%)    | 0 (0.0%)    | 7 (0.9%)    | 0 (0.0%)    | <b>&lt;0.001</b> |
| Yes: cross-matched.                                                                                      | 187 (18.9%) | 15 (8.4%)   | 166 (21.1%) | 6 (24.0%)   | -                |
| No: not required.                                                                                        | 783 (79.0%) | 162 (91.0%) | 604 (76.6%) | 17 (68.0%)  | -                |
| No: it was required but not available.                                                                   | 12 (1.2%)   | 1 (0.6%)    | 9 (1.1%)    | 2 (8.0%)    | -                |
| Missing                                                                                                  | 2 (0.2%)    | 0 (0.0%)    | 2 (0.3%)    | 0 (0.0%)    | -                |
| Did the patient require ventilation?                                                                     |             |             |             |             |                  |
| Yes and it was given                                                                                     | 321 (32.4%) | 81 (45.5%)  | 238 (30.2%) | 2 (8.0%)    | <b>&lt;0.001</b> |
| Yes, but it was not available                                                                            | 12 (1.2%)   | 0 (0.0%)    | 10 (1.3%)   | 2 (8.0%)    | -                |
| No                                                                                                       | 657 (66.3%) | 97 (54.5%)  | 539 (68.4%) | 21 (84.0%)  | -                |
| Missing                                                                                                  | 1 (0.1%)    | 0 (0.0%)    | 1 (0.1%)    | 0 (0.0%)    | -                |
| Median time patient remained on ventilation if given (IQR), days                                         | 2 (3)       | 2 (2)       | 2 (4)       | 3 (3)       | 0.980            |
| Median time to first enteral feed (post-primary intervention) (IQR), days                                | 2 (3)       | 2 (3)       | 2 (3)       | 1 (1)       | <b>0.003</b>     |
| Median time to full enteral feeds (post-primary intervention) (IQR), days                                | 4 (5)       | 5 (6)       | 4 (5)       | 2 (1)       | <b>0.013</b>     |
| Did the patient require parenteral nutrition?                                                            |             |             |             |             |                  |
| Yes and it was given                                                                                     | 358 (36.1%) | 87 (48.9%)  | 271 (34.4%) | 0 (0.0%)    | <b>&lt;0.001</b> |
| Yes and it was sometimes available, but less than required                                               | 12 (1.2%)   | 0 (0.0%)    | 12 (1.5%)   | 0 (0.0%)    | -                |
| Yes, but it was not available                                                                            | 14 (1.4%)   | 0 (0.0%)    | 11 (1.4%)   | 3 (12.0%)   | -                |
| No                                                                                                       | 605 (61.0%) | 91 (51.1%)  | 492 (62.4%) | 22 (88.0%)  | -                |

|                                                                                                                                                                |             |             |             |            |                  |
|----------------------------------------------------------------------------------------------------------------------------------------------------------------|-------------|-------------|-------------|------------|------------------|
| Missing                                                                                                                                                        | 2 (0.2%)    | 0 (0.0%)    | 2 (0.3%)    | 0 (0.0%)   | -                |
| Median time patient received parenteral nutrition if received (IQR), days                                                                                      | 7 (7.0)     | 6 (8.0)     | 7 (7.0)     | 0 (0.0)    | 0.980            |
| <b>Surgical intervention:</b>                                                                                                                                  |             |             |             |            |                  |
| Primary intervention:                                                                                                                                          |             |             |             |            |                  |
| Divided sigmoid colectomy                                                                                                                                      | 306 (30.9%) | 54 (30.3%)  | 247 (31.3%) | 5 (20.0%)  | 0.470            |
| Anoplasty/anorectoplasty                                                                                                                                       | 223 (22.5%) | 37 (20.8%)  | 180 (22.8%) | 6 (24.0%)  | 0.820            |
| Loop sigmoid colectomy                                                                                                                                         | 162 (16.3%) | 28 (15.7%)  | 125 (15.9%) | 9 (36.0%)  | <b>0.027</b>     |
| Fistula dilation and/or washout via fistula (no surgery)                                                                                                       | 94 (9.5%)   | 29 (16.3%)  | 62 (7.9%)   | 3 (12.0%)  | <b>0.002</b>     |
| Posterior sagittal anorectoplasty (PSARP)                                                                                                                      | 83 (8.4%)   | 25 (14.0%)  | 56 (7.1%)   | 2 (8.0%)   | <b>0.010</b>     |
| Palliative care/no intervention                                                                                                                                | 46 (4.6%)   | 3 (1.7%)    | 41 (5.2%)   | 2 (8.0%)   | 0.095            |
| Loop transverse colectomy                                                                                                                                      | 41 (4.1%)   | 3 (1.7%)    | 37 (4.7%)   | 1 (4.0%)   | 0.19             |
| Other stoma                                                                                                                                                    | 30 (3.0%)   | 3 (1.7%)    | 26 (3.3%)   | 1 (4.0%)   | 0.500            |
| Divided transverse colectomy                                                                                                                                   | 29 (2.9%)   | 4 (2.2%)    | 25 (3.2%)   | 0 (0.0%)   | 0.55             |
| Abdominoperineal pull-through                                                                                                                                  | 9 (0.9%)    | 3 (1.7%)    | 6 (0.8%)    | 0 (0.0%)   | 0.450            |
| Laparoscopic-assisted pull-through                                                                                                                             | 1 (0.1%)    | 0 (0.0%)    | 1 (0.1%)    | 0 (0.0%)   | 0.880            |
| Abdominosacroperineal pull-through                                                                                                                             | 1 (0.1%)    | 0 (0.0%)    | 1 (0.1%)    | 0 (0.0%)   | 0.880            |
| Other                                                                                                                                                          | 14 (1.4%)   | 6 (3.4%)    | 8 (1.0%)    | 0 (0.0%)   | <b>0.046</b>     |
| What is the plan for future management?                                                                                                                        |             |             |             |            |                  |
| Anoplasty/ pull-through planned at study hospital                                                                                                              | 535 (54.0%) | 94 (52.8%)  | 430 (54.6%) | 11 (44.0%) | 0.550            |
| Stoma closure planned at study hospital                                                                                                                        | 169 (17.1%) | 33 (18.5%)  | 133 (16.9%) | 3 (12.0%)  | 0.690            |
| No further operative management                                                                                                                                | 67 (6.8%)   | 13 (7.3%)   | 50 (6.3%)   | 4 (16.0%)  | 0.160            |
| Anoplasty/ pull-through planned at another hospital                                                                                                            | 28 (2.8%)   | 5 (2.8%)    | 23 (2.9%)   | 0 (0.0%)   | 0.690            |
| Other surgical procedure                                                                                                                                       | 21 (2.1%)   | 5 (2.8%)    | 14 (1.8%)   | 2 (8.0%)   | 0.081            |
| Patient died or left against medical advice                                                                                                                    | 18 (1.8%)   | 2 (1.1%)    | 16 (2.0%)   | 0 (0.0%)   | 0.560            |
| Stoma closure planned at another hospital                                                                                                                      | 9 (0.9%)    | 3 (1.7%)    | 6 (0.8%)    | 0 (0.0%)   | 0.450            |
| Anal dilatation                                                                                                                                                | 4 (0.4%)    | 1 (0.6%)    | 2 (0.3%)    | 1 (4.0%)   | <b>0.014</b>     |
| If primary anorectal reconstruction was undertaken, was a Peña stimulator or equivalent used to identify the position of the muscle complex intra-operatively? |             |             |             |            |                  |
| Yes                                                                                                                                                            | 206 (67.3%) | 56 (87.5%)  | 147 (62.8%) | 3 (37.5%)  | <b>0.001</b>     |
| No: equipment was not available                                                                                                                                | 67 (21.9%)  | 3 (4.7%)    | 60 (25.6%)  | 4 (50.0%)  | -                |
| No: the equipment was available but not used                                                                                                                   | 33 (10.8%)  | 5 (7.8%)    | 27 (11.5%)  | 1 (12.5%)  | -                |
| Median time from arrival at your hospital to primary intervention (IQR), hours                                                                                 | 24 (36)     | 24 (19)     | 24 (37)     | 36 (72)    | 0.094            |
| What type of anaesthesia was used for the primary intervention?                                                                                                |             |             |             |            |                  |
| General anaesthesia with endotracheal tube                                                                                                                     | 826 (83.4%) | 152 (85.4%) | 658 (83.5%) | 16 (64.0%) | <b>&lt;0.001</b> |
| General anaesthesia with laryngeal airway                                                                                                                      | 15 (1.5%)   | 2 (1.1%)    | 10 (1.3%)   | 3 (12.0%)  | -                |
| Ketamine anaesthesia                                                                                                                                           | 3 (0.3%)    | 0 (0.0%)    | 1 (0.1%)    | 2 (8.0%)   | -                |
| Spinal/caudal anaesthesia                                                                                                                                      | 18 (1.8%)   | 0 (0.0%)    | 18 (2.3%)   | 0 (0.0%)   | -                |
| Local anaesthesia only                                                                                                                                         | 10 (1.0%)   | 0 (0.0%)    | 10 (1.3%)   | 0 (0.0%)   | -                |
| No anaesthesia, just analgesia                                                                                                                                 | 8 (0.8%)    | 3 (1.7%)    | 5 (0.6%)    | 0 (0.0%)   | -                |
| No anaesthesia, no analgesia                                                                                                                                   | 24 (2.4%)   | 12 (6.7%)   | 12 (1.5%)   | 0 (0.0%)   | -                |
| Not applicable: no surgery or primary intervention undertaken.                                                                                                 | 86 (8.7%)   | 9 (5.1%)    | 73 (9.3%)   | 4 (16.0%)  | -                |
| Missing                                                                                                                                                        | 1 (0.1%)    | 0 (0.0%)    | 1 (0.1%)    | 0 (0.0%)   | -                |
| Who undertook the anaesthetic for the primary intervention?                                                                                                    |             |             |             |            |                  |
| Anaesthetic doctor                                                                                                                                             | 847 (85.5%) | 155 (87.1%) | 680 (86.3%) | 12 (48.0%) | <b>&lt;0.001</b> |
| Anaesthetic nurse                                                                                                                                              | 14 (1.4%)   | 0 (0.0%)    | 7 (0.9%)    | 7 (28.0%)  | -                |
| Medical officer                                                                                                                                                | 3 (0.3%)    | 0 (0.0%)    | 1 (0.1%)    | 2 (8.0%)   | -                |
| Surgeon                                                                                                                                                        | 9 (0.9%)    | 0 (0.0%)    | 9 (1.1%)    | 0 (0.0%)   | -                |
| Other healthcare professional                                                                                                                                  | 2 (0.2%)    | 1 (0.6%)    | 1 (0.1%)    | 0 (0.0%)   | -                |
| No anaesthetic undertaken                                                                                                                                      | 114 (11.5%) | 22 (12.4%)  | 88 (11.2%)  | 4 (16.0%)  | -                |
| Missing                                                                                                                                                        | 2 (0.2%)    | 0 (0.0%)    | 2 (0.3%)    | 0 (0.0%)   | -                |
| Who undertook the primary intervention?                                                                                                                        |             |             |             |            |                  |
| Paediatric surgeon (or junior with paediatric surgeon assisting/in the room)                                                                                   | 877 (88.5%) | 167 (93.8%) | 696 (88.3%) | 14 (56.0%) | <b>&lt;0.001</b> |
| General surgeon (or junior with general surgeon assisting/in the room)                                                                                         | 13 (1.3%)   | 0 (0.0%)    | 10 (1.3%)   | 3 (12.0%)  | -                |
| Junior doctor, medical officer or other (without a paediatric or general surgeon assisting/in the room)                                                        | 3 (0.3%)    | 0 (0.0%)    | 1 (0.1%)    | 2 (8.0%)   | -                |
| Trainee surgeon (without a paediatric or general surgeon assisting or in the room)                                                                             | 16 (1.6%)   | 0 (0.0%)    | 13 (1.6%)   | 3 (12.0%)  | -                |
| Not applicable - no surgery or primary intervention undertaken.                                                                                                | 80 (8.1%)   | 10 (5.6%)   | 67 (8.5%)   | 3 (12.0%)  | -                |
| Missing                                                                                                                                                        | 2 (0.2%)    | 1 (0.6%)    | 1 (0.1%)    | 0 (0.0%)   | -                |
| Was a Surgical Safety Checklist used at the time of primary intervention?                                                                                      |             |             |             |            |                  |
| Yes                                                                                                                                                            | 702 (70.8%) | 153 (86.0%) | 540 (68.5%) | 9 (36.0%)  | <b>&lt;0.001</b> |
| No: but it was available                                                                                                                                       | 103 (10.4%) | 3 (1.7%)    | 93 (11.8%)  | 7 (28.0%)  | -                |
| No: it was not available                                                                                                                                       | 71 (7.2%)   | 1 (0.6%)    | 65 (8.2%)   | 5 (20.0%)  | -                |
| Not applicable: a conservative primary intervention was undertaken                                                                                             | 33 (3.3%)   | 13 (7.3%)   | 20 (2.5%)   | 0 (0.0%)   | -                |
| Not applicable: no surgery or primary intervention undertaken                                                                                                  | 81 (8.2%)   | 8 (4.5%)    | 69 (8.8%)   | 4 (16.0%)  | -                |
| Missing                                                                                                                                                        | 1 (0.1%)    | 0 (0.0%)    | 1 (0.1%)    | 0 (0.0%)   | -                |
| <b>Outcomes:</b>                                                                                                                                               |             |             |             |            |                  |
| Did the patient survive to discharge (or 30-days if still an in-patient 30-days following primary intervention)?                                               |             |             |             |            |                  |
| Yes                                                                                                                                                            | 888 (89.6%) | 175 (98.3%) | 693 (87.9%) | 20 (80.0%) | <b>&lt;0.001</b> |
| No                                                                                                                                                             | 103 (10.4%) | 3 (1.7%)    | 95 (12.1%)  | 5 (20.0%)  | -                |
| If the patient was discharged prior, were they still alive at 30-days following primary intervention?                                                          |             |             |             |            |                  |
| Yes                                                                                                                                                            | 797 (89.8%) | 156 (89.1%) | 626 (90.3%) | 15 (75.0%) | <b>0.001</b>     |



|                                                                                                                                                             |               |                |              |               |                  |
|-------------------------------------------------------------------------------------------------------------------------------------------------------------|---------------|----------------|--------------|---------------|------------------|
| No                                                                                                                                                          | 4 (0.4%)      | 0 (0.0%)       | 4 (0.6%)     | 0 (0.0%)      | -                |
| Not followed-up after discharge                                                                                                                             | 40 (4.5%)     | 5 (2.9%)       | 30 (4.3%)    | 5 (25.0%)     | -                |
| Followed-up, but not until 30-days post primary intervention                                                                                                | 44 (5.0%)     | 14 (8.0%)      | 30 (4.3%)    | 0 (0.0%)      | -                |
| Missing                                                                                                                                                     | 3 (0.3%)      | 0 (0.0%)       | 3 (0.4%)     | 0 (0.0%)      | -                |
| <b>Cause of mortality:</b>                                                                                                                                  |               |                |              |               |                  |
| Sepsis                                                                                                                                                      | 39 (36.4%)    | 1 (33.3%)      | 36 (36.4%)   | 2 (40.0%)     | 0.980            |
| Cardiac failure                                                                                                                                             | 30 (28.0%)    | 1 (33.3%)      | 28 (28.3%)   | 1 (20.0%)     | -                |
| Respiratory failure                                                                                                                                         | 20 (18.7%)    | 1 (33.3%)      | 18 (18.2%)   | 1 (20.0%)     | -                |
| Other                                                                                                                                                       | 8 (7.5%)      | 0 (0.0%)       | 7 (7.1%)     | 1 (20.0%)     | -                |
| Aspiration pneumonia                                                                                                                                        | 3 (2.8%)      | 0 (0.0%)       | 3 (3.0%)     | 0 (0.0%)      | -                |
| Electrolyte disturbance                                                                                                                                     | 2 (1.9%)      | 0 (0.0%)       | 2 (2.0%)     | 0 (0.0%)      | -                |
| Haemorrhage                                                                                                                                                 | 2 (1.9%)      | 0 (0.0%)       | 2 (2.0%)     | 0 (0.0%)      | -                |
| Ischaemic bowel                                                                                                                                             | 1 (0.9%)      | 0 (0.0%)       | 1 (1.0%)     | 0 (0.0%)      | -                |
| Enterocolitis                                                                                                                                               | 1 (0.9%)      | 0 (0.0%)       | 1 (1.0%)     | 0 (0.0%)      | -                |
| Missing                                                                                                                                                     | 1 (0.9%)      | 0 (0.0%)       | 1 (1.0%)     | 0 (0.0%)      | -                |
| <b>Median duration of hospital stay, days</b>                                                                                                               | <b>9 (10)</b> | <b>11 (12)</b> | <b>8 (9)</b> | <b>6 (15)</b> | <b>&lt;0.001</b> |
| <b>Did the patient have a surgical site infection?</b>                                                                                                      |               |                |              |               |                  |
| Yes                                                                                                                                                         | 86 (8.7%)     | 15 (8.4%)      | 69 (8.8%)    | 2 (8.0%)      | 0.990            |
| No                                                                                                                                                          | 775 (78.2%)   | 140 (78.7%)    | 616 (78.2%)  | 19 (76.0%)    | -                |
| Not applicable, no surgical wound                                                                                                                           | 128 (12.9%)   | 23 (12.9%)     | 101 (12.8%)  | 4 (16.0%)     | -                |
| Missing                                                                                                                                                     | 2 (0.2%)      | 0 (0.0%)       | 2 (0.3%)     | 0 (0.0%)      | -                |
| <b>Did the patient have a full thickness wound dehiscence?</b>                                                                                              |               |                |              |               |                  |
| Yes                                                                                                                                                         | 38 (3.8%)     | 5 (2.8%)       | 32 (4.1%)    | 1 (4.0%)      | 0.710            |
| No                                                                                                                                                          | 829 (83.7%)   | 150 (84.3%)    | 660 (83.8%)  | 19 (76.0%)    | -                |
| Not applicable, no surgical wound                                                                                                                           | 122 (12.3%)   | 23 (12.9%)     | 94 (11.9%)   | 5 (20.0%)     | -                |
| Missing                                                                                                                                                     | 2 (0.2%)      | 0 (0.0%)       | 2 (0.3%)     | 0 (0.0%)      | -                |
| <b>Did the patient require a further unplanned intervention?</b>                                                                                            |               |                |              |               |                  |
| Yes – percutaneous                                                                                                                                          | 9 (0.9%)      | 3 (1.7%)       | 6 (0.8%)     | 0 (0.0%)      | 0.300            |
| Yes – surgical intervention                                                                                                                                 | 91 (9.2%)     | 10 (5.6%)      | 79 (10.0%)   | 2 (8.0%)      | -                |
| No                                                                                                                                                          | 805 (81.2%)   | 152 (85.4%)    | 634 (80.5%)  | 19 (76.0%)    | -                |
| Not applicable – no primary intervention undertaken                                                                                                         | 83 (8.4%)     | 13 (7.3%)      | 66 (8.4%)    | 4 (16.0%)     | -                |
| Missing                                                                                                                                                     | 3 (0.3%)      | 0 (0.0%)       | 3 (0.4%)     | 0 (0.0%)      | -                |
| <b>If central line access was used, did the patient acquire central line sepsis?</b>                                                                        |               |                |              |               |                  |
| Yes, diagnosed clinically                                                                                                                                   | 7 (2.3%)      | 0 (0.0%)       | 7 (3.2%)     | 0 (0.0%)      | 0.580            |
| Yes, confirmed on microbiology                                                                                                                              | 9 (3.0%)      | 2 (2.5%)       | 7 (3.2%)     | 0 (0.0%)      | -                |
| No                                                                                                                                                          | 289 (94.8%)   | 79 (97.5%)     | 208 (93.7%)  | 2 (100.0%)    | -                |
| <b>Electrolyte disturbance within 30 days of primary intervention</b>                                                                                       |               |                |              |               |                  |
| Yes                                                                                                                                                         | 84 (9.5%)     | 19 (10.7%)     | 62 (7.8%)    | 3 (13.0%)     | <0.001           |
| No                                                                                                                                                          | 751 (85.1%)   | 131 (73.6%)    | 606 (85.8%)  | 14 (60.9%)    | -                |
| Not applicable                                                                                                                                              | 48 (5.4%)     | 4 (2.2%)       | 38 (5.4%)    | 6 (26.1%)     | -                |
| <b>High output stoma (over 20mls/kg/day) within 30 days of primary intervention</b>                                                                         |               |                |              |               |                  |
| Yes                                                                                                                                                         | 14 (1.6%)     | 8 (5.2%)       | 6 (0.8%)     | 0 (0.0%)      | <0.001           |
| No                                                                                                                                                          | 652 (73.9%)   | 102 (66.2%)    | 535 (75.8%)  | 15 (68.2%)    | -                |
| Not applicable                                                                                                                                              | 216 (24.5%)   | 44 (28.6%)     | 165 (23.4%)  | 7 (31.8%)     | -                |
| <b>Stoma prolapse/ retraction/ herniation within 30 days of primary intervention</b>                                                                        |               |                |              |               |                  |
| Yes                                                                                                                                                         | 44 (5.0%)     | 3 (1.9%)       | 39 (5.5%)    | 2 (9.1%)      | 0.110            |
| No                                                                                                                                                          | 622 (70.5%)   | 107 (69.5%)    | 503 (71.2%)  | 12 (54.5%)    | -                |
| Not applicable                                                                                                                                              | 216 (24.5%)   | 44 (28.6%)     | 164 (23.2%)  | 8 (36.4%)     | -                |
| <b>Peri-stoma skin breakdown (or perianal if primary reconstructive surgery undertaken without a covering stoma) within 30 days of primary intervention</b> |               |                |              |               |                  |
| Yes                                                                                                                                                         | 63 (7.1%)     | 10 (6.5%)      | 52 (7.4%)    | 1 (4.3%)      | 0.590            |
| No                                                                                                                                                          | 631 (71.5%)   | 106 (68.8%)    | 510 (72.3%)  | 15 (65.2%)    | -                |
| Not applicable                                                                                                                                              | 188 (21.3%)   | 38 (24.7%)     | 143 (20.3%)  | 7 (30.4%)     | -                |
| <b>Anal stenosis (in patients undergoing primary anorectal reconstruction without covering stoma) within 30 days of primary intervention</b>                |               |                |              |               |                  |
| Yes                                                                                                                                                         | 13 (1.5%)     | 4 (2.6%)       | 9 (1.3%)     | 0 (0.0%)      | <0.001           |
| No                                                                                                                                                          | 551 (62.4%)   | 106 (68.8%)    | 441 (62.5%)  | 4 (17.4%)     | -                |
| Not applicable                                                                                                                                              | 319 (36.1%)   | 44 (28.6%)     | 256 (36.3%)  | 19 (82.6%)    | -                |
| <b>Was the patient followed up at 30-days post primary surgery or intervention to assess for complications?</b>                                             |               |                |              |               |                  |
| Yes: reviewed in person                                                                                                                                     | 531 (59.8%)   | 112 (64.0%)    | 415 (59.9%)  | 4 (20.0%)     | <0.001           |
| Yes: via telephone consultation                                                                                                                             | 140 (15.8%)   | 8 (4.6%)       | 130 (18.8%)  | 2 (10.0%)     | -                |
| Yes: via other means                                                                                                                                        | 32 (3.6%)     | 2 (1.1%)       | 29 (4.2%)    | 1 (5.0%)      | -                |
| Yes: still an in-patient at 30-days                                                                                                                         | 42 (4.7%)     | 16 (9.1%)      | 24 (3.5%)    | 2 (10.0%)     | -                |
| No: data is based on in-patient observations only                                                                                                           | 78 (8.8%)     | 11 (6.3%)      | 60 (8.7%)    | 7 (35.0%)     | -                |
| No: follow-up was done, but prior to 30-days                                                                                                                | 65 (7.3%)     | 26 (14.9%)     | 35 (5.1%)    | 4 (20.0%)     | -                |
| <b>If the patient had a complication, when was it diagnosed?</b>                                                                                            |               |                |              |               |                  |
| During the primary admission                                                                                                                                | 148 (14.9%)   | 22 (12.4%)     | 121 (15.4%)  | 5 (20.0%)     | 0.570            |
| As an emergency re-attender                                                                                                                                 | 12 (1.2%)     | 3 (1.7%)       | 8 (1.0%)     | 1 (4.0%)      | -                |
| At routine follow-up as an out-patient                                                                                                                      | 37 (3.7%)     | 5 (2.8%)       | 31 (3.9%)    | 1 (4.0%)      | -                |
| Not applicable, no complications                                                                                                                            | 787 (79.4%)   | 148 (83.1%)    | 622 (78.9%)  | 17 (68.0%)    | -                |
| Missing                                                                                                                                                     | 7 (0.7%)      | 0 (0.0%)       | 6 (0.8%)     | 1 (4.0%)      | -                |

\*Patients born in hospital = 0. Percentages have been rounded to 1 decimal place and may not total 100.0%. ARM: Anorectal malformation. HIC: High-income countries. IQR: Interquartile range. LIC: Low-income countries. MIC: Middle-income countries.

**Supplementary Table 7: Characteristics, perioperative care, surgical interventions, and outcomes for patients with Hirschsprung's disease**

| Variable                                                                                | Total (n=517) | HIC (n=107)  | MIC (n=393)  | LIC (n=17)  | P value |
|-----------------------------------------------------------------------------------------|---------------|--------------|--------------|-------------|---------|
| <b>Patient Characteristics:</b>                                                         |               |              |              |             |         |
| Median gestational age at birth (IQR), weeks                                            | 38 (2)        | 39 (2)       | 38 (2)       | 39 (4)      | <0.001  |
| Median age at presentation (IQR), hours                                                 | 216 (1,740)   | 100 (466)    | 336 (2118)   | 291 (2784)  | <0.001  |
| Sex:                                                                                    |               |              |              |             |         |
| Male                                                                                    | 399 (77.2%)   | 81 (75.7%)   | 309 (78.6%)  | 9 (52.9%)   | 0.044   |
| Female                                                                                  | 118 (22.8%)   | 26 (24.3%)   | 84 (21.4%)   | 8 (47.1%)   |         |
| Median weight at presentation (IQR), kg                                                 | 3.5 (2.1)     | 3.5 (0.9)    | 3.5 (2.6)    | 3.7 (3.8)   | 0.999   |
| Does the patient have another anomaly in addition to the study condition?               |               |              |              |             |         |
| Yes: Cardiovascular                                                                     | 44 (8.5%)     | 13 (12.1%)   | 31 (7.9%)    | 0 (0.0%)    | 0.166   |
| Yes: Respiratory                                                                        | 7 (1.4%)      | 1 (0.9%)     | 6 (1.5%)     | 0 (0.0%)    | 0.794   |
| Yes: Gastrointestinal                                                                   | 19 (3.7%)     | 7 (6.5%)     | 12 (3.1%)    | 0 (0.0%)    | 0.168   |
| Yes: Neurological                                                                       | 8 (1.5%)      | 4 (3.7%)     | 4 (1.0%)     | 0 (0.0%)    | 0.113   |
| Yes: Genito-urinary                                                                     | 12 (2.3%)     | 4 (3.7%)     | 8 (2.0%)     | 0 (0.0%)    | 0.474   |
| Yes: Musculoskeletal                                                                    | 7 (1.4%)      | 4 (3.7%)     | 3 (0.8%)     | 0 (0.0%)    | 0.055   |
| Yes: Down syndrome                                                                      | 23 (4.4%)     | 9 (8.4%)     | 14 (3.6%)    | 0 (0.0%)    | 0.065   |
| Yes: Beckwith Wiedemann syndrome                                                        | 1 (0.2%)      | 0 (0.0%)     | 1 (0.3%)     | 0 (0.0%)    | 0.854   |
| Yes: Cystic fibrosis                                                                    | 3 (0.6%)      | 0 (0.0%)     | 3 (0.8%)     | 0 (0.0%)    | 0.621   |
| Yes: Chromosomal                                                                        | 11 (2.1%)     | 5 (4.7%)     | 6 (1.5%)     | 0 (0.0%)    | 0.112   |
| Yes: Other                                                                              | 17 (3.3%)     | 5 (4.7%)     | 12 (3.1%)    | 0 (0.0%)    | 0.524   |
| No                                                                                      | 409 (79.1%)   | 77 (72.0%)   | 315 (80.2%)  | 17 (100.0%) | 0.018   |
| Median distance from patient's home to hospital (IQR), km*                              | 50 (112)      | 39 (87)      | 51 (125)     | 17 (74)     | 0.193   |
| Type of delivery:                                                                       |               |              |              |             |         |
| Vaginal (spontaneous)                                                                   | 267 (51.6%)   | 56 (52.3%)   | 202 (51.4%)  | 9 (52.9%)   | 0.002   |
| Vaginal (induced)                                                                       | 35 (6.8%)     | 12 (11.2%)   | 19 (4.8%)    | 4 (23.5%)   | -       |
| Caesarean section (elective)                                                            | 146 (28.2%)   | 22 (20.6%)   | 124 (31.6%)  | 0 (0.0%)    | -       |
| Caesarean section (urgent/non-elective)                                                 | 57 (11.0%)    | 14 (13.1%)   | 41 (10.4%)   | 2 (11.8%)   | -       |
| Unknown                                                                                 | 10 (1.9%)     | 3 (2.8%)     | 6 (1.5%)     | 1 (5.9%)    | -       |
| Missing                                                                                 | 2 (0.4%)      | 0 (0.0%)     | 1 (0.3%)     | 1 (5.9%)    | -       |
| Was the patient septic on arrival to your hospital?                                     |               |              |              |             |         |
| Yes                                                                                     | 132 (25.5%)   | 14 (13.1%)   | 115 (29.3%)  | 3 (17.6%)   | 0.002   |
| No                                                                                      | 385 (74.5%)   | 93 (86.9%)   | 278 (70.7%)  | 14 (82.4%)  | -       |
| Was the patient hypovolaemic on arrival to your hospital?                               |               |              |              |             |         |
| Yes                                                                                     | 98 (19.0%)    | 12 (11.2%)   | 85 (21.6%)   | 1 (5.9%)    | 0.022   |
| No                                                                                      | 418 (80.9%)   | 95 (88.8%)   | 308 (78.4%)  | 15 (88.2%)  | -       |
| Missing                                                                                 | 1 (0.2%)      | 0 (0.0%)     | 0 (0.0%)     | 1 (5.9%)    | -       |
| Was the patient hypothermic on arrival to your hospital?                                |               |              |              |             |         |
| Yes                                                                                     | 40 (7.7%)     | 1 (0.9%)     | 39 (9.9%)    | 0 (0.0%)    | 0.004   |
| No                                                                                      | 476 (92.1%)   | 106 (99.1%)  | 354 (90.1%)  | 16 (94.1%)  | -       |
| Missing                                                                                 | 1 (0.2%)      | 0 (0.0%)     | 0 (0.0%)     | 1 (5.9%)    | -       |
| American Society of Anaesthesiologists (ASA) Score at the time of primary intervention: |               |              |              |             |         |
| 1. Healthy person                                                                       | 113 (21.9%)   | 15 (14.0%)   | 90 (22.9%)   | 8 (47.1%)   | 0.007   |
| 2. Mild systemic disease                                                                | 154 (29.8%)   | 42 (39.3%)   | 111 (28.2%)  | 1 (5.9%)    | -       |
| 3. Severe systemic disease                                                              | 122 (23.6%)   | 32 (29.9%)   | 87 (22.1%)   | 3 (17.6%)   | -       |
| 4. Severe systemic disease that is a constant threat to life                            | 20 (3.9%)     | 1 (0.9%)     | 19 (4.8%)    | 0 (0.0%)    | -       |
| 5. A moribund patient who is not expected to survive without the operation              | 10 (1.9%)     | 2 (1.9%)     | 8 (2.0%)     | 0 (0.0%)    | -       |
| Not applicable - no intervention                                                        | 98 (19.0%)    | 15 (14.0%)   | 78 (19.8%)   | 5 (29.4%)   | -       |
| What study condition does the patient have?                                             |               |              |              |             |         |
| Oesophageal atresia                                                                     | 0 (0.0%)      | 0 (0.0%)     | 0 (0.0%)     | 0 (0.0%)    | -       |
| Congenital diaphragmatic hernia                                                         | 1 (0.2%)      | 0 (0.0%)     | 1 (0.3%)     | 0 (0.0%)    | 0.854   |
| Intestinal atresia                                                                      | 3 (0.6%)      | 2 (1.9%)     | 1 (0.3%)     | 0 (0.0%)    | 0.142   |
| Gastroschisis                                                                           | 1 (0.2%)      | 0 (0.0%)     | 1 (0.3%)     | 0 (0.0%)    | 0.854   |
| Exomphalos/Omphalocele                                                                  | 0 (0.0%)      | 0 (0.0%)     | 0 (0.0%)     | 0 (0.0%)    | -       |
| Anorectal malformation                                                                  | 0 (0.0%)      | 0 (0.0%)     | 0 (0.0%)     | 0 (0.0%)    | -       |
| Hirschsprung's Disease                                                                  | 517 (100.0%)  | 107 (100.0%) | 393 (100.0%) | 17 (100.0%) | -       |
| Time to first passage of meconium after birth                                           |               |              |              |             |         |
| Less than 24 hours                                                                      | 80 (15.5%)    | 20 (18.7%)   | 58 (14.8%)   | 2 (11.8%)   | 0.280   |
| 24-48 hours                                                                             | 148 (28.6%)   | 27 (25.2%)   | 118 (30.0%)  | 3 (17.6%)   | -       |
| Over 48 hours                                                                           | 187 (36.2%)   | 38 (35.5%)   | 145 (36.9%)  | 4 (23.5%)   | -       |
| Unknown                                                                                 | 88 (17.0%)    | 20 (18.7%)   | 62 (15.8%)   | 6 (35.3%)   | -       |
| Missing                                                                                 | 14 (2.7%)     | 2 (1.9%)     | 10 (2.5%)    | 2 (11.8%)   | -       |
| Features at presentation?                                                               |               |              |              |             |         |
| Abdominal distension                                                                    | 460 (89.0%)   | 96 (89.7%)   | 350 (89.1%)  | 14 (82.4%)  | 0.663   |
| Bilious vomiting                                                                        | 190 (36.8%)   | 51 (47.7%)   | 135 (34.4%)  | 4 (23.5%)   | 0.021   |
| Non-bilious vomiting                                                                    | 103 (19.9%)   | 22 (20.6%)   | 79 (20.1%)   | 2 (11.8%)   | 0.689   |
| Poor feeding                                                                            | 189 (36.6%)   | 50 (46.7%)   | 138 (35.1%)  | 1 (5.9%)    | 0.002   |

|                                                                                                          |             |            |             |            |        |
|----------------------------------------------------------------------------------------------------------|-------------|------------|-------------|------------|--------|
| Suspected enterocolitis                                                                                  | 96 (18.6%)  | 17 (15.9%) | 74 (18.8%)  | 5 (29.4%)  | 0.397  |
| Perforation                                                                                              | 20 (3.9%)   | 2 (1.9%)   | 18 (4.6%)   | 0 (0.0%)   | 0.306  |
| Other                                                                                                    | 56 (10.8%)  | 9 (8.4%)   | 43 (10.9%)  | 4 (23.5%)  | 0.174  |
| Source of diagnosis of Hirschsprung's disease?                                                           |             |            |             |            |        |
| Genetic                                                                                                  | 1 (0.2%)    | 1 (0.9%)   | 0 (0.0%)    | 0 (0.0%)   | 0.147  |
| Mucosal biopsy                                                                                           | 173 (33.5%) | 74 (69.2%) | 98 (24.9%)  | 1 (5.9%)   | <0.001 |
| Full thickness biopsy                                                                                    | 175 (33.8%) | 27 (25.2%) | 148 (37.7%) | 0 (0.0%)   | 0.001  |
| Anorectal manometry                                                                                      | 23 (4.4%)   | 3 (2.8%)   | 20 (5.1%)   | 0 (0.0%)   | 0.396  |
| Barium enema                                                                                             | 190 (36.8%) | 28 (26.2%) | 160 (40.7%) | 2 (11.8%)  | 0.002  |
| Not confirmed: suspected only                                                                            | 83 (16.1%)  | 5 (4.7%)   | 65 (16.5%)  | 13 (76.5%) | <0.001 |
| Other                                                                                                    | 7 (1.4%)    | 1 (0.9%)   | 5 (1.3%)    | 1 (5.9%)   | 0.250  |
| If on biopsy, what was the method of histology staining?                                                 |             |            |             |            |        |
| Hematoxylin and Eosin (H&E)                                                                              | 281 (80.7%) | 62 (61.4%) | 218 (88.6%) | 1 (100.0%) | <0.001 |
| Acetylcholinesterase                                                                                     | 71 (20.4%)  | 53 (52.5%) | 18 (7.3%)   | 0 (0.0%)   | <0.001 |
| Calretinin                                                                                               | 104 (29.9%) | 62 (61.4%) | 42 (17.1%)  | 0 (0.0%)   | <0.001 |
| NADH-tetrazolium                                                                                         | 6 (1.7%)    | 6 (5.9%)   | 0 (0.0%)    | 0 (0.0%)   | <0.001 |
| Other                                                                                                    | 4 (1.1%)    | 3 (3.0%)   | 1 (0.4%)    | 0 (0.0%)   | 0.027  |
| Length of aganglionosis?                                                                                 |             |            |             |            |        |
| Rectal                                                                                                   | 117 (22.6%) | 21 (19.6%) | 94 (23.9%)  | 2 (11.8%)  | <0.001 |
| Sigmoid                                                                                                  | 179 (34.6%) | 35 (32.7%) | 143 (36.4%) | 1 (5.9%)   | -      |
| Descending colon                                                                                         | 45 (8.7%)   | 8 (7.5%)   | 37 (9.4%)   | 0 (0.0%)   | -      |
| Transverse colon                                                                                         | 16 (3.1%)   | 10 (9.3%)  | 6 (1.5%)    | 0 (0.0%)   | -      |
| Ascending colon                                                                                          | 14 (2.7%)   | 1 (0.9%)   | 13 (3.3%)   | 0 (0.0%)   | -      |
| Small bowel                                                                                              | 11 (2.1%)   | 2 (1.9%)   | 9 (2.3%)    | 0 (0.0%)   | -      |
| Unknown at present                                                                                       | 135 (26.1%) | 30 (28.0%) | 91 (23.2%)  | 14 (82.4%) | -      |
| <b>Care prior to presentation at the paediatric surgery centre:</b>                                      |             |            |             |            |        |
| Antenatal ultrasound undertaken?                                                                         |             |            |             |            |        |
| Yes: study condition diagnosed                                                                           | 5 (1.0%)    | 1 (0.9%)   | 4 (1.0%)    | 0 (0.0%)   | 0.046  |
| Yes: problem identified but study condition not diagnosed                                                | 33 (6.4%)   | 11 (10.3%) | 21 (5.3%)   | 1 (5.9%)   | -      |
| Yes: no problem identified                                                                               | 390 (75.4%) | 87 (81.3%) | 293 (74.6%) | 10 (58.8%) | -      |
| No                                                                                                       | 88 (17.0%)  | 8 (7.5%)   | 75 (19.1%)  | 5 (29.4%)  | -      |
| Missing                                                                                                  | 1 (0.2%)    | 0 (0.0%)   | 0 (0.0%)    | 1 (5.9%)   | -      |
| Median gestational age of study condition diagnosis if diagnosis was antenatal (IQR), weeks              | 28 (2)      | 28 (0)     | 27 (2)      | -          | 0.936  |
| Mode of transport to hospital:                                                                           |             |            |             |            |        |
| Ambulance                                                                                                | 139 (26.9%) | 52 (48.6%) | 80 (20.4%)  | 7 (41.2%)  | <0.001 |
| Other transport provided by the health service                                                           | 23 (4.4%)   | 14 (13.1%) | 9 (2.3%)    | 0 (0.0%)   | -      |
| Patient's own transport                                                                                  | 320 (61.9%) | 31 (29.0%) | 279 (71.0%) | 10 (58.8%) | -      |
| Born within the hospital                                                                                 | 34 (6.6%)   | 10 (9.3%)  | 24 (6.1%)   | 0 (0.0%)   | -      |
| Missing                                                                                                  | 1 (0.2%)    | 0 (0.0%)   | 1 (0.3%)    | 0 (0.0%)   | -      |
| If outborn, where did the patient present from?                                                          |             |            |             |            |        |
| Home                                                                                                     | 162 (33.6%) | 26 (26.8%) | 134 (36.4%) | 2 (11.8%)  | 0.006  |
| Community Clinic/General Practice                                                                        | 65 (13.5%)  | 5 (5.2%)   | 55 (14.9%)  | 5 (29.4%)  | -      |
| District Hospital                                                                                        | 243 (50.4%) | 64 (66.0%) | 170 (46.2%) | 9 (52.9%)  | -      |
| From another country                                                                                     | 3 (0.6%)    | 1 (1.0%)   | 2 (0.5%)    | 0 (0.0%)   | -      |
| Unknown                                                                                                  | 9 (1.9%)    | 1 (1.0%)   | 7 (1.9%)    | 1 (5.9%)   | -      |
| <b>Perioperative care at the paediatric surgery centre:</b>                                              |             |            |             |            |        |
| If septic, were appropriate antibiotics administered?                                                    |             |            |             |            |        |
| Yes within 1 hour of arrival                                                                             | 91 (68.9%)  | 12 (85.7%) | 78 (67.8%)  | 1 (33.3%)  | 0.390  |
| Yes: within the first day of arrival                                                                     | 38 (28.8%)  | 2 (14.3%)  | 34 (29.6%)  | 2 (66.7%)  | -      |
| No                                                                                                       | 3 (2.3%)    | 0 (0.0%)   | 3 (2.6%)    | 0 (0.0%)   | -      |
| If hypovolaemic, was an intravenous fluid bolus given?                                                   |             |            |             |            |        |
| Yes within 1 hour of arrival                                                                             | 69 (70.4%)  | 4 (33.3%)  | 64 (75.3%)  | 1 (100.0%) | <0.001 |
| Yes: within the first day of arrival                                                                     | 23 (23.5%)  | 3 (25.0%)  | 20 (23.5%)  | 0 (0.0%)   | -      |
| No                                                                                                       | 6 (6.1%)    | 5 (41.7%)  | 1 (1.2%)    | 0 (0.0%)   | -      |
| If hypovolaemic, how much intravenous fluid was given?                                                   |             |            |             |            |        |
| 10 - 20mls/kg                                                                                            | 71 (77.2%)  | 2 (28.6%)  | 68 (81.0%)  | 1 (100.0%) | 0.006  |
| Above 20mls/kg                                                                                           | 21 (22.8%)  | 5 (71.4%)  | 16 (19.0%)  | 0 (0.0%)   | -      |
| If hypothermic, was the patient warmed on arrival to your hospital to within a normal temperature range? |             |            |             |            |        |
| Yes                                                                                                      | 36 (90.0%)  | 1 (100.0%) | 35 (89.7%)  | -          | 0.770  |
| No                                                                                                       | 3 (7.5%)    | 0 (0.0%)   | 3 (7.7%)    | -          | -      |
| Missing                                                                                                  | 1 (2.5%)    | 0 (0.0%)   | 1 (2.6%)    | -          | -      |
| Did the patient receive central venous access?                                                           |             |            |             |            |        |
| Yes: umbilical catheter                                                                                  | 17 (3.3%)   | 3 (2.8%)   | 14 (3.6%)   | 0 (0.0%)   | 0.687  |
| Yes: peripherally inserted central catheter (PICC)                                                       | 81 (15.7%)  | 40 (37.4%) | 40 (10.2%)  | 1 (5.9%)   | <0.001 |
| Yes: percutaneously inserted central line with ultrasound guidance                                       | 28 (5.4%)   | 10 (9.3%)  | 18 (4.6%)   | 0 (0.0%)   | 0.094  |
| Yes: surgically placed central line (open insertion)                                                     | 12 (2.3%)   | 3 (2.8%)   | 9 (2.3%)    | 0 (0.0%)   | 0.773  |
| No                                                                                                       | 389 (75.2%) | 55 (51.4%) | 318 (80.9%) | 16 (94.1%) | <0.001 |
| Median total duration of antibiotics following primary intervention (IQR), days                          | 6 (7)       | 3 (5)      | 7 (6)       | 3 (6)      | <0.001 |
| Did the patient receive a blood transfusion?                                                             |             |            |             |            |        |
| Yes: not cross-matched                                                                                   | 7 (1.4%)    | 0 (0.0%)   | 7 (1.8%)    | 0 (0.0%)   | <0.001 |

|                                                                                                         |             |            |             |            |        |
|---------------------------------------------------------------------------------------------------------|-------------|------------|-------------|------------|--------|
| Yes: cross-matched.                                                                                     | 140 (27.1%) | 18 (16.8%) | 121 (30.8%) | 1 (5.9%)   | -      |
| No: not required.                                                                                       | 366 (70.8%) | 88 (82.2%) | 263 (66.9%) | 15 (88.2%) | -      |
| No: it was required but not available.                                                                  | 3 (0.6%)    | 0 (0.0%)   | 2 (0.5%)    | 1 (5.9%)   | -      |
| Missing                                                                                                 | 1 (0.2%)    | 1 (0.9%)   | 0 (0.0%)    | 0 (0.0%)   | -      |
| Did the patient require ventilation?                                                                    |             |            |             |            |        |
| Yes: and it was given                                                                                   | 82 (15.9%)  | 28 (26.2%) | 51 (13.0%)  | 3 (17.6%)  | <0.001 |
| Yes, but it was not available                                                                           | 2 (0.4%)    | 0 (0.0%)   | 1 (0.3%)    | 1 (5.9%)   | -      |
| No                                                                                                      | 433 (83.8%) | 79 (73.8%) | 341 (86.8%) | 13 (76.5%) | -      |
| Median time patient remained on ventilation if given (IQR), days                                        | 2 (3)       | 3 (4)      | 2 (3)       | 1 (1)      | 0.279  |
| Median time to first enteral feed (post-primary intervention) (IQR), days                               | 3 (3)       | 3 (4)      | 3 (3)       | 1 (0)      | 0.023  |
| Median time to full enteral feeds (post-primary intervention) (IQR), days                               | 4 (5)       | 5 (7)      | 4 (4)       | 3 (16)     | 0.046  |
| Did the patient require parenteral nutrition?                                                           |             |            |             |            |        |
| Yes: and it was given                                                                                   | 167 (32.3%) | 50 (46.7%) | 117 (29.8%) | 0 (0.0%)   | <0.001 |
| Yes: and it was sometimes available, but less than required                                             | 38 (7.4%)   | 0 (0.0%)   | 38 (9.7%)   | 0 (0.0%)   | -      |
| Yes: but it was not available                                                                           | 8 (1.5%)    | 0 (0.0%)   | 7 (1.8%)    | 1 (5.9%)   | -      |
| No                                                                                                      | 303 (58.6%) | 56 (52.3%) | 231 (58.8%) | 16 (94.1%) | -      |
| Missing                                                                                                 | 1 (0.2%)    | 1 (0.9%)   | 0 (0.0%)    | 0 (0.0%)   | -      |
| Median time patient received parenteral nutrition if received (IQR), days                               | 6 (7.0)     | 7 (13.0)   | 5 (6.0)     | -          | 0.015  |
| <b>Surgical intervention:</b>                                                                           |             |            |             |            |        |
| Median time from arrival at your hospital to primary intervention (IQR), hours                          | 45 (115)    | 29 (164)   | 48 (115)    | 16 (37)    | 0.186  |
| Primary intervention:                                                                                   |             |            |             |            |        |
| Conservative: regular rectal washouts/ enemas                                                           | 144 (27.9%) | 29 (27.1%) | 113 (28.8%) | 2 (11.8%)  | 0.001  |
| Primary stoma (with or without pre-operative washouts or enemas prior to planned stoma placement)       | 142 (27.5%) | 32 (29.9%) | 105 (26.7%) | 5 (29.4%)  | -      |
| Primary pull-through (Soave)                                                                            | 62 (12.0%)  | 13 (12.1%) | 49 (12.5%)  | 0 (0.0%)   | -      |
| Failed conservative management followed by a stoma during the same hospital admission.                  | 54 (10.4%)  | 7 (6.5%)   | 47 (12.0%)  | 0 (0.0%)   | -      |
| Primary pull-through (Swenson)                                                                          | 24 (4.6%)   | 9 (8.4%)   | 15 (3.8%)   | 0 (0.0%)   | -      |
| Conservative: including digital stimulation and laxatives                                               | 22 (4.3%)   | 2 (1.9%)   | 16 (4.1%)   | 4 (23.5%)  | -      |
| Primary pull-through (Other)                                                                            | 22 (4.3%)   | 4 (3.7%)   | 17 (4.3%)   | 1 (5.9%)   | -      |
| Conservative: no treatment                                                                              | 21 (4.1%)   | 7 (6.5%)   | 11 (2.8%)   | 3 (17.6%)  | -      |
| Transanal posterior anorectal myectomy                                                                  | 7 (1.4%)    | 0 (0.0%)   | 7 (1.8%)    | 0 (0.0%)   | -      |
| Palliative care                                                                                         | 2 (0.4%)    | 0 (0.0%)   | 2 (0.5%)    | 0 (0.0%)   | -      |
| Primary pull-through (Duhamel)                                                                          | 1 (0.2%)    | 0 (0.0%)   | 1 (0.3%)    | 0 (0.0%)   | -      |
| Other                                                                                                   | 16 (3.1%)   | 4 (3.7%)   | 10 (2.5%)   | 2 (11.8%)  | -      |
| Was it laparoscopic assisted?                                                                           |             |            |             |            |        |
| Yes                                                                                                     | 55 (50.5%)  | 21 (80.8%) | 34 (41.5%)  | 0 (0.0%)   | 0.001  |
| No                                                                                                      | 54 (49.5%)  | 5 (19.2%)  | 48 (58.5%)  | 1 (100%)   | -      |
| If primary pull-through was undertaken, did the patient have a covering stoma?                          |             |            |             |            |        |
| Yes                                                                                                     | 3 (2.8%)    | 2 (7.7%)   | 1 (1.2%)    | 0 (0.0%)   | 0.210  |
| No                                                                                                      | 106 (97.2%) | 24 (92.3%) | 81 (98.8%)  | 1 (100.0%) | -      |
| What type of anaesthesia was used for the primary intervention?                                         |             |            |             |            |        |
| General anaesthesia with endotracheal tube                                                              | 321 (62.1%) | 67 (62.6%) | 247 (62.8%) | 7 (41.2%)  | 0.009  |
| General anaesthesia with laryngeal airway                                                               | 10 (1.9%)   | 3 (2.8%)   | 7 (1.8%)    | 0 (0.0%)   | -      |
| Ketamine anaesthesia                                                                                    | 3 (0.6%)    | 0 (0.0%)   | 2 (0.5%)    | 1 (5.9%)   | -      |
| Spinal/caudal anaesthesia                                                                               | 0 (0.0%)    | 0 (0.0%)   | 0 (0.0%)    | 0 (0.0%)   | -      |
| Local anaesthesia only                                                                                  | 0 (0.0%)    | 0 (0.0%)   | 0 (0.0%)    | 0 (0.0%)   | -      |
| No anaesthesia, just analgesia                                                                          | 11 (2.1%)   | 6 (5.6%)   | 5 (1.3%)    | 0 (0.0%)   | -      |
| No anaesthesia, no analgesia                                                                            | 86 (16.6%)  | 14 (13.1%) | 69 (17.6%)  | 3 (17.6%)  | -      |
| Not applicable: no surgery or primary intervention undertaken.                                          | 86 (16.6%)  | 17 (15.9%) | 63 (16.0%)  | 6 (35.3%)  | -      |
| Who undertook the anaesthetic for the primary intervention?                                             |             |            |             |            |        |
| Anaesthetic doctor                                                                                      | 330 (63.8%) | 70 (65.4%) | 253 (64.4%) | 7 (41.2%)  | 0.130  |
| Anaesthetic nurse                                                                                       | 4 (0.8%)    | 0 (0.0%)   | 3 (0.8%)    | 1 (5.9%)   | -      |
| Medical officer                                                                                         | 1 (0.2%)    | 0 (0.0%)   | 1 (0.3%)    | 0 (0.0%)   | -      |
| Surgeon                                                                                                 | 1 (0.2%)    | 1 (0.9%)   | 0 (0.0%)    | 0 (0.0%)   | -      |
| Other healthcare professional                                                                           | 2 (0.4%)    | 1 (0.9%)   | 1 (0.3%)    | 0 (0.0%)   | -      |
| No anaesthetic undertaken                                                                               | 179 (34.6%) | 35 (32.7%) | 135 (34.4%) | 9 (52.9%)  | -      |
| Who undertook the primary intervention?                                                                 |             |            |             |            |        |
| Paediatric surgeon (or junior with paediatric surgeon assisting/in the room)                            | 394 (76.2%) | 86 (80.4%) | 300 (76.3%) | 8 (47.1%)  | 0.007  |
| General surgeon (or junior with general surgeon assisting/in the room)                                  | 5 (1.0%)    | 2 (1.9%)   | 2 (0.5%)    | 1 (5.9%)   | -      |
| Junior doctor, medical officer or other (without a paediatric or general surgeon assisting/in the room) | 37 (7.2%)   | 4 (3.7%)   | 32 (8.1%)   | 1 (5.9%)   | -      |
| Trainee surgeon (without a paediatric or general surgeon assisting or in the room)                      | 11 (2.1%)   | 3 (2.8%)   | 8 (2.0%)    | 0 (0.0%)   | -      |
| Not applicable - no surgery or primary intervention undertaken.                                         | 70 (13.5%)  | 12 (11.2%) | 51 (13.0%)  | 7 (41.2%)  | -      |
| Was a Surgical Safety Checklist used at the time of primary intervention?                               |             |            |             |            |        |
| Yes                                                                                                     | 239 (46.2%) | 71 (66.4%) | 162 (41.2%) | 6 (35.3%)  | <0.001 |
| No: but it was available                                                                                | 65 (12.6%)  | 1 (0.9%)   | 63 (16.0%)  | 1 (5.9%)   | -      |
| No: it was not available                                                                                | 42 (8.1%)   | 1 (0.9%)   | 40 (10.2%)  | 1 (5.9%)   | -      |
| Not applicable: a conservative primary intervention was undertaken                                      | 102 (19.7%) | 24 (22.4%) | 75 (19.1%)  | 3 (17.6%)  | -      |
| Not applicable: no surgery or primary intervention undertaken                                           | 69 (13.3%)  | 10 (9.3%)  | 53 (13.5%)  | 6 (35.3%)  | -      |
| What is the plan for future management?                                                                 |             |            |             |            |        |

|                                                                                                                  |             |             |             |            |                  |
|------------------------------------------------------------------------------------------------------------------|-------------|-------------|-------------|------------|------------------|
| No further surgery planned                                                                                       | 37 (7.2%)   | 5 (4.7%)    | 31 (7.9%)   | 1 (5.9%)   | 0.509            |
| Anorectal pull-through at your hospital                                                                          | 299 (57.8%) | 67 (62.6%)  | 224 (57.0%) | 8 (47.1%)  | 0.382            |
| Anorectal pull-through at a different hospital                                                                   | 8 (1.5%)    | 2 (1.9%)    | 5 (1.3%)    | 1 (5.9%)   | 0.307            |
| Stoma closure                                                                                                    | 32 (6.2%)   | 7 (6.5%)    | 23 (5.9%)   | 2 (11.8%)  | 0.604            |
| Other                                                                                                            | 27 (5.2%)   | 2 (1.9%)    | 23 (5.9%)   | 2 (11.8%)  | 0.121            |
| Unknown                                                                                                          | 24 (4.6%)   | 7 (6.5%)    | 14 (3.6%)   | 3 (17.6%)  | <b>0.015</b>     |
| <b>Outcomes:</b>                                                                                                 |             |             |             |            |                  |
| Did the patient survive to discharge (or 30-days if still an in-patient 30-days following primary intervention)? |             |             |             |            |                  |
| Yes                                                                                                              | 487 (94.2%) | 105 (98.1%) | 367 (93.4%) | 15 (88.2%) | 0.100            |
| No                                                                                                               | 30 (5.8%)   | 2 (1.9%)    | 26 (6.6%)   | 2 (11.8%)  | -                |
| If the patient was discharged prior, were they still alive at 30-days following primary intervention?            |             |             |             |            |                  |
| Yes                                                                                                              | 444 (91.2%) | 100 (95.2%) | 331 (90.2%) | 13 (86.7%) | 0.140            |
| No                                                                                                               | 1 (0.2%)    | 0 (0.0%)    | 1 (0.3%)    | 0 (0.0%)   | -                |
| Not followed-up after discharge                                                                                  | 24 (4.9%)   | 0 (0.0%)    | 22 (6.0%)   | 2 (13.3%)  | -                |
| Followed-up, but not until 30-days post primary intervention                                                     | 18 (3.7%)   | 5 (4.8%)    | 13 (3.5%)   | 0 (0.0%)   | -                |
| Cause of mortality:                                                                                              |             |             |             |            |                  |
| Sepsis                                                                                                           | 10 (32.3%)  | 2 (100.0%)  | 7 (25.9%)   | 1 (50.0%)  | 0.870            |
| Enterocolitis                                                                                                    | 7 (22.6%)   | 0 (0.0%)    | 7 (25.9%)   | 0 (0.0%)   | -                |
| Respiratory failure                                                                                              | 4 (12.9%)   | 0 (0.0%)    | 4 (14.8%)   | 0 (0.0%)   | -                |
| Electrolyte disturbance                                                                                          | 4 (12.9%)   | 0 (0.0%)    | 3 (11.1%)   | 1 (50.0%)  | -                |
| Malnutrition                                                                                                     | 3 (9.7%)    | 0 (0.0%)    | 3 (11.1%)   | 0 (0.0%)   | -                |
| Aspiration pneumonia                                                                                             | 1 (3.2%)    | 0 (0.0%)    | 1 (3.7%)    | 0 (0.0%)   | -                |
| Cardiac failure                                                                                                  | 1 (3.2%)    | 0 (0.0%)    | 1 (3.7%)    | 0 (0.0%)   | -                |
| Ischaemic bowel                                                                                                  | 1 (3.2%)    | 0 (0.0%)    | 1 (3.7%)    | 0 (0.0%)   | -                |
| Median duration of hospital stays, (IQR) days                                                                    | 11 (10)     | 13 (12)     | 10 (9)      | 5 (7)      | <b>0.001</b>     |
| Did the patient have a surgical site infection?                                                                  |             |             |             |            |                  |
| Yes                                                                                                              | 29 (5.6%)   | 5 (4.7%)    | 24 (6.1%)   | 0 (0.0%)   | 0.840            |
| No                                                                                                               | 324 (62.7%) | 68 (63.6%)  | 245 (62.3%) | 11 (64.7%) | -                |
| Not applicable, no surgical wound                                                                                | 164 (31.7%) | 34 (31.8%)  | 124 (31.6%) | 6 (35.3%)  | -                |
| Did the patient have a full thickness wound dehiscence?                                                          |             |             |             |            |                  |
| Yes                                                                                                              | 12 (2.3%)   | 0 (0.0%)    | 12 (3.1%)   | 0 (0.0%)   | 0.340            |
| No                                                                                                               | 343 (66.3%) | 76 (71.0%)  | 256 (65.1%) | 11 (64.7%) | -                |
| Not applicable, no surgical wound                                                                                | 162 (31.3%) | 31 (29.0%)  | 125 (31.8%) | 6 (35.3%)  | -                |
| Did the patient require a further unplanned intervention?                                                        |             |             |             |            |                  |
| Yes – percutaneous                                                                                               | 5 (1.0%)    | 4 (3.7%)    | 1 (0.3%)    | 0 (0.0%)   | <b>0.029</b>     |
| Yes – surgical intervention                                                                                      | 64 (12.4%)  | 13 (12.1%)  | 50 (12.7%)  | 1 (5.9%)   | -                |
| No                                                                                                               | 387 (74.9%) | 76 (71.0%)  | 299 (76.1%) | 12 (70.6%) | -                |
| Not applicable – no primary intervention undertaken                                                              | 61 (11.8%)  | 14 (13.1%)  | 43 (10.9%)  | 4 (23.5%)  | -                |
| If central line access used, did the patient acquire central line sepsis?                                        |             |             |             |            |                  |
| Yes, diagnosed clinically                                                                                        | 3 (2.3%)    | 0 (0.0%)    | 3 (3.9%)    | 0 (0.0%)   | 0.670            |
| Yes, confirmed on microbiology                                                                                   | 6 (4.6%)    | 3 (5.8%)    | 3 (3.9%)    | 0 (0.0%)   | -                |
| No                                                                                                               | 121 (93.1%) | 49 (94.2%)  | 71 (92.2%)  | 1 (100.0%) | -                |
| Did the patient have any condition specific complications within 30-days of primary intervention?                |             |             |             |            |                  |
| Hirschsprung's associated enterocolitis (HAEC)                                                                   | 69 (13.3%)  | 13 (12.1%)  | 55 (14.0%)  | 1 (5.9%)   | 0.579            |
| Electrolyte disturbance                                                                                          | 47 (9.1%)   | 3 (2.8%)    | 41 (10.4%)  | 3 (17.6%)  | <b>0.024</b>     |
| Peri-stoma skin breakdown (or perianal if primary pull-through was undertaken without a covering stoma)          | 17 (3.3%)   | 2 (1.9%)    | 15 (3.8%)   | 0 (0.0%)   | 0.449            |
| High stoma output (over 20mls/kg/day)                                                                            | 15 (2.9%)   | 6 (5.6%)    | 9 (2.3%)    | 0 (0.0%)   | 0.149            |
| Stoma prolapse/ retraction/ herniation                                                                           | 14 (2.7%)   | 4 (3.7%)    | 9 (2.3%)    | 1 (5.9%)   | 0.511            |
| Post-operative obstruction                                                                                       | 14 (2.7%)   | 5 (4.7%)    | 9 (2.3%)    | 0 (0.0%)   | 0.316            |
| Anastomotic leak (if primary pull-through was undertaken without a covering stoma)                               | 3 (0.6%)    | 1 (0.9%)    | 2 (0.5%)    | 0 (0.0%)   | 0.832            |
| Anal stenosis                                                                                                    | 2 (0.4%)    | 1 (0.9%)    | 1 (0.3%)    | 0 (0.0%)   | 0.583            |
| Other                                                                                                            | 118 (22.8%) | 8 (7.5%)    | 102 (26.0%) | 8 (47.1%)  | <b>&lt;0.001</b> |
| Was the patient followed up at 30-days post primary surgery or intervention to assess for complications?         |             |             |             |            |                  |
| Yes: reviewed in person                                                                                          | 307 (63.0%) | 69 (65.7%)  | 234 (63.8%) | 4 (26.7%)  | <b>&lt;0.001</b> |
| Yes: via telephone consultation                                                                                  | 58 (11.9%)  | 4 (3.8%)    | 52 (14.2%)  | 2 (13.3%)  | -                |
| Yes: via other means                                                                                             | 14 (2.9%)   | 3 (2.9%)    | 10 (2.7%)   | 1 (6.7%)   | -                |
| Yes: still an in-patient at 30-days                                                                              | 22 (4.5%)   | 11 (10.5%)  | 10 (2.7%)   | 1 (6.7%)   | -                |
| No: data is based on in-patient observations only                                                                | 51 (10.5%)  | 10 (9.5%)   | 35 (9.5%)   | 6 (40.0%)  | -                |
| No: follow-up was done, but prior to 30-days                                                                     | 35 (7.2%)   | 8 (7.6%)    | 26 (7.1%)   | 1 (6.7%)   | -                |
| If the patient had a complication, when was it diagnosed?                                                        |             |             |             |            |                  |
| During the primary admission                                                                                     | 62 (12.0%)  | 17 (15.9%)  | 45 (11.5%)  | 0 (0.0%)   | <b>0.018</b>     |
| As an emergency re-attender                                                                                      | 27 (5.2%)   | 7 (6.5%)    | 17 (4.3%)   | 3 (17.6%)  | -                |
| At routine follow-up as an out-patient                                                                           | 25 (4.8%)   | 1 (0.9%)    | 24 (6.1%)   | 0 (0.0%)   | -                |
| Not applicable, no complications                                                                                 | 400 (77.4%) | 82 (76.6%)  | 305 (77.6%) | 13 (76.5%) | -                |
| Missing                                                                                                          | 3 (0.6%)    | 0 (0.0%)    | 2 (0.5%)    | 1 (5.9%)   | -                |

\*Patients born in hospital = 0. Percentages have been rounded to 1 decimal place and may not total 100.0%. HIC: High-income countries. IQR: Interquartile range. LIC: Low-income countries. MIC: Middle-income countries.

**Supplementary Table 8: Patient follow-up**

| Variable                                                                                                                     | Total<br>n, % (95% CI)          | HIC<br>n, % (95% CI)           | MIC<br>n, % (95% CI)            | LIC<br>n, % (95% CI)          | P<br>value*      |
|------------------------------------------------------------------------------------------------------------------------------|---------------------------------|--------------------------------|---------------------------------|-------------------------------|------------------|
| <b>If the patient was discharged prior, were they still alive at 30-days post-intervention?†</b>                             | <b>n=2761</b>                   | <b>n=651</b>                   | <b>n=2057</b>                   | <b>n=53</b>                   |                  |
| Yes                                                                                                                          | 2486, <b>90.3%</b> (89.1, 91.3) | 606, <b>93.4%</b> (91.2, 95.1) | 1848, <b>90.0%</b> (88.7, 91.2) | 32, <b>60.3%</b> (46.4, 72.8) | <b>&lt;0.001</b> |
| No                                                                                                                           | 9, <b>0.3%</b> (0.2, 0.6)       | 0, <b>0.0%</b>                 | 9, <b>0.4%</b> (0.2, 0.8)       | 0, <b>0.0%</b>                |                  |
| Not followed-up after discharge                                                                                              | 135, <b>4.9%</b> (4.2, 5.8)     | 13, <b>2.0%</b> (1.2%, 3.4%)   | 102, <b>5.0%</b> (4.1, 6.0)     | 20, <b>37.7%</b> (25.6, 51.7) |                  |
| Followed-up, but not until 30-days post primary intervention                                                                 | 124, <b>4.5%</b> (3.8, 5.3)     | 30, <b>4.6%</b> (3.2%, 6.5%)   | 93, <b>4.5%</b> (3.7, 5.5)      | 1, <b>1.9%</b> (0.3, 12.7)    |                  |
| Missing                                                                                                                      | 7                               | 2                              | 5                               | 0                             |                  |
| <b>If the patient survived to discharge, were they followed-up to 30-days post-intervention to assess for complications?</b> | <b>n=3179</b>                   | <b>n=846</b>                   | <b>n=2277</b>                   | <b>n=56</b>                   |                  |
| Yes: reviewed in person                                                                                                      | 1829, <b>57.8%</b> (56.0, 59.5) | 467, <b>55.3%</b> (52.0, 58.7) | 1350, <b>59.6%</b> (57.5, 61.6) | 12, <b>21.4%</b> (12.4, 34.4) | <b>0.001</b>     |
| Yes: via telephone consultation                                                                                              | 341, <b>10.8%</b> (9.7, 11.8)   | 32, <b>3.8%</b> (2.5, 5.1)     | 304, <b>13.4%</b> (12.0, 14.8)  | 5, <b>8.9%</b> (3.7, 20.0)    |                  |
| Yes: via other means                                                                                                         | 90, <b>2.8%</b> (2.3, 3.4)      | 15, <b>1.8%</b> (0.9, 2.7)     | 73, <b>3.2%</b> (2.5, 3.9)      | 2, <b>3.6%</b> (0.9, 13.6)    |                  |
| Yes: still an in-patient at 30-days                                                                                          | 418, <b>13.2%</b> (12.1, 14.4)  | 195, <b>23.1%</b> (20.3, 26.0) | 220, <b>9.7%</b> (8.5, 10.9)    | 3, <b>5.4%</b> (1.7, 15.7)    |                  |
| No: data is based on in-patient observations only                                                                            | 303, <b>9.6%</b> (8.5, 10.6)    | 74, <b>8.8%</b> (6.9, 10.7)    | 205, <b>9.0%</b> (7.9, 10.2)    | 24, <b>42.9%</b> (30.4, 56.3) |                  |
| No: follow-up was done, but prior to 30-days                                                                                 | 186, <b>5.9%</b> (5.1, 6.7)     | 61, <b>7.2%</b> (5.5, 9.0)     | 115, <b>5.1%</b> (4.2, 6.0)     | 10, <b>17.9%</b> (9.8, 30.4)  |                  |
| Missing                                                                                                                      | 12                              | 2                              | 10                              | 0                             |                  |
| <b>If the patient had a complication, when was it diagnosed?</b>                                                             | <b>n=3849</b>                   | <b>n=896</b>                   | <b>n=2860</b>                   | <b>n=93</b>                   |                  |
| During the primary admission                                                                                                 | 901, <b>23.5%</b> (22.2, 24.9)  | 203, <b>22.7%</b> (20.0, 25.5) | 678, <b>23.8%</b> (22.3, 25.4)  | 20, <b>22.0%</b> (14.5, 31.8) | 0.277            |
| As an emergency re-attender                                                                                                  | 91, <b>2.4%</b> (1.9, 2.9)      | 22, <b>2.5%</b> (1.6, 3.7)     | 63, <b>2.2%</b> (1.7, 2.8)      | 6, <b>6.6%</b> (2.9, 14.1)    |                  |
| At routine follow-up as an out-patient                                                                                       | 101, <b>2.6%</b> (2.2, 3.2)     | 9, <b>1.0%</b> (0.5, 1.9)      | 90, <b>3.2%</b> (2.6, 3.9)      | 2, <b>2.2%</b> (0.5, 8.6)     |                  |
| Not applicable, no complications                                                                                             | 2738, <b>71.5%</b> (70.0, 72.9) | 662, <b>73.9%</b> (70.9, 76.7) | 2013, <b>70.8%</b> (69.1, 72.4) | 63, <b>69.2%</b> (58.8, 78.0) |                  |
| Missing                                                                                                                      | 18                              | 0                              | 16                              | 2                             |                  |

\*Calculated using Chi-squared analysis and Fisher's exact as appropriate. †Includes those who survived to discharge (n=3179) minus those still an in-patient at 30-days (n=418). CI: Confidence interval. HIC: High-income countries. LIC: Low-income countries. MIC: Middle-income countries.

**Supplementary Table 9: All-cause in hospital mortality rates for all patients and by condition**

|                                 |     | N    | Died | %     | Lower CI* | Upper CI* | LIC p value† | MIC p value† | LIC, RR (95% CI)        | MIC RR (95% CI)       | HIC RR (95% CI)     |
|---------------------------------|-----|------|------|-------|-----------|-----------|--------------|--------------|-------------------------|-----------------------|---------------------|
| All                             | LIC | 93   | 37   | 39.8% | 30%       | 50%       | -            | -            | -                       | 0.51 (0.40 to 0.66)   | 0.14 (0.10 to 0.20) |
|                                 | MIC | 2860 | 583  | 20.4% | 19%       | 22%       | <0.001       | -            | 1.95 (1.50 to 2.53)     | -                     | 0.27 (0.21 to 0.36) |
|                                 | HIC | 896  | 50   | 5.6%  | 4%        | 7%        | <0.001       | <0.001       | 7.13 (4.94 to 10.30)    | 3.65 (2.76 to 4.83)   | -                   |
| Gastroschisis                   | LIC | 10   | 9    | 90.0% | 87%       | 93%       | -            | -            | -                       | 0.35 (0.27 to 0.46)   | 0.02 (0.00 to 0.06) |
|                                 | MIC | 304  | 97   | 31.9% | 28%       | 36%       | <0.001       | -            | 2.82 (2.17 to 3.67)     | -                     | 0.05 (0.01 to 0.18) |
|                                 | HIC | 139  | 2    | 1.4%  | 0%        | 5%        | <0.001       | <0.001       | 62.55 (15.56 to 251.47) | 22.18 (5.55 to 88.65) | -                   |
| Congenital diaphragmatic hernia | LIC | 1    | 0    | 0.0%  | -         | -         | -            | -            | -                       | -                     | -                   |
|                                 | MIC | 299  | 115  | 38.5% | 34%       | 43%       | -            | -            | -                       | -                     | 0.37 (0.24 to 0.56) |
|                                 | HIC | 148  | 21   | 14.2% | 11%       | 17%       | -            | <0.001       | -                       | 2.71 (1.78 to 4.13)   | -                   |
| Oesophageal atresia             | LIC | 7    | 6    | 85.7% | 83%       | 89%       | -            | -            | -                       | 0.34 (0.24 to 0.48)   | 0.08 (0.04 to 0.16) |
|                                 | MIC | 412  | 121  | 29.4% | 26%       | 33%       | 0.04         | -            | 2.92 (2.08 to 4.09)     | -                     | 0.24 (0.13 to 0.45) |
|                                 | HIC | 141  | 10   | 7.1%  | 5%        | 9%        | <0.001       | <0.001       | 12.09 (6.19 to 23.61)   | 4.14 (2.24 to 7.67)   | -                   |
| Intestinal atresia              | LIC | 20   | 12   | 60.0% | 56%       | 64%       | -            | -            | -                       | 0.36 (0.24 to 0.53)   | 0.05 (0.02 to 0.14) |
|                                 | MIC | 509  | 109  | 21.4% | 18%       | 24%       | <0.001       | -            | 2.80 (1.89 to 4.16)     | -                     | 0.15 (0.06 to 0.37) |
|                                 | HIC | 152  | 5    | 3.3%  | 1%        | 8%        | <0.001       | <0.001       | 18.24 (7.17 to 46.38)   | 6.51 (2.71 to 15.66)  | -                   |
| Anorectal malformation          | LIC | 25   | 5    | 20.0% | 7%        | 41%       | -            | -            | -                       | 0.60 (0.27 to 1.35)   | 0.08 (0.02 to 0.33) |
|                                 | MIC | 788  | 95   | 12.1% | 10%       | 14%       | 0.219        | -            | 1.66 (0.74 to 3.72)     | -                     | 0.14 (0.04 to 0.44) |
|                                 | HIC | 178  | 3    | 1.7%  | 0%        | 5%        | 0.001        | <0.001       | 11.87 (3.02 to 46.64)   | 7.15 (2.29 to 22.32)  | -                   |
| Hirschsprung's Disease‡         | LIC | 17   | 2    | 11.8% | 1%        | 36%       | -            | -            | -                       | 0.56 (0.15 to 2.18)   | 0.16 (0.02 to 1.05) |
|                                 | MIC | 393  | 26   | 6.6%  | 4%        | 9%        | 0.326        | -            | 1.78 (0.46 to 6.89)     | -                     | 0.28 (0.07 to 1.17) |
|                                 | HIC | 107  | 2    | 1.9%  | 0%        | 7%        | 0.09         | 0.06         | 6.29 (0.95 to 41.75)    | 3.54 (0.85 to 14.68)  | -                   |
| Exomphalos/ Omphalocele‡        | LIC | 14   | 4    | 28.6% | 8%        | 58%       | -            | -            | -                       | 0.71 (0.30 to 1.69)   | 0.60 (0.23 to 1.59) |
|                                 | MIC | 241  | 49   | 20.3% | 16%       | 25%       | 0.498        | -            | 1.41 (0.59 to 3.34)     | -                     | 0.84 (0.48 to 1.49) |
|                                 | HIC | 70   | 12   | 17.1% | 13%       | 21%       | 0.454        | 0.554        | 1.67 (0.63 to 4.42)     | 1.19 (0.67 to 2.10)   | -                   |

\*Wald confidence interval for a proportion formula used when n>5; Exact binomial confidence intervals used when n≤5. †Chi-squared test for n>5 and Fishers exact test for n≤5. ‡For Hirschsprung's disease there was no significant difference in mortality between LMIC (28/410, 6.8%) and HIC (2/107, 1.9%), p=0.0611. For exomphalos there was no significant difference between LMIC (53/255, 20.8%) and HIC (12/70, 17.1%), p=0.5000. CI: Confidence interval. HIC: High-income countries. LIC: Low-income countries. LMIC: Low- and middle-income countries. MIC: Middle-income countries. N: Total number of patients. RR: Risk ratio.

Supplementary Table 10: Univariable analysis of factors affecting mortality for all patients and by country income status (high-income or low- and middle-income)

|                                                                                        | All (N=3849) |           |      |        |         | HIC (N=896) |          |           |        |         | LMIC (N=2953) |          |      |           |         |      |      |        |
|----------------------------------------------------------------------------------------|--------------|-----------|------|--------|---------|-------------|----------|-----------|--------|---------|---------------|----------|------|-----------|---------|------|------|--------|
|                                                                                        | N            | Died (%)  | RR   | 95% CI | P-value | N           | Died (%) | RR        | 95% CI | P-value | N             | Died (%) | RR   | 95% CI    | P-value |      |      |        |
| Sex:                                                                                   |              |           |      |        |         |             |          |           |        |         |               |          |      |           |         |      |      |        |
| Male                                                                                   | 2231         | 375 (17%) | base | -      | -       | -           | 528      | 29 (5%)   | base   | -       | -             | -        | 1703 | 346 (20%) | base    | -    | -    | -      |
| Female                                                                                 | 1596         | 284 (18%) | 1.06 | 0.92   | 1.22    | 0.43        | 367      | 21 (6%)   | 1.04   | 0.60    | 1.80          | 0.88     | 1229 | 263 (21%) | 1.05    | 0.91 | 1.21 | 0.48   |
| Ambiguous                                                                              | 21           | 10 (48%)  | 2.83 | 1.79   | 4.48    | <0.001      | 1*       | 0* (0%)   | -      | -       | -             | -        | 20   | 10 (50%)  | 2.46    | 1.57 | 3.85 | <0.001 |
| Gestational age at birth:                                                              | 3846         | -         | 0.91 | 0.89   | 0.93    | <0.001      | 896      | -         | 0.81   | 0.76    | 0.88          | <0.001   | 2913 | -         | 0.91    | 0.89 | 0.93 | <0.001 |
| Age at presentation (in hours):                                                        | 3838         | -         | 1.00 | 1.00   | 1.00    | 0.01        | 893      | -         | 0.98   | 0.94    | 1.02          | 0.34     | 2944 | -         | 1.00    | 1.00 | 1.00 | 0.01   |
| Weight at presentation (kg):                                                           | 3840         | -         | 0.53 | 0.47   | 0.59    | <0.001      | 894      | -         | 0.33   | 0.23    | 0.48          | <0.001   | 2946 | -         | 0.56    | 0.50 | 0.63 | <0.001 |
| Does the patient have another anomaly or another study condition?                      |              |           |      |        |         |             |          |           |        |         |               |          |      |           |         |      |      |        |
| No                                                                                     | 2071         | 267 (13%) | base | -      | -       | -           | 448      | 8 (2%)    | base   | -       | -             | -        | 1623 | 259 (16%) | base    | -    | -    | -      |
| Yes                                                                                    | 1778         | 403 (23%) | 1.76 | 1.53   | 2.02    | <0.001      | 448      | 42 (9%)   | 5.25   | 2.49    | 11.06         | <0.001   | 1330 | 361 (27%) | 1.70    | 0.14 | 0.18 | <0.001 |
| Antenatal diagnosis?                                                                   |              |           |      |        |         |             |          |           |        |         |               |          |      |           |         |      |      |        |
| No: either no ultrasound or ultrasound with no problem identified                      | 2503         | 419 (17%) | base | -      | -       | -           | 387      | 7 (2%)    | base   | -       | -             | -        | 2116 | 412 (19%) | base    | -    | -    | -      |
| Yes: study condition diagnosed or problem identify                                     | 1338         | 250 (19%) | 1.12 | 0.97   | 1.29    | 0.13        | 506      | 43 (8%)   | 4.70   | 2.14    | 10.33         | <0.001   | 832  | 207 (25%) | 1.28    | 1.10 | 1.48 | 0.001  |
| Distance from the patient's home to the study centre (km):                             | 3844         | -         | 1.00 | 1.00   | 1.00    | 0.03        | 896      | -         | 0.99   | 0.99    | 1.00          | 0.19     | 2948 | -         | 1.00    | 1.00 | 1.00 | 0.01   |
| Born at the study centre?                                                              |              |           |      |        |         |             |          |           |        |         |               |          |      |           |         |      |      |        |
| No                                                                                     | 2833         | 497 (18%) | base | -      | -       | -           | 504      | 14 (3%)   | base   | -       | -             | -        | 2329 | 483 (21%) | base    | -    | -    | -      |
| Yes                                                                                    | 1011         | 173 (17%) | 0.98 | 0.83   | 1.14    | 0.76        | 391      | 36 (9%)   | 3.31   | 1.81    | 6.06          | <0.001   | 620  | 137 (22%) | 1.07    | 0.90 | 1.26 | 0.46   |
| Type of delivery:                                                                      |              |           |      |        |         |             |          |           |        |         |               |          |      |           |         |      |      |        |
| Vaginal (spontaneous)                                                                  | 1767         | 333 (19%) | base | -      | -       | -           | 373      | 19 (5%)   | base   | -       | -             | -        | 1394 | 314 (23%) | base    | -    | -    | -      |
| Vaginal (induced)                                                                      | 194          | 16 (8%)   | 0.44 | 0.27   | 0.71    | <0.001      | 97       | 2 (2%)    | 0.41   | 0.10    | 1.71          | 0.22     | 97   | 14 (14%)  | 0.64    | 0.39 | 1.05 | 0.08   |
| Caesarean section (elective)                                                           | 1022         | 150 (15%) | 0.78 | 0.65   | 0.93    | 0.01        | 185      | 9 (5%)    | 0.96   | 0.44    | 2.07          | 0.91     | 837  | 141 (17%) | 0.75    | 0.63 | 0.89 | 0.001  |
| Caesarean section (urgent/non-elective)                                                | 825          | 169 (20%) | 1.09 | 0.92   | 1.28    | 0.32        | 226      | 20 (9%)   | 1.74   | 0.95    | 3.18          | 0.07     | 599  | 149 (25%) | 1.10    | 0.93 | 1.31 | 0.25   |
| Was the patient septic on arrival to your hospital?                                    |              |           |      |        |         |             |          |           |        |         |               |          |      |           |         |      |      |        |
| No                                                                                     | 3187         | 428 (13%) | base | -      | -       | -           | 857      | 47 (5%)   | base   | -       | -             | -        | 2330 | 381 (16%) | base    | -    | -    | -      |
| Yes                                                                                    | 659          | 242 (37%) | 2.73 | 2.39   | 3.12    | <0.001      | 38       | 3 (8%)    | 1.44   | 0.47    | 4.42          | 0.52     | 621  | 239 (38%) | 2.35    | 2.06 | 2.69 | <0.001 |
| Was the patient hypothermic and/or hypovolaemic on arrival to your hospital?           |              |           |      |        |         |             |          |           |        |         |               |          |      |           |         |      |      |        |
| No                                                                                     | 3112         | 402 (13%) | base | -      | -       | -           | 797      | 34 (4%)   | base   | -       | -             | -        | 2315 | 368 (16%) | base    | -    | -    | -      |
| Yes                                                                                    | 737          | 268 (36%) | 2.82 | 2.47   | 3.21    | <0.001      | 99       | 16 (16%)  | 3.79   | 2.17    | 6.61          | <0.001   | 638  | 252 (39%) | 2.48    | 2.17 | 2.84 | <0.001 |
| Did the patient receive an umbilical vein catheter?                                    |              |           |      |        |         |             |          |           |        |         |               |          |      |           |         |      |      |        |
| No                                                                                     | 3447         | 557 (16%) | base | -      | -       | -           | 743      | 27 (4%)   | base   | -       | -             | -        | 2704 | 530 (20%) | base    | -    | -    | -      |
| Yes                                                                                    | 402          | 113 (28%) | 1.74 | 1.46   | 2.07    | <0.001      | 153      | 23 (15%)  | 4.14   | 2.44    | 7.02          | <0.001   | 249  | 90 (36%)  | 1.84    | 1.54 | 2.21 | <0.001 |
| Did the patient receive a peripherally inserted central catheter (PICC)?               |              |           |      |        |         |             |          |           |        |         |               |          |      |           |         |      |      |        |
| No                                                                                     | 2729         | 552 (20%) | base | -      | -       | -           | 460      | 30 (7%)   | base   | -       | -             | -        | 2269 | 522 (23%) | base    | -    | -    | -      |
| Yes                                                                                    | 1120         | 118 (11%) | 0.52 | 0.43   | 0.63    | <0.001      | 436      | 20 (5%)   | 0.70   | 0.41    | 1.22          | 0.21     | 684  | 98 (14%)  | 0.62    | 0.51 | 0.76 | <0.001 |
| Did the patient receive a percutaneously inserted direct central line?                 |              |           |      |        |         |             |          |           |        |         |               |          |      |           |         |      |      |        |
| No                                                                                     | 3434         | 629 (18%) | base | -      | -       | -           | 709      | 40 (6%)   | base   | -       | -             | -        | 2725 | 589 (22%) | base    | -    | -    | -      |
| Yes                                                                                    | 415          | 41 (10%)  | 0.54 | 0.40   | 0.73    | <0.001      | 187      | 10 (5%)   | 0.95   | 0.48    | 1.86          | 0.88     | 228  | 31 (14%)  | 0.63    | 0.45 | 0.88 | 0.01   |
| Did the patient receive a surgically placed direct central line?                       |              |           |      |        |         |             |          |           |        |         |               |          |      |           |         |      |      |        |
| No                                                                                     | 3595         | 615 (17%) | base | -      | -       | -           | 869      | 49 (6%)   | base   | -       | -             | -        | 2726 | 566 (21%) | base    | -    | -    | -      |
| Yes                                                                                    | 254          | 55 (22%)  | 1.27 | 0.99   | 1.62    | 0.06        | 27       | 1 (4%)    | 0.66   | 0.09    | 4.59          | 0.67     | 227  | 54 (24%)  | 1.15    | 0.90 | 1.46 | 0.28   |
| Time from arrival at study centre to primary intervention (hours)†                     | 3432         | -         | 1.00 | 1.00   | 1.00    | 0.05        | 826      | -         | 1.00   | 1.00    | 1.00          | 0.65     | 2606 | -         | 1.00    | 1.00 | 1.00 | 0.02   |
| American Society of Anesthesiologists (ASA) Score at the time of primary intervention: |              |           |      |        |         |             |          |           |        |         |               |          |      |           |         |      |      |        |
| 1 or 2                                                                                 | 1873         | 146 (8%)  | base | -      | -       | -           | 375      | 4 (1%)    | base   | -       | -             | -        | 1498 | 142 (9%)  | base    | -    | -    | -      |
| 3                                                                                      | 1046         | 183 (17%) | 2.24 | 1.83   | 2.75    | <0.001      | 316‡     | 9‡ (3%)   | 2.67   | 0.83    | 8.59          | 0.10     | 730  | 174 (24%) | 2.51    | 2.05 | 3.08 | <0.001 |
| 4 or 5                                                                                 | 526          | 195 (37%) | 4.76 | 3.93   | 5.76    | <0.001      | 137‡     | 19‡ (14%) | 13.00  | 4.50    | 37.56         | <0.001   | 389  | 176 (45%) | 4.77    | 3.94 | 5.78 | <0.001 |
| N/A: no intervention                                                                   | 395          | 144 (36%) | 4.68 | 3.82   | 5.73    | <0.001      | 62       | 18 (29%)  | 27.22  | 9.52    | 77.79         | <0.001   | 333  | 126 (38%) | 3.99    | 3.24 | 4.92 | <0.001 |
| What type of anaesthesia was used for the primary intervention?                        |              |           |      |        |         |             |          |           |        |         |               |          |      |           |         |      |      |        |
| General anaesthesia with endotracheal tube or laryngeal airway                         | 3154         | 444 (14%) | base | -      | -       | -           | 772§     | 24§ (3%)  | base   | -       | -             | -        | 2382 | 420 (18%) | base    | -    | -    | -      |
| No general anaesthesia                                                                 | 301          | 46 (15%)  | 1.09 | 0.82   | 1.44    | 0.57        | 69§      | 6§ (9%)   | 2.80   | 1.18    | 6.61          | 0.02     | 232  | 40 (17%)  | 0.98    | 0.73 | 1.31 | 0.88   |



|                                                                                 |      |     |       |      |      |       |             |      |     |       |       |      |       |             |      |       |       |      |      |        |             |  |
|---------------------------------------------------------------------------------|------|-----|-------|------|------|-------|-------------|------|-----|-------|-------|------|-------|-------------|------|-------|-------|------|------|--------|-------------|--|
| N/A: no surgery or primary intervention undertaken.                             | 392  | 179 | (46%) | 3-24 | 2-83 | 3-72  | <0-001      | 55§  | 20§ | (36%) | 11-62 | 6-86 | 19-68 | <0-001      | 337  | 159   | (47%) | 2-68 | 2-32 | 3-09   | <0-001      |  |
| Who undertook the anaesthetic for the primary intervention?                     |      |     |       |      |      |       |             |      |     |       |       |      |       |             |      |       |       |      |      |        |             |  |
| Anaesthetic doctor                                                              | 3115 | 433 | (14%) | base | -    | -     | -           | 741  | 22  | (3%)  | base  | -    | -     | -           | 2374 | 411   | (17%) | base | -    | -      | -           |  |
| Non-doctor anaesthetist                                                         | 121  | 33  | (27%) | 1-96 | 1-45 | 2-66  | <0-001      | 43   | 4   | (9%)  | 3-13  | 1-13 | 8-69  | <b>0-03</b> | 78   | 29    | (37%) | 2-15 | 1-59 | 2-90   | <0-001      |  |
| No anaesthetic undertaken                                                       | 610  | 202 | (33%) | 2-38 | 2-07 | 2-75  | <0-001      | 112  | 24  | (21%) | 7-22  | 4-19 | 12-43 | <0-001      | 498  | 178   | (36%) | 2-06 | 1-78 | 2-39   | <0-001      |  |
| Who undertook the primary intervention?                                         |      |     |       |      |      |       |             |      |     |       |       |      |       |             |      |       |       |      |      |        |             |  |
| Paediatric surgeon (or junior with paediatric surgeon assisting/ in the room)   | 3345 | 475 | (14%) | base | -    | -     | -           | 825§ | 32§ | (4%)  | base  | -    | -     | -           | 2520 | 443   | (18%) | base | -    | -      | -           |  |
| Non-paediatric surgeon                                                          | 140  | 20  | (14%) | 1-01 | 0-66 | 1-52  | 0-98        | 21§  | 0§  | (0%)  | -     | -    | -     | -           | 199  | 20    | (10%) | 0-96 | 0-64 | 1-44   | 0-83        |  |
| N/A: no surgery or primary intervention undertaken                              | 361  | 174 | (48%) | 3-39 | 2-96 | 3-89  | <0-001      | 49§  | 18§ | (37%) | 9-47  | 5-74 | 15-62 | <0-001      | 312  | 156   | (50%) | 2-84 | 2-47 | 3-27   | <0-001      |  |
| Was a Surgical Safety Checklist used at the time of primary intervention?       |      |     |       |      |      |       |             |      |     |       |       |      |       |             |      |       |       |      |      |        |             |  |
| Yes                                                                             | 2569 | 275 | (11%) | base | -    | -     | -           | 747  | 25  | (3%)  | base  | -    | -     | -           | 1822 | 250   | (14%) | base | -    | -      | -           |  |
| No                                                                              | 693  | 210 | (30%) | 2-83 | 2-41 | 3-32  | <0-001      | 39   | 3   | (8%)  | 2-30  | 0-72 | 7-29  | 0-16        | 654  | 207   | (32%) | 2-31 | 1-96 | 2-71   | <0-001      |  |
| N/A: a conservative primary intervention was undertaken / no surgery undertaken | 584  | 184 | (32%) | 2-94 | 2-50 | 3-47  | <0-001      | 109  | 22  | (20%) | 6-03  | 3-53 | 10-32 | <0-001      | 475  | 162   | (34%) | 2-49 | 2-10 | 2-95   | <0-001      |  |
| Total duration of antibiotics following primary intervention (days):†           | 3802 | -   | -     | 0-96 | 0-94 | 0-97  | <0-001      | 887  | -   | -     | 0-96  | 0-91 | 1-02  | 0-19        | 2915 | -     | -     | 0-94 | 0-93 | 0-96   | <0-001      |  |
| Did the patient receive a blood transfusion?                                    |      |     |       |      |      |       |             |      |     |       |       |      |       |             |      |       |       |      |      |        |             |  |
| No: not required.                                                               | 2448 | 276 | (11%) | base | -    | -     | -           | 671  | 19  | (3%)  | base  | -    | -     | -           | 1777 | 257   | (14%) | base | -    | -      | -           |  |
| Yes: cross-matched or not cross-matched.                                        | 1348 | 377 | (28%) | 2-48 | 2-16 | 2-85  | <0-001      | 213  | 30  | (14%) | 4-97  | 2-86 | 8-66  | <0-001      | 1135 | 347   | (31%) | 2-11 | 1-83 | 2-44   | <0-001      |  |
| No: it was required but not available.                                          | 47   | 17  | (36%) | 3-21 | 2-16 | 4-77  | <0-001      | 9*   | 1*  | (11%) | 3-92  | 0-59 | 26-27 | 0-16        | 38   | 16    | (42%) | 2-91 | 1-97 | 4-30   | <0-001      |  |
| Did the patient require ventilation?                                            |      |     |       |      |      |       |             |      |     |       |       |      |       |             |      |       |       |      |      |        |             |  |
| No                                                                              | 1755 | 179 | (10%) | base | -    | -     | -           | 258  | 3   | (1%)  | base  | -    | -     | -           | 1497 | 176   | (12%) | base | -    | -      | -           |  |
| Yes and it was given                                                            | 2008 | 416 | (21%) | 2-03 | 1-73 | 2-39  | <0-001      | 637  | 47  | (7%)  | 6-35  | 1-99 | 20-23 | <0-001      | 1371 | 369   | (27%) | 2-29 | 1-94 | 2-70   | <0-001      |  |
| Yes, but it was not available                                                   | 85   | 75  | (88%) | 8-65 | 7-38 | 10-14 | <0-001      | 1*   | 0*  | (0%)  | -     | -    | -     | -           | 84   | 75    | (89%) | 7-59 | 6-49 | 8-89   | <0-001      |  |
| Did the patient require parenteral nutrition?                                   |      |     |       |      |      |       |             |      |     |       |       |      |       |             |      |       |       |      |      |        |             |  |
| No                                                                              | 1476 | 278 | (19%) | base | -    | -     | -           | 212  | 14  | (7%)  | base  | -    | -     | -           | 1264 | 264   | (21%) | base | -    | -      | -           |  |
| Yes and it was given                                                            | 2102 | 253 | (12%) | 0-64 | 0-55 | 0-75  | <0-001      | 683  | 36  | (5%)  | 0-80  | 0-44 | 1-45  | 0-46        | 1419 | 217   | (15%) | 0-73 | 0-62 | 0-86   | <0-001      |  |
| Yes and it was sometimes available, but less than required                      | 143  | 52  | (36%) | 1-93 | 1-52 | 2-46  | <0-001      | 0*   | 0*  | -     | -     | -    | -     | 143         | 52   | (36%) | 1-74  | 1-37 | 2-22 | <0-001 |             |  |
| Yes, but it was not available                                                   | 125  | 86  | (69%) | 3-65 | 3-12 | 4-28  | <0-001      | 0*   | 0*  | -     | -     | -    | -     | 125         | 86   | (69%) | 3-29  | 2-81 | 3-86 | <0-001 |             |  |
| Duration of hospital stay (days):**                                             | 3541 | -   | -     | 0-92 | 0-91 | 0-93  | <0-001      | 757  | -   | -     | 0-89  | 0-86 | 0-93  | <0-001      | 2784 | -     | -     | 0-93 | 0-91 | 0-94   | <0-001      |  |
| Did the patient have a surgical site infection?                                 |      |     |       |      |      |       |             |      |     |       |       |      |       |             |      |       |       |      |      |        |             |  |
| No                                                                              | 2942 | 413 | (14%) | base | -    | -     | -           | 728  | 29  | (4%)  | base  | -    | -     | -           | 2214 | 384   | (17%) | base | -    | -      | -           |  |
| Yes                                                                             | 335  | 63  | (19%) | 1-34 | 1-05 | 1-70  | <b>0-02</b> | 76   | 2   | (3%)  | 0-66  | 0-16 | 2-72  | 0-57        | 259  | 61    | (24%) | 1-36 | 1-07 | 1-72   | <b>0-01</b> |  |
| N/A: no surgical wound                                                          | 569  | 193 | (34%) | 2-42 | 2-09 | 2-79  | <0-001      | 92   | 19  | (21%) | 5-18  | 3-03 | 8-87  | <0-001      | 477  | 174   | (36%) | 2-10 | 1-81 | 2-44   | <0-001      |  |
| Did the patient have a full thickness wound dehiscence?                         |      |     |       |      |      |       |             |      |     |       |       |      |       |             |      |       |       |      |      |        |             |  |
| No                                                                              | 3178 | 445 | (14%) | base | -    | -     | -           | 792§ | 30§ | (4%)  | base  | -    | -     | -           | 2386 | 415   | (17%) | base | -    | -      | -           |  |
| Yes                                                                             | 102  | 24  | (24%) | 1-68 | 1-17 | 2-41  | <0-001      | 12§  | 0§  | (0%)  | -     | -    | -     | -           | 90   | 24    | (27%) | 1-53 | 1-08 | 2-18   | <b>0-02</b> |  |
| N/A: no surgical wound                                                          | 566  | 200 | (35%) | 2-52 | 2-19 | 2-91  | <0-001      | 92§  | 20§ | (22%) | 5-74  | 3-40 | 9-68  | <0-001      | 474  | 180   | (38%) | 2-18 | 1-89 | 2-52   | <0-001      |  |
| Did the patient require a further unplanned intervention?                       |      |     |       |      |      |       |             |      |     |       |       |      |       |             |      |       |       |      |      |        |             |  |
| No                                                                              | 3045 | 400 | (13%) | base | -    | -     | -           | 728  | 23  | (3%)  | base  | -    | -     | -           | 2317 | 377   | (16%) | base | -    | -      | -           |  |
| Yes - percutaneous or surgical intervention                                     | 453  | 98  | (22%) | 1-65 | 1-35 | 2-01  | <0-001      | 117  | 10  | (9%)  | 2-71  | 1-32 | 5-54  | <b>0-01</b> | 336  | 88    | (26%) | 1-61 | 1-32 | 1-97   | <0-001      |  |
| N/A: no primary intervention undertaken                                         | 347  | 171 | (49%) | 3-75 | 3-26 | 4-32  | <0-001      | 51   | 17  | (33%) | 10-55 | 6-03 | 18-46 | <0-001      | 296  | 154   | (52%) | 3-20 | 2-77 | 3-69   | <0-001      |  |
| Condition                                                                       |      |     |       |      |      |       |             |      |     |       |       |      |       |             |      |       |       |      |      |        |             |  |
| Oesophageal atresia                                                             | 560  | 137 | (24%) | 1-51 | 1-28 | 1-78  | <0-001      | 141  | 10  | (7%)  | 1-34  | 0-69 | 2-61  | 0-40        | 419  | 127   | (30%) | 1-56 | 1-32 | 1-84   | <0-001      |  |
| Congenital diaphragmatic hernia                                                 | 448  | 136 | (30%) | 1-93 | 1-65 | 2-27  | <0-001      | 148  | 21  | (14%) | 3-66  | 2-15 | 6-24  | <0-001      | 300  | 115   | (38%) | 2-01 | 1-71 | 2-37   | <0-001      |  |
| Intestinal atresia                                                              | 681  | 126 | (19%) | 1-08 | 0-90 | 1-28  | 0-40        | 152  | 5   | (3%)  | 0-54  | 0-22 | 1-35  | 0-19        | 529  | 121   | (23%) | 1-11 | 0-93 | 1-32   | 0-24        |  |
| Gastroschisis                                                                   | 453  | 108 | (24%) | 1-44 | 1-20 | 1-73  | <0-001      | 139  | 2   | (1%)  | 0-22  | 0-06 | 0-92  | <b>0-04</b> | 314  | 106   | (34%) | 1-73 | 1-46 | 2-06   | <0-001      |  |
| Exomphalos/ Omphalocele                                                         | 325  | 65  | (20%) | 1-16 | 0-93 | 1-47  | 0-19        | 70   | 12  | (17%) | 3-73  | 2-04 | 6-80  | <0-001      | 255  | 53    | (21%) | 0-99 | 0-78 | 1-27   | 0-93        |  |
| Anorectal malformation                                                          | 991  | 103 | (10%) | 0-52 | 0-43 | 0-64  | <0-001      | 178  | 3   | (2%)  | 0-26  | 0-08 | 0-82  | <b>0-02</b> | 813  | 100   | (12%) | 0-51 | 0-42 | 0-62   | <0-001      |  |
| Hirschsprung's Disease                                                          | 517  | 30  | (6%)  | 0-30 | 0-21 | 0-43  | <0-001      | 107  | 2   | (2%)  | 0-31  | 0-08 | 1-25  | 0-10        | 410  | 28    | (7%)  | 0-29 | 0-20 | 0-42   | <0-001      |  |
| Country income status:                                                          |      |     |       |      |      |       |             |      |     |       |       |      |       |             |      |       |       |      |      |        |             |  |
| HIC                                                                             | 896  | 50  | (6%)  | base | -    | -     | -           | -    | -   | -     | -     | -    | -     | -           | -    | -     | -     | -    | -    | -      | -           |  |
| MIC                                                                             | 2860 | 583 | (20%) | 3-65 | 2-76 | 4-83  | <0-001      | -    | -   | -     | -     | -    | -     | -           | -    | -     | -     | -    | -    | -      | -           |  |
| LIC                                                                             | 93   | 37  | (40%) | 7-13 | 4-94 | 10-30 | <0-001      | -    | -   | -     | -     | -    | -     | -           | -    | -     | -     | -    | -    | -      | -           |  |

\*Category/patients excluded from multivariable analysis due to no or low counts. †Sub-group therefore excluded from multivariable analysis. ‡Categories collapsed for multivariable analysis. §Variable excluded from multivariable analysis due to low or no counts. \*\*Excluded from multivariable analysis due to missing data. CI: Confidence interval. HIC: High-income countries. LIC: Low-income countries. MIC: Middle-income countries. N/A: Not applicable. RR: Risk Ratio.

**Supplementary Table 11: Univariable analysis of factors affecting mortality for patients with oesophageal atresia**

| Generic variables                                                                      | N (total = 560) | Died, n | Died, % | RR        | 95% CI | P value |
|----------------------------------------------------------------------------------------|-----------------|---------|---------|-----------|--------|---------|
| Sex:                                                                                   |                 |         |         |           |        |         |
| Male                                                                                   | 314             | 75      | 24%     | Reference | -      | -       |
| Female                                                                                 | 242             | 61      | 25%     | 1.06      | 0.79   | 1.42    |
| Ambiguous*                                                                             | 4               | 1       | 25%     | 1.05      | 0.19   | 5.79    |
| Gestational age at birth:                                                              | 557             | -       | -       | 0.91      | 0.87   | 0.94    |
| Age at presentation (in hours):                                                        | 560             | -       | -       | 1.00      | 1.00   | 1.00    |
| Weight at presentation (kg):                                                           | 558             | -       | -       | 0.51      | 0.41   | 0.64    |
| Does the patient have another anomaly or another study condition?                      |                 |         |         |           |        |         |
| No                                                                                     | 190             | 26      | 14%     | Reference | -      | -       |
| Yes                                                                                    | 370             | 111     | 30%     | 2.19      | 1.48   | 3.24    |
| Antenatal diagnosis?                                                                   |                 |         |         |           |        |         |
| No: either no ultrasound or ultrasound with no problem identified                      | 368             | 95      | 26%     | Reference | -      | -       |
| Yes: study condition diagnosed or problem identified                                   | 191             | 42      | 22%     | 0.85      | 0.62   | 1.17    |
| Distance from the patients home to the study centre (km):                              | 560             | -       | -       | 1.00      | 1.00   | 1.00    |
| Born at the study centre?                                                              |                 |         |         |           |        |         |
| No                                                                                     | 426             | 105     | 25%     | Reference | -      | -       |
| Yes                                                                                    | 133             | 32      | 24%     | 0.98      | 0.69   | 1.38    |
| Type of delivery:                                                                      |                 |         |         |           |        |         |
| Vaginal (spontaneous)                                                                  | 222             | 56      | 25%     | Reference | -      | -       |
| Vaginal (induced)                                                                      | 32              | 4       | 13%     | 0.50      | 0.19   | 1.28    |
| Caesarean section (elective)                                                           | 145             | 32      | 22%     | 0.87      | 0.60   | 1.28    |
| Caesarean section (urgent/non-elective)                                                | 157             | 44      | 28%     | 1.11      | 0.79   | 0.156   |
| Was the patient septic on arrival to your hospital?                                    |                 |         |         |           |        |         |
| No                                                                                     | 436             | 81      | 19%     | Reference | -      | -       |
| Yes                                                                                    | 124             | 56      | 45%     | 2.43      | 1.84   | 3.20    |
| Was the patient hypothermic and/or hypovolaemic on arrival to your hospital?           |                 |         |         |           |        |         |
| No                                                                                     | 449             | 82      | 18%     | Reference | -      | -       |
| Yes                                                                                    | 111             | 55      | 50%     | 2.71      | 2.07   | 3.56    |
| Did the patient receive an umbilical vein catheter?                                    |                 |         |         |           |        |         |
| No                                                                                     | 486             | 122     | 25%     | Reference | -      | -       |
| Yes                                                                                    | 74              | 15      | 20%     | 0.81      | 0.50   | 1.30    |
| Did the patient receive a peripherally inserted central catheter (PICC)?               |                 |         |         |           |        |         |
| No                                                                                     | 381             | 115     | 30%     | Reference | -      | -       |
| Yes                                                                                    | 179             | 22      | 12%     | 0.41      | 0.27   | 0.62    |
| Did the patient receive a percutaneously inserted central line?                        |                 |         |         |           |        |         |
| No                                                                                     | 468             | 131     | 28%     | Reference | -      | -       |
| Yes                                                                                    | 92              | 6       | 7%      | 0.23      | 0.10   | 0.51    |
| Did the patient receive a surgically placed open central line?                         |                 |         |         |           |        |         |
| No                                                                                     | 500             | 125     | 25%     | Reference | -      | -       |
| Yes                                                                                    | 60              | 12      | 20%     | 0.80      | 0.47   | 1.36    |
| Time from arrival at study centre to primary intervention (hours) †                    | 498             | -       | -       | 1.00      | 1.00   | 1.00    |
| American Society of Anesthesiologists (ASA) Score at the time of primary intervention: |                 |         |         |           |        |         |
| 1 or 2                                                                                 | 223             | 26      | 12%     | Reference | -      | -       |
| 3                                                                                      | 166             | 34      | 21%     | 1.76      | 1.10   | 2.81    |
| 4 or 5                                                                                 | 131             | 51      | 39%     | 3.34      | 2.19   | 5.08    |
| N/A: no intervention‡                                                                  | 37              | 26      | 70%     | 6.03      | 3.97   | 9.15    |
| What type of anaesthesia was used for the primary intervention? §                      |                 |         |         |           |        |         |
| General anaesthesia                                                                    | 507             | 95      | 19%     | Reference | -      | -       |
| No general anaesthesia                                                                 | 4               | 4       | 100%    | 5.34      | 4.45   | 6.40    |
| N/A: no surgery or primary intervention undertaken                                     | 49              | 38      | 78%     | 4.14      | 3.27   | 5.24    |
| Who undertook the anaesthetic for the primary intervention? §                          |                 |         |         |           |        |         |
| Anaesthetic doctor                                                                     | 506             | 94      | 19%     | Reference | -      | -       |
| Non-doctor anaesthetist                                                                | 4               | 4       | 100%    | 5.38      | 4.48   | 6.46    |
| No anaesthetic undertaken                                                              | 50              | 39      | 78%     | 4.20      | 3.32   | 5.31    |
| Who undertook the primary intervention?                                                |                 |         |         |           |        |         |
| Paediatric surgeon (or junior with paediatric surgeon assisting/ in the room)          | 508             | 100     | 20%     | Reference | -      | -       |
| Non-paediatric surgeon                                                                 | 5               | 1       | 20%     | 1.02      | 0.17   | 5.93    |
| N/A: no surgery or primary intervention undertaken ‡                                   | 47              | 36      | 77%     | 3.89      | 3.07   | 4.93    |
| Was a Surgical Safety Checklist used at the time of primary intervention?              |                 |         |         |           |        |         |
| Yes                                                                                    | 423             | 61      | 14%     | Reference | -      | -       |
| No                                                                                     | 90              | 43      | 48%     | 3.31      | 2.41   | 4.55    |
| N/A: a conservative primary intervention was undertaken / no surgery undertaken‡       | 47              | 33      | 70%     | 4.87      | 3.61   | 6.56    |
| Total duration of antibiotics following primary intervention (days): †                 | 553             | -       | -       | 0.94      | 0.92   | 0.97    |
| Did the patient receive a blood transfusion?                                           |                 |         |         |           |        |         |
| No: not required                                                                       | 295             | 51      | 17%     | Reference | -      | -       |
| Yes: cross-matched OR not cross-matched                                                | 257             | 82      | 32%     | 1.85      | 1.36   | 2.51    |
| No: it was required but not available *                                                | 7               | 4       | 57%     | 3.31      | 1.66   | 6.58    |
| Did the patient require ventilation?                                                   |                 |         |         |           |        |         |
| No                                                                                     | 71              | 22      | 31%     | Reference | -      | -       |
| Yes and it was given                                                                   | 475             | 102     | 22%     | 0.69      | 0.47   | 1.02    |
| Yes, but it was not available                                                          | 14              | 13      | 93%     | 3.00      | 2.05   | 4.37    |
| Did the patient require parenteral nutrition?                                          |                 |         |         |           |        |         |
| No                                                                                     | 125             | 59      | 47%     | Reference | -      | -       |

|                                                                                                                 |     |     |     |           |      |       |        |
|-----------------------------------------------------------------------------------------------------------------|-----|-----|-----|-----------|------|-------|--------|
| Yes and it was given                                                                                            | 398 | 53  | 13% | 0.28      | 0.21 | 0.39  | <0.001 |
| Yes and it was sometimes available, but less than required **                                                   | 14  | 8   | 57% | 1.21      | 0.74 | 1.98  | 0.445  |
| Yes, but it was not available **                                                                                | 23  | 17  | 74% | 1.57      | 1.15 | 2.17  | 0.004  |
| Time to first feed (days): †                                                                                    | 439 | -   | -   | 0.96      | 0.91 | 1.01  | 0.092  |
| Time to full feeds (days): †                                                                                    | 419 | -   | -   | 0.96      | 0.88 | 1.04  | 0.313  |
| Duration of hospital stay (days): ***                                                                           | 503 | -   | -   | 0.91      | 0.89 | 0.92  | <0.001 |
| Did the patient have a surgical site infection?                                                                 |     |     |     |           |      |       |        |
| No                                                                                                              | 443 | 85  | 19% | Reference | -    | -     | -      |
| Yes                                                                                                             | 63  | 15  | 24% | 1.24      | 0.77 | 2.01  | 0.380  |
| N/A: no surgical wound ‡                                                                                        | 54  | 37  | 69% | 3.57      | 2.74 | 4.65  | <0.001 |
| Did the patient have a full thickness wound dehiscence? §                                                       |     |     |     |           |      |       |        |
| No                                                                                                              | 497 | 97  | 20% | Reference | -    | -     | -      |
| Yes                                                                                                             | 7   | 2   | 29% | 1.46      | 0.45 | 4.79  | 0.529  |
| N/A: no surgical wound                                                                                          | 56  | 38  | 68% | 3.48      | 2.70 | 4.48  | <0.001 |
| Did the patient require a further unplanned intervention?                                                       |     |     |     |           |      |       |        |
| No                                                                                                              | 443 | 89  | 20% | Reference | -    | -     | -      |
| Yes - percutaneous or surgical intervention                                                                     | 71  | 14  | 20% | 0.98      | 0.59 | 1.63  | 0.942  |
| N/A: no primary intervention undertaken ‡                                                                       | 46  | 34  | 74% | 3.68      | 2.85 | 4.74  | <0.001 |
| Country income status:                                                                                          |     |     |     |           |      |       |        |
| HIC                                                                                                             | 141 | 10  | 7%  | Reference | -    | -     | -      |
| MIC **                                                                                                          | 412 | 121 | 29% | 4.14      | 2.24 | 7.67  | <0.001 |
| LIC **                                                                                                          | 7   | 6   | 86% | 12.09     | 6.18 | 23.62 | <0.001 |
| <b>Condition specific variables</b>                                                                             |     |     |     |           |      |       |        |
| Type of OA +/- TOF (Gross classification):                                                                      |     |     |     |           |      |       |        |
| Distal TOF with proximal OA (type C)                                                                            | 476 | 123 | 26% | Reference | -    | -     | -      |
| Other type (types A,B,D or E)                                                                                   | 84  | 14  | 17% | 0.64      | 0.39 | 1.07  | 0.087  |
| Long or short gap?                                                                                              |     |     |     |           |      |       |        |
| Short                                                                                                           | 375 | 57  | 15% | Reference | -    | -     | -      |
| Long                                                                                                            | 111 | 37  | 33% | 2.19      | 1.54 | 3.13  | <0.001 |
| Unknown                                                                                                         | 74  | 43  | 58% | 3.82      | 2.81 | 5.2   | <0.001 |
| Pneumonia at presentation?                                                                                      |     |     |     |           |      |       |        |
| No                                                                                                              | 374 | 62  | 17% | reference | -    | -     | -      |
| Yes                                                                                                             | 186 | 75  | 40% | 2.43      | 1.83 | 3.24  | <0.001 |
| Did the patient have tracheomalacia?                                                                            |     |     |     |           |      |       |        |
| No                                                                                                              | 487 | 125 | 26% | reference | -    | -     | -      |
| Yes                                                                                                             | 73  | 12  | 16% | 0.64      | 0.37 | 1.10  | 0.105  |
| Primary intervention:                                                                                           |     |     |     |           |      |       |        |
| Primary oesophageal anastomosis                                                                                 | 385 | 56  | 15% | reference | -    | -     | -      |
| No primary oesophageal anastomosis                                                                              | 125 | 42  | 34% | 2.31      | 1.63 | 3.26  | <0.001 |
| Palliative care‡                                                                                                | 50  | 39  | 78% | 5.36      | 4.04 | 7.12  | <0.001 |
| Surgical approach: †                                                                                            |     |     |     |           |      |       |        |
| Open surgery: thoracotomy (muscle cutting or splitting), laparotomy, local incision, cervical approach or other | 405 | 87  | 22% | reference | -    | -     | -      |
| Minimally invasive approach                                                                                     | 95  | 8   | 8%  | 0.39      | 0.20 | 0.78  | 0.008  |
| Not applicable/no intervention/unknown                                                                          | 25  | 16  | 64% | 2.98      | 2.10 | 4.22  | <0.001 |
| Condition specific complications:                                                                               |     |     |     |           |      |       |        |
| Pneumonia                                                                                                       |     |     |     |           |      |       |        |
| No                                                                                                              | 443 | 94  | 21% | reference | -    | -     | -      |
| Yes                                                                                                             | 117 | 43  | 37% | 1.73      | 1.29 | 2.33  | <0.001 |
| Mediastinitis                                                                                                   |     |     |     |           |      |       |        |
| No                                                                                                              | 523 | 118 | 23% | reference | -    | -     | -      |
| Yes                                                                                                             | 37  | 19  | 51% | 2.28      | 1.60 | 3.24  | <0.001 |
| Pneumothorax                                                                                                    |     |     |     |           |      |       |        |
| No                                                                                                              | 503 | 123 | 25% | reference | -    | -     | -      |
| Yes                                                                                                             | 57  | 14  | 25% | 1.00      | 0.62 | 1.62  | 0.99   |
| Anastomotic leak                                                                                                |     |     |     |           |      |       |        |
| No                                                                                                              | 497 | 120 | 24% | reference | -    | -     | -      |
| Yes                                                                                                             | 63  | 17  | 27% | 1.12      | 0.72 | 1.73  | 0.62   |
| Anastomotic stricture                                                                                           |     |     |     |           |      |       |        |
| No                                                                                                              | 533 | 136 | 26% | reference | -    | -     | -      |
| Yes                                                                                                             | 27  | 1   | 4%  | 0.15      | 0.02 | 1.00  | 0.05   |

\*Excluded from multivariable analysis due to low counts and inability to combine with another category. †Excluded from multivariable analysis as this variable is a sub-group. ‡N/A groups were not presented on the forest plots. §Excluded from the multivariable analysis due to low counts and inability to collapse categories further. \*\*Category collapsed for the multivariable analysis due to low counts. \*\*\*Excluded from multivariable analysis due to missing data. CI: Confidence interval. HIC: High-income countries. LIC: Low-income countries. MIC: Middle-income countries. N/A: Not applicable. OA: Oesophageal Atresia. RR: Risk Ratio. TOF: Tracheo-oesophageal fistula.

**Supplementary Table 12: Univariable analysis of factors affecting mortality for patients with congenital diaphragmatic hernia**

| Generic variables                                                                      | N (total = 448) | Died, N | Died, % | RR        | 95% CI   |        | P value |
|----------------------------------------------------------------------------------------|-----------------|---------|---------|-----------|----------|--------|---------|
| Sex:                                                                                   |                 |         |         |           |          |        |         |
| Male                                                                                   | 262             | 80      | 31%     | Reference | -        | -      | -       |
| Female                                                                                 | 186             | 56      | 30%     | 0.99      | 0.74     | 1.31   | 0.9     |
| Gestational age at birth:                                                              | 437             | -       | -       | 0.92      | 0.89     | 0.95   | <0.001  |
| Age at presentation (in hours):                                                        | 446             | -       | -       | 0.99      | 0.99     | 1.00   | 0.09    |
| Weight at presentation (kg):                                                           | 448             | -       | -       | 0.59      | 0.51     | 0.68   | <0.001  |
| Does the patient have another anomaly or another study condition?                      |                 |         |         |           |          |        |         |
| No                                                                                     | 202             | 38      | 19%     | Reference | -        | -      | -       |
| Yes                                                                                    | 246             | 98      | 40%     | 2.12      | 1.53     | 2.93   | <0.001  |
| Antenatal diagnosis?                                                                   |                 |         |         |           |          |        |         |
| No: either no ultrasound or ultrasound with no problem identified                      | 235             | 59      | 25%     | Reference | -        | -      | -       |
| Yes: study condition diagnosed or problem identified                                   | 211             | 77      | 36%     | 1.45      | 1.09     | 1.93   | 0.01    |
| Distance from the patients home to the study centre (km):                              | 448             | -       | -       | 0.998     | 0.996    | 0.999  | 0.01    |
| Born at the study centre?                                                              |                 |         |         |           |          |        |         |
| No                                                                                     | 282             | 74      | 26%     | Reference | -        | -      | -       |
| Yes                                                                                    | 165             | 62      | 38%     | 1.43      | 1.08     | 1.89   | 0.01    |
| Type of delivery:                                                                      |                 |         |         |           |          |        |         |
| Vaginal (spontaneous)                                                                  | 190             | 51      | 27%     | Reference | -        | -      | -       |
| Vaginal (induced)                                                                      | 33              | 6       | 18%     | 0.68      | 0.32     | 1.45   | 0.32    |
| Caesarean section (elective)                                                           | 123             | 42      | 34%     | 1.27      | 0.91     | 1.79   | 0.16    |
| Caesarean section (urgent/non-elective)                                                | 92              | 37      | 40%     | 1.5       | 1.06     | 2.11   | 0.02    |
| Was the patient septic on arrival to your hospital?                                    |                 |         |         |           |          |        |         |
| No                                                                                     | 372             | 97      | 26%     | Reference | -        | -      | -       |
| Yes                                                                                    | 74              | 39      | 52%     | 2.02      | 1.53     | 2.66   | <0.001  |
| Was the patient hypothermic and/or hypovolaemic on arrival to your hospital?           |                 |         |         |           |          |        |         |
| No                                                                                     | 363             | 94      | 26%     | Reference | -        | -      | -       |
| Yes                                                                                    | 85              | 42      | 49%     | 1.91      | 1.45     | 2.52   | <0.001  |
| Did the patient receive an umbilical vein catheter?                                    |                 |         |         |           |          |        |         |
| No                                                                                     | 293             | 74      | 25%     | Reference | -        | -      | -       |
| Yes                                                                                    | 155             | 62      | 40%     | 1.58      | 1.20     | 2.09   | 0.001   |
| Did the patient receive a peripherally inserted central catheter (PICC)?               |                 |         |         |           |          |        |         |
| No                                                                                     | 309             | 108     | 35%     | Reference | -        | -      | -       |
| Yes                                                                                    | 139             | 28      | 20%     | 0.58      | 0.40     | 0.83   | 0.003   |
| Did the patient receive a percutaneously inserted direct central line?                 |                 |         |         |           |          |        |         |
| No                                                                                     | 371             | 123     | 33%     | Reference | -        | -      | -       |
| Yes                                                                                    | 77              | 13      | 17%     | 0.51      | 0.30     | 0.85   | 0.01    |
| Did the patient receive a surgically placed direct central line?                       |                 |         |         |           |          |        |         |
| No                                                                                     | 419             | 129     | 31%     | Reference | -        | -      | -       |
| Yes                                                                                    | 29              | 7       | 24%     | 0.78      | 0.40     | 1.52   | 0.47    |
| Time from arrival at study centre to primary intervention (hours)                      | 364             | -       | -       | 0.997     | 0.994    | 0.999  | 0.03    |
| American Society of Anesthesiologists (ASA) Score at the time of primary intervention: |                 |         |         |           |          |        |         |
| 1 or 2                                                                                 | 114             | 9       | 8%      | Reference | -        | -      | -       |
| 3                                                                                      | 148             | 34      | 23%     | 2.91      | 1.45     | 5.82   | 0.003   |
| 4 or 5                                                                                 | 119             | 39      | 33%     | 4.15      | 2.11     | 8.18   | <0.001  |
| N/A: no intervention*                                                                  | 66              | 54      | 82%     | 10.36     | 5.48     | 19.61  | <0.001  |
| What type of anaesthesia was used for the primary intervention? †                      |                 |         |         |           |          |        |         |
| General anaesthesia with endotracheal tube or laryngeal airway                         | 366             | 65      | 18%     | Reference | -        | -      | -       |
| No general anaesthesia                                                                 | 3               | 1       | 33%     | 1.88      | 0.37     | 9.46   | 0.45    |
| N/A: no surgery or primary intervention undertaken.                                    | 79              | 70      | 89%     | 4.99      | 3.95     | 6.30   | <0.001  |
| Who undertook the anaesthetic for the primary intervention? †                          |                 |         |         |           |          |        |         |
| Anaesthetic doctor                                                                     | 367             | 65      | 18%     | Reference | -        | -      | -       |
| Non-doctor anaesthetist                                                                | 1               | 0       | 0%      | 0.00003   | 3.72e-0  | 0.0002 | <0.001  |
| No anaesthetic undertaken                                                              | 80              | 71      | 89%     | 5.01      | 3.96     | 6.33   | <0.001  |
| Who undertook the primary intervention? †                                              |                 |         |         |           |          |        |         |
| Paediatric surgeon (or junior with paediatric surgeon assisting/ in the room)          | 368             | 66      | 18%     | Reference | -        | -      | -       |
| Non-paediatric surgeon                                                                 | 1               | 0       | 0%      | 0.00003   | 3.70e-06 | 0.0002 | <0.001  |
| N/A: no surgery or primary intervention undertaken                                     | 79              | 70      | 89%     | 4.94      | 3.91     | 6.23   | <0.001  |
| Was a Surgical Safety Checklist used at the time of primary intervention?              |                 |         |         |           |          |        |         |
| Yes                                                                                    | 304             | 50      | 16%     | Reference | -        | -      | -       |
| No                                                                                     | 63              | 18      | 29%     | 1.74      | 1.09     | 2.77   | 0.02    |
| N/A: a conservative primary intervention or no surgery undertaken *                    | 80              | 68      | 85%     | 5.17      | 3.95     | 6.77   | <0.001  |
| Total duration of antibiotics following primary intervention (days):                   | 443             | -       | -       | 0.92      | 0.89     | 0.96   | <0.001  |
| Did the patient receive a blood transfusion?                                           |                 |         |         |           |          |        |         |
| No: not required                                                                       | 253             | 72      | 28%     | Reference | -        | -      | -       |
| Yes: cross-matched OR not cross-matched                                                | 185             | 59      | 32%     | 1.12      | 0.84     | 1.49   | 0.44    |
| No: it was required but not available ‡                                                | 9               | 5       | 56%     | 1.95      | 1.05     | 3.62   | 0.03    |
| Did the patient require ventilation?                                                   |                 |         |         |           |          |        |         |
| No                                                                                     | 58              | 5       | 9%      | Reference | -        | -      | -       |
| Yes and it was given                                                                   | 387             | 128     | 33%     | 3.84      | 1.64     | 8.98   | 0.002   |

|                                                                     |     |     |      |           |          |         |        |
|---------------------------------------------------------------------|-----|-----|------|-----------|----------|---------|--------|
| Yes, but it was not available ‡                                     | 3   | 3   | 100% | 11·6      | 5·01     | 26·84   | <0·001 |
| Did the patient require parenteral nutrition?                       |     |     |      |           |          |         |        |
| No                                                                  | 146 | 57  | 39%  | Reference | -        | -       | -      |
| Yes and it was given §                                              | 286 | 73  | 26%  | 0·65      | 0·49     | 0·87    | 0·003  |
| Yes and it was sometimes available, but less than required §        | 13  | 3   | 23%  | 0·59      | 0·21     | 1·63    | 0·31   |
| Yes, but it was not available ‡                                     | 3   | 3   | 100% | 2·56      | 2·09     | 3·14    | <0·001 |
| Time to first feed (days): **                                       | 315 | -   | -    | 1·04      | 0·99     | 1·1     | 0·12   |
| Time to full feeds (days): **                                       | 315 | -   | -    | 1·07      | 1·01     | 1·14    | 0·02   |
| Duration of hospital stay (days): ***                               | 398 | -   | -    | 0·89      | 0·87     | 0·91    | <0·001 |
| Did the patient have a surgical site infection?                     |     |     |      |           |          |         |        |
| No                                                                  | 346 | 66  | 19%  | Reference | -        | -       | -      |
| Yes                                                                 | 25  | 2   | 8%   | 0·42      | 0·11     | 1·62    | 0·21   |
| N/A: no surgical wound *                                            | 77  | 68  | 88%  | 4·63      | 3·67     | 5·84    | <0·001 |
| Did the patient have a full thickness wound dehiscence? †           |     |     |      |           |          |         |        |
| No                                                                  | 366 | 65  | 18%  | Reference | -        | -       | -      |
| Yes                                                                 | 2   | 0   | 0%   | 5·95e-06  | 1·46e-06 | 0·00002 | <0·001 |
| N/A: no surgical wound                                              | 80  | 71  | 89%  | 0·17      | 3·95     | 6·31    | <0·001 |
| Did the patient require a further unplanned intervention?           |     |     |      |           |          |         |        |
| No                                                                  | 335 | 58  | 17%  | Reference | -        | -       | -      |
| Yes - percutaneous or surgical intervention                         | 39  | 13  | 33%  | 1·93      | 1·17     | 3·18    | 0·01   |
| N/A: no primary intervention undertaken *                           | 74  | 65  | 88%  | 5·07      | 3·95     | 6·51    | <0·001 |
| Country income status:                                              |     |     |      |           |          |         |        |
| HIC                                                                 | 148 | 21  | 14%  | Reference | -        | -       | -      |
| MIC §                                                               | 299 | 115 | 38%  | 2·71      | 1·78     | 4·13    | <0·001 |
| LIC §                                                               | 1   | 0   | 0%   | 9·60e-06  | 1·30e-06 | 0·00007 | <0·001 |
| <b>Condition specific variables</b>                                 |     |     |      |           |          |         |        |
| Type of CDH                                                         |     |     |      |           |          |         |        |
| Left posteriolateral (Bochdalek)                                    | 316 | 104 | 33%  | reference | -        | -       | -      |
| Right posteriolateral (Bochdalek)                                   | 69  | 18  | 26%  | 0·79      | 0·52     | 1·22    | 0·29   |
| Other                                                               | 63  | 14  | 22%  | 0·68      | 0·41     | 1·10    | 0·12   |
| Liver position?                                                     |     |     |      |           |          |         |        |
| Abdomen                                                             | 284 | 69  | 24%  | reference | -        | -       | -      |
| Chest                                                               | 124 | 38  | 31%  | 1·26      | 0·90     | 1·76    | 0·18   |
| Unknown                                                             | 40  | 29  | 73%  | 2·98      | 2·25     | 3·95    | <0·001 |
| Did the patient have pulmonary hypertension (at any stage)?         |     |     |      |           |          |         |        |
| No                                                                  | 152 | 12  | 8%   | reference | -        | -       | -      |
| Yes                                                                 | 259 | 109 | 42%  | 5·33      | 3·04     | 9·35    | <0·001 |
| Unknown or missing                                                  | 36  | 15  | 42%  | 5·28      | 2·71     | 10·29   | <0·001 |
| Primary intervention:                                               |     |     |      |           |          |         |        |
| Primary repair (absorbable sutures)                                 | 43  | 6   | 20%  | reference | -        | -       | -      |
| Primary repair (non-absorbable sutures)                             | 254 | 42  | 17%  | 1·19      | 0·54     | 2·62    | 0·68   |
| Patch repair                                                        | 66  | 16  | 24%  | 1·74      | 0·74     | 4·09    | 0·21   |
| Palliation *                                                        | 68  | 65  | 96%  | 6·85      | 3·25     | 14·4    | <0·001 |
| Surgical approach: **                                               |     |     |      |           |          |         |        |
| Laparotomy or thoracotomy                                           | 289 | 60  | 21%  | reference | -        | -       | -      |
| Laparoscopy or thoracoscopy                                         | 70  | 3   | 4%   | 0·20      | 0·07     | 0·64    | 0·006  |
| N/A, no surgical intervention (n=88) or other approach (n=1)        | 89  | 73  | 82%  | 3·95      | 3·09     | 5·05    | <0·001 |
| Did the patient receive extracorporeal membrane oxygenation (ECMO)? |     |     |      |           |          |         |        |
| No                                                                  | 420 | 126 | 30%  | reference | -        | -       | -      |
| Yes                                                                 | 28  | 10  | 36%  | 1·19      | 0·71     | 2·00    | 0·51   |

\*N/A groups were not presented on the forest plots. †Excluded from the multivariable analysis due to low or no counts and inability to collapse categories. ‡Excluded from multivariable analysis due to low counts and inability to combine with another category. §Category collapsed for the multivariable analysis due to low counts. \*\*Excluded from multivariable analysis as this variable is a sub-group. \*\*\*Excluded from multivariable analysis due to missing data. CDH: Congenital diaphragmatic hernia. CI: Confidence interval. HIC: High-income countries. LIC: Low-income countries. MIC: Middle-income countries. N/A: Not applicable. OA: Oesophageal Atresia. RR: Risk Ratio. TOF: Tracheo-oesophageal fistula.

**Supplementary Table 13: Univariable analysis of factors affecting mortality for patients with intestinal atresia**

| Generic variables                                                                      | N (total = 681) | Died, N | Died, % | RR        | 95% CI   |         | P value          |
|----------------------------------------------------------------------------------------|-----------------|---------|---------|-----------|----------|---------|------------------|
| Sex:                                                                                   |                 |         |         |           |          |         |                  |
| Male                                                                                   | 336             | 59      | 18%     | Reference | -        | -       | -                |
| Female                                                                                 | 343             | 66      | 19%     | 1.09      | 0.79     | 1.50    | 0.57             |
| Ambiguous *                                                                            | 2               | 1       | 50      | 2.84      | 0.69     | 11.61   | 0.14             |
| Gestational age at birth:                                                              | 676             | -       | -       | 0.95      | 0.90     | 0.99    | <b>0.03</b>      |
| Age at presentation (in hours):                                                        | 680             | -       | -       | 0.99      | 0.99     | 1.00    | 0.15             |
| Weight at presentation (kg):                                                           | 680             | -       | -       | 0.52      | 0.43     | 0.63    | <b>&lt;0.001</b> |
| Does the patient have another anomaly or another study condition?                      |                 |         |         |           |          |         |                  |
| No                                                                                     | 385             | 74      | 19%     | Reference | -        | -       | -                |
| Yes                                                                                    | 296             | 52      | 18%     | 0.91      | 0.66     | 1.25    | 0.58             |
| Antenatal diagnosis?                                                                   |                 |         |         |           |          |         |                  |
| No: either no ultrasound or ultrasound with no problem identified                      | 349             | 76      | 22%     | Reference | -        | -       | -                |
| Yes: study condition diagnosed or problem identified                                   | 330             | 50      | 15%     | 0.69      | 0.50     | 0.96    | <b>0.02</b>      |
| Distance from the patients home to the study centre (km):                              | 681             | -       | -       | 1.00      | 0.99     | 1.00    | 0.52             |
| Born at the study centre?                                                              |                 |         |         |           |          |         |                  |
| No                                                                                     | 465             | 105     | 23%     | Reference | -        | -       | -                |
| Yes                                                                                    | 214             | 21      | 10%     | 0.43      | 0.27     | 0.67    | <b>&lt;0.001</b> |
| Type of delivery:                                                                      |                 |         |         |           |          |         |                  |
| Vaginal (spontaneous)                                                                  | 333             | 71      | 21%     | Reference | -        | -       | -                |
| Vaginal (induced)                                                                      | 20              | 1       | 5%      | 0.23      | 0.03     | 1.60    | 0.13             |
| Caesarean section (elective)                                                           | 145             | 29      | 20%     | 0.93      | 0.63     | 1.37    | 0.74             |
| Caesarean section (urgent/non-elective)                                                | 181             | 25      | 14%     | 0.64      | 0.42     | 0.98    | <b>0.04</b>      |
| Was the patient septic on arrival to your hospital?                                    |                 |         |         |           |          |         |                  |
| No                                                                                     | 540             | 70      | 13%     | Reference | -        | -       | -                |
| Yes                                                                                    | 141             | 56      | 40%     | 3.06      | 2.27     | 4.13    | <b>&lt;0.001</b> |
| Was the patient hypothermic and/or hypovolaemic on arrival to your hospital?           |                 |         |         |           |          |         |                  |
| No                                                                                     | 509             | 69      | 14%     | Reference | -        | -       | -                |
| Yes                                                                                    | 172             | 57      | 33%     | 2.44      | 1.80     | 3.31    | <b>&lt;0.001</b> |
| Did the patient receive an umbilical vein catheter?                                    |                 |         |         |           |          |         |                  |
| No                                                                                     | 612             | 113     | 18%     | Reference | -        | -       | -                |
| Yes                                                                                    | 69              | 13      | 19%     | 1.02      | 0.60     | 1.71    | 0.93             |
| Did the patient receive a peripherally inserted central catheter (PICC)?               |                 |         |         |           |          |         |                  |
| No                                                                                     | 413             | 103     | 25%     | Reference | -        | -       | -                |
| Yes                                                                                    | 268             | 23      | 9%      | 0.34      | 0.22     | 0.52    | <b>&lt;0.001</b> |
| Did the patient receive a percutaneously inserted direct central line?                 |                 |         |         |           |          |         |                  |
| No                                                                                     | 575             | 120     | 21%     | Reference | -        | -       | -                |
| Yes                                                                                    | 106             | 6       | 6%      | 0.27      | 0.12     | 0.59    | <b>0.001</b>     |
| Did the patient receive a surgically placed direct central line?                       |                 |         |         |           |          |         |                  |
| No                                                                                     | 621             | 109     | 18%     | Reference | -        | -       | -                |
| Yes                                                                                    | 60              | 17      | 28%     | 1.61      | 1.04     | 2.49    | <b>0.03</b>      |
| Time from arrival at study centre to primary intervention (hours) †                    | 643             | -       | 0%      | 1.001     | 1.0003   | 1.0026  | <b>0.008</b>     |
| American Society of Anesthesiologists (ASA) Score at the time of primary intervention: |                 |         |         |           |          |         |                  |
| 1 or 2                                                                                 | 319             | 39      | 12%     | Reference | -        | -       | -                |
| 3                                                                                      | 239             | 41      | 17%     | 1.40      | 0.93     | 2.10    | 0.1              |
| 4 or 5                                                                                 | 97              | 30      | 31%     | 2.52      | 1.66     | 3.84    | <b>&lt;0.001</b> |
| N/A: no intervention ‡                                                                 | 24              | 16      | 67%     | 5.45      | 3.62     | 8.20    | <b>&lt;0.001</b> |
| What type of anaesthesia was used for the primary intervention? §                      |                 |         |         |           |          |         |                  |
| General anaesthesia with endotracheal tube or laryngeal airway                         | 659             | 112     | 17%     | Reference | -        | -       | -                |
| No general anaesthesia                                                                 | 5               | 0       | 0%      | 4.51e-06  | 1.84e-06 | 0.00001 | <b>&lt;0.001</b> |
| N/A: no surgery or primary intervention undertaken.                                    | 17              | 14      | 82%     | 4.84      | 3.67     | 6.39    | <b>&lt;0.001</b> |
| Who undertook the anaesthetic for the primary intervention?                            |                 |         |         |           |          |         |                  |
| Anaesthetic doctor                                                                     | 646             | 107     | 17%     | Reference | -        | -       | -                |
| Non-doctor anaesthetist                                                                | 15              | 5       | 33%     | 2.01      | 0.96     | 4.20    | 0.06             |
| No anaesthetic undertaken ‡                                                            | 20              | 14      | 70%     | 4.22      | 3.02     | 5.90    | <b>&lt;0.001</b> |
| Who undertook the primary intervention?                                                |                 |         |         |           |          |         |                  |
| Paediatric surgeon (or junior with paediatric surgeon assisting/ in the room)          | 654             | 110     | 17%     | Reference | -        | -       | -                |
| Non-paediatric surgeon                                                                 | 11              | 3       | 27%     | 1.62      | 0.60     | 4.32    | 0.33             |
| N/A: no surgery or primary intervention undertaken ‡                                   | 16              | 13      | 81%     | 4.83      | 3.61     | 6.46    | <b>&lt;0.001</b> |
| Was a Surgical Safety Checklist used at the time of primary intervention?              |                 |         |         |           |          |         |                  |
| Yes                                                                                    | 530             | 59      | 11%     | Reference | -        | -       | -                |
| No                                                                                     | 134             | 55      | 41%     | 3.68      | 2.69     | 5.05    | <b>&lt;0.001</b> |
| N/A: a conservative primary intervention was undertaken / no surgery undertaken        | 17              | 12      | 71%     | 6.34      | 4.29     | 9.36    | <b>&lt;0.001</b> |
| Total duration of antibiotics following primary intervention (days): †                 | 671             | -       | -       | 0.97      | 0.95     | 1.002   | 0.07             |
| Did the patient receive a blood transfusion?                                           |                 |         |         |           |          |         |                  |
| No: not required                                                                       | 322             | 32      | 10%     | Reference | -        | -       | -                |
| Yes: cross-matched OR not cross-matched                                                | 354             | 93      | 26%     | 2.64      | 1.82     | 3.83    | <b>&lt;0.001</b> |
| No: it was required but not available *                                                | 5               | 1       | 20%     | 2.01      | 0.33     | 11.99   | 0.44             |
| Did the patient require ventilation?                                                   |                 |         |         |           |          |         |                  |
| No                                                                                     | 290             | 60      | 21%     | Reference | -        | -       | -                |

|                                                                          |     |     |     |           |      |       |                  |
|--------------------------------------------------------------------------|-----|-----|-----|-----------|------|-------|------------------|
| Yes and it was given                                                     | 370 | 49  | 13% | 0.64      | 0.45 | 0.90  | <b>0.01</b>      |
| Yes, but it was not available                                            | 21  | 17  | 81% | 3.91      | 2.87 | 5.31  | <b>&lt;0.001</b> |
| Did the patient require parenteral nutrition?                            |     |     |     |           |      |       |                  |
| No                                                                       | 106 | 30  | 28% | Reference | -    | -     | -                |
| Yes and it was given                                                     | 490 | 46  | 9%  | 0.33      | 0.22 | 0.49  | <b>&lt;0.001</b> |
| Yes and it was sometimes available, but less than required               | 37  | 19  | 51% | 1.81      | 1.17 | 2.80  | <b>0.007</b>     |
| Yes, but it was not available                                            | 48  | 31  | 65% | 2.28      | 1.57 | 3.29  | <b>&lt;0.001</b> |
| Time to first feed (days): †                                             | 575 | -   | -   | 0.99      | 0.94 | 1.04  | 0.72             |
| Time to full feeds (days): †                                             | 544 | -   | -   | 1.00      | 0.94 | 1.07  | 0.86             |
| Duration of hospital stay (days): **                                     | 603 | -   | -   | 0.91      | 0.89 | 0.93  | <b>&lt;0.001</b> |
| Did the patient have a surgical site infection?                          |     |     |     |           |      |       |                  |
| No                                                                       | 586 | 94  | 16% | Reference | -    | -     | -                |
| Yes                                                                      | 71  | 17  | 24% | 1.49      | 0.94 | 2.35  | 0.08             |
| N/A: no surgical wound ‡                                                 | 24  | 15  | 63% | 3.89      | 2.71 | 5.59  | <b>&lt;0.001</b> |
| Did the patient have a full thickness wound dehiscence?                  |     |     |     |           |      |       |                  |
| No                                                                       | 639 | 106 | 17% | Reference | -    | -     | -                |
| Yes                                                                      | 17  | 5   | 29% | 1.77      | 0.83 | 3.78  | 0.13             |
| N/A: no surgical wound ‡                                                 | 25  | 15  | 60% | 3.61      | 2.51 | 5.20  | <b>&lt;0.001</b> |
| Did the patient require a further unplanned intervention?                |     |     |     |           |      |       |                  |
| No                                                                       | 552 | 81  | 15% | Reference | -    | -     | -                |
| Yes - percutaneous or surgical intervention                              | 107 | 29  | 27% | 1.84      | 1.27 | 2.67  | <b>0.001</b>     |
| N/A: no primary intervention undertaken ‡                                | 22  | 16  | 73% | 4.95      | 3.57 | 6.86  | <b>&lt;0.001</b> |
| Country income status:                                                   |     |     |     |           |      |       |                  |
| HIC                                                                      | 152 | 5   | 3%  | Reference | -    | -     | -                |
| MIC ***                                                                  | 509 | 109 | 21% | 6.51      | 2.70 | 15.67 | <b>&lt;0.001</b> |
| LIC ***                                                                  | 20  | 12  | 60% | 18.24     | 7.16 | 46.41 | <b>&lt;0.001</b> |
| <b>Condition specific variables</b>                                      |     |     |     |           |      |       |                  |
| Type of intestinal atresia?                                              |     |     |     |           |      |       |                  |
| Duodenal                                                                 | 279 | 44  | 16% | reference | -    | -     | -                |
| Jejunio-ileal                                                            | 369 | 77  | 21% | 1.32      | 0.95 | 1.85  | 0.10             |
| Colonic                                                                  | 31  | 5   | 16% | 1.02      | 0.44 | 2.39  | 0.96             |
| Surgical approach: †                                                     |     |     |     |           |      |       |                  |
| Laparotomy                                                               | 550 | 98  | 18% | reference | -    | -     | -                |
| Laparoscopy or endoscopy                                                 | 36  | 1   | 3%  | 0.16      | 0.02 | 1.09  | 0.06             |
| Was the distal bowel flushed to check for patency?                       |     |     |     |           |      |       |                  |
| No                                                                       | 89  | 12  | 14% | reference | -    | -     | -                |
| Yes                                                                      | 442 | 72  | 16% | 1.21      | 0.68 | 2.13  | 0.51             |
| N/A ‡                                                                    | 150 | 42  | 28% | 2.08      | 1.16 | 3.73  | <b>0.02</b>      |
| Condition specific complications within 30-days of primary intervention: |     |     |     |           |      |       |                  |
| Anastomotic leak                                                         |     |     |     |           |      |       |                  |
| No                                                                       | 624 | 93  | 15% | reference | -    | -     | -                |
| Yes                                                                      | 57  | 33  | 58% | 3.88      | 2.91 | 5.19  | <b>&lt;0.001</b> |
| Anastomotic stenosis                                                     |     |     |     |           |      |       |                  |
| No                                                                       | 662 | 122 | 18% | reference | -    | -     | -                |
| Yes                                                                      | 19  | 4   | 21% | 1.14      | 0.47 | 2.77  | 0.77             |
| Short-gut                                                                |     |     |     |           |      |       |                  |
| No                                                                       | 655 | 116 | 18% | reference | -    | -     | -                |
| Yes                                                                      | 26  | 10  | 39% | 2.17      | 1.30 | 3.63  | <b>0.003</b>     |
| Adhesive bowel obstruction                                               |     |     |     |           |      |       |                  |
| No                                                                       | 658 | 123 | 19% | reference | -    | -     | -                |
| Yes                                                                      | 23  | 3   | 13% | 0.70      | 0.24 | 2.03  | 0.51             |

\*Excluded from multivariable analysis due to low counts and inability to combine with another category. †Excluded from multivariable analysis as this variable is a sub-group. ‡N/A groups were not presented on the forest plots. §Excluded from the multivariable analysis due to low or no counts and inability to collapse categories. \*\*Excluded from multivariable analysis due to missing data. \*\*\*Category collapsed for the multivariable analysis due to low counts. CI: Confidence interval. HIC: High-income countries. LIC: Low-income countries. MIC: Middle-income countries. N/A: Not applicable. RR: Risk Ratio.

**Supplementary Table 14: Univariable analysis of factors affecting mortality for patients with gastroschisis**

| Generic variables                                                                      | N (total =453) | Died, N | Died, % | RR        | 95% CI |       | P value          |
|----------------------------------------------------------------------------------------|----------------|---------|---------|-----------|--------|-------|------------------|
| Sex:                                                                                   |                |         |         |           |        |       |                  |
| Male                                                                                   | 232            | 55      | 24%     | Reference | -      | -     | -                |
| Female                                                                                 | 221            | 53      | 24%     | 1.01      | 0.72   | 1.40  | 0.94             |
| Gestational age at birth:                                                              | 451            | -       | -       | 1.06      | 0.96   | 1.17  | 0.19             |
| Age at presentation (in hours):                                                        | 453            | -       | -       | 0.99      | 0.99   | 1.00  | 0.15             |
| Weight at presentation (kg):                                                           | 452            | -       | -       | 0.55      | 0.38   | 0.77  | <b>0.001</b>     |
| Does the patient have another anomaly or another study condition?                      |                |         |         |           |        |       |                  |
| No                                                                                     | 325            | 77      | 24%     | Reference | -      | -     | -                |
| Yes                                                                                    | 128            | 31      | 24%     | 1.02      | 0.71   | 1.47  | 0.90             |
| Antenatal diagnosis?                                                                   |                |         |         |           |        |       |                  |
| No: either no ultrasound or ultrasound with no problem identified                      | 155            | 76      | 49%     | Reference | -      | -     | -                |
| Yes: study condition diagnosed or problem identified                                   | 298            | 32      | 11%     | 0.21      | 0.15   | 0.31  | <b>&lt;0.001</b> |
| Distance from the patients home to the study centre (km):                              | 453            | -       | -       | 1.00      | 0.99   | 1.00  | 0.24             |
| Born at the study centre?                                                              |                |         |         |           |        |       |                  |
| No                                                                                     | 209            | 88      | 42%     | Reference | -      | -     | -                |
| Yes                                                                                    | 244            | 20      | 8%      | 0.19      | 0.12   | 0.30  | <b>&lt;0.001</b> |
| Type of delivery:                                                                      |                |         |         |           |        |       |                  |
| Vaginal (spontaneous)                                                                  | 176            | 68      | 39%     | Reference | -      | -     | -                |
| Vaginal (induced)                                                                      | 26             | 1       | 4%      | 0.09      | 0.01   | 0.68  | <b>0.02</b>      |
| Caesarean section (elective)                                                           | 123            | 18      | 15%     | 0.37      | 0.23   | 0.60  | <b>&lt;0.001</b> |
| Caesarean section (urgent/non-elective)                                                | 128            | 21      | 16%     | 0.42      | 0.27   | 0.65  | <b>&lt;0.001</b> |
| Was the patient septic on arrival to your hospital?                                    |                |         |         |           |        |       |                  |
| No                                                                                     | 390            | 68      | 17%     | Reference | -      | -     | -                |
| Yes                                                                                    | 62             | 40      | 65%     | 3.70      | 2.78   | 4.91  | <b>&lt;0.001</b> |
| Was the patient hypothermic and/or hypovolaemic on arrival to your hospital?           |                |         |         |           |        |       |                  |
| No                                                                                     | 324            | 47      | 15%     | Reference | -      | -     | -                |
| Yes                                                                                    | 129            | 61      | 47%     | 3.25      | 2.36   | 4.49  | <b>&lt;0.001</b> |
| Did the patient receive an umbilical vein catheter? *                                  |                |         |         |           |        |       |                  |
| No                                                                                     | 439            | 103     | 23%     | Reference | -      | -     | -                |
| Yes                                                                                    | 14             | 5       | 36%     | 1.52      | 0.73   | 3.13  | 0.25             |
| Did the patient receive a peripherally inserted central catheter (PICC)?               |                |         |         |           |        |       |                  |
| No                                                                                     | 222            | 88      | 40%     | Reference | -      | -     | -                |
| Yes                                                                                    | 231            | 20      | 9%      | 0.21      | 0.13   | 0.34  | <b>&lt;0.001</b> |
| Did the patient receive a percutaneously inserted direct central line?                 |                |         |         |           |        |       |                  |
| No                                                                                     | 383            | 102     | 27%     | Reference | -      | -     | -                |
| Yes                                                                                    | 70             | 6       | 9%      | 0.32      | 0.14   | 0.70  | <b>0.005</b>     |
| Did the patient receive a surgically placed direct central line?                       |                |         |         |           |        |       |                  |
| No                                                                                     | 387            | 96      | 25%     | Reference | -      | -     | -                |
| Yes                                                                                    | 66             | 12      | 18%     | 0.73      | 0.42   | 1.25  | 0.26             |
| Time from arrival at study centre to primary intervention (hours) †                    | 415            |         | 0%      | 1.004     | 1.0001 | 1.009 | <b>0.04</b>      |
| American Society of Anesthesiologists (ASA) Score at the time of primary intervention: |                |         |         |           |        |       |                  |
| 1 or 2                                                                                 | 188            | 28      | 15%     | Reference | -      | -     | -                |
| 3                                                                                      | 172            | 33      | 19%     | 1.28      | 0.81   | 2.03  | 0.28             |
| 4 or 5                                                                                 | 63             | 36      | 57%     | 3.83      | 2.56   | 5.74  | <b>0.002</b>     |
| N/A: no intervention                                                                   | 30             | 11      | 37%     | 2.46      | 1.37   | 4.40  | <b>&lt;0.001</b> |
| What type of anaesthesia was used for the primary intervention?                        |                |         |         |           |        |       |                  |
| General anaesthesia with endotracheal tube or laryngeal airway                         | 362            | 76      | 21%     | Reference | -      | -     | -                |
| No general anaesthesia                                                                 | 72             | 19      | 26%     | 1.25      |        |       | 0.30             |
| N/A: no surgery or primary intervention undertaken ‡                                   | 19             | 13      | 68%     | 3.25      |        |       | <b>&lt;0.001</b> |
| Who undertook the anaesthetic for the primary intervention?                            |                |         |         |           |        |       |                  |
| Anaesthetic doctor                                                                     | 337            | 75      | 22%     | Reference | -      | -     | -                |
| Non-doctor anaesthetist                                                                | 54             | 10      | 19%     | 0.83      | 0.45   | 1.50  | 0.54             |
| No anaesthetic undertaken ‡                                                            | 62             | 23      | 37%     | 1.66      | 1.13   | 2.44  | <b>0.009</b>     |
| Who undertook the primary intervention? *                                              |                |         |         |           |        |       |                  |
| Paediatric surgeon (or junior with paediatric surgeon assisting/ in the room)          | 423            | 90      | 21%     | Reference | -      | -     | -                |
| Non-paediatric surgeon                                                                 | 17             | 6       | 35%     | 1.65      | 0.84   | 3.24  | 0.13             |
| N/A: no surgery or primary intervention undertaken                                     | 13             | 12      | 92%     | 4.33      | 3.40   | 5.52  | <b>&lt;0.001</b> |
| Was a Surgical Safety Checklist used at the time of primary intervention?              |                |         |         |           |        |       |                  |
| Yes                                                                                    | 304            | 43      | 14%     | Reference | -      | -     | -                |
| No                                                                                     | 92             | 47      | 51%     | 3.61      | 2.56   | 5.08  | <b>&lt;0.001</b> |
| N/A: a conservative primary intervention or no surgery undertaken ‡                    | 57             | 18      | 32%     | 2.23      | 1.39   | 3.58  | <b>0.001</b>     |
| Total duration of antibiotics following primary intervention (days): †                 | 447            | -       | -       | 0.91      | 0.88   | 0.95  | <b>&lt;0.001</b> |
| Did the patient receive a blood transfusion?                                           |                |         |         |           |        |       |                  |
| No: not required                                                                       | 254            | 42      | 17%     | Reference | -      | -     | -                |
| Yes: cross-matched OR not cross-matched                                                | 190            | 62      | 33%     | 1.97      | 1.39   | 2.78  | <b>&lt;0.001</b> |
| No: it was required but not available §                                                | 9              | 4       | 44%     | 2.68      | 1.22   | 5.87  | <b>0.01</b>      |
| Did the patient require ventilation?                                                   |                |         |         |           |        |       |                  |
| No                                                                                     | 82             | 30      | 36%     | Reference | -      | -     | -                |
| Yes and it was given                                                                   | 342            | 52      | 15%     | 0.41      | 0.28   | 0.60  | <b>&lt;0.001</b> |
| Yes, but it was not available                                                          | 29             | 26      | 90%     | 2.45      | 1.79   | 3.34  | <b>&lt;0.001</b> |



|                                                                                         |     |     |     |           |       |        |   |        |
|-----------------------------------------------------------------------------------------|-----|-----|-----|-----------|-------|--------|---|--------|
| Did the patient require parenteral nutrition?                                           |     |     |     |           |       |        |   |        |
| No                                                                                      | 55  | 41  | 75% | Reference | -     | -      | - | -      |
| Yes and it was given                                                                    | 351 | 31  | 9%  | 0.11      | 0.08  | 0.17   |   | <0.001 |
| Yes and it was sometimes available, but less than required                              | 21  | 15  | 71% | 0.95      | 0.70  | 1.30   |   | 0.78   |
| Yes, but it was not available                                                           | 26  | 21  | 81% | 1.08      | 0.84  | 1.38   |   | 0.51   |
| Time to first feed (days): †                                                            | 326 | -   | -   | 1.01      | 0.95  | 1.07   |   | 0.69   |
| Time to full feeds (days): †                                                            | 328 | -   | -   | 1.03      | 0.92  | 1.14   |   | 0.56   |
| Duration of hospital stay (days): **                                                    | 384 | -   | -   | 0.89      | 0.87  | 0.90   |   | <0.001 |
| Did the patient have a surgical site infection?                                         |     |     |     |           |       |        |   |        |
| No                                                                                      | 368 | 73  | 20% | Reference | -     | -      | - | -      |
| Yes                                                                                     | 51  | 13  | 25% | 1.28      | 0.76  | 2.14   |   | 0.33   |
| N/A: no surgical wound ‡                                                                | 34  | 22  | 65% | 3.26      | 2.36  | 4.50   |   | <0.001 |
| Did the patient have a full thickness wound dehiscence?                                 |     |     |     |           |       |        |   |        |
| No                                                                                      | 399 | 79  | 20% | Reference | -     | -      | - | -      |
| Yes                                                                                     | 21  | 6   | 29% | 1.44      | 0.71  | 2.92   |   | 0.30   |
| N/A: no surgical wound ‡                                                                | 33  | 23  | 70% | 3.52      | 2.60  | 4.75   |   | <0.001 |
| Did the patient require a further unplanned intervention?                               |     |     |     |           |       |        |   |        |
| No                                                                                      | 371 | 78  | 21% | Reference | -     | -      | - | -      |
| Yes - percutaneous or surgical intervention                                             | 63  | 15  | 24% | 1.13      | 0.69  | 1.83   |   | 0.61   |
| N/A: no primary intervention undertaken ‡                                               | 19  | 15  | 79% | 3.75      | 2.76  | 5.09   |   | <0.001 |
| Country income status:                                                                  |     |     |     |           |       |        |   |        |
| HIC                                                                                     | 139 | 2   | 1%  | Reference | -     | -      | - | -      |
| MIC ***                                                                                 | 304 | 97  | 32% | 22.17     | 5.53  | 88.78  |   | <0.001 |
| LIC ***                                                                                 | 10  | 9   | 90% | 62.55     | 15.53 | 251.84 |   | <0.001 |
| <b>Condition specific variables</b>                                                     |     |     |     |           |       |        |   |        |
| Type of Gastroschisis?                                                                  |     |     |     |           |       |        |   |        |
| Simple                                                                                  | 349 | 72  | 21% | reference | -     | -      | - | -      |
| Complex                                                                                 | 104 | 36  | 35% | 1.68      | 1.20  | 2.35   |   | 0.002  |
| Primary intervention: *                                                                 |     |     |     |           |       |        |   |        |
| Primary closure in the operating room (OR)                                              | 166 | 31  | 19% | reference | -     | -      | - | -      |
| Primary closure at the cotside (Bianchi technique)                                      | 32  | 1   | 3%  | 0.17      | 0.02  | 1.18   |   | 0.07   |
| Staged closure using a preformed silo or Alexis Wound Retractor and Protector           | 146 | 29  | 20% | 1.06      | 0.67  | 1.68   |   | 0.79   |
| Staged closure using a surgical silo (including improvised silo)                        | 83  | 34  | 41% | 2.19      | 1.46  | 3.30   |   | <0.001 |
| No intervention undertaken                                                              | 14  | 12  | 86% | 4.60      | 3.13  | 6.73   |   | <0.001 |
| Method of defect closure? *                                                             |     |     |     |           |       |        |   |        |
| Fascia and skin closed with sutures                                                     | 277 | 31  | 11% | reference | -     | -      | - | -      |
| Fascia left open, skin or cord sutured over the defect                                  | 50  | 19  | 38% | 3.40      | 2.09  | 5.52   |   | <0.001 |
| Sutureless closure                                                                      | 66  | 6   | 9%  | 0.81      | 0.35  | 1.87   |   | 0.63   |
| N/A                                                                                     | 50  | 48  | 96% | 8.58      | 6.12  | 12.01  |   | <0.001 |
| Did the neonate have any of these complications within 30-days of primary intervention? |     |     |     |           |       |        |   |        |
| Ischemic bowel                                                                          |     |     |     |           |       |        |   |        |
| No                                                                                      | 427 | 90  | 21% | reference | -     | -      | - | -      |
| Yes                                                                                     | 26  | 18  | 69% | 3.28      | 2.40  | 4.50   |   | <0.001 |
| Abdominal compartment syndrome                                                          |     |     |     |           |       |        |   |        |
| No                                                                                      | 417 | 82  | 20% | reference | -     | -      | - | -      |
| Yes                                                                                     | 36  | 26  | 72% | 3.67      | 2.77  | 4.86   |   | <0.001 |
| Necrotising enterocolitis                                                               |     |     |     |           |       |        |   |        |
| No                                                                                      | 435 | 104 | 24% | reference | -     | -      | - | -      |
| Yes                                                                                     | 18  | 4   | 22% | 0.93      | 0.39  | 2.24   |   | 0.87   |

\*Excluded from the multivariable analysis due to low or no counts and inability to collapse categories. †Excluded from multivariable analysis as this variable is a sub-group. ‡N/A groups were not presented on the forest plots. §Excluded from multivariable analysis due to low counts and inability to combine with another category. \*\*Excluded from multivariable analysis due to missing data. \*\*\*Category collapsed for the multivariable analysis due to low counts. CI: Confidence interval. HIC: High-income countries. LIC: Low-income countries. MIC: Middle-income countries. N/A: Not applicable. RR: Risk Ratio.

**Supplementary Table 15: Univariable analysis of factors affecting mortality for patients with exomphalos/omphalocele**

| Generic variables                                                                      | N (total =325) | Died, N | Died, % | RR        | 95% CI   | P value |
|----------------------------------------------------------------------------------------|----------------|---------|---------|-----------|----------|---------|
| Sex:                                                                                   |                |         |         |           |          |         |
| Male                                                                                   | 183            | 40      | 22%     | Reference | -        | -       |
| Female                                                                                 | 141            | 24      | 17%     | 0.7       | 0.49     | 1.22    |
| Ambiguous *                                                                            | 1              | 1       | 100%    | 4.57      | 3.47     | 6.01    |
| Gestational age at birth:                                                              | 321            | -       | -       | 0.84      | 0.79     | 0.88    |
| Age at presentation (in hours):                                                        | 324            | -       | -       | 0.99      | 0.99     | 1.00    |
| Weight at presentation (kg):                                                           | 325            | -       | -       | 0.42      | 0.32     | 0.55    |
| Does the patient have another anomaly or another study condition?                      |                |         |         |           |          |         |
| No                                                                                     | 133            | 12      | 9%      | Reference | -        | -       |
| Yes                                                                                    | 192            | 53      | 28%     | 3.05      | 1.70     | 5.50    |
| Antenatal diagnosis?                                                                   |                |         |         |           |          |         |
| No: either no ultrasound or ultrasound with no problem identified                      | 143            | 30      | 21%     | Reference | -        | -       |
| Yes: study condition diagnosed or problem identified                                   | 182            | 35      | 19%     | 0.91      | 0.59     | 1.41    |
| Distance from the patients home to the study centre (km):                              | 325            | -       | 0%      | 0.99      | 0.99     | 1.00    |
| Born at the study centre?                                                              |                |         |         |           |          |         |
| No                                                                                     | 214            | 44      | 21%     | Reference | -        | -       |
| Yes                                                                                    | 111            | 21      | 19%     | 0.92      | 0.57     | 1.46    |
| Type of delivery:                                                                      |                |         |         |           |          |         |
| Vaginal (spontaneous)                                                                  | 116            | 30      | 26%     | Reference | -        | -       |
| Vaginal (induced)                                                                      | 12             | 2       | 17%     | 0.64      | 0.17     | 2.37    |
| Caesarean section (elective)                                                           | 130            | 10      | 8%      | 0.29      | 0.15     | 0.58    |
| Caesarean section (urgent/non-elective)                                                | 66             | 22      | 33%     | 1.28      | 0.81     | 2.04    |
| Was the patient septic on arrival to your hospital?                                    |                |         |         |           |          |         |
| No                                                                                     | 285            | 51      | 18%     | Reference | -        | -       |
| Yes                                                                                    | 40             | 14      | 35%     | 1.95      | 0.007    | 1.19    |
| Was the patient hypothermic and/or hypovolaemic on arrival to your hospital?           |                |         |         |           |          |         |
| No                                                                                     | 277            | 46      | 17%     | Reference | -        | -       |
| Yes                                                                                    | 48             | 19      | 40%     | 2.38      | 1.53     | 3.69    |
| Did the patient receive an umbilical vein catheter? †                                  |                |         |         |           |          |         |
| No                                                                                     | 319            | 64      | 20%     | Reference | -        | -       |
| Yes                                                                                    | 6              | 1       | 17%     | 0.83      | 0.13     | 5.05    |
| Did the patient receive a peripherally inserted central catheter (PICC)?               |                |         |         |           |          |         |
| No                                                                                     | 222            | 47      | 21%     | Reference | -        | -       |
| Yes                                                                                    | 103            | 18      | 17%     | 0.82      | 0.44     | 0.50    |
| Did the patient receive a percutaneously inserted direct central line?                 |                |         |         |           |          |         |
| No                                                                                     | 301            | 56      | 19%     | Reference | -        | -       |
| Yes                                                                                    | 24             | 9       | 38%     | 2.01      | 1.14     | 3.56    |
| Did the patient receive a surgically placed direct central line?                       |                |         |         |           |          |         |
| No                                                                                     | 309            | 62      | 20%     | Reference | -        | -       |
| Yes                                                                                    | 16             | 3       | 19%     | 0.93      | 0.32     | 2.65    |
| Time from arrival at study centre to primary intervention (hours) ‡                    | 272            | -       | -       | 0.99      | 0.99     | 1.00    |
| American Society of Anesthesiologists (ASA) Score at the time of primary intervention: |                |         |         |           |          |         |
| 1 or 2                                                                                 | 173            | 12      | 7%      | Reference | -        | -       |
| 3                                                                                      | 72             | 17      | 24%     | 3.40      | 1.71     | 6.76    |
| 4 or 5                                                                                 | 23             | 15      | 65%     | 9.40      | 5.04     | 17.53   |
| N/A: no intervention §                                                                 | 55             | 20      | 36%     | 5.24      | 2.73     | 10.03   |
| What type of anaesthesia was used for the primary intervention?                        |                |         |         |           |          |         |
| General anaesthesia with endotracheal tube or laryngeal airway                         | 200            | 29      | 15%     | Reference | -        | -       |
| No general anaesthesia                                                                 | 59             | 15      | 25%     | 1.75      | 1.00     | 3.04    |
| N/A: no surgery or primary intervention undertaken §                                   | 65             | 21      | 32%     | 2.22      | 1.36     | 3.62    |
| Who undertook the anaesthetic for the primary intervention? †                          |                |         |         |           |          |         |
| Anaesthetic doctor                                                                     | 193            | 27      | 14%     | Reference | -        | -       |
| Non-doctor anaesthetist                                                                | 14             | 6       | 43%     | 3.06      | 1.52     | 6.16    |
| No anaesthetic undertaken                                                              | 117            | 32      | 27%     | 1.95      | 1.23     | 3.09    |
| Who undertook the primary intervention? †                                              |                |         |         |           |          |         |
| Paediatric surgeon (or junior with paediatric surgeon assisting/ in the room)          | 238            | 42      | 18%     | Reference | -        | -       |
| Non-paediatric surgeon                                                                 | 22             | 4       | 18%     | 1.03      | 0.40     | 2.60    |
| N/A: no surgery or primary intervention undertaken                                     | 64             | 19      | 30%     | 1.68      | 1.05     | 2.68    |
| Was a surgical safety checklist used at the time of primary intervention?              |                |         |         |           |          |         |
| Yes                                                                                    | 171            | 22      | 13%     | Reference | -        | -       |
| No                                                                                     | 41             | 13      | 31%     | 2.46      | 1.35     | 4.47    |
| N/A: a conservative primary intervention or no surgery undertaken §                    | 112            | 30      | 27%     | 2.08      | 1.26     | 3.42    |
| Total duration of antibiotics following primary intervention (days): ‡                 | 320            | -       | -       | 0.98      | 0.95     | 1.02    |
| Did the patient receive a blood transfusion?                                           |                |         |         |           |          |         |
| No: not required                                                                       | 233            | 32      | 14%     | Reference | -        | -       |
| Yes: cross-matched OR not cross-matched                                                | 87             | 33      | 38%     | 2.76      | 1.81     | 4.20    |
| No: it was required but not available *                                                | 4              | 0       | 0%      | 4.60e-06  | 1.64e-06 | 0.00001 |
| Did the patient require ventilation?                                                   |                |         |         |           |          |         |
| No                                                                                     | 175            | 20      | 11%     | Reference | -        | -       |
| Yes and it was given                                                                   | 144            | 39      | 27%     | 2.36      | 1.44     | 3.87    |

|                                                            |     |    |      |           |      |       |        |
|------------------------------------------------------------|-----|----|------|-----------|------|-------|--------|
| Yes, but it was not available *                            | 6   | 6  | 100% | 8.75      | 5.78 | 13.22 | <0.001 |
| Did the patient require parenteral nutrition?              |     |    |      |           |      |       |        |
| No                                                         | 158 | 34 | 22%  | Reference | -    | -     | -      |
| Yes and it was given                                       | 154 | 27 | 18%  | 0.81      | 0.51 | 1.28  | 0.37   |
| Yes and it was sometimes available, but less than required | 8   | 1  | 13%  | 0.58      | 0.09 | 3.73  | 0.56   |
| Yes, but it was not available *                            | 5   | 3  | 60%  | 2.78      | 1.28 | 6.06  | 0.01   |
| Time to first feed (days): ‡                               | 225 | -  | -    | 1.01      | 0.94 | 1.09  | 0.67   |
| Time to full feeds (days): ‡                               | 246 | -  | -    | 0.99      | 0.91 | 1.07  | 0.90   |
| Duration of hospital stay (days): **                       | 301 | -  | -    | 0.93      | 0.91 | 0.96  | <0.001 |
| Did the patient have a surgical site infection?            |     |    |      |           |      |       |        |
| No                                                         | 191 | 30 | 16%  | Reference | -    | -     | -      |
| Yes                                                        | 32  | 6  | 19%  | 1.19      | 0.53 | 2.64  | 0.66   |
| N/A: no surgical wound §                                   | 101 | 29 | 29%  | 1.82      | 1.16 | 2.86  | 0.009  |
| Did the patient have a full thickness wound dehiscence? †  |     |    |      |           |      |       |        |
| No                                                         | 214 | 32 | 15%  | Reference | -    | -     | -      |
| Yes                                                        | 11  | 4  | 36%  | 2.43      | 1.04 | 5.66  | 0.03   |
| N/A: no surgical wound                                     | 99  | 29 | 29%  | 1.95      | 1.25 | 3.05  | 0.003  |
| Did the patient require a further unplanned intervention?  |     |    |      |           |      |       |        |
| No                                                         | 243 | 33 | 14%  | Reference | -    | -     | -      |
| Yes - percutaneous or surgical intervention                | 31  | 11 | 35%  | 2.61      |      |       | 0.001  |
| N/A: no primary intervention undertaken §                  | 50  | 21 | 42%  | 3.09      |      |       | <0.001 |
| Country income status:                                     |     |    |      |           |      |       |        |
| HIC                                                        | 70  | 12 | 17%  | Reference | -    | -     | -      |
| MIC ***                                                    | 241 | 49 | 20%  | 1.18      | 0.66 | 2.10  | 0.30   |
| LIC ***                                                    | 14  | 4  | 29%  | 1.66      | 0.62 | 4.42  | <0.001 |
| <b>Condition specific variables</b>                        |     |    |      |           |      |       |        |
| Type of Exomphalos?                                        |     |    |      |           |      |       |        |
| Minor                                                      | 175 | 27 | 22%  | reference | -    | -     | -      |
| Major                                                      | 148 | 38 | 26%  | 1.66      | 1.07 | 2.59  | 0.02   |
| Hypoglycaemic on arrival?                                  |     |    |      |           |      |       |        |
| No                                                         | 242 | 38 | 16%  | reference | -    | -     | -      |
| Yes                                                        | 39  | 11 | 28%  | 1.80      | 1.01 | 3.21  | 0.05   |
| Blood glucose not measured                                 | 43  | 16 | 37%  | 2.37      | 1.46 | 3.85  | 0.001  |
| Did the patient have a ruptured sac?                       |     |    |      |           |      |       |        |
| No                                                         | 288 | 48 | 17%  | reference | -    | -     | -      |
| Yes                                                        | 34  | 17 | 50%  | 3.00      | 1.96 | 4.59  | <0.001 |
| Primary intervention:                                      |     |    |      |           |      |       |        |
| Primary operative closure                                  | 164 | 21 | 13%  | reference | -    | -     | -      |
| Staged closure                                             | 32  | 9  | 28%  | 2.20      | 1.11 | 4.35  | 0.024  |
| Conservative management                                    | 120 | 33 | 28%  | 2.15      | 1.31 | 3.52  | 0.002  |

\*Excluded from multivariable analysis due to low counts and inability to combine with another category. †Excluded from the multivariable analysis due to low or no counts and inability to collapse categories. ‡Excluded from multivariable analysis as this variable is a sub-group.§ N/A groups were not presented on the forest plots. \*\*Excluded from multivariable analysis due to missing data. \*\*\*Category collapsed for the multivariable analysis due to low counts. CI: Confidence interval. HIC: High-income countries. LIC: Low-income countries. MIC: Middle-income countries. N/A: Not applicable. RR: Risk Ratio.

**Supplementary Table 16: Univariable analysis of factors affecting mortality for patients with anorectal malformation**

| Generic variables                                                                      | N (total = 991) | Died, N | Died, % | RR        | 95% CI |       | P value |
|----------------------------------------------------------------------------------------|-----------------|---------|---------|-----------|--------|-------|---------|
| Sex:                                                                                   |                 |         |         |           |        |       |         |
| Male                                                                                   | 575             | 60      | 10%     | Reference | -      | -     | -       |
| Female                                                                                 | 398             | 33      | 8%      | 0.79      | 0.52   | 1.19  | 0.26    |
| Ambiguous                                                                              | 17              | 9       | 52%     | 5.07      | 3.05   | 8.43  | <0.001  |
| Gestational age at birth:                                                              | 977             | -       | -       | 0.84      | 0.80   | 0.88  | <0.001  |
| Age at presentation (in hours):                                                        | 989             | -       | -       | 0.99      | 0.99   | 0.99  | 0.002   |
| Weight at presentation (kg):                                                           | 988             | -       | -       | 0.43      | 0.34   | 0.56  | <0.001  |
| Does the patient have another anomaly or another study condition?                      |                 |         |         |           |        |       |         |
| No                                                                                     | 430             | 19      | 4%      | Reference | -      | -     | -       |
| Yes                                                                                    | 561             | 84      | 15%     | 3.38      | 2.09   | 5.48  | <0.001  |
| Antenatal diagnosis?                                                                   |                 |         |         |           |        |       |         |
| No: either no ultrasound or ultrasound with no problem identified                      | 828             | 74      | 9%      | Reference | -      | -     | -       |
| Yes: study condition diagnosed or problem identified                                   | 161             | 28      | 17%     | 1.94      | 1.30   | 2.90  | 0.001   |
| Distance from the patients home to the study centre (km):                              | 989             | -       | 0%      | 0.99      | 0.99   | 1.00  | 0.35    |
| Born at the study centre?                                                              |                 |         |         |           |        |       |         |
| No                                                                                     | 835             | 81      | 10%     | Reference | -      | -     | -       |
| Yes                                                                                    | 156             | 22      | 14%     | 1.45      | 0.93   | 2.25  | 0.09    |
| Type of delivery:                                                                      |                 |         |         |           |        |       |         |
| Vaginal (spontaneous)                                                                  | 520             | 49      | 9%      | Reference | -      | -     | -       |
| Vaginal (induced)                                                                      | 42              | 3       | 7%      | 0.75      | 0.24   | 2.33  | 0.62    |
| Caesarean section (elective)                                                           | 240             | 22      | 9%      | 0.97      | 0.60   | 1.57  | 0.91    |
| Caesarean section (urgent/non-elective)                                                | 177             | 29      | 16%     | 1.73      | 1.13   | 2.66  | 0.01    |
| Was the patient septic on arrival to your hospital?                                    |                 |         |         |           |        |       |         |
| No                                                                                     | 879             | 72      | 8%      | Reference | -      | -     | -       |
| Yes                                                                                    | 112             | 31      | 28%     | 3.37      | 2.32   | 4.90  | <0.001  |
| Was the patient hypothermic and/or hypovolaemic on arrival to your hospital?           |                 |         |         |           |        |       |         |
| No                                                                                     | 883             | 72      | 8%      | Reference | -      | -     | -       |
| Yes                                                                                    | 108             | 31      | 29%     | 3.52      | 2.42   | 5.10  | <0.001  |
| Did the patient receive an umbilical vein catheter?                                    |                 |         |         |           |        |       |         |
| No                                                                                     | 913             | 88      | 10%     | Reference | -      | -     | -       |
| Yes                                                                                    | 78              | 15      | 19%     | 1.99      | 1.21   | 3.27  | 0.006   |
| Did the patient receive a peripherally inserted central catheter (PICC)?               |                 |         |         |           |        |       |         |
| No                                                                                     | 818             | 88      | 11%     | Reference | -      | -     | -       |
| Yes                                                                                    | 173             | 15      | 9%      | 0.80      | 0.47   | 1.35  | 0.41    |
| Did the patient receive a percutaneously inserted direct central line?                 |                 |         |         |           |        |       |         |
| No                                                                                     | 941             | 97      | 10%     | Reference | -      | -     | -       |
| Yes                                                                                    | 50              | 6       | 12%     | 1.16      | 0.53   | 2.52  | 0.70    |
| Did the patient receive a surgically placed direct central line?                       |                 |         |         |           |        |       |         |
| No                                                                                     | 965             | 96      | 10%     | Reference | -      | -     | -       |
| Yes                                                                                    | 26              | 7       | 27%     | 2.70      | 1.39   | 5.24  | 0.003   |
| Time from arrival at study centre to primary intervention (hours) *                    | 900             | -       | -       | 0.99      | 0.99   | 1.00  | 0.16    |
| American Society of Anesthesiologists (ASA) Score at the time of primary intervention: |                 |         |         |           |        |       |         |
| 1 or 2                                                                                 | 633             | 31      | 5%      | Reference | -      | -     | -       |
| 3                                                                                      | 172             | 25      | 15%     | 2.96      | 1.80   | 4.89  | <0.001  |
| 4 or 5                                                                                 | 90              | 25      | 28%     | 5.67      | 3.51   | 9.15  | <0.001  |
| N/A: no intervention †                                                                 | 93              | 21      | 23%     | 4.61      | 2.76   | 7.67  | <0.001  |
| What type of anaesthesia was used for the primary intervention?                        |                 |         |         |           |        |       |         |
| General anaesthesia with endotracheal tube or laryngeal airway                         | 841             | 69      | 8%      | Reference | -      | -     | -       |
| No general anaesthesia                                                                 | 63              | 9       | 14%     | 1.74      | 0.91   | 3.32  | 0.092   |
| N/A: no surgery or primary intervention undertaken †                                   | 86              | 24      | 28%     | 3.40      | 2.26   | 5.11  | <0.001  |
| Who undertook the anaesthetic for the primary intervention?                            |                 |         |         |           |        |       |         |
| Anaesthetic doctor                                                                     | 847             | 68      | 8%      | Reference | -      | -     | -       |
| Non-doctor anaesthetist                                                                | 28              | 9       | 32%     | 4.00      | 2.23   | 7.18  | <0.001  |
| No anaesthetic undertaken †                                                            | 114             | 24      | 21%     | 2.62      | 1.71   | 4.00  | <0.001  |
| Who undertook the primary intervention?                                                |                 |         |         |           |        |       |         |
| Paediatric surgeon (or junior with paediatric surgeon assisting/ in the room)          | 877             | 75      | 9%      | Reference | -      | -     | -       |
| Non-paediatric surgeon                                                                 | 32              | 3       | 9%      | 1.09      | 0.36   | 3.29  | 0.87    |
| N/A: no surgery or primary intervention undertaken †                                   | 80              | 24      | 30%     | 3.50      | 2.35   | 5.22  | <0.001  |
| Was a Surgical Safety Checklist used at the time of primary intervention?              |                 |         |         |           |        |       |         |
| Yes                                                                                    | 702             | 48      | 7%      | Reference | -      | -     | -       |
| No                                                                                     | 174             | 28      | 16%     | 2.35      | 1.52   | 3.63  | <0.001  |
| N/A: a conservative primary intervention or no surgery undertaken †                    | 114             | 26      | 23%     | 3.33      | 2.16   | 5.15  | <0.001  |
| Total duration of antibiotics following primary intervention (days): *                 | 982             | -       | -       | 0.98      | 0.94   | 1.02  | 0.43    |
| Did the patient receive a blood transfusion?                                           |                 |         |         |           |        |       |         |
| No: not required                                                                       | 783             | 48      | 6%      | Reference | -      | -     | -       |
| Yes: cross-matched OR not cross-matched                                                | 194             | 52      | 27%     | 4.37      | 3.05   | 6.26  | <0.001  |
| No: it was required but not available                                                  | 12              | 3       | 25%     | 4.07      | 1.47   | 11.28 | 0.007   |
| Did the patient require ventilation?                                                   |                 |         |         |           |        |       |         |
| No                                                                                     | 657             | 24      | 4%      | Reference | -      | -     | -       |

|                                                               |     |    |     |           |       |       |        |
|---------------------------------------------------------------|-----|----|-----|-----------|-------|-------|--------|
| Yes and it was given                                          | 321 | 68 | 21% | 5.79      | 3.71  | 9.05  | <0.001 |
| Yes, but it was not available                                 | 12  | 11 | 92% | 25.09     | 16.35 | 38.51 | <0.001 |
| Did the patient require parenteral nutrition?                 |     |    |     |           |       |       |        |
| No                                                            | 605 | 53 | 9%  | Reference | -     | -     | -      |
| Yes and it was given                                          | 358 | 37 | 10% | 1.17      | 0.79  | 1.75  | 0.41   |
| Yes and it was sometimes available, but less than required    | 12  | 4  | 33% | 3.80      | 1.64  | 8.82  | 0.002  |
| Yes, but it was not available                                 | 14  | 8  | 57% | 6.52      | 3.87  | 10.99 | <0.001 |
| Time to first feed (days): *                                  | 833 | -  | -   | 1.07      | 1.01  | 1.13  | 0.01   |
| Time to full feeds (days): *                                  | 876 | -  | -   | 1.01      | 0.95  | 1.07  | 0.63   |
| Duration of hospital stay (days): ‡                           | 960 | -  | -   | 0.95      | 0.91  | 0.99  | 0.02   |
| Did the patient have a surgical site infection?               |     |    |     |           |       |       |        |
| No                                                            | 775 | 66 | 9%  | Reference | -     | -     | -      |
| Yes                                                           | 86  | 12 | 14% | 1.63      | 0.92  | 2.90  | 0.09   |
| N/A: no surgical wound †                                      | 128 | 24 | 19% | 2.20      | 1.43  | 3.37  | <0.001 |
| Did the patient have a full thickness wound dehiscence?       |     |    |     |           |       |       |        |
| No                                                            | 829 | 72 | 9%  | Reference | -     | -     | -      |
| Yes                                                           | 38  | 4  | 11% | 1.21      | 0.46  | 3.14  | 0.69   |
| N/A: no surgical wound †                                      | 122 | 26 | 21% | 2.45      | 1.63  | 3.68  | <0.001 |
| Did the patient require a further unplanned intervention?     |     |    |     |           |       |       |        |
| No                                                            | 805 | 60 | 7%  | Reference | -     | -     | -      |
| Yes - percutaneous or surgical intervention                   | 100 | 20 | 20% | 2.68      | 1.69  | 4.25  | <0.001 |
| N/A: no primary intervention undertaken †                     | 83  | 22 | 27% | 3.55      | 2.30  | 5.48  | <0.001 |
| Country income status:                                        |     |    |     |           |       |       |        |
| HIC                                                           | 178 | 3  | 2%  | Reference | -     | -     | -      |
| MIC §                                                         | 788 | 95 | 12% | 7.15      | 2.29  | 22.32 |        |
| LIC §                                                         | 25  | 5  | 20% | 11.86     | 3.01  | 46.67 |        |
| <b>Condition specific variables</b>                           |     |    |     |           |       |       |        |
| Type of anorectal malformation (Krackenbeck classification)   |     |    |     |           |       |       |        |
| Low                                                           | 327 | 16 | 5%  | reference | -     | -     | -      |
| High                                                          | 592 | 73 | 12% | 2.52      | 1.49  | 4.26  | 0.001  |
| Rare variant or other                                         | 71  | 13 | 18% | 3.74      | 1.88  | 7.43  | <0.001 |
| Did the neonate have pre-operative bowel perforation?         |     |    |     |           |       |       |        |
| No                                                            | 951 | 89 | 9%  | reference | -     | -     | -      |
| Yes                                                           | 37  | 12 | 32% | 3.47      | 2.09  | 5.75  | <0.001 |
| Primary intervention:                                         |     |    |     |           |       |       |        |
| Fistula dilation and/or washout via fistula, no surgery (yes) | 94  | 5  | 5%  | 0.49      | 0.20  | 1.17  | 0.11   |
| Divided sigmoid colostomy (yes)                               | 306 | 27 | 9%  | 0.80      | 0.52  | 1.21  | 0.28   |
| Other colostomy or stoma (yes)                                | 261 | 40 | 15% | 1.78      | 1.23  | 2.57  | 0.002  |
| Anoplasty/anorectoplasty (yes)                                | 223 | 6  | 3%  | 0.21      | 0.09  | 0.48  | <0.001 |
| Anorectal pull-through (yes)                                  | 94  | 1  | 1%  | 0.09      | 0.01  | 0.66  | 0.018  |
| Palliative care/no intervention (yes) †                       | 46  | 23 | 50% | 5.91      | 4.13  | 8.44  | <0.001 |
| Electrolyte disturbance                                       |     |    |     |           |       |       |        |
| No                                                            | 751 | 41 | 6%  | reference | -     | -     | -      |
| Yes                                                           | 84  | 30 | 36% | 6.54      | 4.33  | 9.89  | <0.001 |
| Not applicable †                                              | 156 | 32 | 21% | 5.76      | 2.45  | 5.77  | <0.001 |

\*Excluded from multivariable analysis as this variable is a sub-group. †N/A groups were not presented on the forest plots. ‡Excluded from multivariable analysis due to missing data. §Category collapsed for the multivariable analysis due to low counts. CI: Confidence interval. HIC: High-income countries. LIC: Low-income countries. MIC: Middle-income countries. N/A: Not applicable. RR: Risk Ratio.

**Supplementary Table 17: Univariable analysis of factors affecting mortality for patients with Hirschsprung's disease**

| Generic variables                                                                      | N (total = 517) | Died, N | Died, % | RR        | 95% CI       | P value |
|----------------------------------------------------------------------------------------|-----------------|---------|---------|-----------|--------------|---------|
| Sex:                                                                                   |                 |         |         | Reference | -            | -       |
| Male                                                                                   | 399             | 23      | 6%      |           |              |         |
| Female                                                                                 | 118             | 7       | 6%      | 1.02      | 0.45 - 2.34  | 0.94    |
| Gestational age at birth:                                                              | 505             | -       | -       | 0.91      | 0.76 - 1.09  | 0.34    |
| Age at presentation (in hours):                                                        | 512             | -       | -       | 0.99      | 0.99 - 1.00  | 0.25    |
| Weight at presentation (kg):                                                           | 516             | -       | -       | 0.84      | 0.65 - 1.08  | 0.17    |
| Does the patient have another anomaly or another study condition?                      |                 |         |         | Reference | -            | -       |
| No                                                                                     | 406             | 21      | 5%      |           |              |         |
| Yes                                                                                    | 111             | 9       | 8%      | 1.56      | 0.73 - 3.32  | 0.24    |
| Antenatal diagnosis? *                                                                 |                 |         |         | Reference | -            | -       |
| No: either no ultrasound or ultrasound with no problem identified                      | 478             | 27      | 6%      |           |              |         |
| Yes: study condition diagnosed or problem identified                                   | 38              | 3       | 8%      | 1.39      | 0.44 - 4.40  | 0.56    |
| Distance from the patients home to the study centre (km): †                            | 514             | -       | -       | 0.99      | 0.99 - 1.00  | 0.49    |
| Born at the study centre?                                                              |                 |         |         | Reference | -            | -       |
| No                                                                                     | 482             | 26      | 5%      |           |              |         |
| Yes                                                                                    | 34              | 4       | 12%     | 2.18      | 0.80 - 5.89  | 0.12    |
| Type of delivery: *                                                                    |                 |         |         | Reference | -            | -       |
| Vaginal (spontaneous)                                                                  | 267             | 23      | 9%      |           |              |         |
| Vaginal (induced)                                                                      | 35              | 0       | 0%      | -         | -            | -       |
| Caesarean section (elective)                                                           | 146             | 5       | 3%      | 0.39      | 0.15 - 1.02  | 0.06    |
| Caesarean section (urgent/non-elective)                                                | 57              | 2       | 4%      | 0.40      | 0.09 - 1.68  | 0.21    |
| Was the patient septic on arrival to your hospital? ‡                                  |                 |         |         | Reference | -            | -       |
| No                                                                                     | 385             | 12      | 3%      |           |              |         |
| Yes                                                                                    | 132             | 18      | 14%     | 4.37      | 2.16 - 8.84  | <0.001  |
| Was the patient hypothermic and/or hypovolaemic on arrival to your hospital?           |                 |         |         | Reference | -            | -       |
| No                                                                                     | 414             | 16      | 4%      |           |              |         |
| Yes                                                                                    | 103             | 14      | 14%     | 3.51      | 1.77 - 6.97  | <0.001  |
| Did the patient receive an umbilical vein catheter? *                                  |                 |         |         | Reference | -            | -       |
| No                                                                                     | 500             | 26      | 5%      |           |              |         |
| Yes                                                                                    | 17              | 4       | 24%     | 4.52      | 1.77 - 11.53 | 0.002   |
| Did the patient receive a peripherally inserted central catheter (PICC)?               |                 |         |         | Reference | -            | -       |
| No                                                                                     | 436             | 28      | 6%      |           |              |         |
| Yes                                                                                    | 81              | 2       | 2%      | 0.38      | 0.09 - 1.58  | 0.18    |
| Did the patient receive a percutaneously inserted direct central line? *               |                 |         |         | Reference | -            | -       |
| No                                                                                     | 489             | 27      | 5%      |           |              |         |
| Yes                                                                                    | 28              | 3       | 11%     | 1.94      | 0.62 - 6.01  | 0.25    |
| Did the patient receive a surgically placed direct central line? *                     |                 |         |         | Reference | -            | -       |
| No                                                                                     | 505             | 29      | 6%      |           |              |         |
| Yes                                                                                    | 12              | 1       | 8%      | 1.45      | 0.21 - 9.81  | 0.70    |
| Time from arrival at study centre to primary intervention (hours) §                    | 454             | -       | -       | 0.99      | 0.99 - 1.00  | 0.07    |
| American Society of Anesthesiologists (ASA) Score at the time of primary intervention: |                 |         |         | Reference | -            | -       |
| 1 or 2                                                                                 | 267             | 9       | 3%      |           |              |         |
| 3 **                                                                                   | 122             | 8       | 7%      | 1.94      | 0.76 - 4.92  | 0.16    |
| 4 or 5 **                                                                              | 30              | 10      | 33%     | 9.88      | 4.36 - 22.41 | <0.001  |
| N/A: no intervention ***                                                               | 98              | 3       | 3%      | 0.90      | 0.25 - 3.29  | 0.88    |
| What type of anaesthesia was used for the primary intervention? *                      |                 |         |         | Reference | -            | -       |
| General anaesthesia with endotracheal tube or laryngeal airway                         | 331             | 24      | 7%      |           |              |         |
| No general anaesthesia                                                                 | 100             | 1       | 1%      | 0.13      | 0.01 - 1.00  | 0.05    |
| N/A: no surgery or primary intervention undertaken.                                    | 86              | 5       | 6%      | 0.80      | 0.31 - 2.04  | 0.64    |
| Who undertook the anaesthetic for the primary intervention? *                          |                 |         |         | Reference | -            | -       |
| Anaesthetic doctor                                                                     | 330             | 23      | 7%      |           |              |         |
| Non-doctor anaesthetist                                                                | 8               | 1       | 13%     | 1.79      | 0.27 - 11.71 | 0.54    |
| No anaesthetic undertaken                                                              | 179             | 6       | 3%      | 0.48      | 0.19 - 1.16  | 0.10    |
| Who undertook the primary intervention? *                                              |                 |         |         | Reference | -            | -       |
| Paediatric surgeon (or junior with paediatric surgeon assisting/ in the room)          | 394             | 22      | 6%      |           |              |         |
| Non-paediatric surgeon                                                                 | 53              | 3       | 6%      | 1.01      | 0.31 - 3.27  | 0.98    |
| N/A: no surgery or primary intervention undertaken                                     | 70              | 5       | 7%      | 1.27      | 0.50 - 3.26  | 0.60    |
| Was a Surgical Safety Checklist used at the time of primary intervention?              |                 |         |         | Reference | -            | -       |
| Yes                                                                                    | 239             | 14      | 6%      |           |              |         |
| No                                                                                     | 107             | 11      | 10%     | 1.75      | 0.82 - 3.74  | 0.14    |
| N/A: a conservative primary intervention or no surgery undertaken ***                  | 171             | 5       | 3%      | 0.49      | 0.18 - 1.36  | 0.17    |
| Total duration of antibiotics following primary intervention (days): §                 | 454             | -       | -       | 0.94      | 0.87 - 1.01  | 0.13    |
| Did the patient receive a blood transfusion?                                           |                 |         |         | Reference | -            | -       |
| No: not required                                                                       | 366             | 9       | 3%      |           |              |         |
| Yes: cross-matched OR not cross-matched                                                | 147             | 20      | 14%     | 5.53      | 2.57 - 11.87 | <0.001  |
| No: it was required but not available ****                                             | 3               | 1       | 33%     | 13.55     | 2.41 - 76.24 | 0.003   |
| Did the patient require ventilation?                                                   |                 |         |         | Reference | -            | -       |
| No                                                                                     | 433             | 18      | 4%      |           |              |         |
| Yes and it was given                                                                   | 82              | 11      | 13%     | 3.22      | 1.58 - 6.58  | 0.001   |
| Yes, but it was not available ****                                                     | 2               | 1       | 50%     | 12.02     | 2.79 - 51.75 | 0.001   |

|                                                                                                   |     |    |     |           |      |       |        |   |
|---------------------------------------------------------------------------------------------------|-----|----|-----|-----------|------|-------|--------|---|
| Did the patient require parenteral nutrition?                                                     |     |    |     |           |      |       |        |   |
| No                                                                                                | 303 | 16 | 5%  | Reference | -    | -     | -      | - |
| Yes and it was given                                                                              | 167 | 7  | 4%  | 0.79      | 0.33 | 1.89  | 0.60   |   |
| Yes and it was sometimes available, but less than required **                                     | 38  | 2  | 5%  | 0.99      | 0.23 | 4.17  | 0.99   |   |
| Yes, but it was not available **                                                                  | 8   | 5  | 63% | 11.83     | 5.76 | 24.28 | <0.001 |   |
| Time to first feed (days): §                                                                      | 394 | -  | -   | 0.96      | 0.78 | 1.19  | 0.75   |   |
| Time to full feeds (days): §                                                                      | 457 | -  | -   | 1.00      | 0.91 | 1.10  | 0.92   |   |
| Duration of hospital stay (days): †                                                               | 492 | -  | -   | 0.91      | 0.84 | 0.99  | 0.04   |   |
| Did the patient have a surgical site infection? *                                                 |     |    |     |           |      |       |        |   |
| No                                                                                                | 324 | 19 | 6%  | Reference | -    | -     | -      | - |
| Yes                                                                                               | 29  | 6  | 21% | 3.52      | 1.52 | 8.14  | 0.003  |   |
| N/A: no surgical wound                                                                            | 164 | 5  | 3%  | 0.51      | 0.19 | 1.36  | 0.18   |   |
| Did the patient have a full thickness wound dehiscence? *                                         |     |    |     |           |      |       |        |   |
| No                                                                                                | 343 | 22 | 6%  | Reference | -    | -     | -      | - |
| Yes                                                                                               | 12  | 3  | 25% | 3.89      | 1.34 | 11.26 | 0.01   |   |
| N/A: no surgical wound                                                                            | 162 | 5  | 3%  | 0.48      | 0.18 | 1.24  | 0.13   |   |
| Did the patient require a further unplanned intervention? *                                       |     |    |     |           |      |       |        |   |
| No                                                                                                | 387 | 22 | 6%  | Reference | -    | -     | -      | - |
| Yes - percutaneous or surgical intervention                                                       | 69  | 5  | 7%  | 1.27      | 0.49 | 3.25  | 0.61   |   |
| N/A: no primary intervention undertaken                                                           | 61  | 3  | 5%  | 0.86      | 0.26 | 2.80  | 0.80   |   |
| Country income status:                                                                            |     |    |     |           |      |       |        |   |
| HIC                                                                                               | 107 | 2  | 2%  | Reference | -    | -     | -      | - |
| MIC **                                                                                            | 393 | 26 | 7%  | 3.53      | 0.85 | 14.69 | 0.08   |   |
| LIC **                                                                                            | 17  | 2  | 12% | 6.29      | 0.94 | 41.82 | 0.05   |   |
| <b>Condition specific variables</b>                                                               |     |    |     |           |      |       |        |   |
| Time to first passage of meconium after birth: *                                                  |     |    |     |           |      |       |        |   |
| Less than 24 hours                                                                                | 80  | 2  | 3%  | reference | -    | -     | -      | - |
| 24-48 hours                                                                                       | 148 | 6  | 4%  | 1.62      | 0.33 | 7.86  | 0.55   |   |
| Over 48 hours                                                                                     | 187 | 19 | 10% | 4.06      | 0.97 | 17.06 | 0.06   |   |
| Unknown or missing                                                                                | 102 | 3  | 3%  | 1.18      | 0.20 | 6.88  | 0.86   |   |
| Features at presentation:                                                                         |     |    |     |           |      |       |        |   |
| Abdominal distension (yes)                                                                        | 460 | 24 | 5%  | 0.50      | 0.21 | 1.16  | 0.11   |   |
| Bilious vomiting (yes)                                                                            | 190 | 11 | 5%  | 1.00      | 0.48 | 2.05  | 0.99   |   |
| Poor feeding (yes)                                                                                | 189 | 12 | 6%  | 1.16      | 0.57 | 2.35  | 0.69   |   |
| Non-bilious vomiting (yes)                                                                        | 103 | 7  | 7%  | 1.22      | 0.54 | 2.77  | 0.63   |   |
| Suspected enterocolitis (yes)                                                                     | 96  | 7  | 7%  | 1.33      | 0.59 | 3.02  | 0.49   |   |
| Perforation (yes) ‡                                                                               | 20  | 8  | 40% | 9.04      | 4.60 | 17.75 | <0.001 |   |
| Length of aganglionosis?                                                                          |     |    |     |           |      |       |        |   |
| Rectal **                                                                                         | 117 | 4  | 3%  | reference | -    | -     | -      | - |
| Sigmoid **                                                                                        | 179 | 5  | 3%  | 0.82      | 0.22 | 2.98  | 0.76   |   |
| Descending/transverse/ascending colon or small bowel **                                           | 86  | 9  | 11% | 3.06      | 0.97 | 9.62  | 0.06   |   |
| Unknown **                                                                                        | 135 | 12 | 9%  | 2.60      | 0.86 | 7.85  | 0.09   |   |
| Primary intervention: *                                                                           |     |    |     |           |      |       |        |   |
| Conservative                                                                                      | 187 | 5  | 3%  | reference | -    | -     | -      | - |
| Stoma                                                                                             | 196 | 20 | 10% | 3.82      | 1.46 | 9.97  | 0.01   |   |
| Pull-through                                                                                      | 109 | 0  | 0%  | -         | -    | -     | -      | - |
| Other (transanal posterior anorectal myectomy, palliative care or other)                          | 25  | 5  | 20% | 7.48      | 2.33 | 24.06 | 0.001  |   |
| Did the patient have any condition specific complications within 30-days of primary intervention: |     |    |     |           |      |       |        |   |
| Hirschsprung's associated enterocolitis (yes)                                                     | 69  | 11 | 16% | 3.76      | 1.87 | 7.56  | <0.001 |   |
| Electrolyte disturbance (yes)                                                                     | 47  | 13 | 28% | 7.65      | 3.96 | 14.76 | <0.001 |   |
| Other (yes) ***                                                                                   | 170 | 13 | 8%  | 1.56      | 0.78 | 3.14  | 0.21   |   |

\*Excluded from the multivariable analysis due to low or no counts and inability to collapse categories. †Excluded from multivariable analysis due to missing data. ‡Excluded due to collinearity. §Excluded from multivariable analysis as this variable is a sub-group. \*\*Category collapsed for the multivariable analysis due to low counts. \*\*\*N/A or 'other' groups were not presented on the forest plots. \*\*\*\*Excluded from multivariable analysis due to low counts and inability to combine with another category. CI: Confidence interval. HIC: High-income countries. LIC: Low-income countries. MIC: Middle-income countries. N/A: Not applicable. RR: Risk Ratio.

### Supplementary Figure 1: Multivariable analysis of factors affecting mortality in low- and middle-income countries

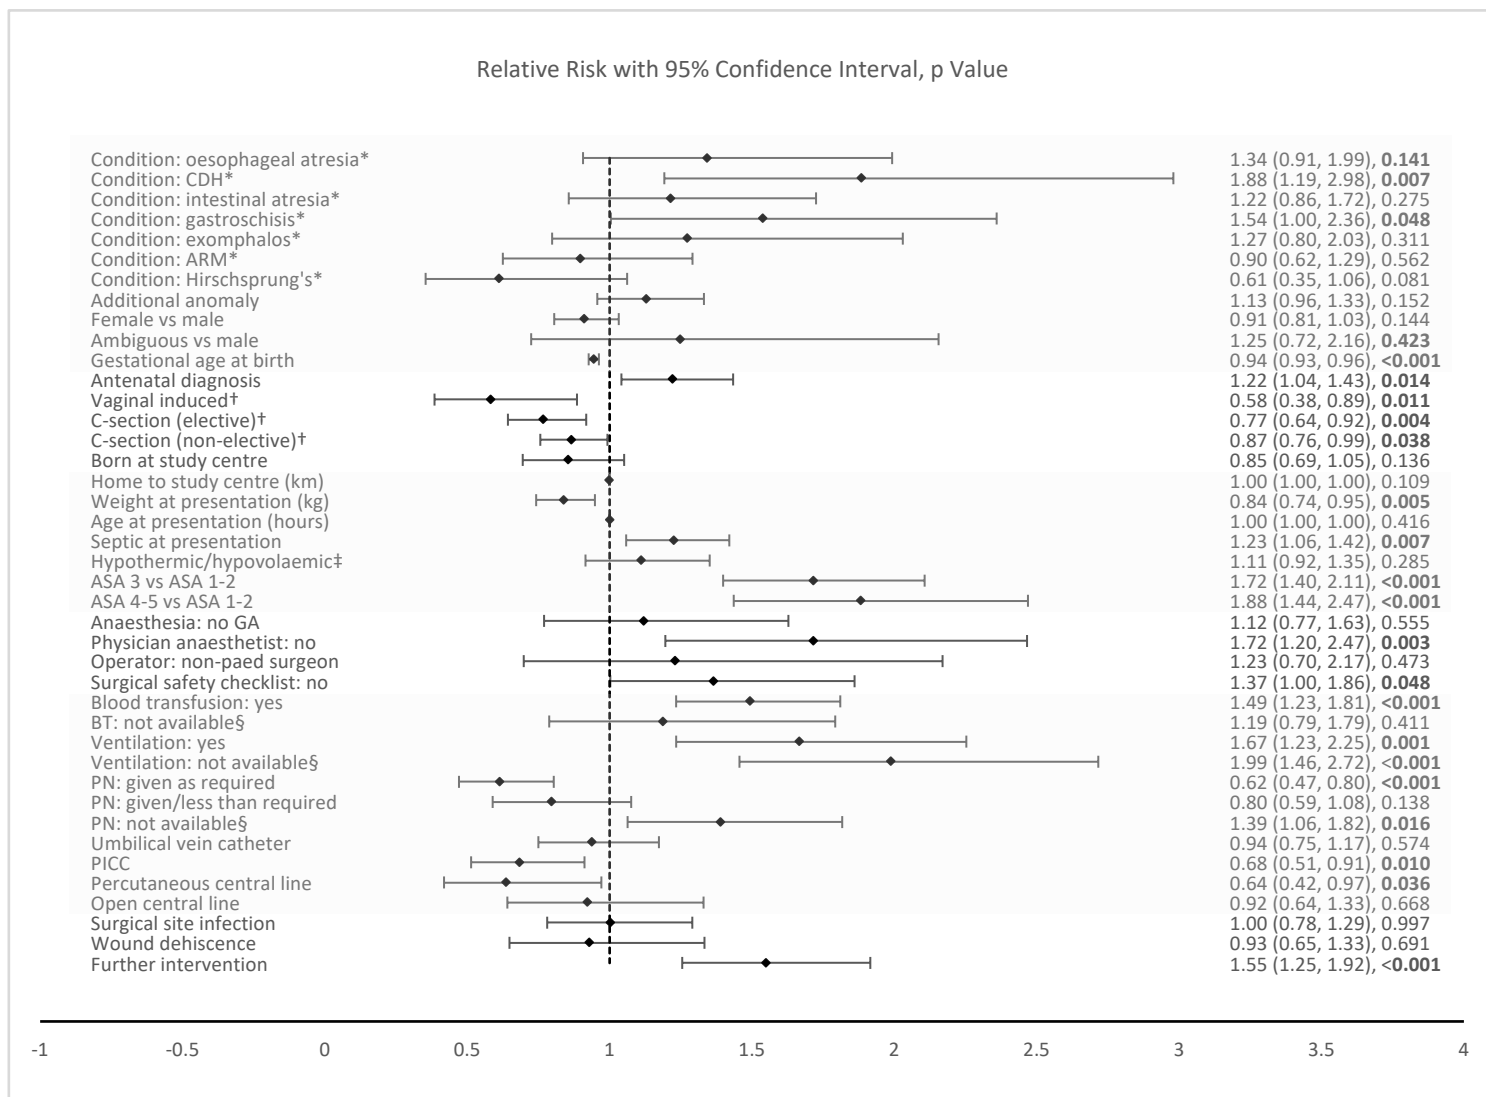

\*Vs non-condition (i.e. study patients with oesophageal atresia vs study patients without oesophageal atresia). †Vs spontaneous vaginal delivery. ‡At presentation. §When required. ARM: Anorectal malformation. ASA: American Society of Anesthesiologists score at primary intervention. BT: Blood transfusion. CDH: Congenital diaphragmatic hernia. C-section: Caesarean section. GA: General anaesthetic. PICC: Peripherally inserted central catheter. PN: Parenteral nutrition. Non-paed surgeon: Non-paediatric surgeon. Further intervention: Need for unplanned re-intervention within 30 days of surgery. Additional anomaly includes additional study condition(s) if present. Figure shading demarcates the variables into the following groups, respectively: demographics, antenatal care and birth, distance from home to study hospital and clinical condition at presentation, intra-operative factors, perioperative factors, and secondary outcomes. Of the 2953 study patients from low- and middle-income countries, 2868 were included within this multivariable model (n=85 excluded due to missing data).



**Supplementary Figure 2: Multivariable analysis of factors affecting mortality in high-income countries**

Relative Risk with 95% Confidence Interval, p Value

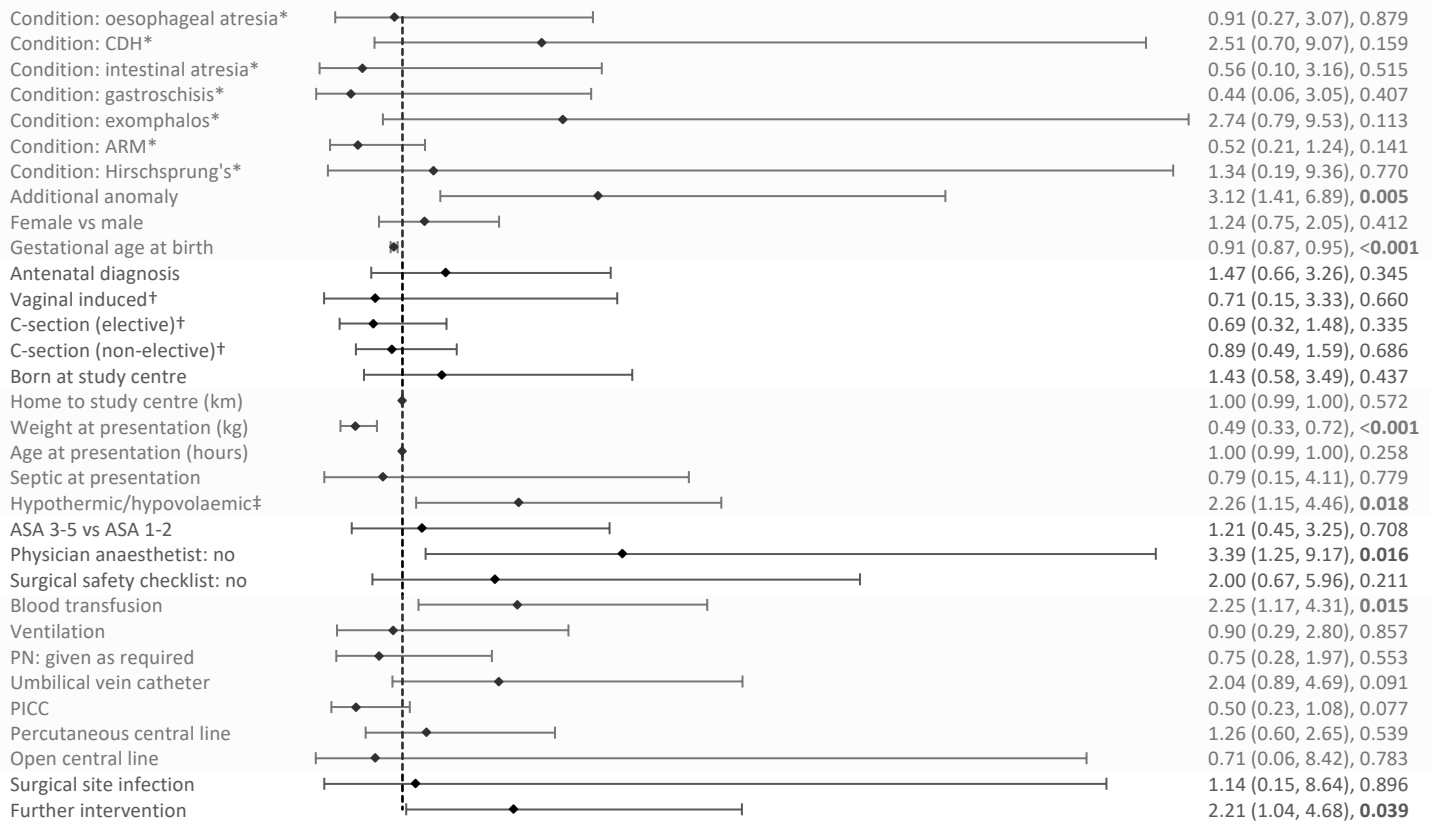

\* Vs non-condition (i.e. study patients with oesophageal atresia vs study patients without oesophageal atresia). †Vs spontaneous vaginal delivery. ‡At presentation. ARM: Anorectal malformation. ASA: American Society of Anesthesiologists score at primary intervention. CDH: Congenital diaphragmatic hernia. C-section: Caesarean section. GA: General anaesthetic. PICC: Peripherally inserted central catheter. PN: Parenteral nutrition. Further intervention: Need for unplanned re-intervention within 30 days of surgery. Additional anomaly includes additional study condition(s) if present. Figure shading demarcates the variables into the following groups, respectively: demographics, antenatal care and birth, distance from home to study hospital and clinical condition at presentation, intra-operative factors, perioperative factors, and secondary outcomes. Of the 896 study patients from high-income countries, 857 were included within this multivariable model (n=39 excluded due to missing data).

**Supplementary Figure 3: Multivariable analyses of factors affecting mortality for patients with oesophageal atresia**

Relative Risk with 95% Confidence Interval, p Value

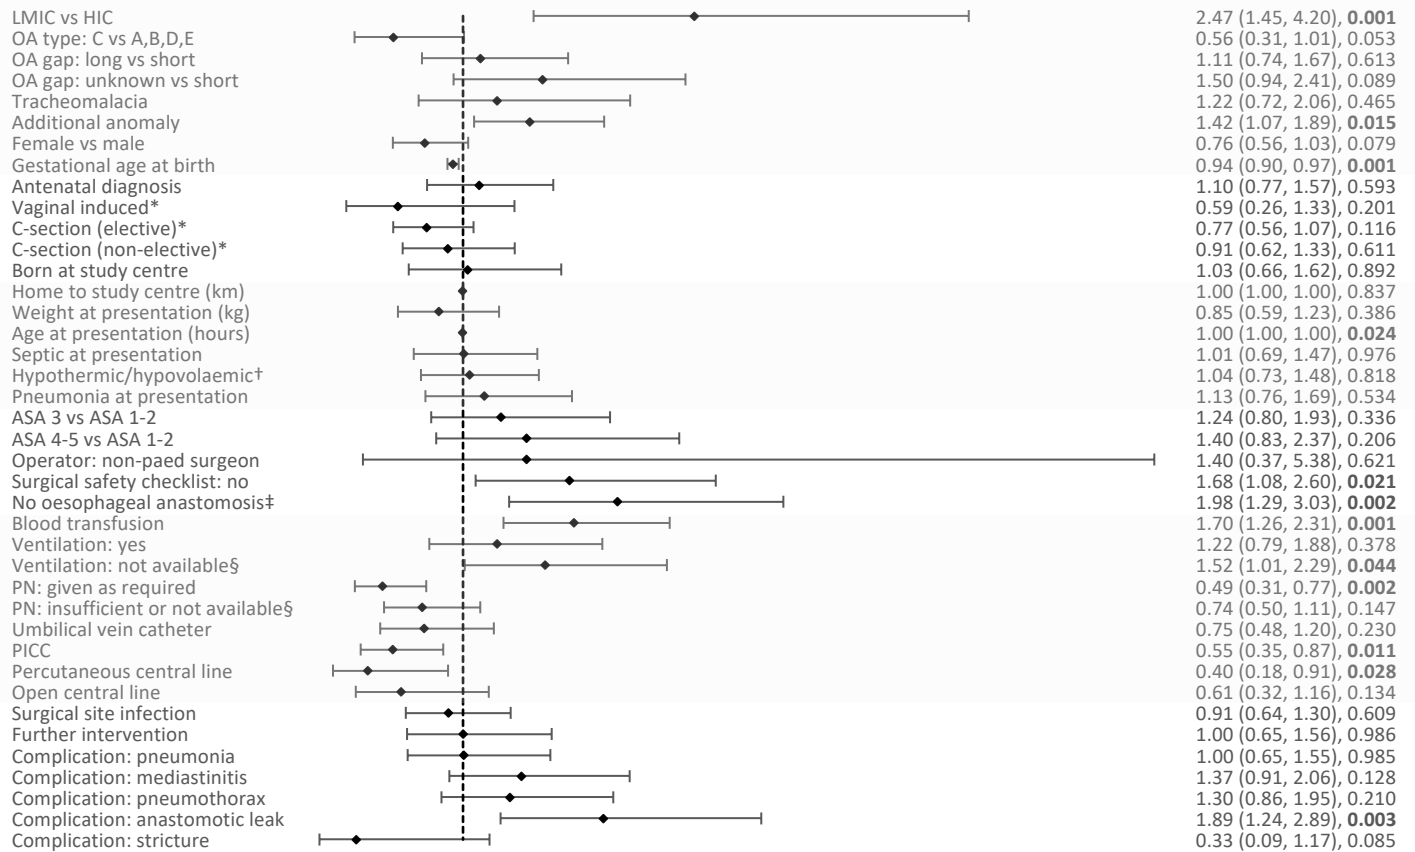

\*Vs spontaneous vaginal delivery. †At presentation. ‡Vs primary oesophageal anastomosis. §When required. ASA: American Society of Anesthesiologists score at primary surgical intervention. C-section: Caesarean section. HIC: High-income country. LMIC: Low- or middle-income country. OA: Oesophageal atresia. PICC: Peripherally inserted central catheter. PN: Parenteral nutrition. Further intervention: Need for unplanned re-intervention within 30 days of surgery. Additional anomaly includes additional study condition(s) if present. Figure shading demarcates the variables into the following groups, respectively: demographics, antenatal care and birth, distance from home to study hospital and clinical condition at presentation, intra-operative factors, perioperative factors, and secondary outcomes and condition-specific complications. Of the 560 study patients with oesophageal atresia, 538 were included within this multivariable model (n=22 excluded due to missing data).

**Supplementary Figure 4: Multivariable analyses of factors affecting mortality for patients with congenital diaphragmatic hernia**

Relative Risk with 95% Confidence Interval, p Value

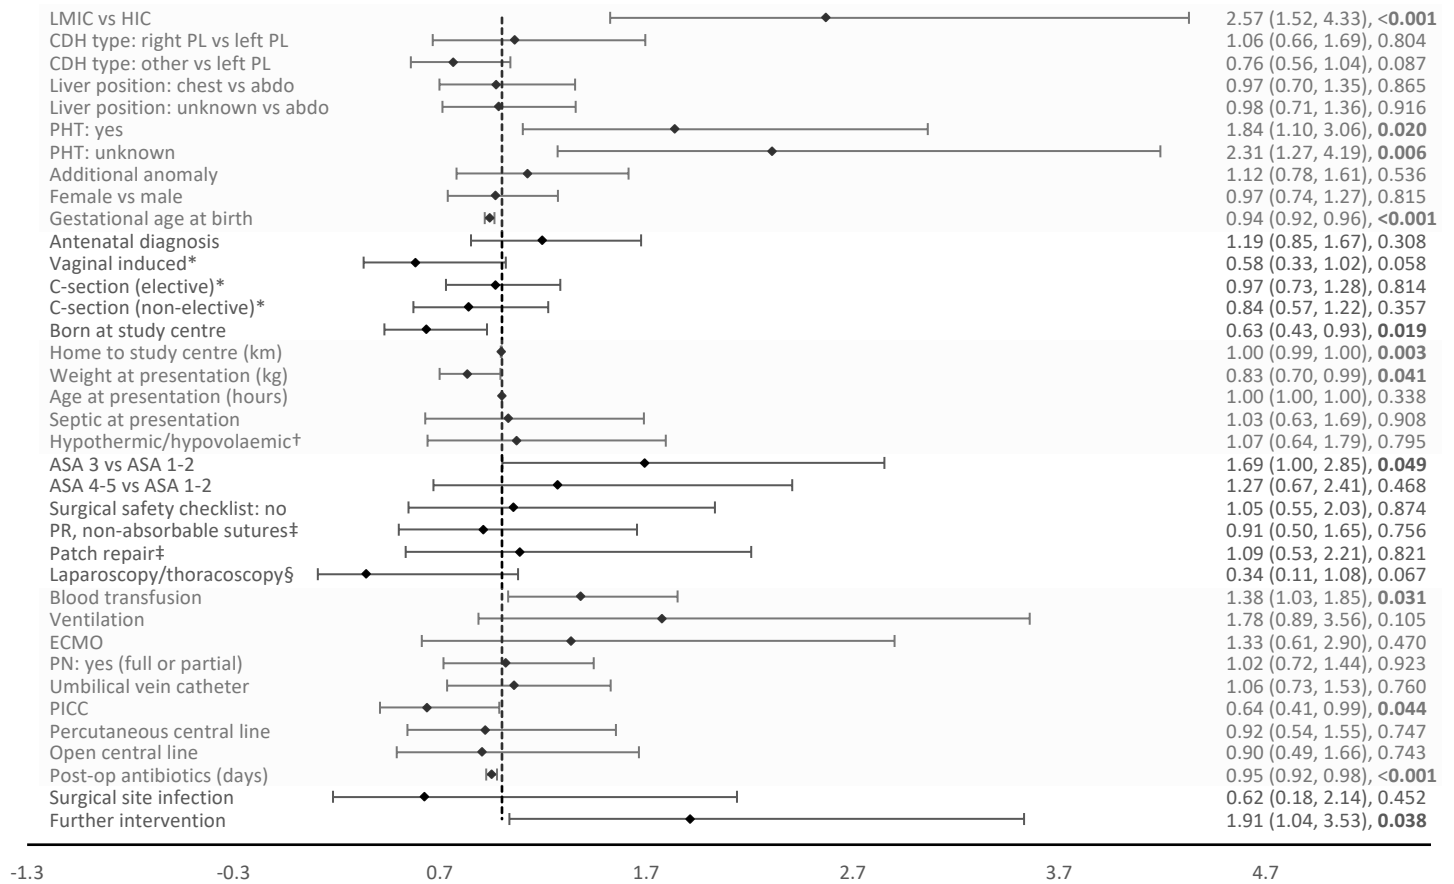

\*Vs spontaneous vaginal delivery. †At presentation. ‡Vs primary repair with absorbable sutures. §Vs laparotomy/thoracotomy. ASA: American Society of Anesthesiologists score at primary surgical intervention. CDH: Congenital diaphragmatic hernia. C-section: Caesarean section. ECMO: Extracorporeal membrane oxygenation. HIC: High-income country. LMIC: Low- or middle-income country. PL: Posteriolateral (Bochdalek). PHT: Pulmonary hypertension. PICC: Peripherally inserted central catheter. PN: Parenteral nutrition. PR: Primary repair. Further intervention: Need for unplanned re-intervention within 30 days of surgery. Additional anomaly includes additional study condition(s) if present. Three patients who required ventilation, but it was unavailable all died (not included in multivariable model). Figure shading demarcates the variables into the following groups, respectively: demographics, antenatal care and birth, distance from home to study hospital and clinical condition at presentation, intra-operative factors, perioperative factors, and secondary outcomes. Of the 448 study patients with CDH, 403 were included within this multivariable model (n=45 excluded due to missing data).

**Supplementary Figure 5: Multivariable analyses of factors affecting mortality for patients with intestinal atresia**

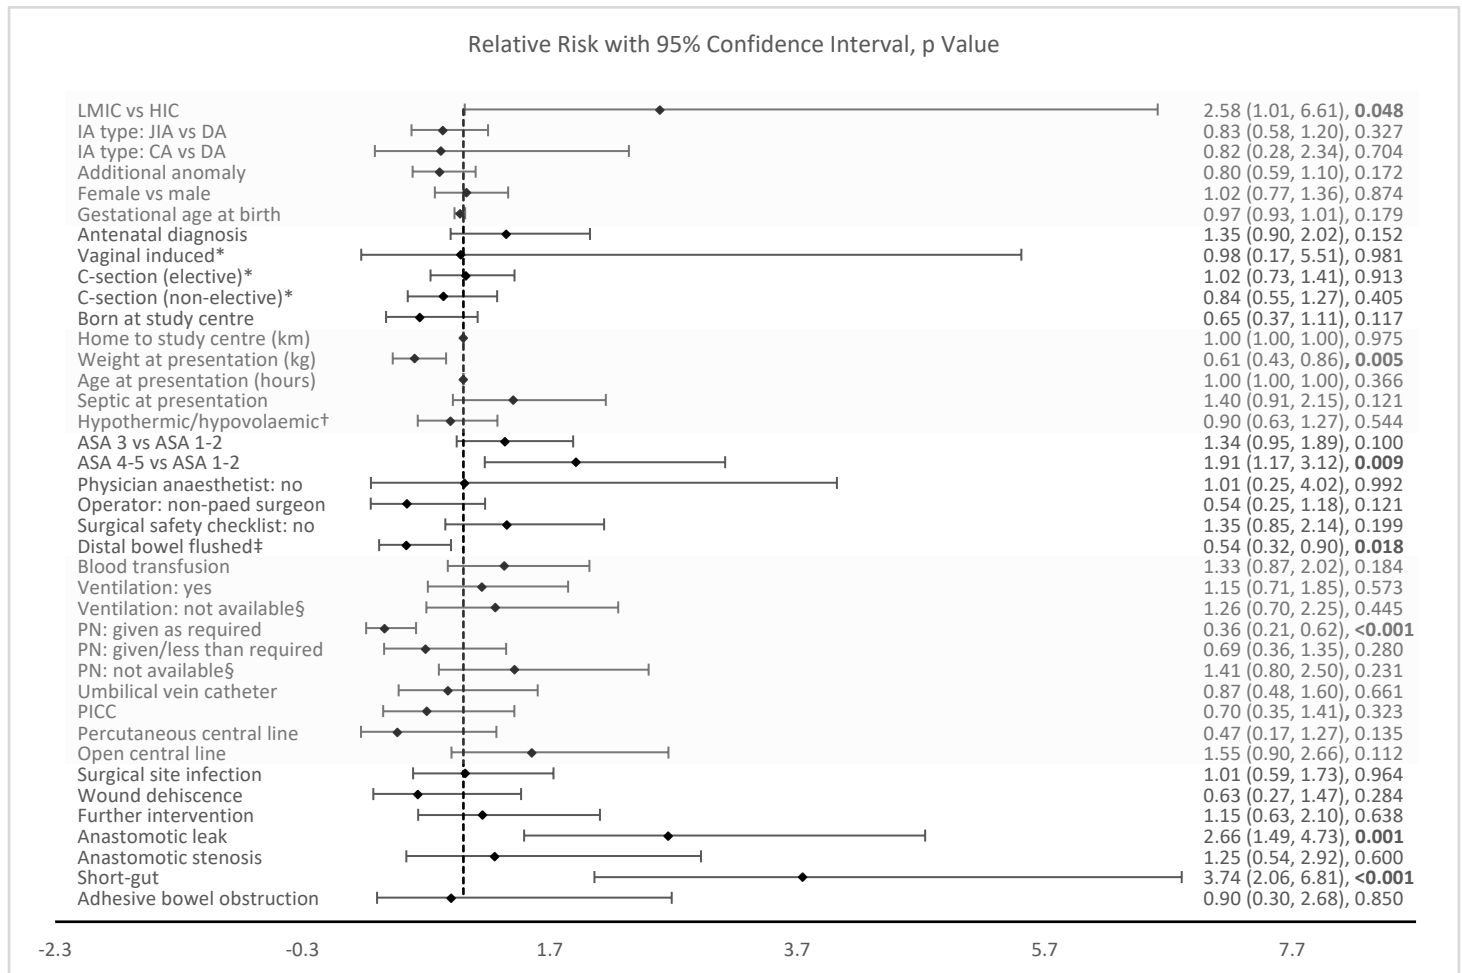

\*Vs spontaneous vaginal delivery. †At presentation. ‡Intra-operatively to check for patency. §When required. ASA: American Society of Anesthesiologists score at primary surgical intervention. CA: Colonic atresia. C-section: Caesarean section. DA: Duodenal atresia. HIC: High-income country. IA: Intestinal atresia. JIA: Jejunio-ileal atresia. LMIC: Low- or middle-income country. PICC: Peripherally inserted central catheter. PN: Parenteral nutrition. Further intervention: Need for unplanned re-intervention within 30 days of surgery. Additional anomaly includes additional study condition(s) if present. Figure shading demarcates the variables into the following groups, respectively: demographics, antenatal care and birth, distance from home to study hospital and clinical condition at presentation, intra-operative factors, perioperative factors, and secondary outcomes and condition-specific complications. Of the 681 study patients with intestinal atresia, 659 were included within this multivariable model (n=22 excluded due to missing data).

**Supplementary Figure 6: Multivariable analyses of factors affecting mortality for patients with gastroschisis**

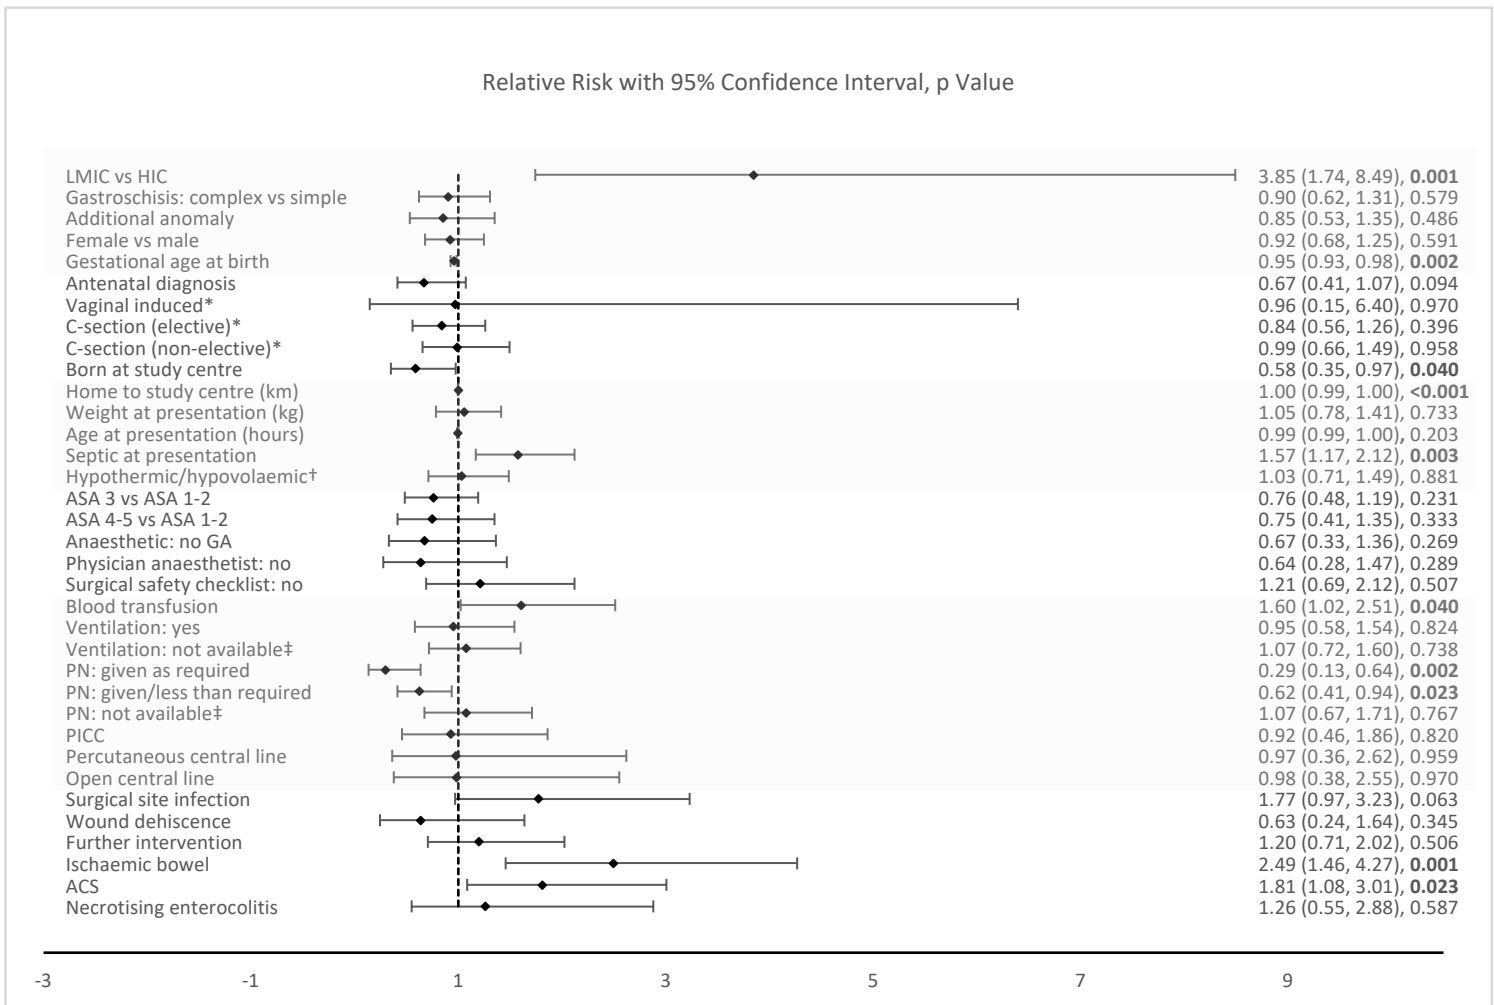

\*Vs spontaneous vaginal delivery. †At presentation. ‡When required. ACS: Abdominal compartment syndrome. ASA: American Society of Anesthesiologists score at primary surgical intervention. C-section: Caesarean section. HIC: High-income country. LMIC: Low- or middle-income country. PICC: Peripherally inserted central catheter. PN: Parenteral nutrition. Further intervention: Need for unplanned re-intervention within 30 days of surgery. Additional anomaly includes additional study condition(s) if present. Figure shading demarcates the variables into the following groups, respectively: demographics, antenatal care and birth, distance from home to study hospital and clinical condition at presentation, intra-operative factors, perioperative factors, and secondary outcomes and condition-specific complications. Of the 453 study patients with gastroschisis, 441 were included within this multivariable model (n=12 excluded due to missing data).

**Supplementary Figure 7: Multivariable analyses of factors affecting mortality for patients with exomphalos**

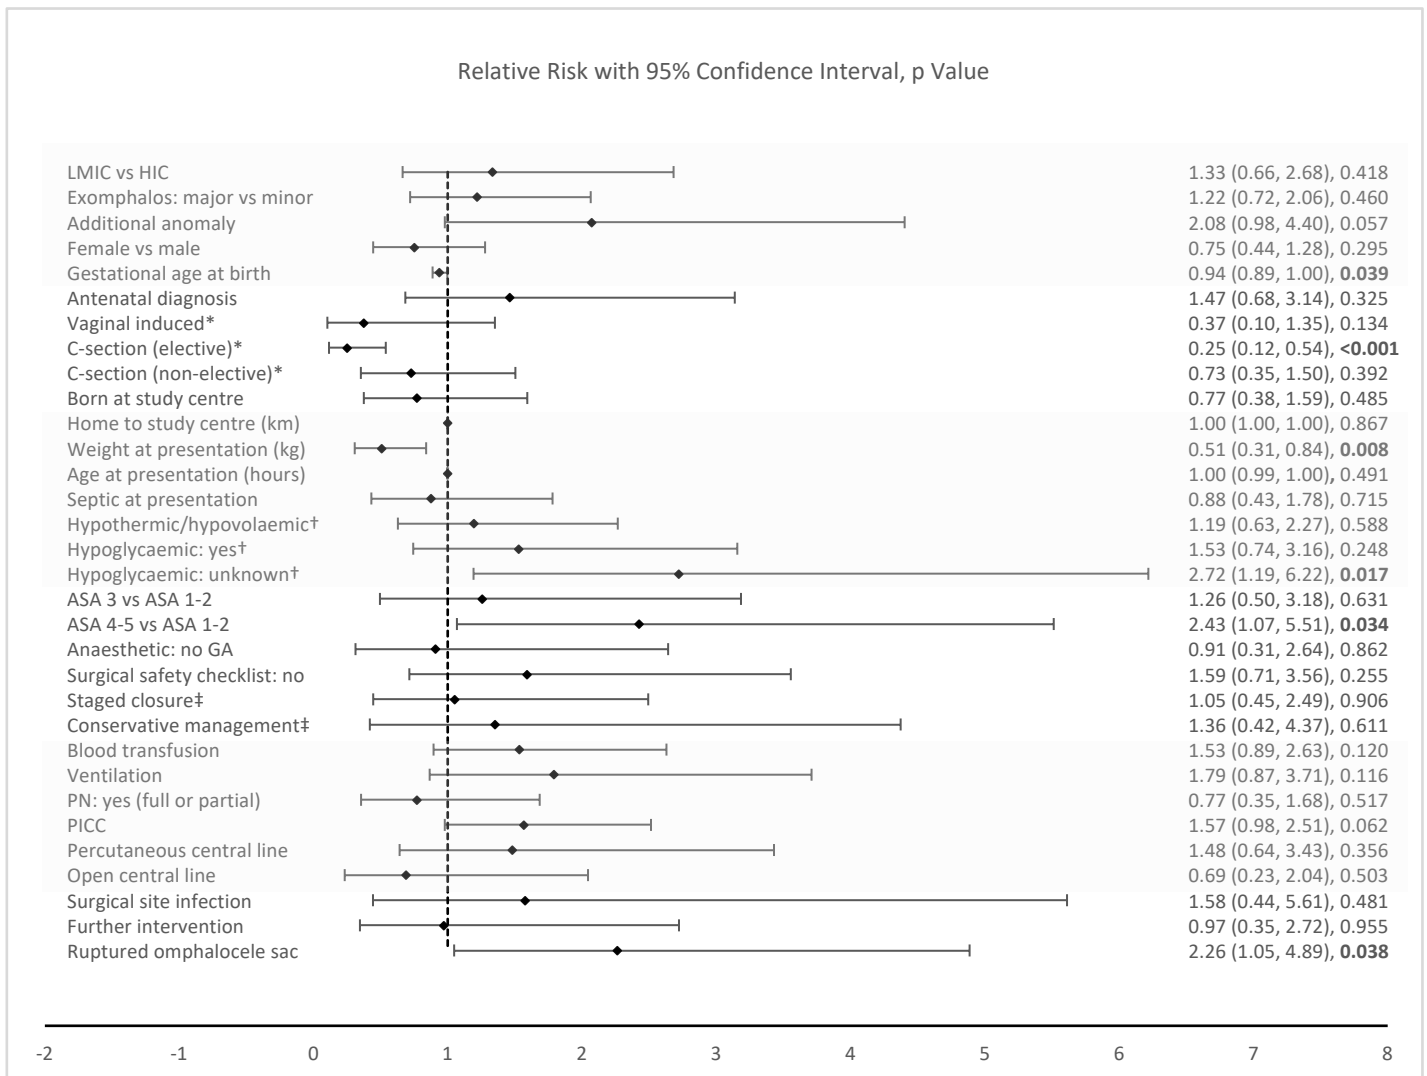

\*Vs spontaneous vaginal delivery. †At presentation. ‡Vs primary operative closure. ACS: Abdominal compartment syndrome. ASA: American Society of Anesthesiologists score at primary surgical intervention. C-section: Caesarean section. HIC: High-income country. LMIC: Low- or middle-income country. PICC: Peripherally inserted central catheter. PN: Parenteral nutrition. Further intervention: Need for unplanned re-intervention within 30 days of surgery. Additional anomaly includes additional study condition(s) if present. Figure shading demarcates the variables into the following groups, respectively: demographics, antenatal care and birth, distance from home to study hospital and clinical condition at presentation, intra-operative factors, perioperative factors, and secondary outcomes and condition-specific complications. Of the 325 study patients with exomphalos, 293 were included within this multivariable model (n=32 excluded due to missing data).

### Supplementary Figure 8: Multivariable analyses of factors affecting mortality for patients with anorectal malformation

Relative Risk with 95% Confidence Interval, p Value

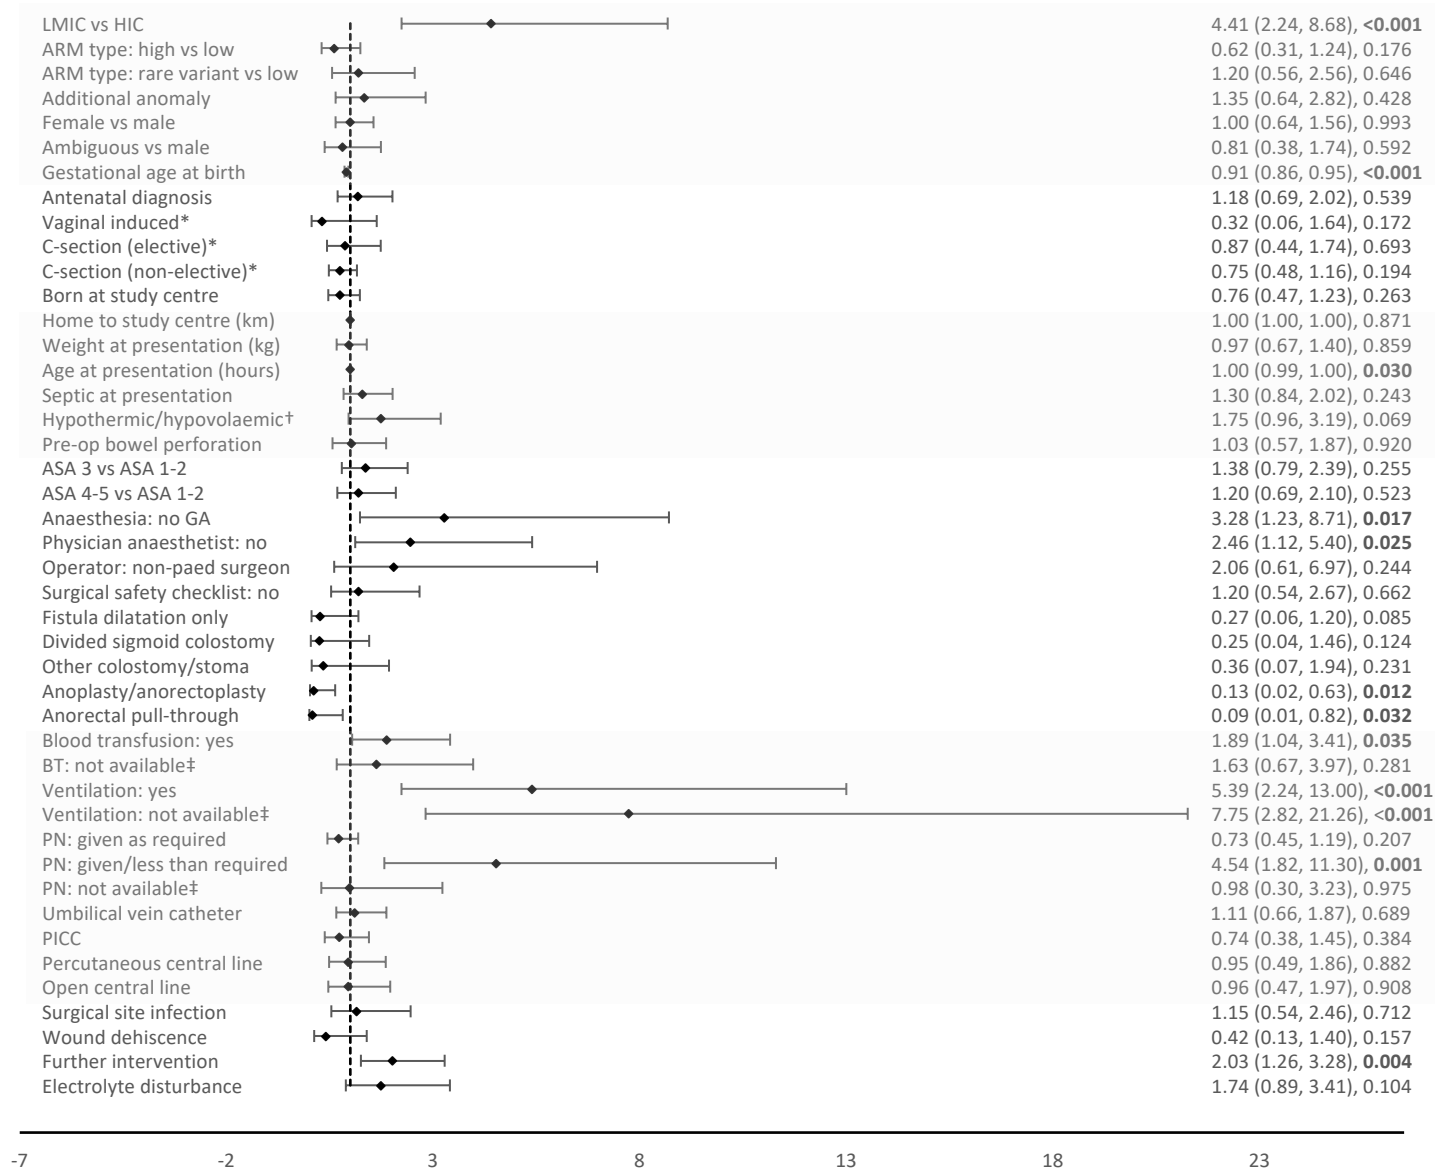

\*Vs spontaneous vaginal delivery. †At presentation. ‡When required. ARM: Anorectal malformation. ASA: American Society of Anesthesiologists score at primary surgical intervention. C-section: Caesarean section. HIC: High-income country. LMIC: Low- or middle-income country. PICC: Peripherally inserted central catheter. PN: Parenteral nutrition. Further intervention: Need for unplanned re-intervention within 30 days of surgery. Additional anomaly includes additional study condition(s) if present. Figure shading demarcates the variables into the following groups, respectively: demographics, antenatal care and birth, distance from home to study hospital and clinical condition at presentation, intra-operative factors, perioperative factors, and secondary outcomes and condition-specific complications. Of the 991 study patients with ARM, 952 were included within this multivariable model (n=39 excluded due to missing data).

### Supplementary Figure 9: Multivariable analyses of factors affecting mortality for patients with Hirschsprung's Disease

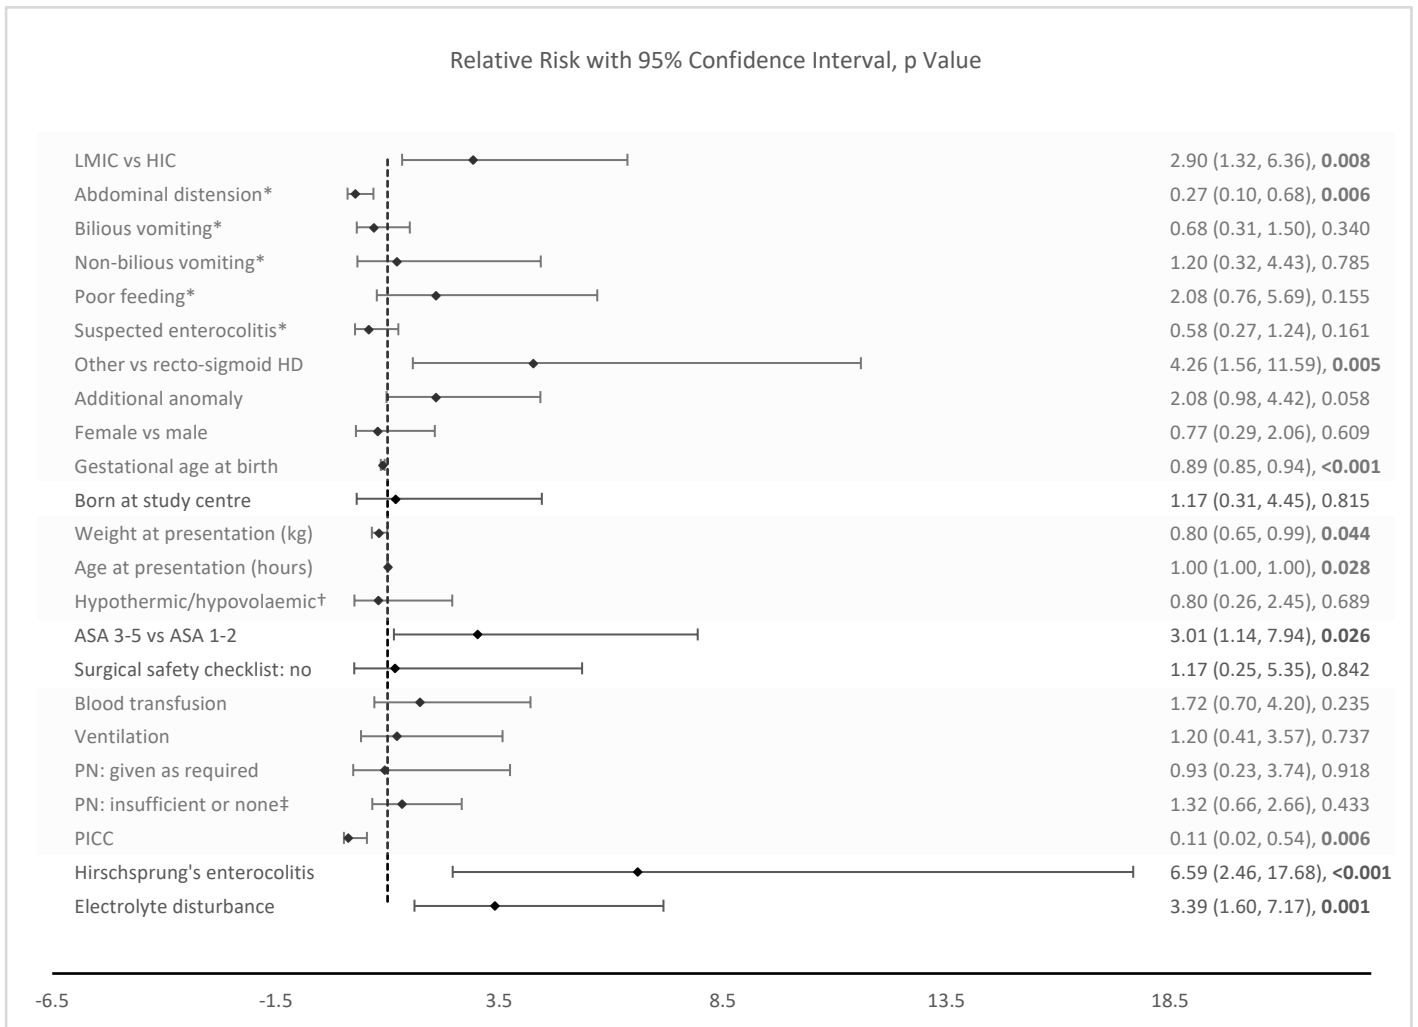

\*Symptom at presentation. †At presentation. ‡When required. ASA: American Society of Anesthesiologists score at primary surgical intervention. HD: Hirschsprung's disease. HIC: High-income country. LMIC: Low- or middle-income country. PICC: Peripherally inserted central catheter. PN: Parenteral nutrition. Further intervention: Need for unplanned re-intervention within 30 days of surgery. Additional anomaly includes additional study condition(s) if present. Surgical intervention could not be included in the multivariable model because there were no deaths in the primary pull-through group (0/109). Figure shading demarcates the variables into the following groups, respectively: demographics, birth place, condition at presentation, intra-operative factors, perioperative factors, and condition-specific complications. Of the 517 study patients with Hirschsprung's disease, 494 were included within this multivariable model (n=23 excluded due to missing data).



**Supplementary Table 18: Secondary outcomes**

| Variable                                                          | Total (n=3849)<br>n, % (95% CI)   | HIC (n=896)<br>n, % (95% CI)   | MIC (n=2860)<br>n, % (95% CI)     | LIC (n=93)<br>n, % (95% CI)      | P value*         |
|-------------------------------------------------------------------|-----------------------------------|--------------------------------|-----------------------------------|----------------------------------|------------------|
| <b>30-day post-intervention mortality:</b>                        | 681,<br><b>17.7%</b> (16.5, 18.9) | 50,<br><b>5.6%</b> (4.3, 7.3)  | 594,<br><b>20.8%</b> (19.3, 22.3) | 37,<br><b>39.8%</b> (30.4, 50.0) | <b>&lt;0.001</b> |
| <b>Surgical site infection:</b>                                   |                                   |                                |                                   |                                  |                  |
| Yes                                                               | 335, <b>10.2%</b> (9.2, 11.3)     | 76, <b>9.5%</b> (7.6, 11.7)    | 253, <b>10.5%</b> (9.3, 11.8)     | 6, <b>9.4%</b> (4.2, 19.7)       | 0.407            |
| No                                                                | 2942, <b>89.8%</b> (88.7, 90.8)   | 728, <b>90.6%</b> (88.3, 92.4) | 2156, <b>89.5%</b> (88.2, 90.7)   | 58, <b>90.6%</b> (80.3, 95.6)    | -                |
| Not applicable, no superficial wound                              | 569                               | 92                             | 448                               | 29                               | -                |
| <b>Full thickness wound dehiscence:</b>                           |                                   |                                |                                   |                                  |                  |
| Yes                                                               | 102, <b>3.1%</b> (2.6, 3.8)       | 12, <b>1.5%</b> (0.8, 2.6)     | 89, <b>3.7%</b> (3.0, 4.5)        | 1, <b>1.6%</b> (0.2, 11.1)       | <b>0.003</b>     |
| No                                                                | 3178, <b>96.9%</b> (96.2, 97.4)   | 792, <b>98.5%</b> (97.4, 99.2) | 2325, <b>96.3%</b> (95.5, 97.0)   | 61, <b>98.4%</b> (88.9, 99.8)    | -                |
| Not applicable, no full thickness wound                           | 566                               | 92                             | 443                               | 31                               | -                |
| <b>Further unplanned intervention:</b>                            |                                   |                                |                                   |                                  |                  |
| Yes - percutaneous intervention                                   | 53, <b>1.5%</b> (1.2, 2.0)        | 25, <b>3.0%</b> (2.0, 4.3)     | 28, <b>1.1%</b> (0.7, 1.6)        | 0, <b>0.0%</b>                   | <b>0.047</b>     |
| Yes - surgical intervention                                       | 400, <b>11.4%</b> (10.4, 12.5)    | 92, <b>10.9%</b> (9.0, 13.2)   | 298, <b>11.5%</b> (10.3, 13.0)    | 10, <b>15.6%</b> (8.5, 27.0)     | -                |
| No                                                                | 3045, <b>87.1%</b> (85.9, 88.1)   | 728, <b>86.2%</b> (83.7, 88.3) | 2263, <b>87.4%</b> (86.1, 88.6)   | 54, <b>84.4%</b> (73.0, 91.5)    | -                |
| Not applicable, no primary intervention                           | 347                               | 51                             | 267                               | 29                               | -                |
| <b>Hospital stay amongst survivors (days), median (IQR):†</b>     | 15 (8, 25)                        | 20 (12, 30)                    | 14 (8, 23)                        | 9 (5, 18)                        | <b>&lt;0.001</b> |
| <b>Hospital stay amongst non-survivors (days), median (IQR):†</b> | 6 (2, 13)                         | 9 (3, 15)                      | 6 (2, 13)                         | 6 (3, 12)                        | 0.280            |

\*p values represent univariable testing between income country strata. †patients still in hospital at 30-days following admission (n=560) were included as 30. HIC: High-income country. IQR: Interquartile range. LIC: Low-income country. MIC: Middle-income country.

**Supplementary Figure 10: Causes of death, % (no. of patients)**

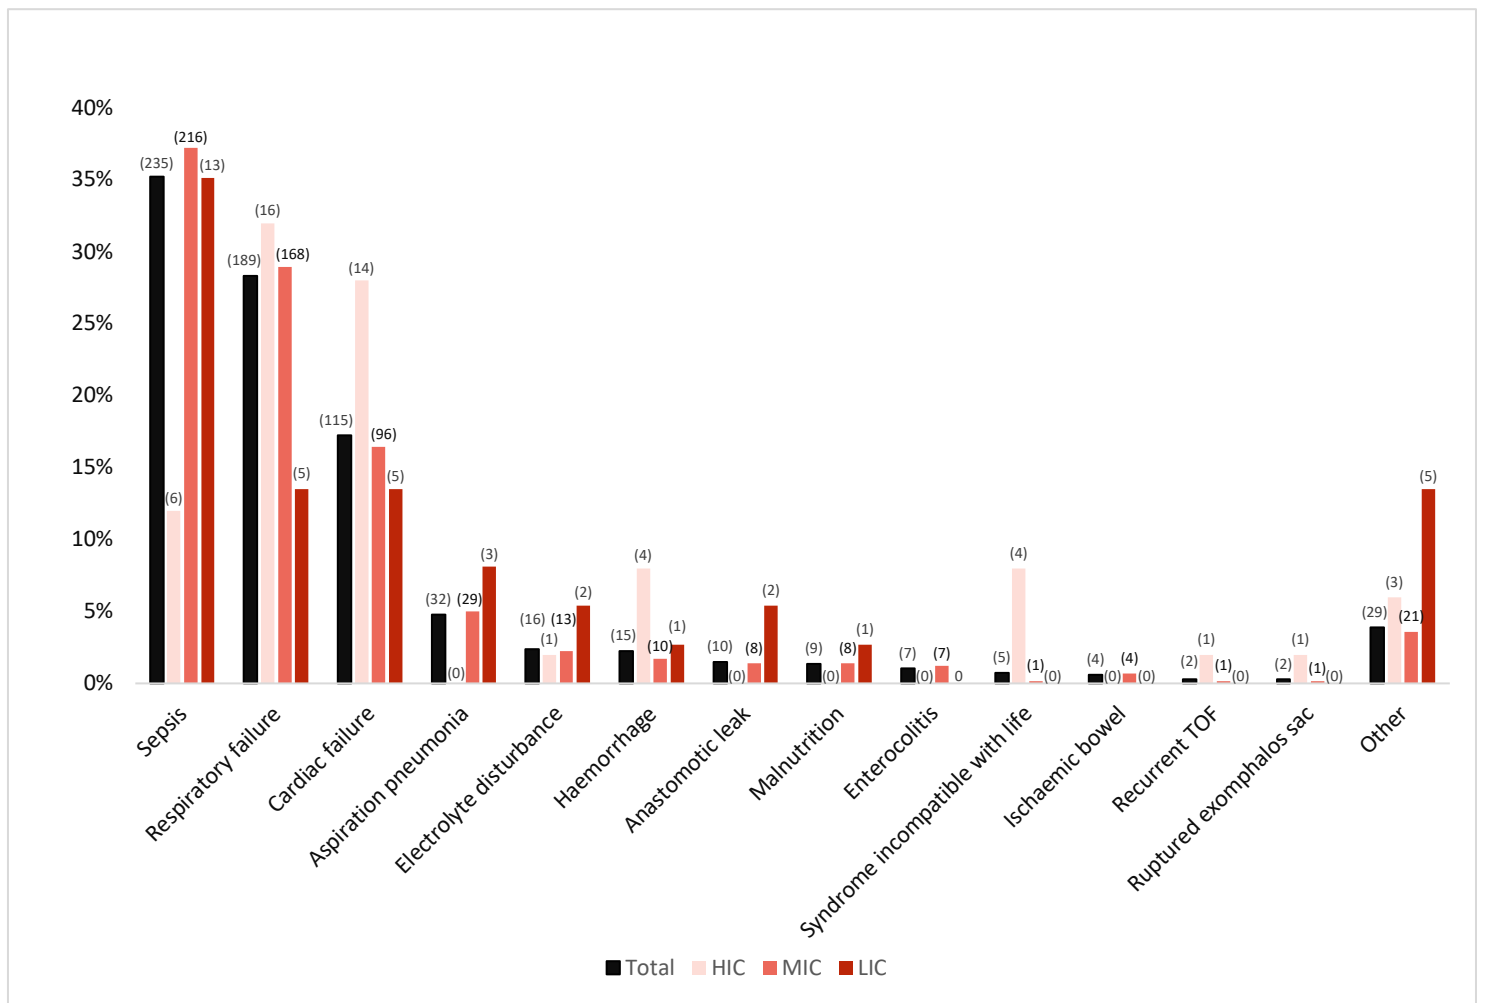

HIC: High-income countries. LIC: Low-income countries. MIC: Middle-income countries. TOF: Tracheo-oesophageal fistula.

**Supplementary Table 19: Validation of the patient data**  
(64 patients with 66 study conditions from 21 hospitals [9 HIC, 11 MIC, 1 LIC] in 17 countries and 5 languages [English, Spanish, Portuguese, German and Lithuanian])

| Variable being validated                                                            | N  | Observed agreement | Expected agreement | Kappa* | SE    |
|-------------------------------------------------------------------------------------|----|--------------------|--------------------|--------|-------|
| <b>Generic variables for all patients:</b>                                          |    |                    |                    |        |       |
| During which month did the patient present to your hospital?                        | 64 | 98%                | 20%                | 0.98   | 0.060 |
| Sex                                                                                 | 64 | 100%               | 52%                | 1.00   | 0.125 |
| Did the patient survive to discharge?                                               | 64 | 98%                | 73%                | 0.94   | 0.125 |
| Did the patient require a further unplanned intervention?                           | 64 | 80%                | 57%                | 0.53   | 0.095 |
| What study condition does this patient have? (choice=Oesophageal atresia)           | 64 | 100%               | 78%                | 1.00   | 0.125 |
| What study condition does this patient have? (choice=CDH)                           | 64 | 100%               | 78%                | 1.00   | 0.125 |
| What study condition does this patient have? (choice=Intestinal atresia)            | 64 | 100%               | 66%                | 1.00   | 0.125 |
| What study condition does this patient have? (choice=Gastroschisis)                 | 64 | 100%               | 81%                | 1.00   | 0.125 |
| What study condition does this patient have? (choice=Exomphalos/ Omphalocele)       | 64 | 98%                | 77%                | 0.93   | 0.125 |
| What study condition does this patient have? (choice=Anorectal malformation)        | 64 | 100%               | 66%                | 1.00   | 0.125 |
| What study condition does this patient have? (choice=Hirschsprung's Disease)        | 64 | 100%               | 81%                | 1.00   | 0.125 |
| <b>Condition specific variables:</b>                                                |    |                    |                    |        |       |
| <b>Oesophageal atresia (n=8):</b>                                                   |    |                    |                    |        |       |
| Type of OA +/- TOF (Gross classification)                                           | 8  | 100%               | 78%                | 1.00   | 0.354 |
| Long or short gap?                                                                  | 8  | 63%                | 48%                | 0.27   | 0.210 |
| Primary intervention (choice=TOF ligation)                                          | 8  | 63%                | 50%                | 0.25   | 0.342 |
| Primary intervention (choice=Oesophageal anastomosis)                               | 8  | 100%               | 78%                | 1.00   | 0.354 |
| Primary intervention (choice=Oesophagostomy)                                        | 8  | 100%               | -                  | -      | -     |
| Primary intervention (choice=Gastrostomy)                                           | 8  | 100%               | -                  | -      | -     |
| Primary intervention (choice=Ligation of the distal oesophagus)                     | 8  | 100%               | -                  | -      | -     |
| Primary intervention (choice=Gastro-oesophageal disconnection)                      | 8  | 100%               | -                  | -      | -     |
| Primary intervention (choice=Foker technique)                                       | 8  | 100%               | -                  | -      | -     |
| Primary intervention (choice=Fundoplication)                                        | 8  | 100%               | -                  | -      | -     |
| Other (including primary intervention for other congenital anomaly)                 | 8  | 100%               | -                  | -      | -     |
| Palliative care/no intervention                                                     | 8  | 100%               | 78%                | 1.00   | 0.354 |
| Surgical approach?                                                                  | 7  | 71%                | 39%                | 0.53   | 0.237 |
| <b>Congenital diaphragmatic hernia (n=8):</b>                                       |    |                    |                    |        |       |
| Type of CDH                                                                         | 8  | 88%                | 44%                | 0.78   | 0.222 |
| Did the patient receive extracorporeal membrane oxygenation (ECMO)?                 | 8  | 100%               | 78%                | 1.00   | 0.354 |
| Primary intervention                                                                | 8  | 75%                | 44%                | 0.56   | 0.226 |
| Surgical approach                                                                   | 7  | 100%               | 55%                | 1.00   | 0.284 |
| <b>Intestinal atresia (n=14):</b>                                                   |    |                    |                    |        |       |
| Type of intestinal atresia                                                          | 14 | 93%                | 48%                | 0.86   | 0.239 |
| Classification of duodenal atresia or colonic atresia (CA)                          | 8  | 50%                | 34%                | 0.24   | 0.219 |
| Classification of jejuno-ileal (JIA) atresia                                        | 5  | 100%               | 36%                | 1.00   | 0.326 |
| Primary intervention for duodenal atresia                                           | 8  | 75%                | 56%                | 0.43   | 0.189 |
| Surgical approach for duodenal atresia                                              | 7  | 100%               | 76%                | 1.00   | 0.378 |
| Primary intervention for JIA or CA (choice=Primary anastomosis)                     | 14 | 86%                | 65%                | 0.59   | 0.244 |
| Primary intervention for JIA or CA (choice=Bowel resection)                         | 14 | 93%                | 56%                | 0.84   | 0.264 |
| Primary intervention for JIA or CA (choice=Loop stoma)                              | 14 | 100%               | 87%                | 1.00   | 0.267 |
| Primary intervention for JIA or CA (choice=Divided stoma)                           | 14 | 100%               | 87%                | 1.00   | 0.267 |
| Primary intervention for JIA or CA (choice=Division of web only)                    | 14 | 100%               | -                  | -      | -     |
| Primary intervention for JIA or CA (choice=Bishop-Koop stoma)                       | 14 | 100%               | -                  | -      | -     |
| Primary intervention for JIA or CA (choice= Santulli stoma)                         | 14 | 100%               | -                  | -      | -     |
| Primary intervention for JIA or CA (choice=Palliation)                              | 14 | 100%               | -                  | -      | -     |
| Primary intervention for JIA or CA (choice=Other)                                   | 14 | 100%               | -                  | -      | -     |
| Surgical approach JIA or CA                                                         | 4  | 100%               | -                  | -      | -     |
| <b>Gastroschisis (n=7):</b>                                                         |    |                    |                    |        |       |
| Type of gastroschisis: (choice=Simple)                                              | 7  | 100%               | 76%                | 1.00   | 0.378 |
| Type of gastroschisis: (choice=Complex: associated with atresia)                    | 7  | 100%               | 76%                | 1.00   | 0.378 |
| Type of gastroschisis: (choice=Complex: associated with necrosis)                   | 7  | 100%               | -                  | -      | -     |
| Type of gastroschisis: (choice=Complex: associated with perforation)                | 7  | 100%               | -                  | -      | -     |
| Type of gastroschisis: (choice=Complex: associated with closing gastroschisis)      | 7  | 100%               | -                  | -      | -     |
| Primary intervention                                                                | 7  | 71%                | 35%                | 0.56   | 0.239 |
| Method of defect closure                                                            | 6  | 83%                | 58%                | 0.60   | 0.279 |
| On what day following admission was abdominal wall closure achieved?                | 6  | 67%                | 22%                | 0.57   | 0.210 |
| <b>Exomphalos/ omphalocele (n=8):</b>                                               |    |                    |                    |        |       |
| Type of Exomphalos?                                                                 | 8  | 88%                | 69%                | 0.60   | 0.324 |
| Hypoglycaemic on arrival?                                                           | 8  | 88%                | 67%                | 0.62   | 0.248 |
| Primary intervention                                                                | 8  | 100%               | 41%                | 1.00   | 0.274 |
| If conservative management, was a topical treatment applied to the exomphalos sac?  | 3  | 100%               | 56%                | 1.00   | 0.577 |
| <b>Anorectal malformation (n=14):</b>                                               |    |                    |                    |        |       |
| Type of anorectal malformation (Krackenbeck classification)                         | 14 | 64%                | 16%                | 0.58   | 0.100 |
| Did the neonate have pre-operative bowel perforation?                               | 14 | 100%               | 87%                | 1.00   | 0.267 |
| What was the primary intervention undertaken? (choice=Fistula dilation: no surgery) | 14 | 100%               | 87%                | 1.00   | 0.267 |
| What was the primary intervention undertaken? (choice=Loop sigmoid colostomy)       | 14 | 100%               | 87%                | 1.00   | 0.267 |
| What was the primary intervention undertaken? (choice=Divided sigmoid colostomy)    | 14 | 71%                | 46%                | 0.47   | 0.227 |
| What was the primary intervention undertaken? (choice=Other stoma)                  | 14 | 71%                | 55%                | 0.36   | 0.206 |
| What was the primary intervention undertaken? (choice=Anoplasty)                    | 14 | 100%               | 87%                | 1.00   | 0.267 |

|                                                                                                  |    |              |              |               |       |
|--------------------------------------------------------------------------------------------------|----|--------------|--------------|---------------|-------|
| What was the primary intervention undertaken? (choice=Laparoscopic-assisted pull-through)        | 14 | 93%          | 93%          | 0.00          | 0.000 |
| What was the primary intervention undertaken? (choice=Loop transverse colostomy)                 | 14 | 100%         | -            | -             | -     |
| What was the primary intervention undertaken? (choice=Divided transverse colostomy)              | 14 | 100%         | -            | -             | -     |
| What was the primary intervention undertaken? (choice=Posterior sagittal anorectoplasty (PSARP)) | 14 | 100%         | -            | -             | -     |
| What was the primary intervention undertaken? (choice=Abdominosacroperineal pull-through)        | 14 | 100%         | -            | -             | -     |
| What was the primary intervention undertaken? (choice=Abdominoperineal pull-through)             | 14 | 100%         | -            | -             | -     |
| What was the primary intervention undertaken? (choice=Palliative care/no intervention)           | 14 | 100%         | -            | -             | -     |
| What was the primary intervention undertaken? (choice=Other)                                     | 14 | 100%         | -            | -             | -     |
| <b>Hirschsprung's Disease (n=7):</b>                                                             |    |              |              |               |       |
| Source of diagnosis of Hirschsprung's disease (choice=Mucosal biopsy)                            | 7  | 100%         | 51%          | 1.00          | 0.378 |
| Source of diagnosis of Hirschsprung's disease (choice=Full thickness biopsy)                     | 7  | 86%          | 86%          | 0.00          | 0.000 |
| Source of diagnosis of Hirschsprung's disease (choice=Barium enema)                              | 7  | 86%          | 53%          | 0.70          | 0.360 |
| Source of diagnosis of Hirschsprung's disease (choice=Not confirmed: suspected only)             | 7  | 86%          | 65%          | 0.59          | 0.344 |
| Source of diagnosis of Hirschsprung's disease (choice=Genetic)                                   | 7  | 100%         | -            | -             | -     |
| Source of diagnosis of Hirschsprung's disease (choice=Anorectal manometry)                       | 7  | 100%         | -            | -             | -     |
| Source of diagnosis of Hirschsprung's disease (choice=Other)                                     | 7  | 100%         | -            | -             | -     |
| Primary intervention                                                                             | 7  | 86%          | 24%          | 0.81          | 0.200 |
| If primary pull-through was undertaken, did the patient have a covering stoma?                   | 3  | 100%         | -            | -             | -     |
| Was it laparoscopic assisted?                                                                    | 3  | 100%         | -            | -             | -     |
| <b>Total: median (IQR)</b>                                                                       |    | <b>100%</b>  | <b>65%</b>   | <b>0.96</b>   |       |
|                                                                                                  |    | <b>(88%,</b> | <b>(48%,</b> | <b>(0.57,</b> |       |
|                                                                                                  |    | <b>100%)</b> | <b>78%)</b>  | <b>1.00)</b>  |       |

\*Kappa could not be calculated for variables where all data were confined to one category. Interpretation of kappa: <0 no agreement, 0.01-0.2 none to slight, 0.21-0.40 fair, 0.41-0.6 moderate, 0.61-0.8 substantial, 0.81-1.00 almost perfect agreement. Ten hospitals that were randomly selected for validation were unable to provide patient data retrospectively. CDH: Congenital diaphragmatic hernia. HIC: High-income countries. LIC: Low-income countries. MIC: Middle-income countries. OA: Oesophageal atresia. TOF: Tracheo-oesophageal fistula.

**Supplementary Table 20: Feedback surveys completed by local investigators at validating hospitals regarding the quality of data collection**  
(105 surveys from 27 hospitals [9 HIC, 17 MIC, 1 LIC] in 20 countries, completed in 7 languages [English, Spanish, Portuguese, German, Lithuanian, French and Turkish])

| Local investigator survey questions and responses                                                                                                                      | All<br>(n=105)<br>N (%) | HIC<br>(n=26)<br>N (%) | MIC<br>(n=72)<br>N (%) | LIC<br>(n=7)<br>N (%) |
|------------------------------------------------------------------------------------------------------------------------------------------------------------------------|-------------------------|------------------------|------------------------|-----------------------|
| <b>Do you think your team managed to identify all patients eligible for the study during the data collection period?</b>                                               |                         |                        |                        |                       |
| Yes                                                                                                                                                                    | 97 (92%)                | 24 (92%)               | 68 (94%)               | 5 (71%)               |
| No                                                                                                                                                                     | 2 (2%)                  | 0                      | 2 (3%)                 | 0                     |
| Unsure                                                                                                                                                                 | 6 (6%)                  | 2 (8%)                 | 2 (3%)                 | 2 (29%)               |
| <b>If no or unsure, what problems did you experience with identifying patients?</b>                                                                                    |                         |                        |                        |                       |
| Patient died/discharged before a study team member could assess/confirm diagnosis                                                                                      | 2                       | 0                      | 2                      | 0                     |
| No centralised system to identify eligible patients throughout the hospital                                                                                            | 1                       | 1                      | 0                      | 0                     |
| Neonatal unit is at a different hospital to the study team                                                                                                             | 1                       | 1                      | 0                      | 0                     |
| Long histology processing time – patients with Hirschsprung’s on histology could have been missed                                                                      | 1                       | 0                      | 0                      | 1                     |
| Heavy workload                                                                                                                                                         | 1                       | 0                      | 1                      | 0                     |
| <b>Could any eligible patients have been missed from study inclusion?</b>                                                                                              |                         |                        |                        |                       |
| Yes                                                                                                                                                                    | 6 (6%)                  | 3 (12%)                | 3 (4%)                 | 0                     |
| No                                                                                                                                                                     | 91 (87%)                | 22 (85%)               | 65 (90%)               | 4 (57%)               |
| Unsure                                                                                                                                                                 | 8 (8%)                  | 1 (4%)                 | 4 (6%)                 | 3 (43%)               |
| <b>If yes or unsure, how might patients have been missed from study inclusion?</b>                                                                                     |                         |                        |                        |                       |
| Patients managed by different services/departments within study hospital                                                                                               | 3                       | 2                      | 1                      | 0                     |
| Patient died/discharged before a study team member could assess/confirm diagnosis                                                                                      | 3                       | 0                      | 3                      | 0                     |
| Long histology processing time                                                                                                                                         | 2                       | 0                      | 0                      | 2                     |
| Inaccurate/missed diagnosis/ not referred to paediatric surgeons                                                                                                       | 2                       | 0                      | 2                      | 0                     |
| No antenatal diagnosis                                                                                                                                                 | 1                       | 0                      | 1                      | 0                     |
| No parental consent                                                                                                                                                    | 1                       | 0                      | 1                      | 0                     |
| Missed during registration                                                                                                                                             | 1                       | 0                      | 1                      | 0                     |
| <b>Are there any study conditions that were more likely to have been missed from study inclusion?*</b>                                                                 |                         |                        |                        |                       |
| Oesophageal atresia +/- tracheo-oesophageal fistula                                                                                                                    | 5 (5%)                  | 0                      | 5 (7%)                 | 0                     |
| Congenital diaphragmatic hernia                                                                                                                                        | 7 (7%)                  | 0                      | 7 (10%)                | 0                     |
| Intestinal atresia                                                                                                                                                     | 2 (2%)                  | 0                      | 2 (3%)                 | 0                     |
| Gastroschisis                                                                                                                                                          | 0                       | 0                      | 0                      | 0                     |
| Omphalocele/ exomphalos                                                                                                                                                | 2 (2%)                  | 1 (4%)                 | 1 (1%)                 | 0                     |
| Anorectal malformation                                                                                                                                                 | 3 (3%)                  | 1 (4%)                 | 2 (3%)                 | 0                     |
| Hirschsprung’s disease                                                                                                                                                 | 6 (6%)                  | 0                      | 4 (6%)                 | 2 (29%)               |
| None of the above                                                                                                                                                      | 88 (84%)                | 25 (96%)               | 59 (82%)               | 4 (57%)               |
| <b>If you selected any of the above conditions, why was this the case?</b>                                                                                             |                         |                        |                        |                       |
| Missed/difficult diagnosis due to poor diagnostic tools, low index of suspicion, management by non-surgical teams without experience with such conditions              | 5                       | 0                      | 5                      | 0                     |
| Patient died/discharged before a study team member reviewed patient/made diagnosis (including those conservatively managed by medical teams)                           | 3                       | 1                      | 2                      | 0                     |
| Prolonged histology time for patients with suspected Hirschsprung’s disease                                                                                            | 2                       | 0                      | 0                      | 2                     |
| Patients managed by different services/departments                                                                                                                     | 1                       | 0                      | 1                      | 0                     |
| <b>How did you identify patients to include in the study?*</b>                                                                                                         |                         |                        |                        |                       |
| Ward patient lists                                                                                                                                                     | 52 (50%)                | 12 (46%)               | 36 (50%)               | 4 (57%)               |
| Ward round                                                                                                                                                             | 50 (48%)                | 8 (31%)                | 36 (50%)               | 6 (86%)               |
| Operating room logbook                                                                                                                                                 | 40 (38%)                | 5 (19%)                | 33 (46%)               | 2 (29%)               |
| Planned operation lists                                                                                                                                                | 39 (37%)                | 9 (35%)                | 25 (35%)               | 5 (71%)               |
| Handover                                                                                                                                                               | 38 (36%)                | 10 (38%)               | 23 (32%)               | 5 (71%)               |
| Personal knowledge of patients                                                                                                                                         | 36 (34%)                | 8 (31%)                | 25 (35%)               | 3 (43%)               |
| Word of mouth                                                                                                                                                          | 18 (17%)                | 4 (15%)                | 8 (11%)                | 6 (86%)               |
| Other                                                                                                                                                                  | 11 (10%)                | 5 (19%)                | 6 (8%)                 | 0                     |
| <b>If other, please provide further detail:</b>                                                                                                                        |                         |                        |                        |                       |
| ICD codes                                                                                                                                                              | 4                       | 4                      | 0                      | 0                     |
| Clinics/ Emergency Room                                                                                                                                                | 2                       | 0                      | 2                      | 0                     |
| Referrals by paediatricians/other doctors                                                                                                                              | 2                       | 0                      | 2                      | 0                     |
| Hospital computer system data                                                                                                                                          | 1                       | 0                      | 1                      | 0                     |
| Neonatology logbook                                                                                                                                                    | 1                       | 1                      | 0                      | 0                     |
| <b>When you/ study team members were not present, were you able to identify all the patients to be included in the study on those days?</b>                            |                         |                        |                        |                       |
| Yes                                                                                                                                                                    | 87 (83%)                | 22 (85%)               | 59 (82%)               | 6 (86%)               |
| No                                                                                                                                                                     | 2 (2%)                  | 0                      | 2 (3%)                 | 0                     |
| Unsure                                                                                                                                                                 | 5 (5%)                  | 2 (8%)                 | 3 (4%)                 | 0                     |
| Not applicable                                                                                                                                                         | 11 (11%)                | 2 (8%)                 | 8 (11%)                | 1 (14%)               |
| <b>How did you identify patients to be included in the study on days when you and the other Global PaedSurg local investigators were not present at the hospital?*</b> |                         |                        |                        |                       |
| Admission logs/patients register                                                                                                                                       | 31 (30%)                | 9 (35%)                | 21 (29%)               | 1 (14%)               |
| Handover                                                                                                                                                               | 19 (18%)                | 3 (12%)                | 16 (22%)               | 0                     |
| Word of mouth                                                                                                                                                          | 14 (13%)                | 2 (8%)                 | 7 (10%)                | 5 (71%)               |
| Ward rounds                                                                                                                                                            | 7 (7%)                  | 1 (4%)                 | 4 (6%)                 | 2 (29%)               |
| Operating room logbook                                                                                                                                                 | 7 (7%)                  | 3 (12%)                | 4 (6%)                 | 0                     |
| Billing department/ICD codes                                                                                                                                           | 2 (2%)                  | 2 (8%)                 | 0                      | 0                     |
| Prenatal diagnosis                                                                                                                                                     | 1 (1%)                  | 1 (4%)                 | 0                      | 0                     |

|                                                                                                                                                           |           |          |          |          |
|-----------------------------------------------------------------------------------------------------------------------------------------------------------|-----------|----------|----------|----------|
| Not applicable (one collaborator is always present/substitute was appointed)                                                                              | 44 (4%)   | 8 (31%)  | 34 (32%) | 2 (29%)  |
| <b>Do you have any concerns regarding the accuracy of the data collected on the patients included in the study?</b>                                       |           |          |          |          |
| Yes                                                                                                                                                       | 0         | 0        | 0        | 0        |
| No                                                                                                                                                        | 101 (96%) | 25 (96%) | 69 (96%) | 7 (100%) |
| Unsure                                                                                                                                                    | 4 (4%)    | 1 (4%)   | 3 (4%)   | 0        |
| <b>If yes or unsure, what data points might be inaccurate and what were the challenges for collecting this data?</b>                                      |           |          |          |          |
| Some patients left the hospital before the diagnosis/ investigations were complete                                                                        | 1         | 0        | 1        | 0        |
| Conditions such as ARM with perineal fistula require expert surgical diagnosis which might not be available for the neonatology team managing the patient | 1         | 0        | 1        | 0        |
| Human error in data collection                                                                                                                            | 1         | 1        | 0        | 0        |
| No antenatal record cards for antenatal data                                                                                                              | 1         | 0        | 1        | 0        |
| <b>Were any of the data points more difficult to collect accurately? If so, which ones and why?</b>                                                       |           |          |          |          |
| None                                                                                                                                                      | 81        | 22       | 56       | 3        |
| Diagnosis: lack of expert input/ classification not normally used by the study team/ histology time                                                       | 5         | 0        | 2        | 3        |
| Missing data within patient registers/notes (i.e means of transport to the hospital)                                                                      | 5         | -        | 5        | -        |
| Distance from hospital difficult to calculate for patients from rural regions not on the map                                                              | 4         | 1        | 3        | -        |
| Patient follow up – difficult to 30-days post intervention                                                                                                | 3         | 2        | 0        | 1        |
| Lack of information from referring centres/ information regarding care prior to arrival                                                                   | 3         | 1        | 2        | -        |
| Specific data from prescriptions such as number of days on parenteral nutrition                                                                           | 2         | 0        | 2        | 0        |
| Gestational age at birth – some parents were unsure                                                                                                       | 1         | 0        | 1        | 0        |
| Lack of equipment i.e no neonatal blood pressure cuff                                                                                                     | 1         | -        | 1        | -        |
| Time from birth to presentation sometimes difficult to calculate                                                                                          | 1         | -        | 1        | -        |
| Antenatal care information – not always available                                                                                                         | 1         | -        | 1        | -        |

\*Denominator is the number of completed surveys as more than one answer could be selected. Percentages not calculated for data from free text boxes. Percentages have been rounded and may not total 100. At four validating hospitals a feedback survey was not completed by study collaborators. HIC: High-income countries. ICD: International Classification of Diseases. LIC: Low-income countries. MIC: Middle-income countries.

**Supplementary Table 21: Feedback surveys completed by validating local investigators**  
(31 surveys from 31 hospitals [12 HIC, 18 MIC, 1 LIC] in 20 countries, completed in 6 languages [English, Spanish, Portuguese, German, Lithuanian and Turkish])

| Validator survey questions and responses                                                                                                                                                                                                                             | All<br>(n=31)<br>N (%) | HIC<br>(n=12)<br>N (%) | MIC<br>(n=18)<br>N (%) | LIC<br>(n=1)<br>N (%) |
|----------------------------------------------------------------------------------------------------------------------------------------------------------------------------------------------------------------------------------------------------------------------|------------------------|------------------------|------------------------|-----------------------|
| <b>Do you think your team managed to identify and include all eligible patients for the study during the data collection period?</b>                                                                                                                                 |                        |                        |                        |                       |
| Yes                                                                                                                                                                                                                                                                  | 29 (93%)               | 12 (100%)              | 16 (89%)               | 1 (100%)              |
| No                                                                                                                                                                                                                                                                   | 1 (3%)                 | 0                      | 1 (6%)                 | 0                     |
| Unsure                                                                                                                                                                                                                                                               | 1 (3%)                 | 0                      | 1 (6%)                 | 0                     |
| <b>If you answered no or unsure, what problems might they have experienced when trying to identify patients?</b>                                                                                                                                                     |                        |                        |                        |                       |
| Patients managed by different services/departments within study hospital                                                                                                                                                                                             | 1                      | 0                      | 1                      | 0                     |
| <b>Have you managed to identify any additional patients that were eligible for the study, but were not included in the original data collection?</b>                                                                                                                 |                        |                        |                        |                       |
| Yes                                                                                                                                                                                                                                                                  | 2 (6%)                 | 0                      | 2 (11%)                | 0                     |
| No                                                                                                                                                                                                                                                                   | 29 (94%)               | 12 (100%)              | 16 (89%)               | 1 (100%)              |
| <b>If yes, through what sources were you able to identify additional patients? Why do you think these patients might have been missed from study inclusion?</b>                                                                                                      |                        |                        |                        |                       |
| Hospital admission staff e.g. paediatric and surgical residents triaging patients                                                                                                                                                                                    | 1                      | 0                      | 1                      | 0                     |
| Admission records on the ward                                                                                                                                                                                                                                        | 1                      | 0                      | 1                      | 0                     |
| <b>Are there any study conditions that were more likely to have been missed from study inclusion?*</b>                                                                                                                                                               |                        |                        |                        |                       |
| Oesophageal atresia                                                                                                                                                                                                                                                  | 3 (10%)                | 1 (8%)                 | 2 (11%)                | 0                     |
| Congenital diaphragmatic hernia                                                                                                                                                                                                                                      | 3 (10%)                | 0                      | 3 (17%)                | 0                     |
| Intestinal atresia                                                                                                                                                                                                                                                   | 3 (10%)                | 1                      | 2 (11%)                | 0                     |
| Gastroschisis                                                                                                                                                                                                                                                        | 2 (6%)                 | 0                      | 2 (11%)                | 0                     |
| Omphalocele/Exomphalos                                                                                                                                                                                                                                               | 4 (13%)                | 1 (8%)                 | 3 (17%)                | 0                     |
| Anorectal malformation                                                                                                                                                                                                                                               | 6 (19%)                | 3 (25%)                | 3 (17%)                | 0                     |
| Hirschsprung's disease                                                                                                                                                                                                                                               | 18 (58%)               | 6 (50%)                | 11 (61%)               | 1 (100%)              |
| <b>If you selected any of the above conditions, why might this have been the case?</b>                                                                                                                                                                               |                        |                        |                        |                       |
| Late diagnosis due to complex diagnosis/mild presentation/traised as another diagnosis                                                                                                                                                                               | 14                     | 6                      | 8                      | 0                     |
| Histopathological delay                                                                                                                                                                                                                                              | 4                      | 0                      | 3                      | 1                     |
| Patients managed by different services/departments within study hospital                                                                                                                                                                                             | 1                      | 0                      | 1                      | 0                     |
| Validator forced to select an option due to survey design                                                                                                                                                                                                            | 9                      | 4                      | 5                      | 0                     |
| <b>What sources did you utilise to check whether all patients had been included in the study?*</b>                                                                                                                                                                   |                        |                        |                        |                       |
| Operating room log book                                                                                                                                                                                                                                              | 19 (61%)               | 7 (58%)                | 11 (61%)               | 1 (100%)              |
| Ward patient lists                                                                                                                                                                                                                                                   | 16 (52%)               | 4 (33%)                | 11 (61%)               | 1 (100%)              |
| Admission records                                                                                                                                                                                                                                                    | 13 (42%)               | 3 (25%)                | 9 (50%)                | 1 (100%)              |
| Personal knowledge of patients                                                                                                                                                                                                                                       | 11 (35%)               | 3 (25%)                | 7 (39%)                | 1 (100%)              |
| Word of mouth/ discussion with colleagues                                                                                                                                                                                                                            | 10 (32%)               | 5 (42%)                | 4 (22%)                | 1 (100%)              |
| Elective operation lists                                                                                                                                                                                                                                             | 6 (19%)                | 4 (33%)                | 2 (11%)                | 0                     |
| Other                                                                                                                                                                                                                                                                | 6 (19%)                | 3 (25%)                | 3 (17%)                | 0                     |
| <b>If other, please provide further detail:</b>                                                                                                                                                                                                                      |                        |                        |                        |                       |
| Electronic medical records or database                                                                                                                                                                                                                               | 5                      | 3                      | 2                      | 0                     |
| NICU/PICU admission register & neonatal ward register                                                                                                                                                                                                                | 1                      | 0                      | 1                      | 0                     |
| <b>If the Global PaedSurg local investigators at your centre were not present at the hospital for one or more of the days during the data collection period, do you think they were able to identify all the patients to be included in the study on those days?</b> |                        |                        |                        |                       |
| Yes                                                                                                                                                                                                                                                                  | 27 (87%)               | 12 (100%)              | 14 (78%)               | 1 (100%)              |
| No                                                                                                                                                                                                                                                                   | 1 (3%)                 | 0                      | 1 (6%)                 | 0                     |
| Unsure                                                                                                                                                                                                                                                               | 3 (10%)                | 0                      | 3 (17%)                | 0                     |
| <b>How would they identify patients to be included in the study on days when they were not present at the hospital?</b>                                                                                                                                              |                        |                        |                        |                       |
| Discussion/updates from colleagues                                                                                                                                                                                                                                   | 11 (36%)               | 4 (33%)                | 7 (39%)                | 0                     |
| Electronic medical records or databases                                                                                                                                                                                                                              | 7 (23%)                | 6 (50%)                | 1 (6%)                 | 0                     |
| Not applicable: as a collaborator always present                                                                                                                                                                                                                     | 5 (16%)                | 1 (8%)                 | 4 (22%)                | 0                     |
| Hospital/ward records or operation room logbook                                                                                                                                                                                                                      | 5 (16%)                | 1 (8%)                 | 4 (22%)                | 0                     |
| Admission records                                                                                                                                                                                                                                                    | 2 (7%)                 | 0                      | 1 (6%)                 | 1 (100%)              |
| Outpatient clinic                                                                                                                                                                                                                                                    | 1 (3%)                 | 0                      | 1 (6%)                 | 0                     |
| <b>Do you have any concerns regarding the accuracy of the data collected on the patients included in the study?</b>                                                                                                                                                  |                        |                        |                        |                       |
| Yes                                                                                                                                                                                                                                                                  | 2 (7%)                 | 1 (8%)                 | 1 (6%)                 | 0                     |
| No                                                                                                                                                                                                                                                                   | 28 (90%)               | 11 (92%)               | 16 (89%)               | 1 (100%)              |
| Unsure                                                                                                                                                                                                                                                               | 1 (3%)                 | 0                      | 1 (6%)                 | 0                     |
| <b>If yes or unsure, what data points might be inaccurate and what were the challenges for collecting this data?</b>                                                                                                                                                 |                        |                        |                        |                       |
| Operative findings - information was missing from the operation reports, with inferences made based on procedure performed                                                                                                                                           | 1                      | 1                      | 0                      | 0                     |
| Month of the data collection – patients sometimes included in month corresponding to procedure date, not admission date                                                                                                                                              | 1                      | 0                      | 1                      | 0                     |
| Poor documentation – requiring in-person discussion with responsible clinician in order to clarify certain points                                                                                                                                                    | 1                      | 0                      | 1                      | 0                     |
| <b>Were any of the data points more difficult to collect accurately?</b>                                                                                                                                                                                             |                        |                        |                        |                       |
| Yes                                                                                                                                                                                                                                                                  | 7 (23%)                | 4 (33%)                | 3 (17%)                | 0                     |
| No                                                                                                                                                                                                                                                                   | 24 (77%)               | 8 (67%)                | 15 (83%)               | 1 (100%)              |

|                                                                                                                                                                                                 |          |          |           |          |
|-------------------------------------------------------------------------------------------------------------------------------------------------------------------------------------------------|----------|----------|-----------|----------|
| <b>If so, which ones and why?</b>                                                                                                                                                               |          |          |           |          |
| CVC placement – overcome by reviewing patient data e.g. radiology                                                                                                                               | 1        | 1        | 0         | 0        |
| Operative findings – poor documentation                                                                                                                                                         | 1        | 1        | 0         | 0        |
| Gastroschisis definitions – may be interpreted differently by different observers                                                                                                               | 1        | 1        | 0         | 0        |
| Distance to hospital – inferred from most direct route to hospital                                                                                                                              | 1        | 1        | 0         | 0        |
| Type of colostomy for anorectal malformation – overcome by reviewing theatre notes                                                                                                              | 1        | 0        | 1         | 0        |
| Perianal fistula in ARM – diagnosis requires subspecialty physical examination                                                                                                                  | 1        | 0        | 1         | 0        |
| ASA score (not documented) and high output stoma in anorectal malformation (output not accurately measured)                                                                                     | 1        | 0        | 1         | 0        |
| <b>Were there any data points that you were unable to identify retrospectively during the validation process?</b>                                                                               |          |          |           |          |
| Yes                                                                                                                                                                                             | 1 (3%)   | 1 (8%)   | 0         | 0        |
| No                                                                                                                                                                                              | 30 (97%) | 11 (92%) | 18 (100%) | 1 (100%) |
| <b>If yes, what were your challenges? Do you think the Global PaedSurg local investigators at your centre would have been able to collect these data points prospectively during the study?</b> |          |          |           |          |
| Operative findings – prospectively this might have been easier as the responsible surgeon could be questioned directly                                                                          | 1        | 1        | 0         | 0        |

\*Denominator is the number of completed surveys as more than one answer could be selected. Percentages not calculated for data from free text boxes. Percentages have been rounded and may not total 100. When interpreting the above findings it is important to note that the validating collaborator collected the validation data retrospectively, whereas the study collaborators collected the data for the study prospectively and hence may not have experienced the same problems with collecting data from patient records and hospital documentation. ARM: Anorectal malformation. ASA: American Society of Anesthesiologists. CVC: Central venous catheter. HIC: High-income countries. LIC: Low-income countries. MIC: Middle-income countries. NICU: Neonatal intensive care unit. PICU: Paediatric intensive care unit.



**Supplementary Table 22: A comparison of the number of patients in the main study database and the number of eligible patients identified by validating local investigators**  
(23 hospitals [11 HIC,11 MIC,1 LIC] in 18 countries, 4 languages [English, Spanish, German, Lithuanian])

| Study condition           | All N         |                  |            | HIC N         |                  |            | MIC N         |                  |            | LIC N         |                  |            |
|---------------------------|---------------|------------------|------------|---------------|------------------|------------|---------------|------------------|------------|---------------|------------------|------------|
|                           | Main database | Validator survey | Difference | Main database | Validator survey | Difference | Main database | Validator survey | Difference | Main database | Validator survey | Difference |
| Oesophageal atresia       | 13            | 9                | -4         | 6             | 5                | -1         | 7             | 4                | -3         | 0             | 0                | 0          |
| CDH                       | 15            | 15               | 0          | 8             | 8                | 0          | 7             | 7                | 0          | 0             | 0                | 0          |
| Intestinal atresia        | 17            | 18               | +1         | 6             | 7                | +1         | 10            | 10               | 0          | 1             | 1                | 0          |
| Gastroschisis             | 13            | 13               | 0          | 5             | 6                | +1         | 8             | 7                | -1         | 0             | 0                | 0          |
| Exomphalos                | 9             | 11               | +2         | 1             | 1                | 0          | 8             | 10               | +2         | 0             | 0                | 0          |
| Anorectal malformation    | 19            | 22               | +3         | 5             | 5                | 0          | 14            | 17               | +3         | 0             | 0                | 0          |
| Hirschsprung's disease    | 8             | 10               | +2         | 4             | 3                | -1         | 4             | 7                | +3         | 0             | 0                | 0          |
| <b>Total (conditions)</b> | <b>94</b>     | <b>98</b>        | <b>4</b>   | <b>35</b>     | <b>35</b>        | <b>0</b>   | <b>58</b>     | <b>62</b>        | <b>4</b>   | <b>1</b>      | <b>1</b>         | <b>0</b>   |
| <b>Total (patients*)</b>  | <b>92</b>     | <b>96</b>        | <b>4</b>   | <b>34</b>     | <b>34</b>        | <b>0</b>   | <b>57</b>     | <b>61</b>        | <b>4</b>   | <b>1</b>      | <b>1</b>         | <b>0</b>   |

\*Discrepancy between total patients and total conditions is a result of two patients having two co-existing study conditions: 1) intestinal atresia and anorectal malformation; 2) exomphalos and anorectal malformation. Data was not available for eight hospitals. CDH: Congenital diaphragmatic hernia. HIC: High-income countries. LIC: Low-income countries. MIC: Middle-income countries.
